# Supplementary material for: QTL Mapping of Fiber-Related Traits Based on a High-Density Genetic Map in Flax (Linum usitatissimum L.)
Source: Front Plant Sci. 2018 Jul 17;9:885. doi: 10.3389/fpls.2018.00885 (PMC6056681; doi:10.3389/fpls.2018.00885)
Supplement: Table S1 — Summary of the sequencing data. [file Table_1.XLSX]

## Sheet: Sheet1
Table S1. Summary of the sequencing data.
>Marker20
TTGCATCAATCGGATTTCGAAGCAAGGATTTATGCCCAAAATACTGAGTATAGCTTAAAGATTGACGAAATTTATAGAATGGATTGTTAACTTTTTTGCTXXXXXXXXXXGAGATCCAAGCTCCTTGAAGATGTCAAAACTCTTTCCATTTCTTGTCCTAGCCCATCTACACACATCGTATTGCTTCAATCAATGCCTGAATGTCATTAT
TTGCATCAATCGGACTTCGAAGCAAGGATTTATGCCCAAAATACTGAGTATAGCTTAAAGATTGACGAAATTTATAGAATGGATTGTTAACTTTTTTGCTXXXXXXXXXXGAGATCCAAGCTCCTTGAAGATGTCAAAACTCTTTCCATTTATTGTCCTAGCCCATCTACACACATCGTATTGCTTCAATCAATGCCTGGATGTCATTAT
>Marker665
AACTCAAATTTTAAAGTATTTTACGGATCCTTTTTTGCTAGAATTTTTGACTATTTGTCAAGCTTTTTAGTAGCACAAGTTCGTTATCTAGAAGCCTTTCXXXXXXXXXXCTATTTAGTGTCACGTAAGGCTCTACATTATCCGAACAACTCATTTTTTTGCATACTCATATAATTCCTCCTACTATGTAACTTTCTTCTCTTTTGTAGT
AACTCAAATTTTGAAGTATTTTACGGATCCTTTTTTGCTAGAATTTTTGACTATTTGTCAAGCTTTTTAGTAGCACAAGTTCGTTATCTAGAAGCCTTTCXXXXXXXXXXCTATTTAGTGTCACGTAAGGCTCTACATTATCCGAACAACTCATTTTTTTGCATACTCATATAATTCCTCCTACTATGTAACTTTCTTCTCTTTTGTAGT
>Marker4371
ACAAATGGGATGTGATGGTAAGTTGTCATTGCCACCACGAGCAGTTACTTGAAATGGTCATGGCTAGATTGAAGGCTGAACAATCTCTGGTGTGTTGCAGXXXXXXXXXXGGCTGGACTGACATGGCTGCCATACCCATTGCTGCTGTCCCTGCAGCAAACTTCGCCCCAGATCAATGTAAGAGCTGCATCGTGTTGCATTGAATGTTCA
ACAAATGGGATGTGATGGTAAGTTGTCATTGCCACCACGAGCAGTTACTTGAAATGGTCATGGCTAGATTGAAGGCTGAACAATCTCTGGTGTGTTGCAGXXXXXXXXXXGGCTGGACTGACATGGCTGCCATACCCATTGCTGCTGTCCCTGCAGCAAACTTCGCCCCAGATCAATGTAAGAGCTGTATCGTGTTGCATTGAATGTTCA
>Marker4458
CTTTAAATCATATGTCTGGCTGCACTTCACCAGACTATTCATTCATGAAATTTTGAAAGCCAAATGCAACCACTATAAGAAGGTTTTGGCTGGGAAGTCTXXXXXXXXXXGATACTAGAATCACTTTAGAATTTGTAGGCTAGGATAGATATCTGTTTCTGTGTGTATTCTGCACACTACTGCCTCTTTTATATAGGCAGAGGGGTTCAG
CTTTAAATCATATGTCTGGCTGCACTTCACCAGACTATTCATTCATGAAATTTTGAAAGCCAAATGCAACCACTATAAGAAGGTTTTGGTTGGGAAGTCTXXXXXXXXXXGATACTAGAATCACTTTAGAATTTGTAGGCTAGGATAGATATCTGTTTCTGTGTGTATTCTGCACACTACTGCCTCTTTTATATAGGCAGAGGGGTTCAG
>Marker5860
AAAACGACAATGTAAAAACATCCCAAAGTAGGAGAACACAACATCCAAAGATAAGTATGAAATAACTGAAATCCTGAAACAATATGAAAACATGAAAACAXXXXXXXXXXCTAAACTAGACTGGTGTAAAACTGAACTTGCATATAGTAATGTGACCCTGTGGTCCGGTAGGCATCAACCTAGCATCAGCCACCCCTAGCTGTGAGCGAA
AAAACGACAATGTAAAAACATCCCAAAGTAGGAGAACACAACATCCAAAGATAAGTATGAAATAACTGAAATCCTGAAACAATATGAAAACATGAAAACAXXXXXXXXXXCTAAACTAGACTGGTGTAAAACTGAACTTGCATATAGTAATGTGACCCTGTGGTCTGGTAGGCATCAACCTAGCATCAGCCACCCCTAGCTGTGAGCGAA
>Marker5889
TTCCCTGGGTGATAATCTATCACATAGTCATAGTCCTTGAGCAACTCTACACAACATATCTATGTGTTGTTCACTGCTCTATCAAGTATTAGAGACTCTTXXXXXXXXXXAGATGCATACGCCACCACTCTGCTATCTTAATGTAGCCTAGCCCTGAATACGAGGCATCACTGTAGATCACATACTCACCCCCATCAACTGACAAGTTGA
TTCCCTGGGTGATAATCTATCACATAGTCATAGTCCTTGAGCAACTCTACACAACATATCTATGTGTTGTTCACTGCTCTATCAAGTATTTGAGACTCTTXXXXXXXXXXAGATGCATACGCCACCACTCTGCTATCTTAATGTAGCCTAGCCCTGAATACGAGGCATCACTATAGATCACATACTCACCCCCATCAACTGACAAGTTGA
>Marker5950
TATCATGATGGCTATTAATTTTCTTGATGTTATATTCGTTCTTTATTAGCTAGATTTTTTCCTAAAATCCCCGCTATTTATACTTGAAAGTCCTGCTTAGXXXXXXXXXXAACTAAGCACACATAACATACATATAATACTGAACCTGAAACCCTCATAACATAAGATAAAATACAACGTATAAAAACAGACATCAAGGCTCGAAATCAA
TATCATGATGGCTATAAATTTTCTTGATGTTATATTCGTTCTTTATTAGCTAGATTTTTTCCTAAAATCCCCGCTATTTATACTTGAAAGTCCTGCTTAGXXXXXXXXXXAACTAAGCACACAGAACATACATATAATACTGAACCTGAAACCCTCATAACATAAGATAAAATACAACGTATAAAAACAGACATCAAGGCTTGAAATCAA
>Marker6015
CTGGAATTTACTTACATATTAGACTTTCATCTATCTTATATACTTAAAATTATATAAAAAAGAACAAATATATTGCGATGAGATACCCCTTTGCGTGCACXXXXXXXXXXATTAATGAAATATAAGTGAAGGATACCTACGATAATGATTGTTCTTGTGCCTAACATGGAGCAAAACAATAATAGGATTGTTGACGAGGAGACGATCAAT
CTGGAATTTACTTACATATTAGACTTTCATATATCTTATATACTTAAAATTATATAAAAAAGAACAAATATATTGCGATGAGATACCCCTTTGCGTGCACXXXXXXXXXXATTAATGAAATATAAGTGAAGGATACCTACGATAATGATTGTTCTTGTGCCTAACATGGAGCAAAACAATAATAGGATTGTTGACGAGGAGACGATCAAT
>Marker6727
TTTGCCACGCTCGTGAGTAACTATGTTGTCATCAGATGCAACAATTCTTCGACACTTTTTGCAGCGGTAAACCAGTCCTAGTTTCTGGACATCACTAGCTXXXXXXXXXXCATCATGCATTCATATCAACGTTCCGAGGCAGAATTCGAGCATTCATACAAACCATGATATACACTATACAAACTTACCCTACGGAATGCAATGAAATCG
TTTGCCACGCTCGTGAGTAACTATGTTGTCATCAGATGCAACAATTCTTCGACACTTTTTGCAGCGGTAAACCAGTCCTAGTTTCTGGACATCACTAGCTXXXXXXXXXXCATCATGCATTCATATCAACGTTCCGAGGAAGAATTCGAGCATTCATACAAACCATGATATACACTATACAAACTTACCCTACGGAATGCAATGAAATCG
>Marker6754
TGAATTAATACGGTCAATTACTACACAGAACAAAAACTAACCGGCAAATCCATCGATCGCAAATTCTTCCTACAAATAGTAAAATTCAAGAAGCTGGGTAXXXXXXXXXXAAAAAACAATGGAGATGATGGAAAGGGCGGCAGAGAATAGATTACCTTCGGAGAGGGATGCTCTGTTCGTTAGCTTCGTGATTTCAGGCTCTCAGCTGGT
TGAATTAATACGGTCAATTACTACACAGAACAAAAACTAACCGGCAAATCCATCGATCGCACATTCTTCCTACAAATAGTAAAATTCCAGCAGCTGGGTAXXXXXXXXXXAAAAAACAATGGAGATGATGAAAAGGGCGGCAGAGAATAGATTACCTTCGGAGAGGGATGCTCTGTTCGTTAGCTTCGTGATTTCAGGCTCTCAGCTGGT
>Marker6909
ACAGTAAATTCCATGCACCCTGCATCTTTTCCATGCATGTTGAAGTGCCTTCTCCTACCAATAAGGTAACTTAATTTGCATCACATTATTACTTGTAAATXXXXXXXXXXCTGGATTAGCAAAGTTGTTCCTAGATGGATGTTTCATATGAGGTCAAACTTTCTTCTGGATTCAGATTTGTATCTACTTCATGTAGAGGTAAAAATGTAA
ACAGTAAATTCCATGCACCCTGCATCTTTTCCATGCATGTTGAAGTGCCGTCTCCTACCAATAAGGTAACTTAATTTGCATCACATTATTACTTGTAAATXXXXXXXXXXCTGGATTAGCAAAGTTGTTCCTAGATGGATGTTGCATATGAGGTCAAACTTTCTTCTGGATTCAGATTTGTATCTACTTCATGTAGAGGTAAAAATGTAA
>Marker7217
TCTCAGACGAAAGCTCATTCATTAGGGAACCAAGTGTCATACTTTTCTTAACACCTGATCCACACAGGATAATAAGAAACTTGGAATGAGCTCTAACTGAXXXXXXXXXXTTGAGAAATTTGAGTTGGACCTGCAAAATACTTAATACAAAGCAGAAAAATCTTACCTGAGGAAAACTGGAGAGTTCACTTTCCCATATACAAGGGACAA
TCTCAGACGAAAGCTCATTCATTAGGGAACCAAGTGTCATACTTTTCTTAACACCTGATCCACACAGGATAATAAGAAACTTGGAATGAGCTCTAACTGAXXXXXXXXXXTTGAGAAATTTGAGTGGGACCTGCAAAATACTTAATACAAAGCAGAAAAATCTTACCTGAGGAAAACTGGAGAGTTCACTTTCCCATATACAAGGGACAA
>Marker7228
ATCTTCTCCACCTTGAAAAGCACGCAGTTCATCCTCCAACCAATCCCTGATGAGTGCAGAATCAAAGGATAGTTTCAGAGTAATTTATGAAGTCGTTCGCXXXXXXXXXXGAAGAAGATTAAAAAGGAGGCGTAAAGATGTATTACAGATAAATATGATGGCTGGTGGAGAAAGAGAAAACAATGGAAATGACAACAGATAGAAAACAAG
ATCTTCTCCACCTTGAAAAGCACGCAGTTCATCCTCCAACCAATCCCTGATGAGTGCAGAATCAAAGGATAGTTTCAGAGTAATTTATGAAGTCGTTCACXXXXXXXXXXGAAGAAGATTAAAAAGGAGGCGTAAAAATGTATTACAGATAAATATGATGGCTGGTGGAGAAAGAGAAAACAATGGAAATGACAACAGATGGAAAACAAG
>Marker7242
ATACCTTGCATGAGACCCATTCTGCAAATGAAGGATAATATATGTCTCTGAATTCATCCAGAGGTCGAGAAATTAATAAAAATATCCGTTTTACTGCAACXXXXXXXXXXTAGTGCAGCATAAGGCTTTTGAAACTAGTGAGCCAAAAAAGAGAGAGAGCCCCAGCTTGAACCTTTGTTGCCAATTGCAGACCCGCCTCCAGAAGTATAG
ATACCTTGCATGAGACCCATTCTGCAAATGAAGGATAATATATGTCTCTGAATTCATCCAGAGGTCGAGAAATTAATAAAAATATCCGTTTTACTGCAACXXXXXXXXXXTAGTGCAGCATAAGGCTTTTGAAACTAGTGAGCCAAAAAAAAGAGAGAGCCCCAGCTTGAACCTTTGTTGCCAATTGCAGACCCGCCTCCAGAAGTATAG
>Marker9789
GTTGACCACCAGCCGCAGCGAACGCTTACACGCGACTTACACCGGCTATAGCACCGCCGGTCATCCAACCACCGGCGCGTCAGAACTCCAAGAGGAAGATXXXXXXXXXXATTGGGGGAAGATTCTGCGGGTGAGGTCGGCGGAGTCGATGAATGAGATGAGCGACTACGACGGAGATGATTCGGAAGAGATGATGGTCCCGCCGCATGA
GTTGACCACCAGCCGCAGCGAACGCTTACTCGCGACTTACACCGGCTATAGCACCGCCGGTCATCCAACCACCGGCGCGTCAGAACTCCAAGAGGAAGATXXXXXXXXXXATTGGGGGAAGATTCTGCGGGTGAGGTCCGCGGAGTCGATGAATGAGATGAGCGACTACGACGGAGATGATTCGGAAGAGATGATGGTCCCGCCGCATGA
>Marker10160
CGACGTTTCTATCCAAATACAAATACTACACGTACAGGATATTCAGCCACGAAAGTCAAGACATATTGAACGTGGCGGCTAGAATGGGATACTCGTTATTXXXXXXXXXXGTTCACAACCGGAGTTAAGACCGACGTCGGAATGATGCTTAGATCCGGCAGAAAGATTATGATCCTCGGGATCGCATCCGTGCTCGTCCCGTTCATCATC
CGACGTTTCTATCCAAATACAAATACTACACGTACAGGATATTCAGCCACGAAAGTCAAGACATATTGAACGCGGCGGCTAGAATGGGATACTCGTTATTXXXXXXXXXXGTTCACAACCGGAGTTAAGACCGACGTCGGAATGATGCTTAGATCCGGCAGAAAGATTATGATCCTCGGGATCGCATCCGTGCTCGTCCCGTTCATCATC
>Marker15248
TAACATCAGAAAAACTGCCTGAAACATATTGTTAGTTTCCCACATCTAAAAGAATTCGACGAAACACACATGTTGGGGAAGAGAACTTGTCCCTAAGGATXXXXXXXXXXTTCGCCTCTTTCCAGATCGACCAAAGAAATGAGTGCAACAAGATTTTTGCAGCTTTTCAAAAACCATTGACACAGTTCATACCTTTTCAAGACGAAATGA
TAACATCAGAAAAACTGCCTGAAACATATTGTTAGTTTCCCACATCTAAAATAATTCGACGAAACACACATGTTGGGGAAGAGAACTTGTCCCTAAAGATXXXXXXXXXXTTCGCCTCTTTCCAGATATACCAAAGAAATGAGTGCAACAAGATTTTTGCAGCTTTTCGAAAACCATTGACACAGTTCATACCTTTCCAAGACGAAATGA
>Marker15286
ATCGACAGCACCCACTTCTCCGTCCCGTCGGGACTCGCCGCCGTTGAGCTGGTCGCCGGGAGGGAAAGCGCCATCGCCCAGGTCATTAGAACAATCCCTGXXXXXXXXXXGCTGCCAGCTTGGTGTTCCAGGCTCAGTCGGAGAGGACTCGGGTCACTTTCTATAGCGGGTATTATCATACAAAGCTGAATGACTATGGTCACCTTTGTG
ATCGACAGCACCCACTTCTCCGTCCCGTCGGGACTCGCCGCCGTTGAGCTGGTCGCCGGGAGGGAAAGCGCCATCGCCCAGGTCATCAGAACAATCCCGGXXXXXXXXXXGCTGCCAACTTGGTGTTCCAGGCTCAGTCGGAGAGGACTCGGGTCACTTTCTATAGCGGGTATTATCATACAAAGCTGAATGACTATGGTCACCTTTGTG
>Marker16527
TATGATGTAGAGTTCATGGAAGGAATGTTTTCATGCATTTCATCTCAACACCTCAATGATCAGAGTGATAAACCAGTTCCTCTTTCAATTCCATCTAGTGXXXXXXXXXXGAAACCTATGTAGAGATCATGACATTGTTGGAAGCAAGCTTCTGGAAGGAAGCATCTAATAGTGAAATTGACTCAATTAGAGAAAAACATACTCGGGAGA
TAAGATGTAGAGTTCATGGAAGGAATTTTTTCATGCATTTAATCTCAACACCTCAATGATCAGAGTGATAAACCAGTTCCTTTTTCAATTCCATCTAGTGXXXXXXXXXXGAAACCTATGTAGAGATCATGACATTGTTGGAAGCAAGCTTCTGGAAGGAAGCATCTGATAGTGAAATTGACTCAATTAGAGAAAAACATACTCGGGAGA
>Marker16554
AAAAGATTATAGCTACCAGACTTTGGTCCTTCAGCTAATCTACAGAGGCAAGGTCATCGTCCGTTAAAACACATGCTTATACATACATGATGTGGGAGAAXXXXXXXXXXAGACAATGAAAGGAGGAGGCAGTTTAACATAATGGTTGTAATTACAACAAATTGGAACTACAAAGAGGCAATTGAATTTAACAGATGTAATTAACAAGCA
AAAAGATTATAGCTACCAGACTTTGGTCCTTCAGCTAATCTACAGAGGCAAGGTCATCGTCCGTTAAAACACATGCTTATACATACATGATGTGGGAGAAXXXXXXXXXXAGACAATGAAAGGAGGAGGCAGTTTAACATAATGGTTGTAATAACAACAAATTGGAACTACAAAGAGGCAATTGAATTTAACAGATGTAATTAACAAGCA
>Marker16572
ATGAAGTGACGCTTGAAAGTGTGGAGTTTAAGAAAGTGCATGAGCTAATGAGCGAGAAGGAAATTATCGGTAACGAAACGTTGCCTAACAAACCTATTTTXXXXXXXXXXCAGAAGGCGGCCGGATCTAAAGAACTCTTGAAAAACCGTACTGACATTCGGACCAACTATAGACCAGAAGCGCTCGAAGAAAAGGCTCGTGAACCCATGA
ATGAAGTGACGCTTGAAAGTGTGGAGTTTAAGAAAGTGCATGAGCTAATAAGCGAGAAGGAAATTATCGGTAACGAAATGTTGCCTAACAAACCTATTTTXXXXXXXXXXCAGAAGGCGGCCGGATCTAAAGAACTCTTGAAAAACCGTACTGACATTCGGACCAACTATAGACCAGAAGCGCTGGAAGAAAAGGCTCGTGAACCCATGA
>Marker16603
ACGCAAGGCGTAGGGCGGTCGGGGTTAGGTCTCGGAAGCTAGGGCTATCGGAGAGTGGGGATGGAGCGCCCATTGCCATCCTACCACCGGAGTCCTTCCAXXXXXXXXXXTGACATGAAAATACGGAAGCCTAGTCCACCATCTATGTTGGGAGACTTGACCTAAGGAATCCAAACGTAATCACGTTGGAATGAAGAACGACTGAAGGGA
AGGCAAGGCGTAGGGCGGTCGGGGTTAGGTCTCGGAAGCTAGGGCTATCGGAGAGTGGGGATGGAGCGCCCATTGCCATCCTACCACCGGAGTCCTTCCAXXXXXXXXXXTGACATGAAAATACGGAAGCCTAGTCCACCATCTATGTTGGTAGACTTGACCTAAGGAATCCAAACGTAATCACGTTGGAATGAAGAACGACTGAAGGGA
>Marker16733
ATGAAGTGACGCTTGAAAGTGTGGAGTTTAAGAAAGTGCATGAGCTAATAAGCGAGAAGGAAATTATCGGTAACGAAATGTTGCCTAACAAACCTATTTTXXXXXXXXXXTAAAAAGCCATGCATAGGGGTCTGAGGTGGTGCATAGAATCAGCTTCGTCCACATTAGGGAGGAGGGTATGCCAAGTATGATTAAAAGACCGCAGAAGGC
ATGAAGTGACGCTTGAAAGTGTGGAGTTTAAGAAAGTGCATGAGCTAATGAGCGAGAAGGAAATTATCGGTAACGAAACGTTGCCTAACAAACCTATTTTXXXXXXXXXXTAAAAAGCCATGCATAGGGGTCTGAGGTGGTGCATAGAATCAGCTTCGTCCACATTAGGGAGGAGGGTATGCCAAGTATGATTAAAAGACCGCAGAAGGC
>Marker16887
CAACAGTTTTGAGTTAAGCCATAATTGTTCCGTTCTTTGACATTTGACCGTATTTCGGGTCAACATGCTTAATTCCAGGTTAGTTGGTTTAAGGGGGTAAXXXXXXXXXXATTGGCATTGATTGATCACCTAGTTAGAGCCCATATGTTGACGATCGTGCTTAATGCACTATAGCTACGCGATGGGCTTCCCACACTAACTGTTGCCGTG
CAACAGTTTGAGTTAAGCCATAATTGTTCCGTTCTTTGACATTTGACCGTATTTCGGGTCAACCTGCTTAATTCCAGGTTAGTTGGTTTAAGGGGGTAATXXXXXXXXXXATTGGCATTGTTTGATCACCTAGTTAGAGCCCATATGTTGACGATCGTGCTTAATGCACTATAGCTACGCGATGGGCTTCCCACACTAACTGTTGCCGTG
>Marker17525
AGCCGAAATTGAATCAGTAATTAGGTTAAAACCCCAACATCCATACAAAAGCTGAGCTAAAACTTCATATCATCCAAACAATACGAAAGGTTTAGCTAGTXXXXXXXXXXCCAATCGTTGATATTCCCTCGCTTCAATCAATCTTTGAAACTTTAGCTCTCTCTAAGAGCTCGAAAATATATATATAATGAAGTCTAATCCGTCAATAGG
AACCGAAATTGAATCAGAAATTAGGTTAAAACCCCAACATCCATACAAAAGCTGAGCTAAAACTTCATATCATCCAAACAATACGAAAGGTTTAGCTAGTXXXXXXXXXXCCAATCGTTGATATTCCCTCACTTCAATCAATCTTTGAAACTTTAGCTCTCTCTAAGAGATCGAAAATATATATATAATGAAGTCTAATCCGTCAATAGG
>Marker17552
CAAAATTATAATTAACTTACGTCCAAATGGTAAAATTTCACAACTTTTAGATTTTTCATATCAGAACCAAAACTCTGAAGCGAGAAAAAACCATAATTTAXXXXXXXXXXCGTCAAGGATCGGGATCTAGACCTGCGATATCACCGGTGGCTCCTCGCAGATACTCACCACAAACGGGGATCACTACCTCTTCGACCGACGCAACTGGCG
CACAATTATAATTAACTTACGTCCAAATGGTAAAATTTCACAACTTTTAGATTTTTCATATCAGAACCAAAACTCTGAAGCGAGAAAAAACCATAATTTAXXXXXXXXXXCGTCAAGGATCGGGATCTAGACCTGCGATATCACCGGTGGCTCCTCGCGGATACTCACCACAAGCGGGGATCACTACCTCTTCGACCGACGCAACTGGCG
>Marker18057
GGGTATGAATTGATTAACATCCCTTCCTTCCGCTCCAATATTTGAAGTCTCACCTGCAATTGCATTGTTAGATAATACTATATTTTCAAATCCTATTCACXXXXXXXXXXATATACTGTGAATGAAGATGAGGTAGTTGTAATGGATAAGATTTGAATTTATTAATTAAAAGGCAGAATTATATGAAAGACAACCCTATACACTGTATTA
GGGTATGAATTGATTAACATCCCTTCCTTCCGCTCCAATATTTGAAGTCTCACCTGCAATTGCATTGTTAGATAATACTATATTTTCAAATCCTATTCACXXXXXXXXXXATATACTGTGAATGAAGATGAGGTAGTTGTAATGGATGAGATTTGAATTTATTAATTAAAAGGCAGAATTATATGAAAGACAACCCCATACACTGTATTA
>Marker20820
AACCATGCGTGAGCATAACGTCAATGGATAGACTCACACGATGCGGGTTTTCGATCACACAGCTGGATAATATGATGTAGTTAGTGCATACAACAACATAXXXXXXXXXXTGCAACGCAGTCAACCTCAACCCATACCACTTCGTGCATTCCATGTTCAAGCTGTCCATAGTTGCTCAGATATATGATGTTAGTTTTCGTCCTATCGATG
AACCATGCGTGAGCATAACGTCAATGGATAGACTCACACGATGCGGGTTTTCGATCACACAGCTGGATAATATGATGTAGTTAGTGCATACAACAACATAXXXXXXXXXXTGCAACACAGTCAACCTCAACCCATACCACTTCGTGCATTCCATGTTCAAGCTGTCCATAGTTGCTCAGATATATGATGTTAGTTTTCGTCCTATCGATG
>Marker27691
TTTCTTTCTAAAGCTTCTAGACTAGAATCTATATTTAGTGGCTTCATCACCCATAATGGCTTATGATCACGGTGGACTGATAAATGACAAACCTTTCACTXXXXXXXXXXCACTTCCTCCAGACCGCTTGCTTGTGGGTGGTAAGCGCTGATCAATCAATAAGTTGTCCCACTTAATTGGAAAACTGAATTGAAAATACTGTGAAAGTGA
TTTCTTTCTAAAGCTTCTAGACTAGAATCTATATTTAGTGGCTTCATCACCCATAATGGCTTATGATCACGGTGGACTGATAAATGACAAACCTTTCACTXXXXXXXXXXCACTTCCTCCAGACCGCTTGCTTGTGGGTGGTAAGCGCTGATCAATCAATAAGTTGTCCCACTTAATTGGAAAACTGAATTGAAAACACTGTGAAAGTGA
>Marker28989
CGCAACGGAGGCAACATAGCAGCTCATCCTTACAGTTTAGCTTTATGGGTCCCAAGCTGTTTGTGAACACAATCCCGGTAACGCTTTAGCTTCTGTGATCXXXXXXXXXXAGTAAATGATTCATGGAGGATGGATGGCATTTGGTAAAGATCAGTTCTTTTTGTGAATAATGTTTTCCTTGTTATTCCATGCAGGTTGACGTCGGTCAGA
CGCAACGGAGGCAACATAGCAGCTCATCCTTACAGTTTAGCTTTATGGGTCCCAAGCTGTTTGTGAACACAATCCCGGTAACGCTTTAGCTTCTGTGATCXXXXXXXXXXAGTAAATGATGCATGGAGGATGGATGGCATTTGGTAAAGATCAGTTCTTTTTGTGAATAATGTTTTCCTTGTAATTCCATGCAGGTTGACGTCGGTCAGA
>Marker29202
ACCCCAATTTATGCACATGACTTATCGAAGTTGTGCAAACCTCAAAATTTCCGTTTGAGGAGGCGTGTTAGTGAATGATATAAATACCGATCAAAATCCTXXXXXXXXXXCGAAAGGTTTAACTTAACTAATTATTAATATAAATTTTATTTTCAAGGATTCTATATAAATATCTCTTTCGGATGAATCGAGAGCGGTGGTTTCTTAGCT
ACCCCAATCTATGCACATGACTTATCGAAGTTGTGCAAACCTCAAAATTTCCGTTTGAGGAGGCGTGTTAGTGAATGATATAAATACCGATCAAAATTCTXXXXXXXXXXCGAAAGGTTTAACTTAACTAATTATTAATATAAATTTTATTTTCAAGGATTCTATATAAATATCTCTTTCGGATGAATCGAGAGCGGTGGTTTCTTAGCT
>Marker29813
ATCCATTGCATTTTGAGTAAATGATATACAAATCCTTGATTACACACTCTAATCCATATTAAGTAATCCTCAATTTACCAGGTGTCTCGTCCAACGCCTTXXXXXXXXXXACCCTCGCGATCAGCCCCTGATCCGACATATGGGCAAGATGAGGAGGGAATTGGGGGGGACGGTTGATGTTACGTGGTGTTGAGATGTAGGAAACTGAGT
ATCCATTGCATTTTGAGTAAATGATATACAAATCCTCGATTACACACTCTAATCCATATTAAGTAATCCTCAATTTACCAGGTGTCTCGTCCAACGCCTTXXXXXXXXXXACCCTCGCGATCAGCCCCTGATCCGACATATGGGCAAGATGAGGAGGGAATTGGGGGGGACGGTTGATGTTACGTGGTGTTGAGATGTAGGAAACTGAGT
>Marker29838
CCTTATTACAAACAACAAATACGAGTAACCCGGTTCAGGTTAGATCCTTTAAGCTTGTAAGTTTTATCTCATAACAATCACAGTCTGCATTTCATTCCAAXXXXXXXXXXTCGATAATCTACACTCAGCAAGCTACATAACCTTAGTTGGAATCTCGAGACCAAGCTCATAGACGCAACTCACAATAACAATTAGCTCCGTGATATACCA
CCTTATTACAAGCAACAAATACGAGTAACCCGGTTCAGGTTAGATCCTTTAAGCTTGTAAGTTTTATCTCATAACAATCACAGTCTGCATTTCATTCCAAXXXXXXXXXXTCGATAATCTACACTCAGCAAGCTACATAACCTTAGTTGGAATCTCGAGACCAAGCTCATAGACGCAACTCACAATAACAATTAGCTCCGTGATATACCA
>Marker30544
TAATTCAGCTGGTTAAGACTGTCGATTAGTGTAACTACGGTTACCCAAAGGTTCTGAGTTTGAATCCTAATTTTTTATTTAAAAAGGGAGAAGTGCGGAAXXXXXXXXXXGTTCTGAGTTTGAATCCTAATTTTTTATTTAAAAAGGGAGAAGTGCGGAATTAACCAATATTAAAGCGAGCCCTTGATACCCCAAACAAGAAGTTAATTA
TAATTCAGCTGGTTAAGACTGTCGATTAGTGTAACTACGGTTATCCAAAGGTTCTGAGTTTGAATCCTAATTTTTTATTTAAAAAGGGAGAAGTGCGGAAXXXXXXXXXXGTTCTGAGTTTGAATCCTAATTTTTTATTTAAAAAGGGAGAAGTGCGGAATTAACCAATATTAGAGCGAGCCCTTGATACCCCAAACAAGAAGTTAATTA
>Marker30563
CAAAGAAGGGCAGATTCATGGTTGTGCCTAACAATAAGGGAGAACTCATCCCTACTCTGACAGTCACCGGATGGAGAGTATGCATTGATTACATGTGCCTXXXXXXXXXXCATTCACATGCCCCTTCAACACATTTGCATACAAGCGCGTTCTCTTTAGTCTATGCAATGCACTCGTGACATTTCAAAGGTGTATAACAGTGATCTTTGG
CAAAGAAGGGCAGATTCATGGTTGTGCCTAACAATAAGGGAGAACTCATCCCTACTCTGACAGTCACCGGATGGAGAGTGTGCATTGATTACATGTGCCTXXXXXXXXXXCATTCACATGCCCCTTCAACACATTTGCATACAAGCGCGTTCTCTTTAGTCTATGCAATGCACTCATGACATTTCAAAGGTGTATAACAGTGATCTTTGG
>Marker31644
GAAGAAATGCAAGGGTGGCGGTGACCACGACGGTGACTGGGAACAAGAACGGTGGAGGAGGAGAAGGTAGTAATAAGCACAAGTATGGCGGAAATGAGTTXXXXXXXXXXGAGAAGGACGGCGATAAGAAGACAAAGGAAGAGAAGGGTAAGGAGAAGAAAGGTAGCAAGGCGGTGCGACAAGTTTCGAACAAAGATATGGCGAGGGAGC
GAAGAAATGCAAGGGTGGCGGTGACCACGACGGTGACTGGGAACAAGAACGGTGGAGGAGGAGAAGGTAGTAATAAGCACAAGTATGGCGGAAATGAGTTXXXXXXXXXXGAGAAGGACGGCGATAAGAAGACAAAGGAAGAGAAGGGTAAGGAGAAGAAGGGTAGCAAGGCGGTGCGACAAGTTTCGAACAAAGATATGGCGAGGGAGC
>Marker34183
AAAAGGTTGCAATCAAGGACAAGGACTAAGTGGCAGCTATAGTCAATAGAATGACCCATGTTGGAAAAGAATCGGTGGCATAATTCGCATCCCGATAGATXXXXXXXXXXGTGATTAATATTTTATCATATAACCATAGGGATAGTTCAATGTGTTCATCATCGCAAGCCCGACTTGGAATGTGAATCATCTAAGTAACATTATCATGAA
AAAAGGTTGCAATCAAGGACAAGGACTAAGTGGCAGCTATAGTCAATAGAATGACCCATGTTGGAAAAGAATCGGTGGCATAATTCGCATCCCAATAGATXXXXXXXXXXGTGATTAATATTTTATCATATAACCATAGGGATAGTTCAATGTGTTCATCATCGCAAGCCCGACTTGGAATGTGAATCATCTAAGTAACATTATCATGAA
>Marker36020
TTGTTTTTTTACGAGTAGGTCGTCCTGTTGTCGTAGTTGCTGTCACAGTTTTCGTTGTTGTAGTTGCACTTGCTGCATTAATAACTTGTAGGCTTTAGAGXXXXXXXXXXATAACTTGTAGGCTTTAGAGGATTCGCTTACTCCAAGAAATATGCACTTCTGACTCTTTTTATCTAACTTCTTCCTTTGAACATCTGAAATGTGAGCATA
TTGTTTTTTTACGAGTAGGTCGTCCTGTTGTCGTAGTTGCTGTCACAGTTTTTGTTGTTGTAGTTGCACTTGCTGCATTAATAACTTGTAGGCTTTAGAGXXXXXXXXXXATAACTTGTAGGCTTTAGAGGATTCGCTTACTCCAAGAAATATGCACTTCTGACTCTTTTTATCTAACTTCTTCCTTTGAACATCTGAAATGTGAGCATA
>Marker36278
TTGATGCCAAGGGTTTGGTGAGGTGAGAGGTTAAGTAACGGAGAGTGGCAAGGATGTGGATTGAGGGCAATAAGGGTGACGAGCTTGATTCGAGTGGGTTXXXXXXXXXXGGTTTTGGGTGAGGGTCGAGTGTGGTTTGTGACTAATTAAGGGGGTTTTTTTTGTATTTTTCTCTTAATGACTTGCTGATTTTTGTGATTACTAACTAAT
TTGATGCCAAGGGTTTGGTGAGGTGAGAGGTTAAGTAACGGAGAGTGGCAAGGATGTGGATTGAGGGCAATAAGGGTGACGAGCTTGATTCGAGTGGGTTXXXXXXXXXXGGTTTTGGGTGAGGGTCGAGTGTGGTTTGTGACTAATTAAGGGGTTTTTTTTTGTATTTTTCTCTTAATGACTTGCTGATTTTTGTGATTACTAACTAAT
>Marker36648
TGAAGAATAACCTCAGAGAAACATCAAGGTTCAAACTTCAACATAGTCTGCAGGATCCTGCCAAAGAATAATCTTAGAGTTCTATTCTGCCTTTCTTCAAXXXXXXXXXXTATTTTATATTCACTCTCTCAGTAACAACAACATTGGATTTGACTATCTACTGCTGTTTTGCTTATGGAATTGGTGAAACCACTACTTTCCCAGTAGCAT
TGAAGAATAACCTCAGAGAAACATCAAGGTTCAAACTTCAACATAGTCTGCAGGATCCTGCCAAAGAATAATCTTAGAGTTCTATTCTGCCTTTCTTCAAXXXXXXXXXXATATTTATATTCACTCTCTCAGTAACAACAACATTGGATTTGACTATCTACTGCTGTTTTGCTTATGGAATTGGTGAAACCACTACTTTCCCAGTAGCAT
>Marker40306
TCTTCCTGTGCTCCCTTCAGCAGCTCGCCGAACAGAGGATGATTAATGTATATCACCGGAACCAACACCCTCCGACACACATCGCCGCCGTCACCCTTTTXXXXXXXXXXTGACCGACGTATACCGCCAGTTGACCCTTCGGAACCGGAACCGGTTCATAACCAGAACCGAACCTGCGGCTCGGGTTGCGAATCGATTGGGCTAATCGGA
TCTTCCTGTGCTCCCTTCAGCAGCTCGCCGAACAGAGGATGATTAATGTATATCACCGGAACCAACACCCTCCGACACACATCGCCGCCGTCACCCTTTTXXXXXXXXXXTGACCGACGTATACCGCCAGTTGACCCTTCGGAACCGGAACCGGTTCGTAACCAGAACCGAACCTGCGGCTCGGGTTGCGAATCGATTGGGCTAATCGGA
>Marker41296
TTTTAATGGAATTAAACCTATTATATAATTATCATCATACTTATGCTAATAATAATATTGTTATTAATAACAATAAGAGTAATAATAAATCATCATAAAGXXXXXXXXXXGGTGATATCAAACTACCCCACATTTGAACATTGATTGTCGTCAAGCAATCCTACTAATCACACTCAATATCAACTCAAAATGTGATGATAGGAAAAACAT
TTTTAATGGAATTAAACCTATTATATAATTATCATCATACTTATGTTAATAATAATATTGTTATTAATAACAATAAGAGTAATAATAAATCATCATAAAGXXXXXXXXXXGTTGATATCAAACTACCCCACATTTGAACATTGATTGTCGTCAAGCAATCCTACTAATCACACTCAATATCAACTCAAAATGGGATGATAGGAAAAACAT
>Marker41479
TGTCAAGAACAAGCATAAATGATGTAGGGAGAAATAACCCGCAAATAGGATCCAAATAGAATAACTCGAGTCAAAATATTAGGGAAAGCCTGAAACATACXXXXXXXXXXTGAAACATACACATGAAAAGAAGATAATAAGAAACATTACATGGATAATAACTGCCATAACTATATTTTGATTTATGGGGTCAAACAGGTAAAAACAACA
TGTCAAGAACAAGCATAAATGATGTAGGGAGAAATAACCCGCAAATAGGATCCAAATAGAATAACTCGAGTCAAAATATTAGGGAAAGTCTGAAACATACXXXXXXXXXXTGAAACATACACATGAAAAGAAGATAATAAGAAACATTACATGGATAATAACTGCCATAACTATATTTTGATTTATGGGGTCAAACAGGTAAAAACAACA
>Marker41489
TACAAATTGGATCGGGTTCTAGCTAGAGAGGTATGTGTTGCTATATCATTTAACTGCCAAATTGTCTACTAAATGTCTAGGATTAGGGAAGTTCTTTCTTXXXXXXXXXXGTTGGGGTTAAGCAACACGGGTTATGCGGAGGTCTCCTGTCGTGTGTGTCCTGTTTTGCTGCATCGAGAACAATGATCAAGGTTTGAAATTCTAGTGGTG
TACAAATTGGATCGGGTTCTAGCTAGAGAGGTATGTGTTGCTATATCATTTAACTGCCAAATTGTCTATTAAATGTCTAGGATTAGGGAAGTTCTTTCTTXXXXXXXXXXGTTGGGGTTAAGCAACACGGGTTATGCGGAGGTCTCCTGTCGTGTGTGTCCTGTTTTGCTGCATCGAGAACAATGATCTAGGTTTGAAATTCTAGTGGTG
>Marker41506
ACCCATTATGCCGTGCTCCCACCCTAGCATGATTAACTTTATAATTCTTAGAATAACTCATCCATTTCACCCTTCAAATGTGTCTTGTGATTAATTAGGGXXXXXXXXXXGGGTCCCTCAATAATAAACACCAAGTGCTTGAAGAAATGCCTAGGAACCAAGATAACCTTGGAGGCATTACGAACATATGACGAGGGTGGCTTTGAATCG
ACCCATTATGCCGTGCTCCCACCCTAGCATGATTAACTTTAGAATTCTTAGAATAACTCATCCATTTCACCCTTCAAATGTGTCTTGTGATCAATTAGGGXXXXXXXXXXGGGTCCCTCAATAATAAACACCAAGTGCTTGAAGAAATGCCTAGGAACCAAGATAACCTTGGAGGCATTACGAACATATGGCGAGGGTGGCTTTGAATCG
>Marker41545
CTGTCATGGGGACTTTATACTTGTCTACTGCAAAGCTTGCATTTTGTAGTGATAATCCTCTCTCATACAATGTTGCTGATCAAACTCAATGGAGCTATTAXXXXXXXXXXCTGTCTCTCTCTGGTTTGTTTGTGCTGGCTTATTTTTCTGGATGTGCGCGTAAGCCTTTGGTTAATTTCACATCATAAACAGACTGTCAATTCATTATGG
CTGTCATGGGGACTTTATACTTGTCTACTGCAAAGCTTGCATTTTGTAGTGATAATCCTCTCTCATACAATGTTGCTGATCAAACTCAATGGAGCTATTAXXXXXXXXXXCTGTCTCTCTCTGGTTTGTTTGTGCTGGCTTATTTTTCTGGATGTGCGCTTAAGCCTTTGGTTAATTTCACATCATAAACAGACTGTCAATTCATTATGG
>Marker41564
TTAGACCGACCACTCACATAAAAAAGAGGTAAATCTTAAGGGTCAAGTCGAAGGAACCATCAAGAAAAGTCAGAAAGCCTGACCTCGATAATACAAAATCXXXXXXXXXXGAAATAACAAAAAGGAGCCTTACCCAACAACGAAGGGGATTCCTTATTAGACTAGGACACTAATTTGACGAATTCAACTCCATTTCCTATAAGCTAGATT
CTAGACCGACCACTCACATAAAAAAGAGGTAAATCTTAAGGGTCAAGTCGAAGGAACCACCAAGAAAGGTCAGAAAGCCTGACCTCGATAATCCGAAATCXXXXXXXXXXGAAATAACAAAAAGGAGCCTTACCCAACAACGAAGGGGATTCCTTATTAGACTAGGACACTAATTTGACGAATTCAACTCCATTTCCTATAAGCTAGATT
>Marker44260
TTATATAGACTAATTGCTTGATAATCAAATTAGGAGAATGGATGATCCAAGAGGAAACAAAGACAATTCATGGACATGTTGATATCCCTGAGTTCTCTTAXXXXXXXXXXCCATACTAAGCACTGGATCAGGGTTAAGAATTCTAATTTAGAATCTGAAACTGTTCATCCCTGTTGCCTCATAGGGGTGTAGGAAACGACCAAAAGCAAT
TTATATAGACTAATTGCTTGATAATCAAATTAGGAGAATGGATGATCCAAGAGGAAACAAAGACAATTCATGGACATGTTGATATCCCTGAGTTCTCTTAXXXXXXXXXXCCATACTAAGCACTGGATCAGGGTTAAGAATTCTAATTTAGAATCTGAAACTGTTCATCCCTGTTGCCTCATAGGGGTGTAGGAAACAACCAAAAGCAAT
>Marker45009
CTGACAAGGAGGCTGTGCGAGATAAGGAAGATCCCAAGGCGCACAATCGGTCTCGGCTTCGGCTTCCATTCAGGAGTCGCAGCTGCAACCTCCTTCTCCGXXXXXXXXXXGCCCGAACAAAGAGGTGAAATACCAATTTAATCATCAAAGTTGCAGATATGTATCACATTGAACACATAAAAATCTTAATTGGTTTATTCGGATACGTTG
CTGAAAAGGAGGCTGTGCGAGATAAGGAAGATCCCAAGGCGCACAATCGGTCTCGGCTTCGGCTTCCATTCAGGAGTCGCAGCTGCAACCTCCTTCTCCGXXXXXXXXXXGCCCGAACAAAGAGGTGAAATGCCAATTTAATCATCAAAGTTGCAGATATGTATCACATTGAACACATAAAAATCTTAATTGGTTTATTCGGATACGTTG
>Marker45773
ACTTTCTTTTCTTCTTCTTCTTCCGTCACAACCACTTTTGCCTCATTCTTCTTCTTCTTGATATTCTCTGCCGAACCATTTCCCACAATCAGACACATTTXXXXXXXXXXCTGACCATTCCGTTTCCTGACAACCAACCCACAAGAACCCTAATTGAATTTTTTTGCTCAAATCCAGAAAGAAAGATCGAGAAGGTTTTCTTTAATTTAT
ACTTTCTTTTCTTCTTCTTCTTCCGTCACAACCACTTTTGCCTCATTCTTCTTCTTCTTGGCATTCTCTGCCGAACCATTTCCCACAATCAGACACATTTXXXXXXXXXXCTGACCATTCCGTTTCCTGACAACCAACCCACAAGAACCCTAATTGAATTTTTTTGCTCAAATCCAGAAAGAAAGATCGAGAAGGTTTTCTTTAATTTAT
>Marker45775
CTCTCCAAAAACCCAGACCTCCACTCCGCTTCCCTCGACTCAATCCACGTTATCATCTCCTTCCTCCACTCAAAAGGCATCCACCACAAGGACTTCCCTCXXXXXXXXXXATACGATCGGGTTCCAACAGCGGCAATTGGAAACCCTAATTTACACCGATCCGGTTCTGTTAGTCTCCAGCGTGGAGAATACTCTGGTTCCTAAACTCAA
CTCTCCAAAAACCCAGACCTCCACTCCGCTTCCCTCGACTCAATCCACGTCATCATCTCCTTCCTCCACTCAAAAGGCATCCACCACAAGGACTTCCCTCXXXXXXXXXXATACGATCGGGTTCCAACAGCGGCAATTGGAAACCCTAATTTACACCGATCCGGTTCTGTTAGTCTCCAGCGTGGAGAATACTCTGGTTCCTAAACTCAA
>Marker46591
ACCTATAATATGTTTAAGTTGCTAATAACTATCTCTAAGTTGTTAATAATTACATCTACAACTAAGTTATTAATAGGCGTGGCTAAGTTTTTAAAACCTAXXXXXXXXXXTTGCTGCCGCCGTCCCCCTTCCATTTTTTAACTTTCTCTTATAATTTTTTTTTTGTTCTCATTCCATTTCTGATGTTTACTATCTTGCTTGGATGAACTA
ACCTATAATATGTTTAAGTTGCTAATAACTACCTCTAAGTTGTTAATAATTACATCTACAACTAAGTTATTAATAGGTGTGGCTAAGTTTTTAAAACCTAXXXXXXXXXXTTGCTGCCGCCGTCCCCCTTCCATTTTTTAACTTTCTCTTATAATTTTGTTTTTGTTCTCATTCCATTTCTGATGTTTACTATCTTGCTTGGATGAACTA
>Marker47574
GCTTTGTCTTGTGCTGACATTCATAAATTAAGAGGGAACATTCCTTACTCTTTGTCTTTATATCATTAATTTGATTGATGACCCTTGGTTTGTAATCGACXXXXXXXXXXTTTTTTGTTGTATCATTTAATTTCGTTGAAAGAGGATTGATTTACTTAACCTTTTAGCATAATTTTTTGTTGTATCATTTAATTTCATCGCGAATGTTTA
GCTTTGTCTTGTGCTGACATTCATAAATTAAGAGGGAACATTCCTTACTCTTTGTCTTTCTATCATTAATTTGATTGATGACCCTTGGTTTGTAATCGACXXXXXXXXXXTTTTTTGTTGTATCATTTAATTTCGTTGAAAGAGGATTGATTTACTTAACCTTTTAGCATAATTTTTTGTTGTATCATTTAATTTCATCGCGAATGTTTA
>Marker49068
ATCTCTCTGCCAAAAAATACACAGTCTCGAAAATCACAGATGAATCCACATGCTCATGGTTGTAAAGCTCACCCAAGAAACGCATATGTGCAATGCGTCTXXXXXXXXXXAAACAATAATGACTATTCCACTCTGCTCCAAACCCAGCCAATGACTCATTTGATTAGAAAACCTGAATCATCCTCCTGATGCAAATAGTTCACCTAATTA
ATCTCTCTGCCAAAAAATACAGAGTCTCGAAAATCACAGATGAATCCACATGTTCATGGTTGTAAAGCTCACCCAAGAAACGCATATGTGCAATGCGTCTXXXXXXXXXXAAACAATAATGACTATTCCACTCTGCTCCAAACCCAGCCAATGACTCATTTGATTAGAAAACCTGAATCATCCTCCTGATGCAAATAGTTCACCTAATTA
>Marker49169
CAGGCTGTTTTATTTTATTTGGGCTTCATAGTGTCCTACCCAAAACATCTGGGCTTGATACTGCTCTTTAGGCACGGATTGGATGAGCAGCTAGGGCTACXXXXXXXXXXCACATGTTTGGCACGAACGTCCCAGTTTTGAATTAGGGTCTTTGATATTTCGTCATCTTTAACACATTAATGTTGTTCTTTGGTTTACTTCGTAGTGTTT
CAGGCTGTTTTATTTTATTTGGGCTTCATAGTGTCCTACCCAAAACATCTGGGCTTGATACTGCTCTTTAGGCACGGATTGGATGAGCAGCTAGGGCTACXXXXXXXXXXCACATGTTTGGCACGAACGTCCCGGTTTTGAATTAGGGTCTTTGATATTTCGTCATCTTTAACACATTAATGTTGTTCTTTGGTTTACTTCGTAGTGTTT
>Marker49386
TGAATGAGCTATTGAGTTCCATTCTCGAAATTGGTGTTGCTTGTTCTTCGAACATCCCAGAAAACAGAATTAGTATGAACGAGGTTGTATCAAGGTTTACXXXXXXXXXXATCATGGCAACCCATGAATGATGACATTGTAAAATTCAGAATCGTCCACTAACGGAAATGTTGGTCCTAGCTATGTCCACTAATAGTGAAACAAAAGCTT
TGAATGAGCTATTGAGTTCCATTCTCGAAATTGGTGTTGCTTGTTCTTCGAACATCCCAGAAGACAGAATTAGTATGAACGAGGTTGTATCAAGGTTTACXXXXXXXXXXATCATGGCAACCCATGAATGATGACATTGTAAAATTCAGAATCGTCCACTAACGGAAATGTTGGTCCTAGCTATGTCCACTAATAGTGAAACAAAAGCTT
>Marker49511
TGTAGTGTCCACTGGTCGTATAATTGCTGTGAAATTACACTATCAGCTGTCTTAGTAACTTTTTTTGCTACTAATTTACTCGTCGACTTGCGCACGGCAAXXXXXXXXXXGAAATTGTAAGAGATGACAGTCCAATTTTCTTAACCCAAATATTTGGAAAATTTGAAGTGTGCATACGCTTTCCAGACGACCAACGTATTTGAATTTGTG
TGTAGTGTCCACTGGTCGTATAATTGCTGTGAAATTACACTATCAGCTGTCTTAGTAACTTTTTTTGCTACTAATTTACTCGTCGACTTGCGCACGACAAXXXXXXXXXXGAAATTGTAAGAGATGACAGTCCAATTTTCTTAACCCAAATATTTGGAAAATTTGAAGTGTGCATACGCTTTCCAGACGACCAACGTATTTGAATTTGTG
>Marker53187
CCAAAGATCGGAGTGAACCAAATCAAATAATTCCAACTTATGTGGAAATCCCGAATGAAACGGTCGTTTGTGAGCTTTAGCTCCAATATAATGAACACAAXXXXXXXXXXATCTTCTTTGCACCAGGCTGAACCGCGAATGATGATGCTCCTACTGAAGTTGAACTCACACCACCAAACTGATCCAAATAAAAGTTTCGTCCATCCTTAT
CCAAAGATCGGAGTGAACCAAATCAAATAATTCCAACTTATGTGAAAATCCCGAATGAAACGGTCGTTTGTGAGCTTTAGCTCCAATATAATGAACACAAXXXXXXXXXXATCTTCTTTGCACCAGGCTGAACCGCGAATGATGATGCTCCTACTGAAGTTGAACTCACACCACCAAACTGATCCAAATAAAAGTTTCGTCCATCCTTAT
>Marker53220
TCGAGATTGCAACAAAAGAGCTCGTGCGAGCTCTAGAACATGTCTGTTTTTCCGTTTGACAACCCCATTCTGTTCAAAAACTCCAGGACAAGACTGTTGAXXXXXXXXXXCCTGAGCTAGTTCAGACTTCAAACGCAATGGAAAAGTCCATGTATATCGAGATGCATGATCAATGAACAAGGTAAGATAATGAAACCAAAGGCGAGAAGT
TCGGGATTGCAACAAAAGAGCTCGTGCGAGCTCTAGAACATGTCTGTTTTTCCGTTTGACAACCCCATTCTGTTCAAAAACTCCAGGACAAGACTGTCGAXXXXXXXXXXCCTGAGCTAGTTCAGACTTCAAACGCAATGGAAAAGTCCATATATATCGAGATGCATGATCAATGAACAAGGTAAGATAATGAAATCAAAGGCGAGAAGT
>Marker53866
TGCTTTTTGTATATTAGATCGAACTTTTTATATGAACGAAGCCAATTTAGTTATATTGATTTGTATATGATTTGTTAGTGTTGCAGATATACTAGATTTAXXXXXXXXXXATATTTAAGCTAACAATGGACTCAAAGCCATTGTTAGAATTTATCCTAACAGCAGATTAGTGGTCGTTGTTAGACTGGAGAAACTAACTGTGGGGCTTTA
TGCTTTTTGTATATTAGATCGAACTTTTTATATGAACGAAGCCAATTTAGTTATATTGATTTGTATATGATTTGTTAGTGTTGCAGATATACTAGATTTAXXXXXXXXXXATATTTAAGCTAACAATGGACTCAAAGCCATTGTTAGAATTTATCCTAACAGCAGATTAGTGGTCGTTGTTAGACTAGAGAGTCTAACTGTGGGGCTTTA
>Marker55572
CTTAAAACAGCTTTAATTAAGTGACTGTTTTGTTAATTGCATCGATTAAAATGGTCTTTTCCGTAAATTACCAGGAGCTGAAACCAAAAATACCCTACATXXXXXXXXXXGTGGTGCGGCTAGACGCGAGGCTGCCATAGACGCCGAAGCTTTGGAATTGAGATCTACCACTTCGGGCTCCGAGAAAACTTAGCAACTGGTCCAGGGTTG
CTTAAAACAGCTTTAATTAAGTGACTGTTTTGTTAATTGCATCGATTAAAATGGTCTTTTCCGTATAGCTGAAACCAAAAATACCCTACATGGGATTCGAXXXXXXXXXXGTGGTGCGGCTAGACACGAGGCTGCCATAGATGCCGAAGCTTTGGAATTGAGATCTACCACTTCGGGCTCCGAGAAAACTTAGCAACTGGTCCAGGGTTG
>Marker55582
TTGGGTTTCGCATACCACTATACGAAGACAGATATCGAGTGATGCCAGAGACGTAAAGGCGTATTTGGCGGAGGCGACACCATCTCTGACATTGCTTCTCXXXXXXXXXXTGATTTCTGGAGGAGAGAAGTTTAAAATCAAGGCAAATAAGTTCCAGGATTTGTGACAGGAGGGGTATTTTTGATATTTTAAACATATGTATACATTCCA
TTGGGTTTCGCATACCACTATACGAAGACAGATATCGAGTGATGCCAGAGACGTGAAGGCGTTTTTGGCGGAGGCGACACCATCTCCGACATTGCTTCTCXXXXXXXXXXTGATTTCTGGAGGAGAGAAGTTTAAAATCAAGGCAAATAAGTTCCAGGATTTGTGACAGGAGGGGTATTTTTGGTATTTTAAACATATGTATACATTCCA
>Marker55875
TGTTGGATCTAGTAAGTCATTTATAATCTGAAATGAGAAGCGAAAATGAGAAACCAATCAGTGGGCAGATATGAATTGAATAATGTCAGGAAGGAACACAXXXXXXXXXXAGACATAAATCACTGCCGGGAGCATCTAGTAACACTGCTCGTTCCCATACATCCCTAAAGTTTCATGAGGCAATTGGCATCCCACGCATGGCTTGTGTTT
TGTTGGATCTAGTAAGTCATTTATAATCTGAAATGAGAAGCGAAAATGAGAAACCAATCAGTGGGCAGATATGAATTGAATAATATCAGGAAGGAACACAXXXXXXXXXXAGACATAAATCACTGCCGGGAGCATCTAGTAACACTGCTCGTTCCCATACATCCCTAAAGTTTCATGAGGCAATTGGCATCCCACGCATGGCTTGTGTTT
>Marker56070
ATCGATTACTATCGACGATAAACACACTAAGACGAAAGTATACAGATGATAATCGAACAACAGCAGATAATATATAAGTAGTAGTTACGACGAAAACGTCXXXXXXXXXXTTCGGACAAGGTGGACTTCAGTTCCCCGTTGCTTCGGAGTTCCAAGATAATATCACATCCTCCTACAAGCTGCCCCTTGTAATACAGTTGGGGAAAAGTC
ATCGATTACTATCGACGATAAACACGCTAAGACGAAAGTATACAGATGATAATCGAACAACAGCAGATAATATATAAGCAGTAGTTACGACGAAAACGTCXXXXXXXXXXTTCGGACAAGGTGGACTTCAGTTCCCCGTTGCTTCGGAGTTCCAAGATAATATCACATCCTCCTACAAGCTGCCCCTTGTAATACAGTTGGGGAAAAGTC
>Marker56209
TCGAGTTCTTTATATAAGAGAATCTAATGTCACCCTTTCCTCCGCCGCAGGTTCCTTAGTCCTTGAAAGCTTAGGAAGATGGAAGGAACCAAAAGAGGAAXXXXXXXXXXAATGATTTTAGTTCATCCATCCATCCTTATGCACTCAACTGTTCTTGCTGTTTCTGCTACTTTTTCTTTGTGTGCAGAAACTTCATGTTTGGAGAAGTAA
TCGAGTTCTTTATATAAGAGAATCTAATGTCACCCTTTCCTCCGCCGCAGGTTCCTTAGTCCTTGAAAGCTTAGGAAGATGGAAGGAACCAAAAGAGGAAXXXXXXXXXXAATGATTTTAGTTCATCCATCCATCCTTATGCACTCAACTGTTCTTGCTGTTTCTGCTACTTTTTCTTTGTGTGCAGAAACCTCATGTTTGGAGAAGTAA
>Marker57199
GCTACCAAAACTTGAAGTTGGGCTAGGCGGCGTGGGAAGCATCATAGCACCCCGCCTACCACGTCATCCTCTAAAATTCATCCTGAAACCCTTGGGATGCXXXXXXXXXXCAGACGGAAGAAGTTGAATTTGTGGTTGGTGGTTACCCACAAGATCGGCAAAACTTTGGTCAAAATGAGAACTCACACTTGTGACCTTAAGACAACTCTA
GCTACCAAAACTTGAAGTTGGGCTAGGCGGCGTGGGAAGCATCATAGCACCCCGCCTACCACGTCATCCTCTAAATTTCATCCTGAAACCCTTGGGATGCXXXXXXXXXXCAGACGGAAGAAGTTGAATTTGTGGTTGGTGGTTACCCACAAGATCGGCAAAACTTTGGTCAAAATGAGAACTCACACTTGTGACCTTAAGACAACTCTA
>Marker58184
CAAAAAAACTACAAAGCTGAGTTGGTGCGAATACCTGAAACTAAAGGTCGGACCGGACTTCAAAAAAGTTGACCTTTCCATCAAATCAAATTGGTTCGTTXXXXXXXXXXTTTCGAATCCTTGTAAATATAAAAATCTCAATCTTTTTCTCTACAATAACAGAAATTTCAAGTAGAAATCACCAACATAACATAAGGGAAAATGAAGATA
CAAAAAAACTACAAAGCTGAGTTGGTGCGAATACCTGAAACTAAAGGTCGGACCGGACTTCAAAAAAGTTGACCTTTCCATCAAATCAAATTGGTTCGTTXXXXXXXXXXTTTCGAATCCTTGTAAATATAAAAATCTCAATCTTTTTCTCTACAAGAACAGAAATTTCAAGTAGAAATCACCAACATAACATAAGGGAAAATGAAGATA
>Marker60014
AGTAAGAGAGAAATTCGAATATTATACACTAATGAAGGGAGGACAAGGAAGCGGCGGGAAGCAGAAGGGTCCCCATGGCAAGAGCTGCAGGAATTCCATCXXXXXXXXXXTACAAACAGAAACAACTACCCTAAACAATTTCTTAATCAAAATATAACAAAGGTGATCAATTTCGAAAATGAAACCTAAGCATGCAGATCTTAATGAAGA
AGTAAGAGAGAAATTCGATTATTATACACTAATGAAGGGAGGACAAGGAAGCGGCGGGAAGCAGAAGGGTCCCCATGGCAAGAGCTGCAGGAATTCCATCXXXXXXXXXXTACAAACAGAAACAACTACCCTAAACAATTTCTTAATCAAAATATAACAAAGGTGATCAATTTCGAAAATGAAACCTAAGCATGCAGATCTTAATGAAGA
>Marker60053
ATGCCTTATGTTTATCCAATGTGTTCTTTTGGACAGTAACGTTTGATTGTATTCTATGGATGGTAATAAACCTGTAATTTATAGCTTTTTAGCTAATCGAXXXXXXXXXXTCATGAACGTTAACATGATACAATCTAGATTCTAGTCTCTAAACATAACTAGTAGGTTCTTTATCACCCAATAGGTATGGCGAGGTTGATGGCGTTATCC
ATGCCTTATGTTTATCTAATGTGTTCTTTTGGACAGTAACGTTTGATTGTATTCTATGGATGGTAATAAACCTGTAATTTATAGCTTTTTAGCTAATCGAXXXXXXXXXXTCATGAACGTTAACATGATACAATCTAGATTCTAGTCTCTAAACATAACTAGTAGGTTCTTTATCACCCAATAGGTATGGCGAGGTTGATGGCGTTATCC
>Marker60063
TGCTGGTTTGTCCTTCTTCTCCCCTCACTCTTGCCTCTTGTTGCTGGTTTGTCCTTCTTTCTCTGTAATGTCAGGTTAGAATTGAATGGATGGTTTTCTAXXXXXXXXXXTGTTTAGTAACACTTCTACAATCTGTTTGATTGTTGCCAACTTTTTTTCAGTAATGGCAAGAAAGAGGAAGGATGAGGTTGATGGCGAATCAGGACGAAA
TGCTGGTTTGTCCTTCTTCTCCCCTCACTCTTGCCTCTTGTTGCTGGTTTGTCCTTCTTTCTCTGTAATGTCAGGTTAGAATTGAATGGATGGTTTTCTAXXXXXXXXXXTGTTTAGTAACACTTCTACACTCTGTTTGATTGTTGCCAACTTTTTTTCAGTAATGGCAAGAAAGAGGAAGGATGAGGTTGATGGCGAATCAGGACGAAA
>Marker60072
AACACATAAAGATAGATATTAACAGTTTTGCACTGGAGAAGAGAAATAAATGAGCAAGTATATCTGCAGAAGTGTCCTCTCGAAAGCTTTAGGCATAGTGXXXXXXXXXXTTTGCTGTAATGAATGACAAGCAGAATGATTCAGACTCGGTAAACCAACCACATTCGATTTTGGCTGAAGAAAACAGATTCTAGGGAAGCAATATAACAT
AACACACAAAGATAGATATTAACAGTTTTGCACTGGAGAAGAGAAATAAATGAGCAAGTATATCTGCAGAAGTGTCCTCTCGAAAGCTTTAGGCATAGTGXXXXXXXXXXTTTGCTGTAATGAATGACAAGCAGAATGATTCAGACTCGGTAAACCAACCACATTCGATTTTGGCTGAAGAAAACAGATTCTAGGGAAGCAATATAACAT
>Marker60080
TGGCTGTCTGGTTCACCTGACTGAAAACCACTCACTCGTGTCTCTCTCTCTCTCTGCTTCCGGGAGGAAAACAGTCCAACAAAATTGAATAGAGAGAATTXXXXXXXXXXTGAGATGCTTTACTGACCCAACTTTCTGGTTTCTCCCATTGCAGAGAAGACCAACTTGGGAATTCGTTCAATCTTCAGTGCCTGCCTTGTTCGATTAAAG
TGGCTGTCTGGTTCACCTGACTGAAAACCACTCACTCGTGTCTCTCTCTTTCTCTCTGCTTCCGGGAGGAAACCAGTCCAACAAAATTGAATAGAGAGAAXXXXXXXXXXTGAGATGCTTTACTGACCCAACTTTCTGGTTTCTCCCATTGCAGAGAAGACCAACTTGGGAATTCGTTCAATCTTCAGTGCCTGCCTTGTTCGATTAAAG
>Marker60299
GTCAAATCCAAGTGCCTTCCCTGCTTGCCCGTAGTTGTAGTTCCTGCAAACATAACATGTCAATTAAGTTAGTTAGAATTGTAAACTCGGGATGAAATCAXXXXXXXXXXTTTAAACAATTCGGACACACAACTGTTCGAAATAGAAAAAAAAACTTACCAAGACAATTGGATGGGTCCTCTTCCTTTGTAGGACTTGCCAGGAACACAT
GTCAAATCCAAGTGCCTTCCCTGCTTGCCCGTAATTGTAGTTCCTGCAAACATAACATGTCAATTAAGTTGGTTAGAATTGTAAACTCGGGATGAAATCAXXXXXXXXXXTTTAAACAATTCGGACACACAACTGTTCGAAATAGAAAAAAAAACTTACCAAGACAATTGGATGGGTCCTCTTCCTTTGTAGGACTTGCCAGGAACACAT
>Marker60399
TGAGCAGTGGGTTGGGTGGGTGGATTGGGAAGGATTGACTGCAAAATCAACTCATATGCTAATATGTCAGGTTGATGTTTTTACGACCTATACGTAACCAXXXXXXXXXXGCTACATCTACGGTAGATCCGACAATGATTAAGTTTTAATAATTTTGAAGAAAAATAACTAAATGAGAAGTCGAAAAGATCTCAATAATTGTGTTGGAAC
TGAGCAGTGGGTTGGGTGGGTGGATTGGGAAGGATTGACTGCAAAATCAACTCATATGCTAATATGTCAGGTTGATGTTTTTACGACCTATACGTAACCAXXXXXXXXXXGCTACATCTACGGTAGATCCGATAATGATTAAGTTTTAATAATTTTGAAGAAAAATAACTAAATGAGAAGTCGAAAAGATCTCAATAATTGTGTTGGAAC
>Marker60402
GATCAATCAAAGAATGAACTAGATAATCGCTTAATGACTAATGGTTCGGCACAATGCTCACCCCTAATCAAAATCAAAGGTTAAGATAACCGCTTAAAGAXXXXXXXXXXGGTCCTTCCAAATGTTTCTTTCCAAAATTTGATCCAACGGTGTGTGATGATCCATACCTGTTTTCCCTAATACGCCCAATAATAATAATAAATTATTCGT
GATAATCAAAGAATGAACTAGATAATCGCTTAATGACTAATGGTTCGGCACAATGCTCACCCCTAATCAAAATCAAAGGTTAAGATAACCGCTTAAGGACXXXXXXXXXXGGTCCTTCCAAATGTTTCTTTCCAAAATTTGATCCAACGGTGTGTGATGATCCATACCTATTTTCCCTAATACGCCCAATAATAATAATAAATTATTCGT
>Marker61414
CAACCGAACAACGGGACGAAACGGTGAACGAGGGAAGGGCAGCCCGCGCGCGTCAAGCCGGTCGAACCGGTTACCCACGGTTCGACTAGACGCCTGAAAGXXXXXXXXXXTCACCTCCACTCTCTCTCTCTCTTCCTCTCCTATTTAAAAATGCTCTGACTTCTCTCTACTTTCTCTCTACCTTCTCTCCTTCCTCCTCTTCTTCCTCTC
CAACCGAACAACAGGACGAAACGGTGAACGAGGGAAGGGCAGCCCGCGCGCGTCAAGCCGGTCGAACCGGTTACCCACGGTTCGACTAGACGCCTGAAAGXXXXXXXXXXTCACCTCCACTCTCTCTCTCTCTTCCTCTCCTATTTAAAAATGCTCTGACTTCTCTCTACTTTCTCTCTACCTTCTCTCCTTCCTCCTCTTCTTCCTCTC
>Marker62705
TACCTTTGAAATTTTGCAGATTGCATGCGTGAAGTAAGCGGCTTAGTAATAACCCACCAAATTTACAGTTAGAAGAAATTTAAGGCGACGATTCAGCGGCXXXXXXXXXXTGCGTGAAGTAAGCGGCTTAGTAATAACCCACCAAATTTACAGTTAGAAGAAATTTAAGGCGACGATTCAGCGGCGGATCTAACACATATTAGAGCACTA
TACCTTTGAAATTTTGCAGATTGCATGTGTGAAGTAAGCGGCTTAGTAATAACCCACCAAATTTACAGTTAGAAGAAATTTAAGGCGACGATTCAGCGACXXXXXXXXXXTGTGTGAAGTAAGCGGCTTAGTAATAACCCACCAAATTTACAGTTAGAAGAAATTTAAGGCGACGATTCAGCGACGGATCTAACACATATTAGAGCACTA
>Marker62889
ATATCCTTTTTGTTCACTCGAGTTTTCTAGCAAATGAGGACTTGACAAAAAGAAAGCAAAGATCTTTCTAGCAAACAGACATTAACCAGCAATACCCACCXXXXXXXXXXATACCCACCTTAATCTTCCCATATTTATGGTGTTGGCTTGTTAAGGTTTTAATCAGAGGAATGAATGGGGACGGAATTTGAGACTTCCAACTGAATTAAG
ATATCCTTTTTGTTCACTCGAGTTTTCTAGCAAATGAGGACTTGACAAAAAGAAAGCAAAGATCTTTCTAGCAAACAGACATTAACCAGCAAGACCCACCXXXXXXXXXXAGACCCACCTTAATCTTCCCATATTTATGGTATTGGCTTGTTAAGGTTTTAATCAGAGGAATGAATGGGGACGGAATTTGAGACTTCCAACTGAATTAAG
>Marker64932
TAGAACTATCCAGCCAAATAATTATCATTCAAAGACTTAATTCCTCTTCCGATTGACGTAGTCAACTCGATAACTATCCTGAGTCTTGCAAGCCTTTAATXXXXXXXXXXACCTCTCATCGGCCTCCCAGACGGAGCCCTACCCTGTTGTATTGTCAACTCTGACACTGCTGGTTTGCCCGACTCCGACACTGTTGGTTTTCCCGACTCG
TAGAACTATCCAGCCAAATAATTATCATTCAAAGACTTAATTCCTCTTCCGATTGACGTAGTCAACTCGATAACTATCCCGAGTCTTGCAAGCCTTTAATXXXXXXXXXXACCTCTCATCGGCCTCCCAGACGGAGCCCTACCCTGTTGTATTGTCAACTCTGACACTGCTGGTTTGCCCGACTCCGACACTGTTGGTTTTCCCGACTCG
>Marker66359
TACTTCCGCTCAAAGTAGACTTGTTGTCGTCGGAGGCGGAAGATGAATCGTTGAACGGCGTAGTAGATGGAGGAGGAGGAGTAGGACCAGCACTTCCACTXXXXXXXXXXTTTGGATGTTTTATAATCAAATATAATCATGGTATTAAATTTATCATAAAATTGATTCCCTAATATATCGGTTACGATGAATAAAAAATCAATTGATGGA
TACTTCCGCTCAAAGTAGACTTGTTGTCGTCGGAGGCGGAAGATGAATCGTTGAACGGCGTAGTAGATGGAGGAGGAGGAGTAGGACCAGCACTTCCACTXXXXXXXXXXTTTGGATGTTTTATAATCAAATATAATCATGGTATTAAATTTATCATAAAATTGATTCCCTAATATATCGGTTACGATGAATAAAAAATTAATTGATGGA
>Marker66495
TTTCATTTGAACTCTTTTTCCTTATCGTAATGCTAGGTTCAAATTTCTATCAAGAATATGGATCAATTCTCCTTTTGTAATTTGACTGCAATTTGTTGTTXXXXXXXXXXTTTTTCCTTGTGCTCCTAGCTTCGATATTTGTTCGAGCGTAATAATATGAATCATTTCCCCTTTCTTTTTTTCCTTTAATCAATTATCTAATTTACGTTC
TTTCATTTGAACTCTTTTTCCTTATCGTAATGCTAGGTTCAAATTTTTATCAAGAATATGGATCAATTCTCCTTTTGTAATTTGACTGCAATTTGTTGTTXXXXXXXXXXTTTTTCCTTGTGCTCCTAGCTTCGATATTTGTTCGAGCGTAATAATATGAATCATTTCCCCTTTCTTTTTTTCCTTTAATCAATTATCTAATTTACGTTC
>Marker68671
TTGAGATTCTGAGGGGAGCTAAGTTCATATCCATTATTTTTTGGGTAGCTTTGTATGATGGAGGAGGTGGAACAGAAAGTTGAAGAGGTTAAGAAGATAGXXXXXXXXXXAAATTTTTCTATAATAATTTATTGTCCTAAAAATATTATATTTCAAAATTAGCTATTCGAGATTGCTTATTATAGAAACGGTAAGCTAACTTCATTTAGG
TTGAGATTCTGAGGGGAGCTAAGTTCATATCCATTATTTTTTGGGTAGCTTTGTATGATGGAGGAGGTGGAACAGAAAGTTGAAGAGGTTAAGGAGATAGXXXXXXXXXXAAATTTTTCTATAATAATTTATTGTCCTAAAAATATTATATTTCAAAATTAGCTATTCGAGATTGCTTATTATAGAAACGGTAAGCTAACTTCATTTAGG
>Marker70043
CTTTAGCGTCTAAGCTGAGAGAGGATATTTTAGACAAGGCACAGTCATCTGCTTATGTTATGCATCCAGGTGAGACAAAGATGTATCGAAAACTCCGTCCXXXXXXXXXXCAATGGGAAAGATGCAGTTTGGGTGAAAATGGATCGATTGACCAAGGTAGCTCATTTCATTCCCATCTGGTTTAAGCCAGATGTGGAGTTTGGTAGGTTT
CTTTAGCGTCCAAGCTGAGAGAGGATATTTTAGACAAGGCACAGTCATCTGCTTATGTTATGCATCCAGGTGAGACAAAGATGTATCGAAAACTCCGTCCXXXXXXXXXXCAATGGGAAAGATGCAGTTTGGGTGAAAATGGATCGATTGACCAAGGTAGCTCATTTCATTCCCATCTGGTTTAAGCCAGATGTGGAGTTTGGTAGGTTT
>Marker71167
TACGACCGAGTTGAATGGTCCTTTCTAATTGCTCTTTCTCGACACATAGGTTTTAGCGAGAAATGGACCAACTAGATATATACATGCATTTCTATAGGGGXXXXXXXXXXATTCTTACGAGTTTCTATAGAAGAACTCCAAGCATTGTTGGATCTTTTTGCCTAGTATCAACGATTTAGTGGGAAAAGGGTAAATTTAGGAAAATCATCA
TACGACCGAGTTGAATGGTCCTTTCTAATTGCTCTTTCTCGACACATAGGTTTTAGCGAGAAATGGACCAACTAGATATATACATGCATTTCTATAGGGGXXXXXXXXXXATTCTTACGAGTTTCTATAGAAGAACTCCAAGCATTGTTGGATCTTTTTGCCCAGTATCAACGATTTAGTGGGAAAAGGGTAAATTTAGGAAAATCATCA
>Marker74088
TACTGTTCTGATGTGAGACATACATTACTTTTCTCTGCTCTTGTTGTTTGTTGAGCATCAGACAAGTCATTTTGTCCAACTAACTGCTTCAATTATTTCTXXXXXXXXXXTCTGTCGTCCGAAGATGATGAGAATGTTATTATTAATGATCTAGTCTTCAAACTGCAACTTCTTCTGCCCCAGCTTAATCAAACCCACCAGCCTTCAAGG
TACTGTTCTGATGTGAAGACATACATTACTTTTTTCTGCTCTTGTTGTTTGTTGAGCATCAGACAAGTCATTTTGTCCAACTAACTGCTTCTATTATTTCXXXXXXXXXXTCTGTCGTCCGAAGATGATGAGAATATTATTATTAATGATCTAGTCTTCAAACTGCAACTTCTTCTGCCCCAGCTTAATCAAACCCACCAGCCTTCAAGG
>Marker76063
TGGAATATGAAGCATCTTAACATGCTTTTCATAGTTTAAAGAGTTTTCATTTATATGTATGGATTGCAATGTGGATGTTCCTTGATCTGCATTTTCTTCTXXXXXXXXXXATTGTAACCTTTCTTGTAGAAGGGTAATGTTAAGTTGCAGTGAATTTCGTTTGATTGAAATGGACGCTATTTTCGCTGAAAAGAAATCGTTCACGTGACA
TGGAATATGAAGCATCTTAACATGCTTTTCGTAGTTTAAAGAGTTTTCATTTATATGTATGGATTGCAATGTGGATGTTCCTTGATCTGCATTTTCTTCTXXXXXXXXXXATTGTAACCTTTCTTGTAGAAGGGTAATGTTAAGTTGCAGTGAATTTCGTTTGATTGAAATGGACGCTATTTTCGCTGAAAAGAAATCGTTCACGTGACA
>Marker76154
TCATTATGGCTTGCAGGTTGGTTACTAGTGGTTTAGTCATCTTCCAGTTATCTCAGTTTGCATATGTCGCCTTCACGTTGATTTTCTTGAAATGTCAGTTXXXXXXXXXXATGGCTTTTTCTTAATTACTTGACTTGCTTTGAAGATACTGAATATCGGCTCCACATCTTAATGGAGTTCATGTATAATATCCAGTGAAACAGTGCAGAA
TCATTATGGCTTGCAGGTTGGTTACTAGTGGTTTAGTCATCTTCCAGTTATCTCAGTTTGCATATGTCGCCTTCACGTTGATTTTCTTGAAATGTCAGTTXXXXXXXXXXATGGCTTTTTCTTAATTACTTGACTTGCTTTGAAGATACTGAATATCGGCTCCACATCTTAATGGAGTTCATGTATCATATCCAGTGAAACAGTGCAGAA
>Marker76582
CAGAAAAAAATGGAACTATACAGATTACAAACAAAACGCAAGAAATATACGCACCATCTGCATTAAGCCATTTGCCGAACCACAAAACAGAGGTATCACAXXXXXXXXXXAATACACCTTTAGACGATTTTGAAATGGGGAGAATACTTCATTGCTTTTCACCCCGCATGAACTCCGCCATCTCATTGTGAAATGGACCATAGACGGAAA
CAGAAAAAAATGGAACTATACAGATTACAAACAAAACGCAAGAAATATACGCACCATCTGCATTAAGCCATTTGCCGAACCACAAAACAGAGGTATCACAXXXXXXXXXXAATACACCTTTAGACGATTTTGAAATGGGGAGAATACTTCATTGCTTTTCACCCCGCATGAAATCCGCCATCTCATTGTGAAATGGACCATAGACGGAAA
>Marker76730
AATCCTGAGAAAAGTGAGATTTTTCTTGTTGGTGTTCAAGAAGATGATGATGCATAGTTGATTGATGCTTCTGGGTTTCGTGTTGGAGCTTTACCTTTTTXXXXXXXXXXTATCCTCCAATATTAGATGGCTGTTTTTTTGCTTCCAAAGCGCCTTCTTAAAGATTTTGAGATGCTATGTAATAGATTTCTCTAGGGAAACATGGATGGA
AATCCTGAGAAAAGTGAGATTTTTCTTGTTGGTGTTCAAGAAGATGATGATGCATAGTTGATTGATGCTTCTGGGTTTCGTGTTGGAGCTTTACCCTTTTXXXXXXXXXXTATCCTCCAATATTAGATGGCTGTTTTTTTGCTTCCAAAGCGCCTTCTTAAAGATTTTGAGATGCTATGTAATAGATTTCTCTAGGGAAACATGGATGGA
>Marker77177
ATGCGAAATATTGTCATGGTAAGAATTCTAGTAATTTTTTGAGTGCGTTAACGAGCACAATTTAAAAAGATCATAAATCTGGATGGACTTCTTTTAACGAXXXXXXXXXXACAGAAATTTTATTGCTGATAGCAATTTGTAAATGGTGGATTCGATGTCAGGATTCAGCTGGAAATCTTGGTAGACATGAAAAGTTGAATGAAATTTTGA
ATGCGAAATATTGTCATGGTAAGAATTCTAGTAATTTTTTGAGTGCGTTAACGAGCACAATTTAAAAAGATCATAAATCTGGATGGACTTCTTTTAACGAXXXXXXXXXXACAGAAATTTTATTGCTGATAGCAATTTGTAAATGGTGGATTCGATGTCAGGATTCAGCTGAAAGTTTTGGTAGACATGAAAAATTAAATGAAATTTTGA
>Marker78231
TGGTGAGATTTGATTAATTTTGTGGGTTAAGTTACTCTGCCGAGGAAGTAGTAACGTAGATGGTGACGACCAAGGACGAGGAGTTGTCACTGTTCTTCGAXXXXXXXXXXGAGGCGGGGTTGCACCATTGATTCAGCAGATGGCGCCACTCTTTAAAAATGCAGCTGAAAAATTCTTGGATTCGGAGAATGAAAAATCGGATTATGATTG
TGGTGAGATTTGATTAATTTTGTGGGTTAAGTTACTCTGCCGAGGAAGTAGTAACGTAGATGGTGACGACCAAGGACGAGGAGTTGTCACTGTTCTTCGAXXXXXXXXXXGAGGCGGGGTTGCACCATTGATTCAGCAGATGGCGCCACTCTATAAAAATGCAGCTGAAAAATTCTTGGATTCGGAGAATGAAAAATCGGATTATGATTG
>Marker80562
TGTTTCTATTACTAATTAGGGAGCTGCCACCTCCCTTTGGTGTCAGATGGTGTTGTAGACTTTTGGTTGGTTTAGAGGGGAGGTGACAGCTATTTCTGCCXXXXXXXXXXAATCCTCCCCAAAAAAAGAAACCCCCAATACAATAAACAAACACTTCTATAAGATCCCAAATAATAATAAAGATTACAAAAAAACACAAAAAACTAAAAA
TGTTTCTATTACTAATTAGGGAGCTGCCACCTCCCTTTGGTGTCAGATGGTGTTGTAGACTTTTGGTTGGTTTAGAGGGGAGGTGACAACTATTTCTGCCXXXXXXXXXXAATCCTCCCCAAAAAAAGAAACCCCCAATACAATAAACAAACACTTCTATAAGATCCCAAATAATAATAAAGATTACAAAAAAACACAAAAAACTAAAAA
>Marker85067
GCCTCTCATCATCAGACACATATCAACCACATATCAACTTGCCGACTCATCCATAAGACCACTACAAGCAGCACGCTTCACTACTACGAAACAAGATACTXXXXXXXXXXACAATATCTCACTAAAAACTAGCGATACGAGAATAGTGCCGATGTGTGAGCTTACTGTCTCCCGTAGAAACTGATTTAACTACTACACCTATACCTTTTG
GCCTCTCATCATCAGACACATATCAACCACATATCAACTTGCCGACTCATCCATAAGACCACTACAAGCAGCACGCTTCACTACTACGAAACAAGATACTXXXXXXXXXXACAATATCTCACTAAAAACTAGCGATATGAGAATAGTGCCGATGTGTGAGCTCACTGTCTCCCGTAGAAACTGATTTAACTACTACACCTATACCTTTTG
>Marker88382
TGAAGAAAGGCTTCTCGAGTGTAGAATGTCTTTCCGACACAAGTGTTGAATGCCTGGTTGCGAATGCAGTTGAAGAACTCTGGAGTGACGATGTTGGCTAXXXXXXXXXXGCTATTTAAAGAAGTGGATGGATCAATGTAGATATGCAGTTGTTCAATTAGATCATGATGAATGAGAGTTAGTGATCCCTTGGGAATTTTAATTTGACGA
TGAAGAAAGGCTTCTCGAGTGTAGAATGTCTTTCCAACACAAGTGTTGGATGCCTGGTTGCGAATGCAGTTGAAGAACTCTGGAGTGACGATGTTGGCTAXXXXXXXXXXGCTATTTAAAGAAGTGGATGGATCAATGTAGATATGCAGTTGTTCAATTAGATCATGATGAATGAGAGTTAGTGATCCCTTGGGAATTTTAATTTGACGA
>Marker89685
AACGTGTTGATGGCGAGAAGTATTGGAATTCCGAGAGGGTCAACCCGTGATCAGCTCAAGCGAGATGAACATCCCTTTGGAAACGCATATTGTATCAACAXXXXXXXXXXAAATCACTGGCGACAGAATTTTTCAGTGACTTGTTTCGACATCGGAAGGGCTCCTAGCAGCGAGGGAGATCTGCAGGAGGATGGGGAAGTGTCTCTAAGT
AACATGTTGATGGCGAGAAGTATTGGAATTCCGAGAGGGTCAACCCGTGATCAGCTCAAGCGAGATGAACATCCCTTTGGAAACGCATATTGTATCAACAXXXXXXXXXXAAATCACTGGCGACAGAATTTTTCAGTGACTTGTTTCGACATCGGAAGGGCTCCTAGCAGCGAGGGAGATCTGCAGGAGGATGGGGAAGTGTCTCTAAGT
>Marker91983
ATGATTTTAGTTTGTTTTTCTGGATCTCTTGAAACAAACAACCCAAATGACGAACATGAACTGCTTGCTGAATAAATTATTGATCGAAACTTTCTTTGGTXXXXXXXXXXCCAGATCATTTATCACTTAGGAACGCCAAAACCCGGTATCAAGGCTTTTATGTTTCTTGCCATGTCTCTTATGTTCGTCCAACAAACCATCCCAAAACAA
ATGATTTTAGTTTGTTTTTCTGGATCTCTTGAAACAAACAACCCAAATGATGAACATGAACTGCTTGCTGAATAAATTATTGATCGAAACTTTCTTTGGTXXXXXXXXXXCCAGATCATTTATCACTTAGGAACGCCAAAACCCGGTATCAAGGCTTTTATGTTTCTTGCCATGTCTCTTATGTTCGTCCAACAAACCATCCCAAAACAA
>Marker92144
TCCGCAAGCCAAAGCTTAAATGCATCTGGTGTATACTCCAACAAAATTTGGGCAGCCATTAGTCCTGAATCTATTTACGAGGAGACTGGTTTTCATCTTGXXXXXXXXXXCATCAAGGAGTAGTGCCGCTCCAAATATTACAAGATCTCGATGATGGTTAAAACCAACAACGACGACTGCAAAGATTTCAATTGATATAGCTTTGTAAGA
TCCGCAAGCCAAAGCTTAAATGCATCTGGTGTATACTCCAACAAAATTTGGGCAGCCATTAGTCCTGAATCTATTTACGAGGCGACTGGTTTTCATCTTGXXXXXXXXXXCATCAAGGAGTAGTGCCACTCCAAATATTACAAGATCTCGGTGATGGTTAAAACCAACAACGACGACTGCAAAGATTTCAATTGATATAACTCTGTAAGA
>Marker100685
TGAGTTTGTGACCCAGTGCCCTATCCGTCCTAGAGGCAGCTACACTTATCGGTTTACTGTCCGTGGTCAGGAAGGGACTCTCTGGTGGCACGCTCATAGCXXXXXXXXXXATGTGTAGGGGAATGGTGGAATGCAAATCCGATTGATGTTCAAAGAGAATCGATCCGAACCGGTGGGGCTCCAAACATTTCAGATGCTTATACTATCAAC
TGAGTTTGTGACCCAGTGCCCTATCCGTCCTGGAGGCAGCTACACTTACCGGTTTACTGTCCGTGGTCAGGAAGGGACTCTCTGGTGGCACGCTCATAGCXXXXXXXXXXATGTGTAGGGGAATGGTGGAATGCAAATCCGATTGATGTTCAAAGAGAATCGATCCGAACCGGTGGGGCTCCAAACATTTCAGATGCTTATACTATCAAC
>Marker101923
TTCATCCATGCCAATGGCGCTGACCACTTTACCCGCATTTCTACAGCCCTAGCGTATGTCTATACTCCCCCCTCTGCTTCAATTTCTCTATATCCAAATTXXXXXXXXXXAATCATAGGGGAAAATGAGATGGAAGGAGGTAATGACGAAGTAGAATGCGAAGCAAATGCGAGCGTTGAGAAGAGTCTTCTTGATGAAAGCTGGAAAGAT
TTCATCCATGCCAATGGCGCTGACCACTTTACCCGCATTTCTACAGCCCTAGCGTATGTCTATACTCCCCCCTCTGCTTCAATTTCTCTATATCCAAATTXXXXXXXXXXCATCATAGGGGAAAATGAGATGGAAGGAGGTAATGACGAAGTAGAATGCGAAGCAAATGCGAGCGTTGAGAAGAGTCTTCTTGATGAAAGCTGGAAAGAT
>Marker104682
CGCTTTCCATTGGGAAGCATTAGAAGGAGGAAGTGGTGTGCGACGATATGAACATAGATGTGTGGCATATTCTCTTGGGTCAACCATGACAGTGTGACAAXXXXXXXXXXATGAGCTTAAGGAGGCCGTCAAAGAGACCAAATGGATTTTCCCAGTGGTGATCAAGTTCTACGGCTATTTTTGGATCACTCTATGGCGGATGTATGGTAA
CGCTTTCCATTGGGAGGCATTAGAAGGAGGAAGTGGTGTGCGACGATATGAACATAGATGTGTGGCATATTCTCTTGGGTCAACCATGACAGTGTGACAAXXXXXXXXXXATGAGCTTAAGGAGGCCGTCAAAGAGACCAAATGGATTTTCCCAGTGGTGATCAAGTTCTACGGCTATTTTTGGATCACTCTATGGCGGATGTATGGTAA
>Marker104693
TTCAAGGAGCCCATATAAAGATTCTTTCCATATACAACTGCTTCAGTATGAGGAAGTTTGCTTTTGTAACTTGACTTTTTAATTTCCCTCTTTGATAATTXXXXXXXXXXAAAAGGTTTATCTGCTACTCGAAGTCATAATACATAACTCATGCACCTATCTCAAATAATATTTTGGTTTGTTTGTTGACATCGTCGAGTTGTATGTTTG
TTCAAGGAGCCCATATAAAGATTCTTTCCATATACAACTGCTTCAGTATGAGGAAGTTTGCTTTTGTAACTTGACTTTTTAAGTTCCCTCTTTGATAATTXXXXXXXXXXAAAAGGTTTATCTGCTACTCGAAGTCATAATACATAACTCATGCACCTATCTCAAATAATATTTTGCTTTGTTTGTTGACATCGTCGAGTTGTATGTTTG
>Marker104697
TCATCTAGCTTTATTGCCCAGTCCTTGAGAGATTGATTAATCCTTTTTTCAAGAATCCACTTAAGCTCACAATTCGTCACTTCCTCCTCACTTCTTGCATXXXXXXXXXXCACTTCCTCCTCACTTCTTGCATGTTGGTGGTAAGCGATGATCAATCGATGAGTTATCCCAATTAGTTCTCAAACTTGTTTCAGAACACTCTGAAAGTTA
TCATCTAGCTTGATTGCCCAGTCCTTGAGAGATTGATTAATCCTTTTTTCAAGAATCCACTTAAGCTCACAATTCGTCACTTCCTCCTCACTTCTTGCATXXXXXXXXXXCACTTCCTCCTCACTTCTTGCATGTTGGTGGTAAGCGATGATCAATCGATGAGTTATCCCAATTAGTTCTCAAACTTGTTTCAGAACACTCTGAAAGTTA
>Marker104730
CAAAAGTCCTCATCGGGCTTTATTGACCAGTCCTTGAGAGATCGATCGATCCTTTTTCAAGAATCCACTTAAGCTCACAATTCGGCAATTCCTTCTGTCTXXXXXXXXXXCAATTCCTTCTGTCTGCTTCCATGTGGGTGGCAAGCGATGATCAATTGATGAGCTAGCGCAATTAGTTTTCAAACTCGTTTGAAAACACTTTGAAAGTGA
CAAAAGTCCTCATCGGGCTTTATTGACCAGTCCTTGAGAGATCGATCGATCCTTTTTCAAGAATCCACTTAAGCTCACAATTCGGCAATTCCTCCTGTCTXXXXXXXXXXCAATTCCTCCTGTCTGCTTCCATGTGGTTGGCAAGCGATGATCAATTGATGAGCTAGCCCAATTAGTTTTCAAACTCGTTTGAAAACACTTTGAAAGTGA
>Marker104738
CGCTTTCCATTGGGAGGCATTAGAAGGAGGAAGTGGTGTGCGACGATATGAACATAGATGTGTGGCATATTCTCTTGGGTCAACCATGACAGTGTGACAAXXXXXXXXXXACAAGATAGCTATGGATCCGGTTTCTTGGTTCAACAAACAACTTGATAAAATGGAGTCCAATTTCCTTGTTAAGAAAAAGGACGAACATGAGCTTAAGGA
CGCTTTCCATTGGGAAGCATTAGAAGGAGGAAGTGGTGTGCGACGATATGAACATAGATGTGTGGCATATTCTCTTGGGTCAACCATGACAGTGTGACAAXXXXXXXXXXACAAGATAGCTATGGATCCGGTTTCTTGGTTCAACAAACAACTTGATAAAATGGAGTCCAATTTCCTTGTTAAGAAAAAGGACGAACATGAGCTTAAGGA
>Marker105933
CCTGGATGATTGTATCAGATGTGGACCCCAGTTTCTCTTCCCACTTTTGGAAGGGTTTGCACGCAACCTTGGGGAATAAGCTGAACTTCTCTACAGCTTAXXXXXXXXXXAATGGAGAGGGAGAGAAGTTGTTAGCTGGACCTCAGATGGTTCAGGAGACAGCCTCACGAGTTAGAGTGATTCGAGCCTAATTGGGTGTGGCTCAGAATT
CCTGGATGATTGTATCAGATGTGGACCCCAGTTTCTCTTCCCACTTTTGGAAAGGTTTGCACGCAACCTTGGGGAATAAGCTGAACTTCTCTACAGCTTAXXXXXXXXXXAATGGAGAGGGAGAGAAGTTGTTAGCTGGACCTCAGATGGTTCAGGAGACAGCCTCACGAGTTAGAGTGATTCGAGCCTAATTGGGTGTGGCTCAGAATT
>Marker105986
AAGGCAATGTGGTGTCAAACTTTATATGATGTCAGTTCCAAGGCAAAAGCTTACCACTTTCTGACGCTTTGCTGTATTATATTAATTTGAATAATGATGAXXXXXXXXXXCTTTCTCTTTCATCCATGGCTATGAAAGTTTCACAGGGTAAGTCATTTCTTCTTCTGCTTCCTATTTTGCCTTTTGTCAACACTGTGCTTGAATTGACTG
AAGGCAATGTGGTGTCAAACTTTATATGATGTCAGTTCCAAGGCAAAAGCTTACCACTTTCTGACGCTTTGCTGTATTATATTAATTTGAATAATGATGAXXXXXXXXXXCTTTCTCTTTCATCCATGGCTATGAAAGTCTCACAGGGTAAGTCATTTCTTCTTCTGCTTCCTATTTTGCCTTTTGTCAACACTGTGCTTGAATTGACTG
>Marker106121
TGAAGTTTTTCTACGACATCGATAGGGATGGCTTTCGAAGCAGTGAATGAACAAATAGCCAAAGGAACAGGAACAGAGTTTGCAACAACAAGCTGTCTGTXXXXXXXXXXAAACTTAAGTGCTTCCTCAAGCTTCTTCAGGGAAGAAAGATGGGAATAAAGATCACCAGGGCTAGGATCTACAGAGACCGACTTCTGAAGCTCCTGAATC
TGAAGTTTTTCTACGACATCGATAGGGATGGCTTTCGAAGCAGTGAATGAACAAATAGCCAAAGGAACAGGAACAGAGTTTGCAACAACAAGCTGTCTGTXXXXXXXXXXAAACTTAAGTGCTTCCTCAAGCTTCTTCAGGGAAGAAAGATAGGAATAAAGATCACCAGGGCTAGGATCTACAGAGACCGACTTCTGAAGCTCCTGAATC
>Marker106170
ATGCCTTGTGTTCATCTAATGTGTTATTTTGGACAGTAACGTTAGATTGTATTCTTTGGATGGTAATAAACCTGTAATTTTTAGCTTTTTAGCTTAATCGXXXXXXXXXXTCATGAACGTTAACATGATACAATCTAGATTATAGTTTCTGAACATAACTAGTGGGTTCTTTATCACCCAATAGGTATGCCGAGGTTGATGACGTTATCG
ATGCCTTGTGTTCATCTAATTTGTTACTTTGGACAGTAACGTTAGATTGTATTCTTTGGATGGTAATAAACCTGTAATTTTTAGCTTTTTAGCTTAATCGXXXXXXXXXXTCATGAACGTTAACATGATACAATCTAGATTATAGTTTCTGAACATAACTAGTGGGTTCTTTATCACCCAATAGGTATGCCGAGGTTGATGACGTTATCG
>Marker106643
TGGAGGTGATGGTGGGGAGAGAGCTGGTTGGAGTTTTGATATTGTTTATGTCTGTTTTTGATGCGTTTCAGAACTAGAGTTGTATCTCCTTTTGTTGTGTXXXXXXXXXXATCAAAGCCTGGTTGTCTTCTACCGCTATCGCTGTGCTACCTGCTCCTCAGAGATGTCGCAAACCTTAGGAGGGGAGAAGGTGAGTCAATATCTGTAACA
TGGAGGTGATGGTGGGGAGAGAGCTGGTTGGAGTTTTGATATTGTTTATGTCTGTTTTCGATGCGTTTCAGAACTAGAGTTGTATCTCCTTTTGTTGTGTXXXXXXXXXXATCAAAGCCTGGTTGTCTTCTACCGCTATCGCTGTGCTACCTGCTCCTCAGAGATGTCGCAAACCTTAGGAGGGGAGAAGGTGAGTCAATATCTGTAACA
>Marker106797
CAAAATGGTGCTAGATTGATCCCTTTTATCCATTTAACCCAACATCTTGGACATTGGAGTATCTTACACTTTTTTCCACAGATAGTTTCTAACGGGGAAGXXXXXXXXXXTCACAGTCTGAGAGTTACTATAGAGCTTTCACGCGCCATTAAGTGGGCAGCTCCATTACCATACCGTTGAGCAACCTGCAATGGAGCCAAAGACAAGGGA
CAAAATGGTGCTAGATTGATCCCTTTTATCCATTTAACCCAACATCTTGGACATTGGAGTATCTTACACTTTTTTCCACAGATAGTTTCTAACGGGGAAGXXXXXXXXXXTCACAGTCTGAGAGTTACTATAGAGCTTTCACGCGCTATTAAGTGGGCAGCTCCATTACCATACCGTTGAGCAACCTGCAATGGAGCCAAAGACAAGGGA
>Marker107368
ATGTTGGTGACGGTGATGATTGTCGCAGTCTCCTTTGGCTTGAGGATCGACAGCAGGGAGGGTCTTTGGCAATGGTGTCGTTCTACATTGCATCAATATCXXXXXXXXXXTAAGAATATTTGTATTTTGTTTATTATGTGGACTAAATTTTCGAAGTTGCGTATATAGAGCACCGTCGAGTAATACAGTAAGTGATTTTTGCTTTTTTCG
ATGTTGGTGACGGTGATGATTGTCGCAGTCTCCTTTGGCTTGAGGATCGACAGCAGGGAGGGTCTTTGGCAATGGTGTCGTTCTACATTGCATCAATAGCXXXXXXXXXXTAAGAATATTTGTATTTTGTTTATTATGTGGACTAAATTTTCGAAGTTGCGTATATAGAGCACCGTCGAGTAATACAGTAAGTGATTTTTGCTTTTTTCG
>Marker115187
ATGCTTACCAACAGCTCTAGCTAGGCAACGAAATTCACAAATTTGGGCTAAAAATGGGTTTAATACATTGAATTGTAATCAGATGAATCACAAGATGACAXXXXXXXXXXCTGAATGGACATGATAAATTTTGTTTGATTTCCATTGTTGTCCCATGTCGGAAATCGGCATTTCTCTTCTGGGTTCTGGTTTTTGTTCTGAGTCTCATCC
ATGCTTACCAACAGCTCTAGCTAGGCAACGAAATTCACAAATTTGGGCTAAAAATGGGTTTAATACATTGAATTGTAATCAGATGAATCACAATATGACAXXXXXXXXXXCTGAATGGACATGATAAATTTTGTTTGATTTCCATTGTTGTCCCATGTCGGAAATCGGCATTTCTCTTCTGGGTTCTGGTTTTTGTTCTCAGTCTCATCC
>Marker115279
AGTGTAATACTGTAATTATTTTTAAAAAAAGCCTTCAGTCTGATCAATCACCACTCAGCAAACTCCAAAAAGTAGTAGAACAAAACATACCACCCGTTTCXXXXXXXXXXTTATGTCCTTTATACTAAACAGAACTTATATATTGATCTGATAACGTCAATATCCTATTCTCCATCCCTGTAATCTCTATTTTGTTACATCCAAAAGTTA
AGTGTAATACTGTAATTATTTTAAAAAAAAGCCTTCAGTCTGATCAATCACCACTCAGCAAACTCCAAAAAGTAGTAGAACAAAACATACCACCCGTTTCXXXXXXXXXXTTATGTCCTTTATACTAAACAGAACTTATATATTGATCTGATAACGTCAATATCCTATTCTCCATCCCTGTAATCTCTATTTTGTTACATCCAAAAGTTA
>Marker118346
TCAACATGAACATAGAAGTTGTAGCCAATCAAACTAGATTTTTGAACGCCGCAGGTCTTGCATCAATCGGACTTTCGAGCGATGAGTTATGTCAAAAATAXXXXXXXXXXAATAACTAAGACAACTTATGGACGATTGAGTTGTTGATTGAGGAGCTCTCCATGGTTACAAGATGCGATTGTGTGATTGATGATACACATGAAATCTCGT
TCGACATGAACATAGAAGTTGTAGCCAATCAAACTAGATTTTTGAACGCCGCAGGTCTTGCATCAATCGGACTTTCGAGCGATGAGTTATGTCAAAAATAXXXXXXXXXXAATAACTAAGACAACTTATGGACGATTGAGTTGTTGATTGAGGAGCTCTCCATGGTTACAAGATGCGATTGTGTGATTGATGATACACATGAAATCTCGT
>Marker120568
TTCTAGCTGCCCTTGTTCCTCTAACCACTCCAGTTCCTCTAACTCTTGTAGGATGTCCTCTAATCACACCAGCACCTCTAACTCTTCCTCTCGCTGCTCTXXXXXXXXXXTCTCACCACCTCATCTCTAATACGTCGATTTCTGTTTGCCTCAACAGCAACAACCCAATCATTTTATCATACAATAAGAAAGGTAGATCATACGTGAATG
TTCTAGCTGCCCTTGTTCCTCTAACCACTCCAGTTCCTCTAACTCTTGTAGGATGTCCTCTAATCACACCAGCACCTCTAACTCTTCCTCTCGCTGCTCTXXXXXXXXXXTCTCACCACCTCATCTCTAATACGTCGATTTCTGTTTGCCTAAACAGCAACAACCCAATCATTTTATCATACAATAAGAAAGGTAGATCATACGTGAATG
>Marker124687
ATGCCCTAATTTCACTCTGAAATCCAAAAACTACACCTGCAGATGAGGCATAACTTGCATCAATTGATGAGTAGAGAACGAAGGTAATTTTTTCAGTCATXXXXXXXXXXCAGATTAATCAGTTGGTATCCGCTTTCATACCTGGCAGCTTGCATTTATACTGAAAGAAACTTGTTTCCAGTGTAGAGCTCCTGCCCATCAATAATTATA
ATGCCCCAATTTCACTCTGAAATCCAAAAACTACACCTGCAGACGATGCATAACTTGCATCAATTGATGAGTGGAGAACGAAGGTAATTTTTTCAGTCATXXXXXXXXXXCAGATTAATCAGTTGGTATCCGCTTTCATACCTGGCAGCTTGCATTTATACTGAAAGAAACTCGTTTCCAGTGTAGAGCTCCTGCCCATCAATAATTATA
>Marker125471
TTATTTTTTGGGCAGATGGAGGAATTCTTCCGATTGTTTCTAGTAAGCAGGTAATTTTTTTAACTTCTGTTATTGTTGACTTTGTTTCCTTTATCCCGTAXXXXXXXXXXATTAAAATATAGCTCTAGTCTTCGGTGTTGAGTCCTAAGATGCTGGTTGAATTGAACTTTTTAGGTCATTGATGTTATCACAGCTACTACGGCTGATTTG
TTATTTTTTGGGCAGATGGAGGAATTCTTCCGATTGTTTCTAGTAAGCAGGTAATTTTTTGAACTTCTGTTATTGTTGACTTTGTTTCCTTTATCCCATAXXXXXXXXXXATTAAAATATAGCTCTAGTCTTCGGTGTTGAGTCCTAAGATACTGGTTGAATTGAACTTTTTAGGTCATTGATGTTATCACAGCTACTACGGCTGATTTG
>Marker125601
CATGATCTCATGAACTGTTGCATTTTAATAATTTGATTTATCTCGAAAAGTCCAATTTTTTATTATTATTATTCAATAACATGTTCCCTCTAAGGGAAGCXXXXXXXXXXAGGGAACTGGGGTTAGCCTTTTTGAGCCAAAACAGAAGCTTTACCCGCTAGTGAGTGGATTTGATGCAGCCATTGACGATGACAGCAAGGAGACTGCAAG
CATGATCTCATGAACTGTTGCATTTCAATAACTTGATTTATCTCGAAAAGTCCAAGATTTTTTTTATTATTATTCAATAACATGTTCCCTCAAAGGGAAGXXXXXXXXXXAGGGAACTGGGGTTAGCCTTTTTGAGCCCAAACAGAAGCTTTACCCGCTAGTGAGTGGATTTGATGCAGCCATTGACGATGACAGCAAGGAGACTGCAAG
>Marker125684
ACTTCGCCAATTTCTCAGGATGCAACAAGTAAATAAATACTCTTTTTCATTTTATTCCCATTCATAAACATATTAGTCCGTTTACGTTAAAATACAGACTXXXXXXXXXXCATCATCGACACTAGCGGGGAACGTGGTCCCAAACGCAAGCCTATTCGGGCTAGCCAAAGGCTCAGCTCGTGGTGCAGTGCCGGATGCCAGGATTGCGGT
ACTTCGCCAATTTCTCAGGATGCAACAAGTAAATAAACACTCTTTTTCATTTTATTCCCATTCATAAACATATTAGTCCGTTTACGTTAAAATACAGACTXXXXXXXXXXCATCATCGACACTAGCGGGGAACGTGGTCCCAAACGCTAGCCTATTCGGGCTAGCCAAAGGCTCAGCTCGTGGTGCAGTGCCGGATGCCAGGATTGCGGT
>Marker125745
TTAATGTTCTTTGTTGGTCATCGGCTCCGCTCTGTTGCTCCTGTTGGTTGGTGTTCTCGCCTGGTCTCTTTGCTTTTTTCTGTCATTTTTGGTTGGCTTAXXXXXXXXXXATAAGTTGATCTTTTGTGCACTTAGTCAGCCGTATCCTAGTTGAATGCAGATTCTGTCAGGAATTGGCAAGTTTTGATTGGGTGTATGATATGCCAGCTT
TTAATGTTCTTTGTTGGTCATCGGCTCCGCTCTGTTGCTCCTGTTGGTTGGTGTTCTCGCCTGATCTCTTTGCTTTTTTCTGTCATTTTTGGTTGGCTTAXXXXXXXXXXATAAGTTGATCTTTTGTGCACTTAGTCAGCCGTATCCTAGTTGAATGCAGATTCTGTCAGGAATTGGCAAGTTTTGATTGGGTGTATGATATGCCAGCTT
>Marker129289
ATTTAAGGAAATGCTTTATTGAGATTCCACGGAATCAAGAAGGGGGAAGATATACTTCTCCATGAATTCGATATCCGCGGAAGGAATGAAGGCAGTAGAAXXXXXXXXXXCATTGTCCATTATCGACTACGGATTGGAAGAGACGACTCATCTTACATGGACCTTAGCTTCCGAGCTCGATGAACCATCACTACATTAGAAAACTGTTAT
ATTTAAGGAAATGCTTTATTGAGATTCCACGGAATCAAAAAGGGGGAAGATATACTTCTCCATGAATTCGATATCCGCGGAAGGAATGAAGGCAGTAGAAXXXXXXXXXXCATTGTCCATTATCGACTACGGATTGGAAGAGACGACTCATCTTACATGGACCTTAGCTTCCGAGCTCGATGAACCATCACTACATTAGAAAACTGTTAT
>Marker133672
TTGGCGGGGGATAACTCTGTTGACGGCTGTGAGTAGAATGGATGCAAGGGATGGGCGCCTGGTTCTGAAAGTAAGCTTTCTCCCAGGCTGGATAGTCTCTXXXXXXXXXXAAGGTTCTTGGGGAAGTGGCATAGACAGAGCTGTCCGACCCCAGGTGAGAAGAGCATGAGGGCATTCGAAAGAATCAACCTGGAACTCCCCTAGGAAATT
TTGTCGGGGGACAACTCTGTTGACGGCTGTGAGTAGAATGGATGCAAGGGATGGGCGCCTGGTTCTGAAAGTAAGCTTTCTCCCAAGCTGGATAGTCTCTXXXXXXXXXXAAGGTTCTTGGGGAAGTGGCATAGACAGAGCTGTCCGACCCCAGGTGAGAAGAGCATGAGGGCATTCGAAAGAATCAACCTGGAACTCCCCTAGGAAATT
>Marker138672
TTTTTTTGTAGTTTCCTTATAGTGATAGTTTGTCTCCCATATTTGAGAAACTAGACTGCGAAACCTAGGTTGATTAAAGTCTATTGAAGGGACCTCGAGTXXXXXXXXXXGGATTTGTTCTTTCCAGCTCTCCCTTGTAATCCCACAGTTTGCCGAACTATTTGCTTCCTCTCCATGGATAATCTTTAGGGCTTCCTACTTGGTTCGATA
TTTTTTTGTAGTTTCCTTATAGTGATAGTTTGTCTCCCATATTTGAGAAACTAGACTGCGAAACCTAGGTTGATTAAAGTCTATTGAAGGGACCTCGAGTXXXXXXXXXXGGATTTGTTCTTTCCAGCTCTCCCTTGTAATCCCACAGTTTGCCGAACTATTTGCTTCCTCTCCATGGATAATCTTTAGAGCTTCCTACTTGGTTCGATA
>Marker139296
CTCTCCGGCAGATTAGGATCTTCAGATAAGATCTCGATGAAGCTCCGGTGACGAGACTGAGAGGTAAAAGCTCTTAACGGATTATCCCCCAAAAGCGAGCXXXXXXXXXXTTCTTGCTAGGGATCAGACTCGATTGGAAGGCTCCACTGCTCGGAATCCGGACGGCGGCGGAAGGATCAGCGTGGACGTAGACGTTGTAGTAGCGGGAGT
CTCTCCGGCAGATTAGGATCTTCAGATAAGATCTCGATGAAGCTCCGGTGACGAGACAGAGAGGTAAAAGCTCTTAACGGATTATCCCCCAAAAGCGAGCXXXXXXXXXXTTCTTGCTAGGGATCAGACTCGATTGGAAGGCTCCACTGCTCGGAATCCGGACGGCGGCGGAAGGATCAGCGTGGACGTAGACGTTGTAGTAGCGGGAGT
>Marker141107
GGGTGCTTAATCTTCTAAGAGGTGTGATAGAAATTCTACCAGTCTTTACCTTCTGATTCGGAACTGTAGCTTCTGCTAGTAATTGTGTGTTTTCAAGCAGXXXXXXXXXXTGGATATATGACACACCTGTCCATTCTAATGTGGAAGCCAAGTTGAGGCGGCTCTTAGTTGAGCTTGGAAACCAAGAGAAGATACTCGGAGTCCAGGTCT
GGGTGCTTAATCTTCTAAGAGGTGTGATAGAAATTCTACCAGTCTTTACCTTCTGATTCGGAACTGTAGCTTCTGCTAGTAATTGTGTGTTTTCAAGCAGXXXXXXXXXXTGGATATATGACACACCTGTTCATTCTAATGTGGAAGCCAAGTTGAGGCGGCTCTTAGTTGAGCTTGGAAACCAAGAGAAGATACTCGGAGTCCAGGTCT
>Marker141199
ACACGTGTGGGTGTATACTTGCAGGTAATACCTAACGCCTAAAATCTTCTGCTAAACTAAAAAATTCGCATCAGGATACAAAACTACCATAACCATACACXXXXXXXXXXGTTAAACATCATAAAACATCGTTTTAGTGTGGGGACAGGGTGGAAAATGGTCATGCTCATTCCGCACACAACACTGTTTTTCCGCTAATTGAGTGGGTGT
ACACGTGTGGGTGTATACTTGCAGGTAATACCTAACGCCTAAAATCTTCTGCTAAAACTAAAAAATTCGCATCTGGATACAAAACTACCATAACCATACAXXXXXXXXXXGTTAAACATCATAAAACATCGTTTTAGTGTGGGGACAGGGTGGAAAATGGTCATGCTCATTCCGCACACAACACTGTTTTTCCGCTAATTGAGTGGGTGT
>Marker146613
GTCGATATTCCTTTCTATGCAAAAATGACAAGGCATCATTTTTCAAATTTAAACTGAAATCAAACTTCAAAAGGCTTCACATTAATCGTCCATCAGTCAAXXXXXXXXXXAAGAAATAACTAAAACTCAAATCCTAATTTGAGTCTATCTATCTCACATATAGACCGAATAAAAAAAGTGGGAGGTAATTCACCCACGGTCGCCAAAGAC
GTCGATATTCCTTTCTATGCAAAAATGACAAGGCATCATTTTTCAAATTTAAACTGAAATCAAACTTCAAAAGGCTTCACATTAATCGTCCATCAGTCAAXXXXXXXXXXAAGCAATAACTAAAACTCAAATCCTAATTTGAGTCTATCTATCTCACATATAGACCGAATAAAAAAAGTGGGAGGTAATTCACCCACGGTCGCCAAAGAC
>Marker147927
GGATCGCGCGCTGAGTCACCCTTGGTCCGACCCGAGGCGCAAAAAGACTAAAATGCCCTCGACCGACCAACGCTAAAGAAGGAAGACGGGGCAAAATGGCXXXXXXXXXXTCTCCTTCGTATCCTTCATTGTTTTCGACGGCTGTCACTCCTCCTCCTTCCCCTTTTCTTTTCTGCTTTGTTTTCCCCTTTGTCTCTCTTCTTCTTCACC
GGATCGCGCGCTGAGTCACCCTTGGTCCGACCCGAGGCGCAAAAAGACTAAAATGCCCTCGACCGACCAACGCTAAAGAAGGAAGACGGGGCAAAATGGCXXXXXXXXXXTCTCCTTCGTATCCTTCATTGTTTTCGACGGCTGTCACTCCTCCTCCTTCCCCTTTTCTTTTCTGCTTTGTTTTTCCCTTTGTCTCTCTTCTTCTTCACC
>Marker148581
ATTGATTATATTCCTACTAACTCATTATGTTAATCAATTCAATTGATCTCGATAGTGTTTTTGATCATAATGGTCTAATATTAATCTAATTGGTAACATTXXXXXXXXXXATTCCTACCAGTCATTACGATAATTAGCCAATCGATTTTTTCGTTTTTTCGTTAGTTTTAACATAACTCATATTCTTTTTGTCATTGCCACATAATTATG
ATTGATTATATTCCTACTAACTCATTATGTTAATCAATTCAATTGATCTCGATAGTGTTTTTGATCATAATGGTCTAATATTAATCTAATTGGTAACATTXXXXXXXXXXATTCCTACCAGTCATTACGATAATTAGCCAATCGATTTTTTCGTTTTTTCATTAGTTTTAACAGAACTCATATTCTTTTTGTCATTGCCACATAATTATG
>Marker148678
CCGCACGCTCCGCCGACGGCGTCCCGCGGGTCCGACGCTGCGTAGAAGGTTGCTCGAGCTGAAAGCCAGTCGTTTGAGGAGGAGGAAGAAGGGATACTGTXXXXXXXXXXCTTTAATCTTGACTTTAGTTATTATCTCTCGGTTACTGTGTTTCCCGCCTTTTCTTGTTCTTTTTCTGTTTTATTTTTTCCATTAGGAAGTCGCATATTG
CCGCACGCTCCGCCGACGGCGTCCCGCGGGTCCGACGCTGCGTAGAAGGTTGCTCGAGCTGAAAGCCAGTCGTTTGAGGAGGAGGAAGAAGGGATACTGTXXXXXXXXXXCTTTAATCTTGACTTTAGTTATTATCTGTCGGTTACTGTGTTTCCCGCCTTTTCTTGTTCTTTTTCTGTTTTATTTTTTCCATTAGGAAGTCGCATATTG
>Marker148700
AACGAAAACCCTGAAACTGGGATGTCTGGAGCTTTGGATAACATCATTCAGGAAGCTAAGCTAGTGAAAACCGCGCTTGGGAGCTCGTTACCTATCAGTTXXXXXXXXXXTGAAAGAGAAATCAGCACCAGCAAATGTTGTTGAGAAATGATAAAGATTTTTCGCTGGAATTTGTTATATAATGGTTGGTGAATGTTTTCAAGCTTTCAT
AACGAAAACCCTGAAACTGGGATGTCTGGAGCTTTGGATAACATCATTCAGGAAGCTAAGCTAGTGAAAACCGCGCTTGGGAGCTCGTTACCTATCAGTTXXXXXXXXXXTGAAAGAGAAATCAGCACCAGCAAATGTTGTTGAGAAATGATAAAGATTTTTAGCAGGAATTTGTTATATAATGGTTGGTGAATGTTTTCAAGCTTTCAT
>Marker148838
ACCAAAGGCTCCTCCGAATTCGGCTTTGTCGTCATATTCGCACCCCTATCCTACGTGCAACCTACATCGACAAAGAACTTATTAAATGTCATGAATTCGGXXXXXXXXXXCGGCTTCTCTGCTGATACCTGAACAGAACCGGAAACAGTAAAAAATGATTCAGAACACAGATTGATTAAACCTGAGGAAATGAACACTTTGATAATGAGG
ACCAAAGGCTCCTCCGAATTCGGCTTTGTCGTCATATTCGCACCCCTATCCTACGTGCAACCTACATCGACAAAGAACTTATTAAATGTCATGAATTCGGXXXXXXXXXXCGGCTTCTCTGCTGATACCTGAACAGAACCGGAAACAGTAAAAAATGATTCAGAACACAGATTGATTAAACCTGAGGAAATGAACACTTCGATAATGAAG
>Marker149086
AACCACGACCTGCGTTCGTCCTGATGGGACATGAACAAAATGCTTGTATTAGATAGTTAAAACAAAACTACCATCATAATTGACAAAAAACCCAGAAAAAXXXXXXXXXXTCCAGAGAGAAAATACCCAGATCAAACAAAACCATAAGAAAACTCGAAGAACATGAAGAACAAGAGCAAAAAATGGAGATAACCTACATTTTTTGGGTTT
AGCCACGACCTGCGTTCGTCCTGATGGGACGTGAACAAAATGCTTGTATTAGATAGTTAAAACAAAACTACCATCATAATTGACAAAAAACCCAGAAAAAXXXXXXXXXXTCCAGAGAGAAAATACCCAGATCAAACAAAATCATAAGAAAACTCGAAGAACATGAAGAACAAGAGCAAAAAATGGAGATAACCTACATGTTTTGGGTTT
>Marker149102
GTTTGAAGAGACTATAACTACAAGGAAAACAATTTCTAGAAGCAGATTTTTAACAGGGATTCTAAAACCTTGTTAAATTGTTGCCTATTAATAGTGGAATXXXXXXXXXXATCTTCAAGAAGAAGATGAAAGTTGATGGTTCCATCGATAAGTTTAAAGCTCAGTTAGTGATTCGGGATTTTAAATAGAGCAATTGGATTGATTACTTCA
GTTTGAAGAGACTATAACTACAAGGAAAACAATTTCTAGAAGCAGATTTTTAACAGGGATTCTAAAACCTTGTTAAATTGTTGCCTATTAATAGTGGAATXXXXXXXXXXATCTTCAAGAAGAAGATGAAAGTTGATGGTTTCATCGATAAGTTTAAAGCTCAATTAGTGATTCGGGATTTTAAATAGAGCAATTGGATTGATTACTTTA
>Marker153868
TAGTTTTTTTTTTATTCCAGTTATTATTCTTTTCAATTTCTTTTTCCATTTGTTGGGTTCTCCTCTAATTGAAGGGAGGATCATCATCATCATCAATAATXXXXXXXXXXCAACATCATCATAAAAAGGTCACGGTCCCAAGCTCCAGTTGAATATATCTATGATGAATATATGACTGCAGAAAGGGAGCAATCTGAACCGAGAACAAGG
TAGTTTTTTTTTTATTCCAGTTATTATTCTTTTCAATTTCTTTTTCCATTTGTTGGGTTCTCCTCTAATTGAAGGGAGGATCATCATCATCATCAACTTCXXXXXXXXXXCAACATCATCATAAAAAGGTCACGGTCCCAAGCTCCAGTTGAATATATCTATGATGAATATATGACTGCAGAAAGGGAGCAATCTGAACCGAGAACAAGG
>Marker154098
TTCTTCAGCAAACCATTCCTTCTCTTGGAGAAGGTCACTTGCCTGCTTGTAGCGTTCTCTATCCTCCTCATCTGTGTCTTCCCCCTAACCATTATTCCTTXXXXXXXXXXGCAGGAGCTGCAAAAATTCAAATCAAAGATCAGTTCTTCCAAAAACCAAGACCAGCATGGTATATATATAATCAGTTATATAAAGTAACCCACATCACAT
TTCTTCAGCAAACCATTCCTTCTCTTGGAGAAGGTCACTTGCCTGCTTGTAGCGTTCTCTATCCTCCTCATCTGTGTCTTCCCCCTAACCATTATTCCTTXXXXXXXXXXGCAGGAGCTGCAAAAATTCAAATCAAAGATCAGTTCTTCCAAAAACCAAGACCAGCATGGGATATATATAATCAGTTATATAAAGTAACCCACATCACAT
>Marker154253
CTCCGCCCCATTATCGAAGGCTTGATATGGTTCTTGTAAATGAACATTGACAAGATTGCCTGCCCCGTAGCCAAGTGAAGGTTCTCTTACCTTGAGTATCXXXXXXXXXXTGAGGGCTGTGAAATGCAAACTTAAGAAGTTCAACCGAGATAATTTTTCTGATATTAGTGCTCGATTGAGGGTTGCCCAACTCACCGTTGATTAGGCTTA
CTCCGCCCCATTATCGAAGGCTTGATATGGTTCTTGTAAATGAACATTGACAAGATTGCCTGCCCCGTAGCCAAGTGAAGGTTCTCTTACCTGGAGTATCXXXXXXXXXXTGAGGGCTGTGAAATGCAAACTTAAGAAGTTCAACCGAGATAATTTTTCTGATATTAGTGCTCGATTGAGGGTTGCCCAACTCACCGTTGATTAGGCTTA
>Marker155972
GAGCCTGTCGGAGAATATGATAGTCAACATAGCTGTCACCACTAAATTAGATGGCAACAGTTAGTGTCATGATTTTAGGGGGTTAATGCTGAAAAAATTAXXXXXXXXXXTTTACGGATCACTCAATAAAAACCTCTTTGCCATCTGGGTTTCTCATGACAACACCATCAACAACTGGAGACTTCCTTGCCTCGGCATGTGCATATTCAG
GAGCCTGTCGGAGAATATGATAGTCAACATAGCTGTCACCACTAAATTAGATGGCAACAGTTAGTGTCATGATTTTAGGGGGTTAATGCTGAAAATATTAXXXXXXXXXXTTTACGGATCACTCAATAAAAACCTCTTTGCCATCTGGGTTTCTCATGACAACACCATCAACAACTGGAGACTTCCTTGCCTCGGCATGTGCATATTCAG
>Marker156061
CACGTATTAAAACAGTCCATTTACACATAAGAATCCCCTGACTGCAGTATCAACGGAATTGGATAAACACAAGGAGGGCATGTGAGCAATTCATATCTTTXXXXXXXXXXCACCCATTAACATCACAAACATATGAGCGTCCTTCACAACGCAGAAGATCAAATCCACACACCTGCAGCAAAACCATTTGACTAGTTAAGATTTTTGAAA
CACGTATTAAAACAGTCCATTTACACATACAAGAATACCCTGACTGCAGTATCAACGGAATTGGATAAAACAAGGAGGGCATGTGAGCAGTTCATATCTTXXXXXXXXXXCACCCATTAACATCACAAACATATGAGCGTCCTTCACAACGCAGAAGATCAAATCCACACACCTGCAGCAAAACCATTTGACTAGTTAAGATTTTTGAAA
>Marker156112
TGAATCAGGACAACAAAATCATGAATTAGACGCAAGTAGAGAAGTCAGCTGCTTAAATTCCTACGAACAAGCCCATAGAAGGTAGATGCTTTCAGCAAGTXXXXXXXXXXTGGGATGAAATTTCAAGCAACATCCTAGCTCATTGCTCACTACAAATCAAATACACAATTTTTCATCAAATGTTGATTCTTGGTCGAATGGATCAAGAGC
TGAATCAGGACAACAAAATCATGAATTAGACGCGAGAAGTCAGCTGCTTAAATTCCTACGAACAAGCCCATAGAAGGTAGATGCTTTCAGCAAGTTCGATXXXXXXXXXXTGGGATGAAATTTCAAGCAACATCCTAGCTCATTGCTCACTACAAATCAAATACACAATTTTTCATCAAATGTTGATTCTTGGTCGAATGGATCAAGAGC
>Marker156402
ACTTGGTGTGCATTCACAATATCACTCAATTGAGTGACACAATTGAGGGATGGGATGTTTGGGGTGTCAAATAGTGACTTAGCACCATTGTCAAGTGTTTXXXXXXXXXXGAGTCTAGTAACCCTCCTCTCCCTGTGTTCCACCTCTTCACTCTCTTGTTTGCTTAGTTCGTTAACTTAAATTAGTTCGAATTACTCTTGTAGATGATAA
ACTTGGTGTGCATTCACGATACCACTCAATTGAGTGACAGAATTGAGGGATGAGATGTTTGGGGCGTCAAATGGTGACTTAGCACCATTGTCAAGTGTTTXXXXXXXXXXGAGTCTAGCAACCCTCCTCTCCTTGTGTTCCACCTCTTCACTCTCTTGTTTGCTTAGTTCGTTAACTTAAATTAGTTCGAATAACTCTTGTAGATGATAA
>Marker156455
ACTTCGGCTTTATCTCGTCCGCGATCCTGCACATCGGAGACACCAATACTGTTTTCCCCAACTCGAAATCAGTCGAAATCGAAATTAGGTCAGATCAGAAXXXXXXXXXXAACAAAGGATCTCGTTTCACGGCACCGAAATACGACGAGCAGTCATCAACGACGAGGTCAATGTTAGAAACGTAAGCCTTCAAACCTTGCGATCTTCCGT
ACTTCGGCTTTATCTCGTCCGCGATCCTGCACATCGGAGACACCAATACTGTTTTCCCCAATTCGAAATCAGTCGAAATCGAAATTAGGTCAGATCAGAAXXXXXXXXXXAACAAAGGATCTCGTTTCACGGCACCGAAATACGACGAGCAGTCATCAACGACGAGGTCAATGTTAGAAACGTAAGCCTTCAAACCTTGCGATCTTCCGT
>Marker156943
TCGAAACAAACCAGGAGGTTCAACTCTGAAGTTCCCAACCTGCGATTTCATAATCATCAGAATCTTAAAATCCAGGAAGGGAACGGAAAACTGCAAAGTAXXXXXXXXXXGGTGACTTACACAAAGTGAACTATTAACAATTTTAAAGAGAAGCAGGCATCTGATGGTAACAATTCTACACGATAATAGCCGCTATGATGTCCTTTTATT
TCGAAACAAACCAGGAGGTTCAACTCTGAAGTTCCCAACCTGAGATTTCATAATCATCAGAATCTTAAAATCCAGGAAGGGAACGGAAAACTGCAAAGTAXXXXXXXXXXGGTGACTTACACAAAGTGAACTATTAACAATTTTAAAGAGAAGCAGGCATCTGATGGTAACAATTCTACACGATAATAGCCGCTATGATGTCCTTTTATT
>Marker157053
CACGTGTATTAGACGATGTGAAGTAAGTCACCCACTACGCCCTGCTGTGAATTCCATGTAGATTATTTATTTTTTCGATTAATACACGTAAAACGTAGACXXXXXXXXXXCATCTCCTTCGACGGGATCTACCAACAACGGATCTAGTGGTAGGAAATCAGTGACCACCACGATGGGAGTGAGTTCAATTACGTGTTCCCAAAATGTGGA
CACGTGTATTAGACGGTGTGAAGTAAGTCACCCACTACGCCCTGCTGTGAATTCCATGTAGATTATTTATTTTTTCGATTAATACACGTAAAACGTAGACXXXXXXXXXXCATCTCCTTCGACGGGATCTACCAACAACGGATCTAGTGGTAGGAAATCAGTGACCACCACGATGGGAGTGAGTTCAATTACGTGTTCCCAAAATGTGGA
>Marker157129
ATAATTACCAACCCATCAGTATTTATTAATTAAATAACTTGTTATAACTCATTGATTAATTATTTGCCTAATGATGATCATCATTGGGGGGACCGAGCAAXXXXXXXXXXTTCTGCATACAAACATCAATTCCAGACTGACTTGGGAGCTTTCCTCATAGCTAGATCTCTCGAGTTGACCACTGGCGGGACCATGTTCGTCGTCTGCTTG
ATAATTACCAACCCATCAGTATTTATTAATTAAATAACTTGTTATAACTCATTGATTAATTATTTGCCTAATGATGATCATCATTGGGGGGACCGAGCAAXXXXXXXXXXTTCTGCATACAAACAACAATTCCAGACTGACTTGGGAGCTTTCCTCATAGCTAGATCTCTCGAGTTGACCACTGGAGGGACCATGTTCGTCGTCTGCTTG
>Marker159455
TTGCTTCCAACGTTTTTGACCGAAAGCTCAAAGGGCTGAGGTGGTGGTAGTAGTAAGTGTTCCCTTTCCTTTTGGCACTTTTGGCATACGCACACGTTTTXXXXXXXXXXTGAAAGAGCATGTTTAGTTACTATAAGAGCAACTCTATTAGCATCGGACCTGACAACCTGCACTTAACGAACTTATAGGATGAGGACATGCCACCAAAAA
TTGCTTCCAACGTTTTTGACCGAAAGCTCAAAGGGGTGAGGTGGTGGTAGTAGTAAGTGTTCCCTTTCCTTTTGGCACTTTTGGCATACGCACACGTTTTXXXXXXXXXXTGAAAGAGCATGTTTAGTTACTATAAGAGCAACTCTATTAGCATCGGACCTGACAACCTGCACTTAACGAACTTATAGGATGAGGACATGCCACCAAAAA
>Marker160035
GTAAGTTAAGCAGGCTACAAGTCATTAACTTTTGTCCAATTTAGAACACTAATCGATTTGAGTCCGTTCGAATTCGGTCACATTCATTTATCTTAAGTATXXXXXXXXXXTTTAGATCACTAATTGGGTTGAGTTGGTTTGAATCAGATATCTCCATATTATCTAAGCATATCTCACATAATATGATCACTTTTAAATATTCTTTTAACG
GTAAGTTAAGCAGGCTACAAGTCATTAACTTTTGCCCAATTTAGAACACTAATCGATTTGAGTCCGTTCGAATTGGGTCACATTCATTAATCTTAAGTATXXXXXXXXXXTTTAGATCACTAATTAGGTTGAGTTGGTTTGAATCAGATATCTCCATATTATCTAAGCATATCTCACATAATATGATCACTTTTAAATATTCTTTTAACG
>Marker160048
ATTTCAAGTTTATAGCAGATGAGAAGAACGAATCAAACGATGCTAGAGATCCAATGTGACGTGGTTCCCTAGCAGTCACGGACCAAAGGAAGTCGATCTTXXXXXXXXXXATCCTTGTTTAACTGATATTTCAAGCGTAATTGTATTGCTTTAGGTAGAAGTTTAGGATGTTTTATGCAATTTAAGCTTTTATCTCGATTTGGTGTCCCG
ATTTCAAGTTTATAGCAGATGAGAAGAACGAATCAAACGATGCTAGAGATCCAATGTGACGTGGTTCCCTAGCAGTCACGGATCAAAGGAAGTCGATCTTXXXXXXXXXXATCCTTGTTTAACTGATATTTCAAGCGTAATTGTATTGCTTTAGGTAGAAGTTTGGGATGTTTTATGCAATTTAAGCTTTTATCTCGATTTAGTGTCCCG
>Marker160066
AAAGGAGCATCATTAGACTCATCATCAAACACTGGCAAAACTAGTGGATCAGAAGAAGCAACGACAAGTATAGAATAAAAAGGGACCTGCTCAAGGAAGGXXXXXXXXXXAGCACAACGAGCAGTTCAAGCTTGGAATTTGGTGCGCTCGTGAGGAGGAAGAAAGACAGAACACAAACACCCAAACACATGGAGCATAGAATACTGAGGT
AAAGGAGCATCATTAGACTCATCATCAAACACTGGCAAAACTAGTGGATCAGAAGAAGCAACGACAAGTATAGAATAAAAAAGGACCTGCTCAAGGAAGGXXXXXXXXXXAGCACAACGAGCAGTTCAAGCTTGGAATTTGGTGCGCTCGTGAGGAGGAAGAAAGATAGAACACAAACACCCAAACACATGGAGCATAGAATACTGAGGT
>Marker160091
CTTTTTGTCAAAACTGGGAGGACACTCCATATATACTAGCTCTTTTAATTCACTATGAAGAAAAGCATTCTTCACATCGAGTTGATGAATAGGTGATGTTXXXXXXXXXXAATGACTCATCTTAATCAATACAATATTCTTGCTTGAAACCTTGTGCCACACACCGAGCTTCATGACAAGCAACCAAACTATTGAATGACGTATAATTAT
CTTTTTGTCAAAACTGGGAGGACACTCCATATATACTAGCTCTTTTAATTCACTATGAAGAAAAGCATTCTTCACATCGAGTTGATGAATAGGTGATGTTXXXXXXXXXXAATTACTCATCTTAATCAATACAATATTCTTGCTTGAAACCTTGTGCCACACACCGAGCTTCATGACAAGCAACCAAACTGTTGAATGATGTATAATTAT
>Marker160109
TCTTAGAGGAGCAGTAAGAAGATGGTTGACCAGTCAACCTGGTGGCACATTTAAAACTTGGGGCACTCTAGCCCAAGCTTTTATGGAAGAATACTATCCAXXXXXXXXXXATTAGAGAATCAATCTCTCGGATTCCTCAGAGAGAAAGAGAGAGCTTGTATGACCTGTAGAAACGATTTCCGGAGTTGTTAACTGAATGCCTCATCATGG
TCTTAGAGGAGCAGTAAGAAGATGGTTGACCAGTCAACCTGGTGGCACATTTAAAACTTGGGGCACTCTAGCCCAAGCTTTTATGGAAGAATACTATCCAXXXXXXXXXXATTAGAGAATCAATCTCTCGGATTCCTCAGAGAGAAAGAGAGAGCTTGTATGACCTGTAGAAACGATTTTCGGAGTTGTTAACTGAATGCCTCATCATGG
>Marker160249
GTCTTTGCTATTTCTACACTATCAATGTGAGCAATATCATCAGTCAAAGGACCAAGCCGGTGGAAGTGGCGTTGAGAAATTACAAAATGATGGAAATAAGXXXXXXXXXXTTTGTCTTGCTGAATTAGTAATGTCAGTGAGGTGCCATGGATGGAGTGAATGCTTAGGGATTTTTAGTTTTTTCGTGAAGGATAAATATGTGGGATCCAT
GTCTTTGCTATTTCAACACTATCAATGTGAGCAATATCATCAGTCAAAGGACCAAGCCGGTGGAAGTGGCGTTGAGAAATTACAAAATGATGGAAATAAGXXXXXXXXXXTTTGTCTTGCTGAATTAGTAATGTCAGTGAGGTGCCATGGATGGAGTGAATGCTTAGGGATTTTTAGTTTTTTCGTGAAGGATAAACATGTGGGATCCAT
>Marker160253
CAAACTCTTGCAGGTTACACTAAGCCTAGTGCTACAAATTCCACATTGAGTGTGGTTCCTCCTGAACAAGATGATGCTAAATACGAGATCAAGGGGAATCXXXXXXXXXXGAGAATCCCTATGCTCATCTAGTGGACTTCTATGCTTACAACGAAATTGTCAAACTACAAGGTTTGTCTGACGAAACAATGAAGCTCAAACTATTCAAGT
CAAACTCTTGCAGGTTACACTAAGCCTAGTGCTGCGAATTCCACATTGAGTGTGGTTCCTCCTGAACAAGATGATGCTAAATACGAGATCAAGGGGAATCXXXXXXXXXXGAGACTCCCGATGCTCATCTAGTGGACTTCTATGCTTACAATGAAATTGTCAAACTACGAGGTTTGTCTGACGAAACAATGAAGCTCAAACTATTCAAGT
>Marker160345
TTGTAAGTAGCGCCGAAGCCTCCGTTTCCGATGCAGTTCCGCATGCTGAAGTTCTCCGTTGCTAGCACGATTTCTTCGTAGAGCAAGGGAACTCCGATGTXXXXXXXXXXTGATCTCCTTCGGTTCCGAGAACTGAACCACCCGAGCATTCGGTGCCCGTTTTCTCAAGTAGAAGAACATGATCACCAACAGTATCAGGACTGAGACGAT
TTGTAAGTAGCGCCGAAGCCTCCGTTTCCGATGCAGTTCCGCATGCTGAAGTTCTCCGTTGCTAGCACGATTTCTTCGTAGAGCAAGGGAACTCCGACGTXXXXXXXXXXTGATCTCCTTCGGTTCCGAGAACTGAACCACCCGAGCATTCGGTGCCCGTTTTCTCAAGTAGAAGAACATGATCACCAACAGTATCAGGACTGAGACGAT
>Marker160764
CAATTTGCATTGACTACTGTTAAACAAAAATCCTAAACGATGAACGAGAAGAGTTATGAATTTTAATAAACAGACATACGTGCAAAGGTGGATTTAACGTXXXXXXXXXXCCGCTGCCTAACGTAGGATATTCCCTCTCTGCCTTCCACGTCCTCGTAATCTCAGGACTTCACCGCACCCCGAATAAAAAGTGTGTGTAGTCAGAATATC
CAATTTGCATTGACTACTGTTAAACAAAAATCCTAAACGATGAACGAGAAGAGTTATGATTTTTAATAAACAGACATACGTGCAAAGGTGGATTTAACGTXXXXXXXXXXCCGCTGCCTAACGTAGGATATTCCCTCTCTGCCTTCCACTTCCTCGTAATCTCAGGACTTCACCGCACCCCGAATAAGAAGTGTGTGTAGTCAGAATATC
>Marker160939
GAAAGGAAGTTTTGTGCACATCATCAGGTCGAACTCTGATTTGGTGGTAGCCCGAACGGAAATCAATCTTGGAGAAGTAGGTTGCCCTATGAAGTTCGTCXXXXXXXXXXACTAGCAAAAGGACTAGTGTTGGGTTGTATGAAACCTTTCGAGAGGAGTTTTTCGAGATTATGAAAATTATCTCTTCTAACGGAGTTCTGTAACCTTTTC
AAAAGGAAGTTTTGTGCACATCATCAGGTCGAACTCTGATTTGGTGGTAGCCCGAACGGAAATCAATCTTGGAGAAGTAGGTTGCCCTATGAAGTTCGTCXXXXXXXXXXACTAGCAAAAGGACTAGTGTTGGGTTGTATGAAACCTTTCGAGCGGAGTTTCTCAAGATTATGAAAATTATCTCTTCTAACGGAGTTCTGTAACCTTTTC
>Marker160953
TCAAATCTACCATATGAGGGTTTTCATTTTCCTTTGTTTGAAGTGACGGCAAATTTAATTATCGTCGGATTTTGTCATCTCTCTCCCTTCCCTCTGTTTCXXXXXXXXXXGAAAGACCCTAGGGAAATACGATTAAATTAGTTCATTCTAGTGGTTGCCTTGGTTGAAAGCCTGTTGATTTCCTTGTCTGTTTCCTTGATTTCCTTGAGG
TCAAATCTACCATATGAGGGTTTTTATTTCCCTTTGTTTGAAGTGACGGCAAATTTAATTGTCGTCGGATTTTGTCATCTCTCTCCCTTCCCTCTGTTTCXXXXXXXXXXGAAAGACCCTAGGGAAATACGATTAAATTAGTTCATTCTAGTGGTTGCCTTGGTTGAAATCCTGTTGATTTCCTTATCTGTTTCCTTGATTTCCTTGAGG
>Marker164075
ACCAAGTTGGAGCCCCGTGATCCAGCCTGCTATCCCGACGATGTAGGCTGCAGATTGGCAGCTAACGTGGAGATAGAACCAAGCTGGACCTGCTGATCTGXXXXXXXXXXATTCATCAAATTTACATGAAAGATTGTAAATTTATAAGAATTTCACCCCTCCGCTAGGGATGGACATTCAGTTGCGGTTAATGGTTAAAACTGATTAATA
ACCAAGTTGGAGCCCGGTGATCCAGCCTGCTATCCCGACGATGTAGGCTGCAGATTGGCAGCTAACGTGGAGATAGAACCAAGCTGGACCTGCTGATCTGXXXXXXXXXXATTCATCAAATTTACATGAAAGATTGTAAATTTATAAGAATTTCACCCCTCCGCTAGGGATGGACATTCAGTTGCGGTTAATGGTTAAAACTGATTAATA
>Marker164609
ATGATAAGTAACTAACTGAATATCACTCTCAATGTCCACCTAAAAAAAACCAACCCGACAATACCACAAACAAGCATCACGAGTGACATGCAATATTACCXXXXXXXXXXTCCTGGAATGAAGTGAGAGATCCCTAGGAATTGTCATGAGACAATTCTATGAGCAATATGAACTGCTTTATGCAGGTAATCCAAGCCTTCCTTAGTAGTA
ATGATAAGTAACTAACTGAATATCACTCTCAATGTCCACCTAAAAAAAACCAACCCGACAATACCACAAACAAGCATCACGAGTGACAAGCAATATTACCXXXXXXXXXXTCCTGGAATGAAGTGAGAGATCCCTAGGAATTGTCATGAGACAATTCTATGAGCAATATGAACTGCTTTATGCAGGTAATCCAAGCCTTCCTTAGTAGTA
>Marker164615
ACTGATCTATTGGGAAAGCCAACCAAGGCTCTTGTCCTTGAGGATGTTGAAAGGGTATCAGAAGCTTGATTCCATGTTATGGGAAATGTGGTCCGTCTACXXXXXXXXXXACTACCTTCTTCAAAAAGTGCCGAATTTTTTGTTTCCTTGTAACATTGGGTAGTTAAACTTGTATTAAGTTGAGAATTATAACAGCTGCTATATTTGTGC
ACTGATCTATTGGGAAAGCCAACCAAGGCTCTTGTCCTTGAGGATGTTGAAAGGGTAGCAGAAGCTTGATTCCATGTTATGGGAAATGTGGTCCGTCTACXXXXXXXXXXACTACCTTCTTCAAAAAGTGCCGAATTTTTTGTTTCCTTATAACATTGGGTAGTTAAACTTGTATTAAGTTGAGAATTATAACAGCTGCTATATTTGTGC
>Marker164633
ACTTTCACCCTTTTCCCCACGATTCTGTTGTCATCTCTGTCGCCTAAATCCACCATTCGGAACACAGGCACCGGCTTCCTTGGACGAAACCTCGATGGTGXXXXXXXXXXCATTAAGAATGACTTCATCCTCATTTGGTTCGCTTCCCGTTGATGTTGCTGCTTCAGGTAGCTTCTTCTTGGCGTTCTTATCACGTTTGCCCCTTTTCTT
ACTTTCACCCTTTTCCCCACGATTCTGTTGTCATCTCTGTCGCCTAAATCCACCATTCGGAACACAGGCACCGGCTTCCTTGGACGAAACCTCGATGGTGXXXXXXXXXXCATTAACAATGACTTCATCCTCATTTGGTTCGCTTCCCGTTGATGTTGCTGCTTCAGGTAGCTTCTTCTTGGCGTTCTTATCACGTTTGCCCCTTTTCTT
>Marker167695
TCTCCGCATTTGAGGGGAACTACGTAAATCTCAATGTTATTTACTTACCGTTTTGTGCCTTGCAATTTCGAGAATATTCGTTGTATATTGCATTATTAATXXXXXXXXXXCCTATTTTCTCTTGGGTGTGACCCATCTTCGCTAGCATGTCAGCTGCTTTTTTTGCTTTGCAAAACACATGTTGCAGCTTAAAATTCTCCCCTTGTTTTA
TCTCCGCATTTGAGGGGAACTACGTAAATCTCAGTGTTATTTACTTACCGTTTTGTGCCTTGCAATTTCGAGAATATTCGTTGTATATTGCATTATTAATXXXXXXXXXXCCTATTTTCTCTTGGGTGTGACCCATCTTCGCTAGCATGTCAGCTGCTTTTTTTGCTTTGCAAAACACATGTTGCAGCTTAAAATTCTCCCCTTGTTTTA
>Marker168002
TCGAGATAATAAAGTGCTTATTCCAACTCCCTGAACAGATTTCTAACTAAAAGAACAGACTTTTCTCAATTACTCCCTAGTGGAACTTTCAGTCACTTAAXXXXXXXXXXACACTCATTTCAATTACTCGCTAGATGATGAACCTACTGCACAGTATCAAACCAAAATTCCTATTACAAGCTATTTTGACCGAGCAACGGAGCAGCCACC
TCGAGATAATAAAGTGCTTATTCCAACTCCCTGAACAGATTTCTAACTAAAAGAACAGACTTTTCTCAATTACTTCCTAGTGGAACTTTCAGTCACTTAAXXXXXXXXXXACACTCATTTCAATTACTCGCTAGATGATGAACCTACTGCACAGTATCAAACCAAAATTCCTATTACAAGCTATTTTGACCGAGCAACGGAGCAGCCACC
>Marker171049
GATTCCATGTATTGTTTTCATAAGAATTATTATGTCGTAACGTAATAAAGCCAATTCACAATCCACATAACCTATATATTATTAATTTGAGCTTGCTCACXXXXXXXXXXCATTTAGATCCGTCCACAAAAATCCAAAATTCCACCATTGGTTATACTATTCAAAGAAGACACCAATTATTTTTGTGGAACAATTTTATAAAATAATTAT
GATTCCATGTATTGTTTTCATAAGAATTATTATGTCGTAACGTAATGAAGCCAATTCACAATCCACATAACCTATATATTATTAATTTGAGCTTGCTCACXXXXXXXXXXCATTTAGATCCGTCCACAAAAATCCAAAATTCCACCATTGGTTATACTATTCAAAGAAGACACCAATTATTTTAGTGGAACAATTTTATAAAATAATTAT
>Marker171245
CCGGTGCGACTTACCAAGTTAAGTGATTTATGTGCAATAGAGTTAAATAGTCGCGTCGAACCGGATGCTGTATCGATATCGACGACTAATTAAGTCAAAAXXXXXXXXXXAGAAGAAAGAAGTGTGGGGTAAATAGCCAAAAATTGCGATATAGTCCCCATACTTTTCCATTTTTTACAAATTAATTTCTTCGGTTTCGCGGACAGGTGA
CCGGTGCGACTTACCAAGTTAAGTGATTTATGTGCAATAGAGTTAAATAGTCGCGTCGAACCGGATGTTGTATCGATATCGACGACTAATTAAGTCAAAAXXXXXXXXXXAGAAGAAAGAAGTGTGGGGTAAATAGCCAAAAATTGCGATATAGTCCCCATACTTTTCTATTTTTTACAAATTAATTTCTTCGGTTTCGCGGACAGGTGA
>Marker171844
CAAAAATGATCTATCATGCATCCTATTCACCCTCAAGTAGCAATACTAGACTAACATGCATCCACCTCATCCAATGCTTTCAAGTTTAAGAGGGAATTTCXXXXXXXXXXGAGAATAGTTGATACCGAATTGAGTTGGTGAAATGGAGTTTGATGGTGAGATGTGATAGAACAACCATTTTCGGACCCTGCCAATCATAACAAAAACAAC
AAAAAATGATCTATCTGCATCCTATTCACCCTCAAGTAGCAATACTAGACTAACATGCATCCACCTCATCCAATGCTTTCAAGTTTAAGAGGGAATTTCAXXXXXXXXXXGAGAATAGTTGATACCGAATTGAGTTGGTGAAATGGAGTTTGATGGTGAGATGTGATAGAACAACCATTTTCGGACCCTGCCAATCATAACAAAAACAAC
>Marker172416
CCTGAGCATGCCATTAGTTTCGTAGTAATAGTTTCTCTTCATATGAGGATGAACAAACAAATAACTTGAATGCTTTTTCACTTCAGGGATAAATATCCATXXXXXXXXXXATGGTAAAGTGAACATTGTCCATTAATTCAATCTGCAACAATCTTTTGAATCCCCCAACTGATTATATCTCTGCAGGTTTCAAAATACAACCGATGCAAT
CCTGAGCATGCCATTAGTTTCGTAGTAATAGTTTCTCTTCATATGAGGATGAACAAACAAATAACTTGAATGCTTTTTCACTTCAGGGATAAATATCCATXXXXXXXXXXATGGTAAAGTGAACATTGTCCATTTATTCAATCTGCAACAATCTTTTGAATCCCCCAACTGATTATATCTCTGCAGGTTTCAAAATACAACCGATGCAAT
>Marker174398
AAACATTCTTCAACACAATGCAAATGAAATCTGAAGGCTCAAAACTGAATTCCTAGCTAATTTAAAGCATAAAATGGAACCAATCCACCGAAGCCAGAAAXXXXXXXXXXGTGAGCTGAAGATAATGCCGATTCAAGTTAATACAGAGATCAACCACAGACAAGCAACCCAATGATCTAGCAAAACTGTTACCTTGTCATTTATATCACA
AAACATTCTTCAACACAATGCAAATGAAATCTGAAGGCTCAAAACTGAATTCCTAGCTAATTTAAAGCATAAAATGGAACCAATCCACCGAAGCCAGAAAXXXXXXXXXXGTGAGCTGAAGATAATGCCCATTCAAGTTAATACAGAGATCAACCACAGACAAGCAACCCAATGATCTAGCAAAACTGTTACCTTGTCATTTATATCACA
>Marker176337
TTTGAGGTCGTGGGTTAATTTCCCATGGGGACAGACGATGGAGTATGAGATTTATAAGGCTGCAAACACTATTAAGGGCTACAATAAGGTAAGATGTTACXXXXXXXXXXTTTTTCTGGTTGAACTCTTGACTGATTGTATTACTGCCTCTAGGTGGGTCGTTTGAAAGCTGAGAAATCGATTCCGGATACCATTCTACGTCAAGCAAAA
CTTGAGGTCGTGGGTTAATTTCCCCTGGGGACAGACGATGGAGTATGAGATTTATAAGGCTGCAAACACTATTAAGGGCTACAATAAGGTAAGATGTTACXXXXXXXXXXTTTTTCTGGTTGAACTCTTGACTGATTGTATTACTGCCTCTAGGTGGGTCGTTTGAAAGCTGAGAAATCGATTCCGGATACCATTCTACGTCAAGCAAAA
>Marker177900
ATGTCATACGCGGAGTCAATTCACCTGTTGCATGCTTGGTATTTTGTCATCCTGATCGACTCCACCTACAAAAGCAACGTATACAAGAAGGCGGTTGTGCXXXXXXXXXXGTGGATTGGCGGTTGCAGTATATGACATATTTCCTTCTTCGGCTCATTTGTTGTGTGTGTGGCACATGAAGAGGAACATCAAGTGTAGGGTAACGTGGTT
ATGTCATACGCGGAGTCAATTCGCCTGTTGCATGCTTGGTATTTTGTCATCCTGATCGACTCCACCTACAAAAGCAACGTATACAAGAAGGCGGTTGTGCXXXXXXXXXXGTGGATTGGCAGTTGCAGTATATGACATATTTCCTTCTTCGGCTCATTTGTTGTGTGTGTGGCACATGAAGAGGAACATCAAGTGTAGGGTAACGTGGTT
>Marker178901
GTGGTTTATTATTGAGTGAGGTGGGTTGATCAAATTCAATTGGGTTGATGGATATGTAAAATTATTTCTCTTCTATTGTGGATCTGGTGGTGATATATTTXXXXXXXXXXAGTTCGATACACAACTAGGAACATGTCCACCCAAATATTTAGAGTAGTGGAGTTCAAAAAAGATGTGTAGCTTTTGTAGGGTCGTTCTAGATCAGGATCG
GTGGTTTATTATTGAGTGAGGTGGGTTGATCAAATTCAATTGGGTTGATGGATATGTAAAATTATTTCTCTTCTATTGTGGATCTGGTGGTGATATATTTXXXXXXXXXXAGTTCGATACACAACTAGGAACATGTCCACCCAAATATTTAGAGTAGTGGAGTTCAAAAAAGATGTGTAGCTTTTGTAGGGTCGTTTTAGGTCAGGATCG
>Marker178924
TTGAATTCGTTCCCGGCACCATCAACACCGGAACAAGCAGTCAGTAGCTTCACCAGATTCCGGTGTCTGACCGTCCTTAAAACCTCACATTCTGCTCTAAXXXXXXXXXXTTCACTAGCTTTCCTCAGGCTATGGTAAGTCATCATTTGGTTTGCTGAACATTCCGGATCGTCTGGCGCCACTTTTTTCCTCTTGACAAAGAAGAGCAGC
TTGAATTCGTTCCCGGCACCATCAACACCGGAACAAGCAGTCAGTAGCTTCACCAGATTCCGGTGTCTGACCGTCCTTAAAACCTCACATTCTGCTCTAAXXXXXXXXXXTTCACTAGCTTTCCTCAGGCTATGGTAAGTCATCATTTGGTTTGCTGAACATTCCGGATCGTCTGGCGTCACTTTTTTCCTCTTGACAAAGAAGAGCAGC
>Marker178935
TGCTGGTCCTGCAGGGTGGCAATTTATATTCAGGAATTCCGCCACATAGTTTACTGTTTCCTGAAACTGAAGCTGACGTGGAATTTCTGAACAAAGGCACXXXXXXXXXXACGAAGGAATGACTCCCTGGAAGGAATTTTTCCGTAACAAAAGCGTTTCTAGTCCGACACAGCTACCGATTCCGGCAGGAATTTCTCCTGACAACATGTT
TGCTGGTCCTGCAGGGTGGCAATTTATATTCAGGAATTCCGCCACATAGTTTACTGTTTCCTGAAACTGAAGCTGACGTGGAATTTCTGAACAAAGGCACXXXXXXXXXXACGAAGGAATGACTCCCTGGAAGGAATTTTTCCGTAACAAAAGCGTTTCTAGTCTGACACAGCTACCGATTCCGGCAGGAATTTCTCCTGACAACATGTT
>Marker178966
AACTCTTGAAGAGCATGGAATTAATTTAACCAAACTTGCAGACAAGGTTGTTTTCTTCACTTCTTCCATCTTGTTTGCGTGTCAAATCATTCTTAAGAAGXXXXXXXXXXTGATTTTTTAGTCATGGTGAAGGAAGTAATTAACCTACCCTGCCTGGTCATCTGCTCTTTCCTTTTCCATTATACAACACTATCAGCATCAACCGGCAGA
AACTCTTGAAGAGCATGGAATTAATTTAACCAAACTTGCAGACAAGGTTGTTTTCTTCACTTCTTCCATCTTGTTTGCGTGTCAAATCATTCTTAAGAAGXXXXXXXXXXTGAATTTTTAGTCATGGTGAAGGAAGTAATTAACCTACCCTTCCTGGTCATCTGCTCTTTCCTTTTCCATTATACAACACTATCAGCATCAACCGGCAGA
>Marker178978
AAATGATGACTGATGAAGCTACAGATTCTGCAGATTCAGGTGGGTTCATGTTCTAGCAGATAGTTGCAATAAAATTCAAGCACACTGTCGACAATAAATAXXXXXXXXXXGAAAAGGAAGACCAATTCCTCCGCGAAATTCCAGCAGATGTTTGTTTTCTCGTTCCCGGATGAATCCGCTCGTCAATTGTCTACTTTCTGAGCCGGACAC
AAATGATGACTGATGAAGCTACAGATTTCTGCAGATTCAGGTGGGTTCATGATCTAGCAGATAGTGGCAATACAATTCAAGCACACTTTCGACAATAAATXXXXXXXXXXGAAAAGGAAGACCAATTCCTCTGCGAAATTCCAGCAGATGTTTGTTTTCTCGTTCCCGGATGAATCCGCTCGTCAATAATCTACTTTCTGAGCCGGACAC
>Marker179020
CAAATATTTCAGATGCTGCGACTAGTGTTGTTGCTTCATGGATGAGACCTGCCCTCCCATAGCTTGCAAGAAGGGCACTGAACACATATTCATTATTTTCXXXXXXXXXXATTTAAGTATAGCAGAAAACGAAAACTCATTAGGTCGAAAACCAAACTGAAGCATCTCTTGGATCAAAGAAAAAGGAACTCGGGAGCTTTTATTAGCAAA
CAAATATTTCAGATGCTGCGACTAGTGTTCTTGCTTCATGGATGAGACCTGCCCTCCCATAGCTTGCAAGAAGGGCACTGAACACATATTCATTATTTTCXXXXXXXXXXATTTAAGTATAGCAGAAAACGAAAACTCATTAGGTCGACAACCAAACTGAAGCATCTCTTGGATCAAAGAAAAAGGAACTCGGGAGCTTTTATTAGCAAA
>Marker180583
GAATTAAAAAAAAACAATTTGTGACTGCTGATATTCGTGACTAAGATAAAAGTATCAAAGATAAAAGTATGATATTGTTAAATAAGGTGGAAATACTAGAXXXXXXXXXXATTTGTTAAAGATATGCATTCATCATTGTCTCACGTTGGAGGAAATTCATTAGTTGGCATTACACTCACCTATACCATCTTGAATGATAGTGATACATCT
GAATTAAAAAAAAAACAATTTGTGACTGCTGATATTCGTGACTAAGATAAAAGTATCAAAGATAAAAGTATGATATTGTTAAATAAGGTGGAAATACTAGXXXXXXXXXXATTTGTTAAAGATATGCATTCATCATTGTCTCACGTTGGAGGAAATTCATTAGTTGGCATTACACTCACCTATACCATCTTGAATGATAGTGATACATCT
>Marker188071
CACCTTAGCAAACCTTTACTTGAAGATTTTGAAGTTTGAGAGATAAATGGATGTATTAATTATTGAGTTGATTGATGATAAAAACTAACAGAAAGGATTTXXXXXXXXXXACACCTATCTGTTATTCTTCATCTCTCCCTCACTAGCTGACACTTTAATTAATTTCCAAACTCAATGTGAAAACTATTAAGGGCAACGAGATAATATAGG
CACCTTAGCAAACCTTTACTTGAAGATTTTGAAGTTTGAGAGATAAATGGATGTATTAATTATTGAGTTGATTGATGATAAAAACTAACAGAAAGGATTTXXXXXXXXXXACACCTATATGTTATTCTTCATCTCTCCCTCACTAGCTGACACTTTAATTAATTTCCAAACTCAATGTGAAAACTATTAAGGGCAACGAGATAATATAGG
>Marker188996
AAAGGCGAAGTCAGCCTGAAGAAGGATGGATCCCTTGAATGGATGGATGTTTAGATGCCTAGAAAAGTATGGGCTGTTGGTTTTAAATAATTGGGGGTTGXXXXXXXXXXATTTTGTTGTTCGTTTAATCTGATTTTTAGCGTTGAAATCTATTTTCTGTAGAAAGAATCTCCGACGACTGCCTATATAGTTTGTATACAGTATAACTGT
AAAGGCGAAGTCAGCCTGAAGAAGGATGGATCCCTTGAATGGATGGATGTTTAGATGCCTAGGAAAGTATGGGCTGTTGGTTTTAAATAATTGGGGGTTGXXXXXXXXXXATTTTGTTGTTCGTTTAATCTGATTTTTAGCGTTGAAATCTATTTTCTGTAGAAAGAATCTCCGACGACTGCCTATATAGTTTGTATACAGTATAACTGT
>Marker189577
AGTATATTAGTATATTACAGATGACGTTGTATTTCTTGAATTCTATGTTGTCCTTTTGATGCTTGCGTTCCTTCTAAAAAGCTAAGTAAAATTTCACAAAXXXXXXXXXXTTTATCAAGGAAATGAATTTCAGTTTTTTTTATATTTGTCTATTATTATTAACCGTTCAATGCTTAGGGAAAAATATATATTCATTGATTTGAGTATATT
AGTATATTAGTATATTACAGATGACGTTGTATTTCTTGAATTCTATGTTGTCCTTTTGATGCTTGCGTTCCTTCTAAAAAGCTAAGTAAAATTTCACAAAXXXXXXXXXXTTTATCAAGGAAATGAATGTCAGTTTTTTTTATATTTGTCTATTATTATTAACCGTTCAATGCTTAGGGAAAAGTATATATTCATTGATTTGAGTATATT
>Marker190812
TGCTGTGATCCTCTTGATGTTAGGGGGGCGAATCCCACCATGAAGAAATGTAGGCGAGGGAATGGAATGAGGTTCACTGCGAGTTTTCTAAGGTCGGAGTXXXXXXXXXXTGATGAGACGTGTTGAAAAATAATATAAAATCCAATCTGAACCTTCTTCCAACAACTCGAGTTGTTGGATGCAGAGATTCTAAGACAGCTTTAATGCACA
TGCTGTGATCCTCTTGATGTTAGGGGGGCGAATCCCACCATGAAGAAATGTAGGCGAGGGAATGGAATGAGGTTCACTGCGAGTTTTCTAAGGTCGGAGTXXXXXXXXXXTGATGAGACGTGTTGAAAAATAATATAAAATCCAATCTGAACCTTCTTCCAACAACTCGAGTTGTTGGATGCAGAGATTCTACGACAGCTTTAATGCACA
>Marker195604
ATGCCTGCAGAAGACAAATGAAGGGTAAGAACCAAGAAGTAAGAAAAAACACAGAAACATGAAACATAACTAACTTAAGGAAAGGAACCAGGTGAAAATTXXXXXXXXXXAAAAAGAAAGAGATCAGAGACAGTTAGTGATTGGTAGTATAAGTGGATTTGCATATCAGGAAAGATTCAGCACAGCAGGAAAAAGAGATGATGTAGGGAT
ATGCCTGCAGAAGACAAATGAAGGGTAAGAACCAAGAAGTAAGAAAAAACACAGAAACATGAAACATAACTAACTTAAGGAAAGGAACCAGGTAAAAATTXXXXXXXXXXAAAAAGAAAGAGATCAGAGACAGTTAGTGATTGGTAGTATAAGTGGATTTGCATATCAGGAAAGATTCAGCACAGCAGGAAAAAGAGATGATGTAGGGAT
>Marker195750
TGTTAGTGCACTCATCATCATCAACATCACCATTATCTTTTTTAATTTAGAGTTCAAAGAAAACAGAGCAGTAAATGGGCTGAATTTATAATCTTTTGCCXXXXXXXXXXATGCTTTTGTTCCAGATTGCAGAAGAGACGGAAAACAAAACTGGTCAAGTTCGTTTTTTTGCGATGAATAAAACTGGTCAAGTTTTATTTATACAACATA
TGTTAGTGCACTCATCATCATCAACATCACCATTATCTTTTTTAATTTAGAGTTCAAAGAAAACAGAGCAGCAAATGGGCTGAATTTATAATCTTTTGCCXXXXXXXXXXATGCTTTTGTTCCAGATTGCAGAAGAGACGGAAAACAAAACTGGTCAAGTTCGTTTTTTTGCGATGAATAAAACTGGTCAAGTTTTATTTATACAACATA
>Marker195869
TGATTCCCAGGGACAAATGAAAGGGAAGACGGAGGAAGTCGTCGAAGAGGAAGAGATGGGAAGCAGATGGGGGCGTAGGGTTGGGGAACAGCGATTTTGCXXXXXXXXXXGAAGGATCAGGAAACAAGAAGAAGGCGGGATGGTGGATATTGGATAAAATCCAATAAATAAGAAGCGGAGGCGGGAAGTCCAGCCCAATTTAACTTTCCG
TGATTCCCAGGGACAAATGAAAGGGAAGACGGAGGAAGTCGTCGAAGAGGAAGAGATGGGAAGCAGATGGGGGCGTAGGGTTGGGGAACAACGATTTTGCXXXXXXXXXXGAAGGATCAGGAAACAAGTAGAAGGCGGGATGGTGGATATTGGATAAAATCCAATAAATAAGAAGCGGAGGCGGGAAGTCCAGCCCAATTTAACTTTCCG
>Marker196165
CTCATACCACGCATTTGATAGTGCTGTTTCCTGTAACACATTTCATACAAAGTTAGAGCTACAACATCACTGGAAGCCACGGACATCATGATTCTACTAAXXXXXXXXXXAATATTGAATGGAATTTTCAGTCAAGAATTATGAAATTACAAGCTATACCATGTCGAGTAGCACTTCGCCTCCGAGTCCTGGTGACAGTGGGTGCTTCTT
CTCATACCACGCGTTTGATAGTGCTGTTTCCTGTAACACATTTCATACAAAGTTAGAGCTACAACATCACTGGAAGCCACGGACATCATGATTCTACTAAXXXXXXXXXXAATATTGAATGGAATTTTCAGTCAAGAATTATGAAATTACAAGCTATACCATGTCGAGTAGCACTTCGCCTCCGAGTCCTGGTGACAGTGGGTGCTTCTT
>Marker196213
TTCACCATCTCACAGGCAAGCCTCCGCTTCACCGCCAGTGTGGCTTTTGCGCTATCTATAGCCATCCCGAGTTGGATATCGACGGTCTGCAAGGAAAGGGXXXXXXXXXXTTAGTTGTAACGAACGTCGCACCTGTTGAGGAACCTAGGGTGTAGCGCAAATTTTCATCCACGCGTTACCATGCCGCCAACCCCTTATGGTTCTATTTAT
TTCACCATCTCACAGGCGAGCCTCCGCTTCACCGCCAGTGTGGCTTTCGCGCTATCTATAGCCATCCCGAGTTGGATATCGACGGTCTGCAAGGAAAGGGXXXXXXXXXXTTAGTTGTAACGAACGTCGCACCTGTTGAGGAACCTAGGGTGTAGCGCAAATTTTCATCCACGCGTTACCATGCCGCCAACCCCTTATGGTTCTATTTAT
>Marker196307
CCTTGGCATTGCCTCTCTCGTTTCATTTTTATATACAATGATTTTAATTAATATTTAATGTGGGAAACGCCATGGATTATATTAATCATTTATTTAAACCXXXXXXXXXXATTAAATAATTATGATTATACCCTCCTCTTACTCGGTCTAATTAGCACGTAGTGATTGACAAGGATGGCATGATATTGGCATTTCATAAATTATATTGCA
CCTTGGCATTGCCTCTCTCGTTTCATTTTTATATACAATGATTTTTGTTGATGTTAATTAATATTTAATGTGGGAAACGCCAAGGATTATATTAATCATTXXXXXXXXXXATTAAATAATTATGATTATACCCTCCTCTTACTCGGTCTAATTAGCACGTAGTGATTGACAAGGATGGCATGATATCGGCATTTCATAAATTATATTGCA
>Marker196465
TTTTTTTTTAAAAAAAACTTATGAAATTAATTATTGTGATTAGCATAATTAGAGAATTTTTAGGGTATGATTAGTGTAATTAGAGAATGTTAGTGAATATXXXXXXXXXXTAGTGAATATATAGAATAATTAGGGTTTTGTTAGTGAATATTTCAGAAAATTAGGGTTTAGGGTTTACTCCCTCGATTGTTGTGCCGCTGCGGTCCAGTG
TTTTTTTTAAAAAAAAACTTATGAAATTAATTATTGTGATTAGCATAATTAGAGAATTTTTAGGGTATGATTAGTGTAATTAGAGAATGTTAGTGAATATXXXXXXXXXXTAGTGAATATATAGAATAATTAGGGTTTTGTTAGTGAATATTTCAGAAAATTAGGGTTTAGGGTTTACTCCCTCGATTGTTGTGCCGCTGCGGTCCAGTG
>Marker197497
TACTGCGAACACTGCAGCCTGCACACCGGCTAAATATTCACTAATTTGTCCTTTTGTGTGTAATACTTGCAAGTTCGTAATTATACATAAAATTTTCAGTXXXXXXXXXXTTGTTATTGACGTAAACACCTTAATTAAAATCAAAAGAAACGGTAATAATATAAGAGAAAAATAATATAACATTAGTTTTTATATATAAAGTGTTATCAT
TACTGCGAACACTGCAGCCTGCACACCGGCTAAATATTCACTAATTTGTCCTTTTGTGTGTAATACTTGCAAGTTCGTAATTATACATAAAATTTTCAGTXXXXXXXXXXTTATTATCGACGTAAACACCTTAATTAAAACCAAAAGAAACGATAATAATATAAGAGAAAAATAATATAACATTAGTTTTTATATATAAAGTGTTATCAT
>Marker197790
CAGGCATGAAACCTATATCCATAGCCCCCTACCGTATGGTGCCAGTAGAGTTGAAGGAGCTCAAGGAGATGTTCTTGGAGCTGCTAGAGAAGGGTTTCATXXXXXXXXXXGAGAGCGAAAGTGTTCTCTAAGATTGTTCTGAGGTTGGGGTATCAATAGTTAAAGCTAGCATAGGAAGTTGTTCCTAATACAACTTTCCAAACAAGGTAT
CAGGCATGAAACCTATATCCATAGCCCCCTACCGTATGGTGCCAGTAGAGTTGAAGGAGCTCAAGGAGATGTTCCTGGAGCTGCTAGAGAAGGGTTTCATXXXXXXXXXXGAGAGCGAAAGTGTTCTCTAAGATTGTTCTGAGGTTGGGGTATCAATAGTTAAAGCTAGCATAGGAAGTTGTTCCTAATACAACTTTCCAAACAAGGTAT
>Marker201452
CGGTCTACCGTCCGATTGACGGGAACTCTGCCGAGATCCGCCGTCTCTTCGCTAGAGTAGCTCAGTCGAAGTCATCGGCGTCATCTACCGGCGGCGGGGGXXXXXXXXXXTATTGCTGAACGCCGGCAGGTCGTTCGAGAAAGTCCGGTATAACCCGCTGTCTAATTTGCTGTTTGGGGATGGGCTTGTTGGGCTCGAGGGTGATCAGTG
CGGTCTACCGTCCGATTGACGGGAACTCTGCCGAGATCCGCCGTCTCTTCGCTAGAGTAGCTCAGTCGAAGTCAACGGCGTCATCTACCGGCGGCGGGGGXXXXXXXXXXTATTGCTGAACGCCGACCGATCGTTCGAGAAAGTCCGGTATAACCCGCTGTCTAATTTGCTGTTTGGGGATGGGCTTGTTGGGCTCGAGGGTGATAAGTG
>Marker201991
TGCATCAATCCTCAAAAACATATGAAAGGAAACAACACAACTTCCAATGAAAACAGTCTCTCTCTCTCTCTCTCTATGTCGATACCTAGCCCGTATCAGAXXXXXXXXXXCCAAGCACAAGCATTAGCCTTAATATTAGAATCAAACAATGAGAACAACTCCTTATGACAAAACTCGAAACTGGTGAGAACAACTCCACATGCAAACCAA
TGCATCAATCCTCAAAAACATATGAAAGGAAACAACACAACTTCCAATGAAAACAGTCTCTCTCTCTCTCTATGTCGATACCTAGCCCGAATCAGAGGCTXXXXXXXXXXCCAAGCACAAGCATTAGCCTTAATATTAGAATCAAACAATGAGAACAACTCCTTATGACAAAACTTGAAACTGATGAGAACAACTCCACATGCAAACCAA
>Marker202012
GCAGCAATTGAGCTAAGAAGAAAGACGCTGGGAGAGTTGGGTTGGAGCTTTGCCAGCTTCCTGGAAGCCAATAATCCTAGCCCCATCAGTGTTTCTTCTCXXXXXXXXXXATGATGTATTACGCAATGTTCAAGCTCCAAGAGTGAAGACTGAAGACTGAAGAGCTGGGTTTTATGACTTAATTAGATATGTGCAGCCACCGCTTGGCGG
GCAGCAATTGAGCTAAGAAGAAAGACGCTGGGAGAGTTGGGTTGGAGCTTTGCCAGCTTCCTGGAAGCCAATAATCCTAGCCCCATCAGTGTTTCTTCTCXXXXXXXXXXATGATGTATCTCGCAATGTTCAAGCTCCAAGAGTGAAGACTGAAGACTGAAGAGCTGGGTTTTATGACTTAATTAGATATGTGCAGCCACCGCTTGGCGG
>Marker202553
CGATATTATTTGATTCTTATACATTTCTCTTTCATCATCTCATTTTTGCTTTCGAGGTATGTATACTTTTTCTTTCATTCGACTTCTACAACATGAAATAXXXXXXXXXXCAAATCGATGGGTGATATTATAGTTTAAACAATTTTTCTTGGTAACCCCTAACATAACAAGTTCATCGAGTGGATCATTAGTAACATAATGCTGGATTTA
CGATATTATTTGATTCTTATACATTTCTCTTTCATCATCTCATTTTTGCTTTCGAGGTATGTATACTTTTTCTTTCATTCGACTTCTACAACATGAAATAXXXXXXXXXXCAAATCGATGGGTGATAATATAGTTTAAACAATTCTTCTTGGTAACCCCTGACATAACAAGTTCATCGAGTGGATCATTAGTAACATAATGCTGGATTTA
>Marker204119
ACACCCCTGTATGCCCCACTGGGTTGAACACACCCGCCCAAAACAATTATATTGATCTGTGCCATTTGCCCTCTGCTTTTCATCAACCCTATTCAACTAGXXXXXXXXXXTAGTCAATTACGATGTTGATTGTTAAAGTTAATGAAAAATGAGACTGTTTTATGATAGGAATATTGTAATGCCACGTAGGACTCCACGTCAGCATAAAAG
ACACCCCTGTATGCCCCACTGGGTTGAACACACCCGCCCAAAACAATTATATTGATCTGTGCCATTTGCCCTCTGCTTTTCATCAACCCTATTCAACTAGXXXXXXXXXXTAGTCAATTACAATGTTGATTGTTAAAGTTAATGAAAAATGAGACTGTTTTATGATAGGAATATTGTAATGCCACGTAGGATTCCACGTCAGCATAAAAG
>Marker204224
TTTCATCATTGTTGATGGTGATCTTCATCTCTTACAGTTAATCTAGATTCATTTTACTTAGAAGCGATGCTTAGGTAGTAGATTTAGGTCTTCCTTTGTCXXXXXXXXXXCGGAAAGTTTGCTGTGTTACGTGCACAAGGCTACGAATTGATGCACAACGGTATTTTCATGGAAGTAGATGTCTTTGTGTGTTGTAAAGTTATAAAAGTG
TTTCATCATTGTTGATGGCGATCTTCATCTCTTATAGTTAATCTAGATTCATTTTACTTAGAAGCGATGCTTAGGTAGTAGATTTAGGTCTTCCTTTGTCXXXXXXXXXXCGGAAAGTTTGCTGTGTTACGTGCACAAGGCTACGAATTGATGCACAACGGTATTTTCATGGAAGTAGATGTCTTTGTGTGTCGTAAAGTTATAAAAGTG
>Marker204389
CCCTTCACCCCTGGACTCTTTGCCTATGTAAAGAAGGCAGTTGCGTGTTAAAAATAGACATAAATAGAAACATCTACCCTAGCCTATGATATTCTAAGTGXXXXXXXXXXTGGTGTCCATGATTCCGTCTTAATCCTAGATCTCTTTACTTATCAAACCTAGAAGCATTGCTGCTTGAAACCTCCCGAACTAACAACGTTGAAGCATTTA
CCCTTCACCCCTGGACTCTTTGCCTATGTAAAGAAGGCAGTTGCGTGTTAAAAATAGACATAAATAGAAACATCTACCCTAGCCTATGATATTCTAAGTGXXXXXXXXXXTGGTGTCCATAATTCCGTCTTGATCCTAGATCTCTTTACTTATCAAACCTAGAAGCATTGCTGCTTGAAACCTCCCGAACTAACAACCTTGAAGCATTTA
>Marker204477
TGCTCAAATAATAGACAAGTTAGTGAGTTACTATCCTATCCCATCCGACAGAATGAAATTTCTCATAAAAAAAGAGCATAATATACCAACCAATCTATTTXXXXXXXXXXCGTAACATGAGTCATTATTCTAATCACTACCTTATCTGAAAGTATGAAATTAGAAACGAGCGTATAGATACCAACCGTAGGGTTTTTCTTTGCAATTTCA
TGCTCAAATAATAGACGAGTTAGTGAGTTACTATCCTATCCCATCCGACAGAATGAAATTTCTCATAAAAAAAGAGCATAATATACCAACCAATCTATTTXXXXXXXXXXCGTAACATGAGTCATTATTCTAATCACTACCTTATCTGAAAGTATGAAATTAGAAACGAGCGTATAGATACCAACCGTAGGGTTTTTCTTTGCAATTTCA
>Marker205172
TGTAGTAATCGGAGATGTAGTTGTAATGGCTGTGGAGCTGATAGGACGGCGGTTTCAGCACGAGTGATCTGTGCCGGTTGCTATTGTTGTTGTGTGGGAAXXXXXXXXXXTGTGTCTTTGGTTTGGGTTATATAATGCTCTGCTGTGCACTTTCTTTATTGGGAACAAATTAAGGTATAAAGTGCACCAAAAGGTTTCAGGAATCATTTA
TGTAGTAATCGGAGATGTAGTTGTAATGGCTGTGGAGCTGATAGGACGGCGGTTTCCGCACGAGTGATATGTGCCGGTTGCTATTGTTGTTGTGTGGGAAXXXXXXXXXXTGTGTCTTTGGTTTGGGTTATATAATGCTCTGCTGTGCACTTTCTTTATTGGGAACAAATTAAGGTATAAATTGCACCAAAAGGGTTCGGGAATCATTTA
>Marker205174
ATTTGATCCCAACATTCGTTCTGACTAACTACATTACATTACAGCTGTTAGTTTTGTTAGCTCAGCCACGTGGTTTACCGCATTTCCCCACCACCATCGCXXXXXXXXXXTCTTCACCCACCACACCTTTCTTTCCTCAAATCACTTCTCCCCAGGCTGTATTTTCCCCCACATCATTACCAACCACCCTAAAACACACCATTGTTGTTT
ATTTGATCCCAACATTCGTTCTGACTAACTACATTACATTACAGCTGTTAGTTTTGTTAGCTCAGCCACGTGGTTTACCGCATTTCCCCACCACCATCGCXXXXXXXXXXTCTTCACCCACCACACCTTTCTTTCCTCAAATCACTTCTCCCCAGGCTGTATTTTCCCCCAAATCATTACCAACCACCCTAAAACACACCATTGTTGTTT
>Marker208303
CACTGAACATGCTAGTCCATCAAGCCGACGATCTCAAGAACATCAACACAAATTTATGGGTAAAAGAGTCGGAATGTGTGCAATGGCTCGACAGGAAAGAXXXXXXXXXXTGTGCAATGGCTCGACAGGAAAGAGCCCAACTCGGTTCTCTACGTGAACTTCGAAAGCATTACCGTGATGACTCCTGATCAGATGACCGAGTTTGCGTGG
CACTGAACATGCTAGTCCATCAAGCCGACGATCTCAAGAACATCAACACAAATTTATGGGTAGAAGAGTCGGAATGTGTGCAATGGCTCGACACGAAAGAXXXXXXXXXXTGTGCAATGGCTCGACACGAAAGAGCCCAACTCGGTTCTCTACGTGAACTTCGAAAGCATTACCGTGATGACTCCTGATCAGATGACCGAGTTTGCGTGG
>Marker208382
TAAAGCCGGACAACAACATCGATTCCACCCAAGACATTCCTTCGCTGTGCGACACTACCACAAAGAACTGTCTGGTCCCGTTTCGGGACCTCGTCCTCAGXXXXXXXXXXACAACGTCGTTTCGCCTGTGGTTAACTGTATTGTGTCGGATAGTTCGATGACGTTTACTCTGGATGTAGCAAAGGAGTTTGGAATTCCTAACGTGCTCTT
TAAAGCCGGACAACAACATCGATGCCACCCAGGACATTCCTTCGCTGTGCGACACTACCGCAAAGAACTGTCTGGTCCCGTTTCGGGACCTCGTCCTCAGXXXXXXXXXXACAACGTCGTTTTACCTGTGGTTAACTGTATTGTGTCGGATAGTTCGATGACGTTTACTCTGGATGTAGCAAAGGAGTTTGGAATTCCTAACGTGCTCTT
>Marker208536
AAAACTCCATTTTCTATAATTTCACTTACTACTTTTAGTCTTCTTATTTACTGTTTGGACGTTTTGATAATGGTTGGAAAAAATGCACAGATCCAAGCTAXXXXXXXXXXTTCAGGATTGAGCAAGAACATCCGTTTGAAAGATTTCCCAACTTTCATCCGAACAACGAATGAAGGCGACACCATCATGTTCAATTTCTTACAGAAAGAA
AAAACTCCATTTTCTATAATTTCACATACTACTTTTAGTCTTCTTATTTACTGTTTGGACGTTTTGATAATGGTTGGAAAAAATGCACAGATCCAAGCTAXXXXXXXXXXTTCAGGATTGAGCAAGAACATCCGTTTGAAAGATTTCTCAACTTTCATCCGAACAACGAATGAAGGCGACACCATCATGTTCAATTTCTTACAGAAAGAA
>Marker208537
CACGATCTGTTGGATTTATCTGATAGAAAGAGCTCTCAGATCAATAGCCGCATTGGCTCGACCCTATACGACAATTGCAGCTGGTCGATCGGTCCCAGTTXXXXXXXXXXGTAATGGGTATAGACATGATTTCTGCAATGATTAACAAACTGTAACAAATATGGAACCGATCACTTGCACAACATGCTGATATGTATTCTAATGGCTGGA
CACGATCTGTCGGATTTATCTGATAAAAAGAGCTCTCAGATCAATAGCCGCATTGGCTCGATCCTATATGACAATTCCAGCTGGTCAATCGGTCCCGGTTXXXXXXXXXXGTAATGGGTATAGACATGATTTCTGCAATGATTAACAAACTGTAACAAATATGGAACCGATCACTTGCACAACATGCTGATATGTATTCTAATGGCTGGA
>Marker208551
TAGAGAACATCAGCACGAATCTATGGGTCAAACAATTAGAATGGTCTGAATGGCTTGACTCGAAAGAGCCCAACTCTGTTTTGTATGTGAGCTTCAAGAGXXXXXXXXXXGAACATGTTTTGAAACACCCGTTGATCCGAGGATTTTTTGGTCACGTGGGGTGGAACTCGATGCTCGAGAGCTTGTCGAATGGAGTGCCAATGATATGCT
TAGAGAACATCAACACGAATCTATGGGTCAAACAATCAGAATGGTCTGAATGGCTTGACTCGAAAGAGCCCAACTCTGTTTTGTATGTGAGCTTCGAGAGXXXXXXXXXXGAACATGTTTTGAAACACCCGTCGATCGGAGGAGTTTTTTGTCACGTGGGGTGGAACTCGATGCTCGAGAGCTTGTCGAATGGAGTGCCAATGATATGCT
>Marker208606
ACTAAAATTTAATTAATTTACAAGAAAACTTCAAAAGAATGACCATCAATTGACTAATTATCGTGGGAAGGTCCAATCATAGACTCACTAGATTTCGGGTXXXXXXXXXXGTGTTCAAGACAAAAAGGGTTTTGTTGACTACTATGAACGTTTAGAAGTCATTTGCGTTATTAGGTATGGACCCATAAAAATACATACAATAACTTCCAT
ACTAAAATTTAATTAATTTACAAGAAAACTTCAAAAGAATGACCATTGATTGACTAATTATCGTGGGAAGGTCCAATAATAGACTCACTAGATTTCGGGTXXXXXXXXXXGTGTTCAAGACAAAAAGGGTTTTGTTGACTACTATGAACGTTTAGAAGTCATTTGCGTTATTAGGTATGGACCCATAAAAATACATACAATAACTTCCAT
>Marker208624
GTTCCGGGTGCGTGTGGGGTCTTGGGATACCACAGCTTCCCACTTCTGGTCCATAAAGGTTTGGTGCCTCTCAAAGGTAAGTTTCTAAGTTCTGCTGCTAXXXXXXXXXXAAACTGCGGTAGATTTCATTCCAGGGCTGAACAAAAACATGCGCCTGAAAGATTTCCCAACTTTCATAAGAACCACAGACCCAAACGACATGATGTTCAA
GTTCCGGGTGCGTGTGGGGTCTTGGGATACCACAGCTTCCCACTTCTGGTCCATAAAGGTTTGGTGCCTCTCAAAGGTAAGTTTCTAAGTTCTGCTGCTAXXXXXXXXXXAAACTGCGGTCGATTTCATTCCAGGGCTGAACAAAAACATGCGCCTGAAAGATTTCCCAACTTTCATAAGAACCACAGACCCAAACGACATGATGTTCAA
>Marker208639
GAATTACGAACTCCATTAGTCAATTTTCTGATTCCACCAATGCGCTTGAGTCGATTAATTTTCTAATTCAACATTCCGCAACTCTCATAAATCATAATATXXXXXXXXXXAAGTTTGATCCATGAAACCCTAAAAATAGCAACAAACCGTTACAAGTTATACGTAATACACATACACACCGACTCTGTTAAATGCTTTCCCATACAGCCA
GAATTACGAACTCCATTAGTCAATTTTCTGATTCCACCAATGTGCTTGAGTCGATTAATTTTCTAATTCAACATTCCGCAACTCTCATAATTCATAATATXXXXXXXXXXAAGTTTGATCCATGAAACCCTAAAAATAGCAACAAACCGTTACAAGTTATACGTAATACACATACAGACCGACTCTGTTAAATGCTTTCCCATACAGCCA
>Marker211081
GGCGATTGATCATGCGAACTATCATCATCATCATCAGAATCGTCAGGCTAAACATCAATGAGGGCTTCAGGTTCAGCAACCTCCGGATGAATTTCTCCAAXXXXXXXXXXATCCAATGAAAACACACGGTCGCGTCTTGGAATCTAGTTTCGACCTCTCGTCCCTCGGAATGTAAACAAAGACCTTGCAACCAAACACTCGAAGATGCTT
GGCGATTGATCATGCGAACTATCATCATCATCATCAGAATCGTCAGGCTAAACATCAATGAGGGCTTCAGGTTCAGCAACCTCCGGATGAATTTCTCCAAXXXXXXXXXXATCCAATGAAAACACACGGTCGCGTCTTGGAATCTAGTTTCGACCTCTCGTCCCTCGGAATGTGAACAAAGACCTTGCAACCAAACACTCGAAGATGCTT
>Marker212402
TTCTATTAGAAATAAGAAATACATTAATCTTGGCGCTGTCAACCAAACCCCTCTCCAGAACAAATTAGAAATAAGCACTACTTCTATTGAGAGGTTTATGXXXXXXXXXXTGTGGTGGAACGAGGAGTGAACGTGTTGCGGCTGGGCGAGGAAGAACATGTGACACCTTTCGAGGGTATTCGTGAACAACCAAAATACCTAACACTGGTA
TTCTATTAGAAATAAGAAATACATTAATCTTGGCGCTGTCAACCAAACCCCTCTCCAGAACAAATTAGAAATAAGCACTACTTCTATTGAGAGGTTTATGXXXXXXXXXXTGTGGTGGAACGAGGAGTGAACGTGTTGCGGCTGGACGAGGAAGAACATGTGACACCTTTCGAGGGTATTCGTGAACAACCAAAATACCTAACACTGGTA
>Marker212522
TTTGCCATTCTTCTTCCTAAATGGCACTATATTAGACAACCATTCCACATACCTAGCATGTCTAATAAACTTAGCTTTTAACAAGCGTTCAATTTTCATTXXXXXXXXXXGATAATCCCATGTAAAACAACCTTTAAACTCTTTTAACAATTCAATTAAATCATACCTATCAGTTTCAGAAAACATGGCACTGATGAAGGTAGGACAGTA
TTTGCCATTCTTCTTCCTAAATGGCACTATATTAGACAACCATTCCACATACCTAGCATGTCTAATAAACTTAGCTTTTAACAAGCGTTCAATTTTTATTXXXXXXXXXXGATAATCCCATGTAAAACAACCTTTAAACTCTTTTAACAATTCAATTAAATCATACCTATCAGTTTCAGAAAACATGGCACTGATGAAGGTAGGACAGTA
>Marker215238
TTGTGAAGGAAATTAAGTGAAAGACTCATACGATTTAAGGGGAAAAGATGGAACGAGTTCAAATTTGAAATGCGGAAATAAGCAACTTTAGATAAACACCXXXXXXXXXXCGAAGACTAGTCAGTTACGTGCTTGGCGGTATATCACCCATGGGCATGACGAGTAGATGATCACGCTCTTGGTATGAAGTTAGTCACATGCATGGTGGAA
TTGTGAAGGAAATTAAGTGAAAGACTCATACGATTTAAGGGGAAAAGATGGAACGAGTTCAAATTTGAAATGCGGAAATAAGCAACTTTAGATAAAAACCXXXXXXXXXXCGAAGACTAGTCAGTTACGTGCTTGGCGGTATATCACCCATGGGCATGACGAGTAGATGATCACGCTCTTGGTATGAAGTTAGTCACATGCATGGTGGAA
>Marker215313
ACAAGCGTGATAGATAGGCAACATAAGGCGTTTCTAGAAAGAAGAACCAAAAGTAAACGTGACGGAAATTTAGTGAAAGACTCAAACGATTTAAGGGGAAXXXXXXXXXXTCGAAGACCAGTGAGTTACGTGCTTGGCGGTATGTCACCCCGGGCTTGACGAGTAGATGATCACGCTCTTGGTATGAAGTTAGTCATGGGCATGGTGGAA
ACAAGCGTGATAGATAGGCAACATAAGGCGTTTCTAGAAAGAAGAACCAAAAGTAAACGTGACGGAAATTTAGTGAAAGACTCATACAATTTAAGGGGAAXXXXXXXXXXTCGAAGACCAGTGAGTTACGTGCTTGGCGGTATGTCACCCCGGGCTTGACGAGTAGATGATCACGCTCTTGGTATGAAGTTAGTCATGGGCATGGTGGAA
>Marker216459
TGAGAATTATATTTATCTTAGTTGACTAACTTCTTGTAACTCTTGTCTTTATTCTACACTTTCCATTTGGCACTTATATGCTCCCAGCCCTTTGGAAGAGXXXXXXXXXXCGGGAATTTATGTTTTACCGCAATCCTAGTGCTGATATGTTACTTGAAGAAAGCGAACTTGATCTTGATTTGATTCGGAAGGTAATGCATAGATCACTTT
TGAGAATTATATTTATCTTAGTTGACTAACTTCTTGTAACTCTGTCTTTATTCTACACTTTCCATTTGGCACTTATATGCTCCCAGCTCTTTGGAAGAGAXXXXXXXXXXCGGGAATTTATGTTTTACCGCAATCCTAGTGCTGATATGTTACTTGAAGAAAGCGAACTTGATCTTGATTTGATTCGGAAGGTAATGCATAGATCACTTT
>Marker216502
ATTTCTTAGCTTTTCAGAAAGCAAACGACCCATGGTATAGTCCTTCACTTTGATAAGAGTGACCTTTGGTATAGACCAATTTCTTGTTTCTTATTTTCTAXXXXXXXXXXGTTTCTTATTTTCTAATGAGGAAGAGTTCACATTCGGTGGCAAACCTCAGCCATATGAATGCTAGGAAAACACTTGAAAAACGAGCATTCCACTAGTGTA
ATTTCTTAGCTTTTCAGAAAGCAAACGACCCATGGTATAGTCCTTCACTTTGATAAGAGTGACCTTTGGTATCGACCAATTTCTTGTTTCTTATTTTCTAXXXXXXXXXXGTTTCTTATTTTCTAATGAGGAAGAGTTCACATTCGGTGGCAAACCTCAGCCATATGAATGCTAGGAAAACACTTGAAAAACGAGCATTCCACTAGTGTA
>Marker216506
TTGGGGAGAGATGGCTTTATCATATCTTATGAGACGTTAACCTAAAAAATGCCGACCCAGGGATTTGAGATTCTGGGTGTCTCTGTCTCTGTTGCCTGTTXXXXXXXXXXAGTTTAACAACCCAAAGCCGCCCAAAGACATATCCAAGTCGCCAATAGAACAATCCAGTCTACGAAACTTGGGAATTTCGATCTTAACCATAGGAATGAA
TTGGGGAGAGATGGCTTTATCATATCTTATGAGACGTTAACCTAAAAAAATGCCGACCCAGGGATTTGAGATTCTGGGTGTCTCTGTCTCTGTTGCCTGTXXXXXXXXXXAGTTTAACAACCCAAAGCCGCCCAAAGACAAATCCAAGTCGCCAATAGAACAATCCAGTCTACGAAACTTGGGAATTTCGATCTTAACCATAGAAATGAA
>Marker216535
AAGTCTTCGAAAAGGGAGATCGATTTCGAACATCTGGCGAGTTTGCAGGAGGCAGCTCGCCAATGTGAGTGATCCCCCAAGTTTTTTGGATGGAGTTCCAXXXXXXXXXXAAGTTTTATAAATTTTTTCTTCTTTCTTATTACCCAAAAATGGACGAAACTTTCAAACACCAAATTTTTATCATTCTTATTATATATTTAGTAAGAATTT
AAGTCTTCGAAAAGGGAGACCGATTTCGAACATCTAGCGAGTTTGCAGGAGGCAACTCGCCAATGTGAGTAATCCCCCAAATATTTTGGATGGAGTTCCAXXXXXXXXXXAAGTTTTATAAATCTTTTCTTCTTTCTTATTACCCAAAAATGGACGAAACTTTCAAACACCAAATTTTTATCATTCTTATTATATATTTAGTAAGAATTT
>Marker216590
TAAATGGAGGCGGTTCACGCGGTTTCGACGCGTGAATCGTGGGAGAGGGATTGATCCGGTGGGGTGCGAGCGCATGGTGTAATTAATGTGGATGAGTGGCXXXXXXXXXXAAAGCGACTGTTTTATTATTATTATTTGTTTTTAATTTTCTTGGAATCAGATTGGTTCTTCAGTGTTGACGTGTGGAGGAGGTTAAAGATTAAGGGATTT
TAAATGGAGGCGGTTCACGCGGTTTCGACGCGTGAATCGTGGGAGAGGGATTGATCCGGTGGGGTGCGAGCGCATGGGGTAATTAATGTGGATGAGTGGCXXXXXXXXXXAAAGCGACTGTTTTATTATTATTATTTGTTTTTAATTTTCTTGGAATCAGATTGGTTCTTCAGTGTTGACGTGTGGAGGAGGTTAAAGATTAAGGGATTT
>Marker217488
CACCTTCATAACATAATTAATTTGGATCAACCGGTTTTCGATATGAATCGAACAATAGATTATATCATTATCATTATTGAGACGGTTAGTCATTTTACATXXXXXXXXXXATTTTATACGAGTATTAAACAAATTATGTTAACTAAGATTATGGTCAATACGGACTATAGTGATGAGACTGGATCAGAGACCCAATGGGCTTTACCAGCA
CACCTTCATAACATAATTAATTTGGATCAACCGGTTTTCGATATGAATCGAACAATAGATTATATCATTGTCATTATTGAGACGGTTAGTCATTTTACATXXXXXXXXXXGTTTTATACGAGTATTAAACAAATTATGTTAACTAAGATTATGGTCAATACGAACTATAGTGATGAGACTGGATCAGAGACCCAATGGGCTTTACCAGCA
>Marker217651
ATCTCTTTCGGATTGTAAAATATTACAAGGGACCTTACATTTTCACTGTTGCAGGCATATAATTTTAATTCGTTTACTGATGTTCAGAGGAGTGCAATCAXXXXXXXXXXCCAGGGCAGGAATGAAAGTTGGTTTATACCTACTAAATTGGCTACCAATTTATCGGTTAGCTTAGCTGATTCATCAACACGAAAACAGGTGTGTGGAAGT
ATCTCTTTCGGATTGTAAAATATTACAGGGGACCTTACATTTTCACTGTTTCAGGCATATAATTTCAATTCGTTTACTGATGTTCAGAGGAGTGCAATCAXXXXXXXXXXCCAGGGCAGGAATGAAAGTTGGTTTATACCTACTAAATTGGCTACCAATTTATCGGTTAGCTTAGCTGATTCATCAACACGAAAACAGGTGTGTGGAAGT
>Marker218654
CCCCTTAAAATTTATCAATCAGCACCGCTCCAGGCAACTGTCACTCACCATTGGATGATCCTCACTCCTGAACCACCCGGAAAATGGAAGATGCAATGAAXXXXXXXXXXTATTCTAGCAGTAGGTCTAACCTGACTCACATGATAAATTCATTCTACATCCTCTTCATATGTTTATCTCGGCAGCCAATCAGACAGAAGAATCAAAGGT
CCCCTTAAAATTTATCAATCAGCACCGCTCCAGGCAACTGTCACTCACCATTGGATGATCCTCACTCCTGAACCACCCGGAAAATGGAAGATGCAATGAAXXXXXXXXXXTATTCTAGCAGTAGGTCTAACCTGACTCACATAATAAATTCATTCTACATCCTCTTCATATGTTTATCTCGGCAGCCAATCAGACAGAAGAATCAAAGGT
>Marker221665
TACTCTCGCCCAAGCACATTTAACTTTGGAGTTCTTACGAGATCCGGTGCACTAGTTCTGGTATGATCATATTCGTCTACTTCCAACAGTCATGTGTATAXXXXXXXXXXATGATTTCTCTCGAGAGGCGTGCCGACGGCTTAGGGGGTGTAAAAATTTGTGAAAAGAGGGGGTGCAACCCGAGGACTTCCGAAGAGGTCACCCATCTTC
TACTCTCGCCCAAGCACATTTAACTTTGGAGTTCTTATGAGATCCGGTGCACTAGTTCTGGTATGATCATATTCGTCTACTTCCAACAGTCATGTGTATAXXXXXXXXXXATGATTTCTCTCGAGAGGCGTGCCGACGGCTTAGGGGGTGTAAAAATTTGTGAAAAGAGGGGGTGCAACCCGAGGACTTCCGAAGAGGTCACCCATCTTC
>Marker223045
AGAAACCGTCCAAATTCCCGAAGAATTCTTCAACCAACATGGAAGGTCACATGGCGGCGACCTGCCAGCGCAAGTGATACCGGGGGACCTGGATAACTGAXXXXXXXXXXTTTACCAGATTTTTCTAACCACTAATTTAAGTATAATAAAAAATGTTAAACAATAGAGATCAATCAAATCGTAAAATCGTAGGATTTTAATATAAAAATC
AGAAACCGTCCAAATTCCCGAAGAATTCTTCAACCAACATGGAAGGTCACATGGCGGCGACCTGCCAGCGCAAGTGATACCGGGGGACCTGGATAACTGAXXXXXXXXXXTTTACCAGATTTTTCTAACCACTAATTTAAGTATAATAAAAAATTTTAAACAATAGAGATCAATCAAATCGTAAAATCGTAGGATTTTAATATAAAAATC
>Marker223096
TATATATTGACGGAGCAATCACAAGATGGATAATTTAATATGTGTCCATCAATTTGACTTCTTTAATGGACTGTTTAGCAGACAATTTATGCCGGCATCCXXXXXXXXXXATTTGTATCTACGCCTGTTACAATGTTAAGTTTATTATTTAACTTTGAGGTTTGTGTTGATCCATTGTAACTTGATGGAATAATGACTCTGCAGAAAACT
TATATATTGACGGAGCAATCACAAGATGGATAATTTAATATGTGTCCATCAATTTAACTTCTTTAATCGACTATTTAGCAGACAATTTATGCCGGCATCCXXXXXXXXXXATTTGTATCTACGCCTGTTACAATGTTAAGTTTATTATTTAACTTTGAGGTTTGTGTTGATCCATTGTAACTTGATGGAATAATAACTCTGCAGAAAACT
>Marker225746
TTGATATTCACCAAGCCGTTGACAGAGCAACATGGGACTGGACTACTACTGATTGCCATGGGGATTACTCTTAAGCTGTTGCCTGACCAGCAGATTCCCAXXXXXXXXXXTACAAGAAGATTTCTTCGTCGTCTTCGGTAGCTTCGTCTCGAACCCATGACAAGATTGAGATGGAAGATGTTGAAGAAAGAGGTGGGAGTAAAGAGAAGA
TTGATATTCACCAAGCCGTTGACAGAGCAACATGGGACTGGACTACTACTGATTGCCATGGGGATTACTCTTAAGCTGTTGCCTGACCAGCAGATTCCCAXXXXXXXXXXTACAAGAAGATTTCTTCGTCGTCTTCGGTAGCTTCGTCTCGAACCCACGACAAGATTGAGATGGAAGATGTTGAAGAAAGAGGTGGGAGTAAAGAGAAGA
>Marker225756
ACGATATCAAGCGACCGATGATTACTTACGGTCATCATCTTGAGGTTCAGGATTCGAAATCCTCTACGATATACAACGAAAGCTGGAAAAAGCTTCTCGAXXXXXXXXXXTTTTGGCAGAGAAGGACAAGCTAATGTCGAAGAGCGAATCGTTGATGACGAAATCCCTCGAAGAGAAGGACCAACTATTGGCAGAGAAGGACCAGCTTTT
ACGATATCAAGCGACCGATGATTACTTACGGTCATCATCTTGAGGTTCAGGATTCGAAATCCTCTACGATATACAACGAAAGCTGGAAAAAGCTTCTCGAXXXXXXXXXXTTTTGGCAGAGAAGGACAGGCTAATGTCGAAGAGCGAATCGTTGATGACGAAATCCCTCGAAGAGAAGGACCAACTGTTGGCAGAGAAGGACCAGCTTTT
>Marker225838
TAAATTTCACCTCATCCTCACATAACAAACTTGATTGCTAGCTCTCCACTCCTCGAAACCATAGAACTTTGGCTGGTAGAGAATCTTAAGAAGATACGAGXXXXXXXXXXATTTCGGAGCTCCAGCTTCTGAAATTTTTAGGCATACCTGGACCTCAGTCTGAGAAGAAGCTGAAATCTTCGAGTCCCAAGCTCGAGAAGTTCGAGCTAT
TAAATTTCACCTCATCCTCATATAACAAACTTGATTGCTAGCTCTCCACTCCTCGGAACCATAGAACTTTGGCTGGTAGAGAATCTTAAGAAGATACTAGXXXXXXXXXXATTTCGGAGCTCCAGCTTCTGAAATTTTTAGGCATACCTGGACCTCAGTCGGAGAAGAAGCTGAAATCTTCGAGTCCCAAGCTGGAGAAGTTCGAGCTAT
>Marker226837
TATAATGAAACATGATTTTATAGCCATCTTAGACATGCATGTCAAATATTAGTCGATTTTAAAATTTTAAAATTTTTATGTCAAAGTGTCTCATTTCCATXXXXXXXXXXTCAAAAAATAGTCAAATGATGTTAAAAAAATATTTTTTTCAACACTAACATAATACCGAGTAAAATAAATTTTAACTTCATTTGACTGTTATTTATAGAG
TATAATGAAACATGATTTTATAGCCATCTTAGACATGCATGTCAAATATTAGTCGATTTTAAAATTTTAAAATTTTGATGTCAAAGTGTCTCATTTCCATXXXXXXXXXXTCAAAAAATAGTCAAATGATGTTAAAAAAATATTTTTTTCAACACTAACATAATACCGAGTAAAATAAATTTTAACTTCATTTGACTGTTATTTATAGAG
>Marker227854
TATTCTACCACTAGACCACTGGTGCCTGTTGTTCAGTTGGTGGCTTGTATTTTAAAACAACGTTTTCTCACAAATGACGTGGTATATTTGGTGATGATGTXXXXXXXXXXCACTCACTATACTTGATCACAGAGGGCTTTTCTATATCAGGCAGTTTACGACTCGTAAGCTGTAACCACCCAAACATATCTACTCAACCGCCAACAATTA
TATTCTACCACTAGACCACTGGTGCCTGTTGTTCAGTTGGTGGCTTGTATTTTATAACAACCTTATCTCACAAATGACGTGGTATATTTCGTGATGATGTXXXXXXXXXXCACTAACTATACTTGATCACAGAGGGCTTTTCTATATCAGGCAGTTTACGACTCGTAAGCTGTAACCACCCAAACGTATCTACTCAACCGCCAACAATTA
>Marker227857
TCTTCATAAAAACAGAAATAAAATCAACTGTAAATGTGCAGCAAGGTTATCTGATTATATCTCAGTAATGTCTGTGAGTTGATGTCTATTGTCTCGTGAAXXXXXXXXXXCAATTTTCATCCAATTATTCAGATAACTTGCGAAGGACAACCTCACAGTTGGCAGATTTCATCACTGCTAATGCACCAGCCGGGAATCGAACCCGGGTCT
TCTTCATAAAAACAGAAATAAAATCAACTGTAAATGTGCAGCAAGGTTATATGATTATATCTCAGTAATGTCTGTGAGTTGATGTCTATTGTCTCGTGAAXXXXXXXXXXCAATTTTCATCCAATTATTCAGATAATTTGCGAAGGACAACCTCACAGTTGGCAGATTTCATCACTGCTAATGCACCAGCCGGGAATCGAACCCGGGTCT
>Marker228479
TCATCACCTGCTGGAGGCATATTCTCATTTGGGTCCAGTCTACAAAATGGAACTCTTCCAGGGTCAGCAACTGCTCAAACTGTATCCAACAGTTCCGTCTXXXXXXXXXXGGTAGTGTTATCAGCCGAAAAAAAGCAGACACTAGCTTTGGAAGTTTTATCAGTGCTGCCTCCGGTGATTCCAAACCTGCAGTCACAATTGCTGAGAACA
TCATCACCTGCTGGAGGCATATTCTCATTTGGGTCCAGTCTACAAAATGGAACTCTTCCAGGGTCAGCAACTGCTCAAACTGTATCCAACAGTTCCGTCTXXXXXXXXXXGGTAGTGTTATCAGCCAAAAAAAAGCAGACACTAGCTTTGGAAGTTTTATCAGTGCTGCCTCCGGTGATTCCAAACCTGCAGTCACAATTGCTGAGAACA
>Marker229338
TCTCATAAAAATGTTAGCGAATTCAGTCTCAATGAACTCTAGCTCCACTTTGTTGGTTCCCCATGTCTCATCCGCTCATTGTAGTCTTTTGGCAGTGTTCXXXXXXXXXXAACATTAGTTTTCAATGGTCATTTACTAATTTTGTTATAACTGATAGCTTTTTATTATAATTTTGTTTTTATAACTGATAGCTTTAAATTATAAACTGTT
TCTCATAAAAATGTTAGCGAATTCAGTCTCAATGAACTCTAGCTCCACTTTGTTGGTTCCCCATGTCTCATCCGCTCATTGTAGTCTTTTGGCAGTGTTCXXXXXXXXXXAACATTAGTTTTCAATGGTCATTTACTAATTTTGTTATAACTGATAGCTTTTTATTATAATTTTGTTTTTATAACTGATAGCTTTAAATTATAAACTATT
>Marker229426
GCAATTGGAGAGTCTTTGTTACTCATACTTATCATGAAGGAAATGATTTTGCTGATCTCATCACTCATCTTGGTCATTCCCTCCCTTTCGGAATGCATCGXXXXXXXXXXACCAAACTAGCCTACCTAATCTGGTTCTTTCACAAAATGACAAACTCTCGACCAGTCTGACATCTGCTGGAAAAGAAAATATTGGCTGCATTTAACTAAC
GCAATTGGAGAGTCTTTGTTACTAATACTTATCATGAAGGAAATGATTTTGCTGATCTCATCACTCATCTTGGTCATTCCCTCCCTTTCGGAATGCATCGXXXXXXXXXXACCAAACTAGCCTACCTAATCTGGTTCTTTCACAAAATGACAAACTCTCGACCAGTCTGACATCTGCTGGAAAAGAAAATATTGGCTGCATTTAACTAAC
>Marker230238
ATTGCGCACAATTTTGACTTTAAGAGATTCAAATCACTTAAATTCATAAAGTGTAAAAATAAAATCATATACAGTCCATAAATTAAAAAATATATGTTTAXXXXXXXXXXACTTGTTAAATCGATAATTAAAGTAACTCGTTTGAAACTAGTGCCATATTATCACTCCAATGTTTGTTTTTATAGAGAAATCTCCAAAGAGTAAAAGTTA
ATTGCGCACAATTTTGACTTTAAGAGATTCAAATCACTTAAATTCATAAATTGTAAAAATAAAATCATATACAGTCCATAAATTAAAAAATATATGTTTAXXXXXXXXXXATTTGTTAAATCGATAATTAAAGTAACTCGTTTGAAACTAGTGCCATATTATCACTCCAATGTTTGTTTTTATAGAGAAATCTCCAAAGAGTAAAAGTTA
>Marker231009
AGTTCCACAAGCACGTCTCATGTTATCTTATGTTTCCCAAGACTGGAAACCATGTGACTAGAATGACCATAATCGTCTGATACCTTCTATAGGGAAAAGTXXXXXXXXXXACAACCATGTGGCTGACGTCTACATATTCAACTTCGATTTTCCCTATTGACGTATTCAATTGGAAATTGTATCCTCCTCCACCCCATTATTGTGTTCTTT
AGTTCCACAAGCACGTCTCATGTTATCTTATGTTTCCCAAGACTGGAAACCATGTGACTAGAATGACCATAATTGTCTGATACCTTCTATAGGGAAAAGTXXXXXXXXXXACAACCATGTGGCTGACGTCTACATATTCAACTTCGATTTTCCCTATTGACGTATTCAATTGGAAATTGTATCCTCCTCCACCCCATTATTGTGTTCTTT
>Marker231053
ACAATAAATGCTGTCACGTGAACTAGTATTCAATAAAAAAACCTATTCAATAAATAAAAGGAAATAGCAGAATAAAGACTTACCGGCGACGTTGATGTTCXXXXXXXXXXATGATGAGCTTACTTCCTATCTGCAATGAAGTAATCCTTGAAGAGCTGCAGTCTCCTATCCTTGACATCCTTGCACACCTTCAAATAGCCTCTCAAAAAC
ACAATAAATGCTGTCACGTGAACTAGTATTCAATAAAAAAAACCTATTCAATAAATAAAAGGAAATAGCAGAATAAAGACTTACCGGCGACGTTGATGTTXXXXXXXXXXATGATGAGCTTACTTCCTATCTGCAATGAAGTAATCCTTGAAGAGCTGCAGTCTCCTATCCTTGACATCCTTGCACACCTTCAAATAGCCTCTCAAAAAC
>Marker233311
ACGATTTCCTTGCCTCCGAAGGATCTATTATTCGAGAGATCATCACGCTACTTTCCGTCTCCTCTTAATTTCACATGCAGATTGATAATCGATCAACTAAXXXXXXXXXXAGAAGAGTTGTCGATATTCATTCTCTAAAATAAAAAAAATTAAGTTTTGCCGTATTTTATCTACTCGTCTCCTCAGAAAGCTATTGAGTCAAGAAAAAGT
ACGATTTCCTTGCCTCCGAAGGATCTATTATTCGAGAGATCATCACGCTACTTTCCGTCTCCTCTTAATTTCACATGCAGATTGATAATCGATCAACTAAXXXXXXXXXXAGAAGAGTTGTCGGTATTCATTCTCTAAAATAAAAAAAATTAAGTTTTGCCGTATTTTATCTACTCGTCTCCTCAGAAAGCTATTGAGTCAAGAAAAAGT
>Marker236050
GTATTTGGCGTGGAGGGAACGGAGGAGTGGTTCAAGTCCGGACCGGACCAGAAGGATCTGGTTTCCGATGAACGATAACCCAGCGGGGAGAGGGGGAAGGXXXXXXXXXXCTGGAGTTCACTGGTTTGAGTGGAGCAAAGTGGTGTAGTTTTTATATTTGGTGAGAGCGAGAGTGAATCATGTGATATGGATGATACCCTGAAATTAAAT
GTATTTGGCGTGGAGGGAACGGAGGAGTGGTTCAAGTCCGGACCGGACCAGAAGGATCTGGTTTCCGATGAACGATAACCCAGCGAGGAGAGGGGGAAGGXXXXXXXXXXCTGGAGTTCACTGGTTTGAGTGGAGCAAAGTGGTGTAGTTTTTATATTTGGTGAGAGCGAGAGTGAATCATGTGATATGGATGATACCCTGAAATTAAAT
>Marker236095
AAAATTTTATATCTACCCAAACTTTCAGGTTTTGACAAATATATCCTTGATCATTGGAAAATCATTAAATCAAAATATGTCTTTGTTAACTTTTTCGTCCXXXXXXXXXXACTATATTGCACTTCCTGACAAATCAATTTCTTGGTTGGCGACCGCCTTCCACTCGAAACTCCAAACCCAATTAACAACGAAATACTCCAAATAAAGTAA
AAAATTTTATATCTACCCAAACTTTCAGGTTTTGACAAATATATCCTTGATCATTGGAAAATCATTAAATCAAAATATGTCTTTGTTAACTTTTTCGTCCXXXXXXXXXXACTATATTGCACTTCCTGACAAATCAATTTCTTGGTTGGCGACCGCCTTCCACTCGAAACTCCAAACCCAATTAACAACGAAATACTCCAAATGAAGTAA
>Marker236202
AGAAAAGTTTTCATTCAGACCCCTTAAGAAATGAATGACATTGTTGGTGTCTTCATACACATACACCTTTCTCATCGCCAGGCAGTCAAGATGACTGGTTXXXXXXXXXXTGCATCCTGTGCATTCTTCAGTCCCATAATCGTCTTTCTGATGCCTGGTTCGACTGATTGTTGTAACCAGCTAAGAACCATGATGTTGCAACGAGTCCAG
AGAAAAGTTTTCATTCAGACCCCTTAAGAAATTAATGACATTGTTGGTGTCTTCATACACATACACCTTTCTCATCGCCAGGCAGTCAAGGTGACTGGTTXXXXXXXXXXTGCATCCTGTGCATTCTTCAGTCCCATAATCGTCTTTCTGATGCCTGGTTCGACTGATTGTTGTAACCAGCTAAGAACCATGATGTTGCAACGAGTCCAG
>Marker239447
AGATACAGTGGCTCAACTTGGCTGATAGGAATACTAGATTCTTTCACATTTCCACGATCCAGCGGAGAAGGCGTAATATGATCACTTGCTTAAAGGATCAXXXXXXXXXXATGATGGTCACTTCTGAAATGAATTCTGTTTTAACTGCACCAGCAACTGTTGCAGAGGTGAAACGAGCAGTTTTCCAACTAGGTGCAATGAAGGCATCAG
AGATACAGTGGCTCAACTTGGGAGATAGGAATACTAGATTCTTTCACATTTCCACGATCCAGCGGAGACGGCGTAATATGATCACTTGCTTAAAGGATCAXXXXXXXXXXATGATGGTCACTTCTGAAATGAATTCTGTTTTAACTGCACCAGCAACTGTTGCAGAGGTGAAACGAGCAGTTTTCCAACTAGGTGCAATGAAGGCATCAA
>Marker239456
TGACTCTTACCCAACAGAAGTATGTTACAGGGGCTTTCACAAGCATCGAAACAAGCATCAACAAACTACGGCTCAGGTGGCATGCCTAATGCCACCCTTTXXXXXXXXXXAAATACAGATGCGATGGAAATAATTCGAAGGAGGATGAAGATGACGAATTGCTTCTACGTTGAACCGATAAGGCTATCCGGGGAGTTAGCTCTATGGTGG
TGACTCTTACCCAACAGAAGTATGTTACAGGGGCTTTCACAAGCATCGAAACAAGCATCAACAAACTACGGCTCAGGTGGCATGCCTAATGCCACCCTTTXXXXXXXXXXAAATACAGATGCGATGGAAATAATTCGAAGGAGGATGAAGATGACGAATTGCTTCTACGTTGAACCGATAAGGCTATCCGGGGAGTTAGCTCTACGGTGG
>Marker239735
TGCTGTTGTTAGCGTGTTAGAGCTTAGATAAACTTTTCATTGCCTGGGAGTTGAGCCAACACATAGCCATTGATCTCCGTCACGACATCATTTGTTGGAGXXXXXXXXXXACTGTACGGCCAGAATATTTCCATCACCTACTGCTAAAAGCCACTCTGCAAACTGCATATTTGCTTTGGAAATGTTCAGTTGTATTGGTGGTTGAATCAC
TGCTGTTGTTAGCGTGTTAGAGCTTAGATAAAATTTTCATTGCCTGGGAGTTGAGCCAACACATAGCCATTGATCTCCGTCACGACATCATTTGTTGGAAXXXXXXXXXXACTGTACGGCCAGAATATTTCCATCACCTACTGCTAAAAGCCACTCTTCAAACTGCATATTTGCTTTGGAAATGTTCAGTTGTATTGGTGGTTGAATCAC
>Marker239769
CAAATCTACAATATCATCATCATATTCCATCAATGGATTTTCTGCTTCATCAAAGTCTGGGCATGAAAAGGAAGAATATGGTATGTTAGACAACATATTAXXXXXXXXXXTTGGATTATCGAGGTTGCAGGTGCTTTCCTTCGCTTGCTTGTTGACGACACATCTTCGATTGTGTGTTTACTTGGACGTAGCCTGCTAATAGAACAAAAG
CAAATCTACAATATCATCATCATATTCCATCAATGGATTTTCTGCTTCATCAAAGTCTGGGCATGAAAAGGAAGAATATGGTATGTTAGACAACAGATTAXXXXXXXXXXTTGGATTATCGAGGTTGCAGGTGCTTTCCTTCGCTTGCTTGTTGACGACACATCTTCGATTGTGTGTTTACTTGGGCGTAGCCTGCTAATAGAACAAAAG
>Marker239981
TGCTGTTGTTAGCGTGTTAGAGCTTAGATAAACTTTTCATTGCCTGGGAGTTGAGCCAACACATAGCCATTGATCTCCGTCACGACATCATTTGTTGGAGXXXXXXXXXXGTTCCATGAAGTCTTTAATTGGGGTTGCTACTGACTCAAGAACCAAGAATTGTTCTGAAATTTGTATTCGATCATAGAGTGTGGCAGTCGTTGACTGTAC
TGCTGTTGTTAGCGTGTTAGAGCTTAGATAAAATTTTCATTGCCTGGGAGTTGAGCCAACACATAGCCATTGATCTCCGTCACGACATCATTTGTTGGAAXXXXXXXXXXGTTCCATGAAGTCTTTAATTGGGGTTGCTACTGACTCAAGAACCAAGAATTGTTCTGAAATTTGTATTCGATCATAGAGTGTGGCAGTTGTTGACTGTAC
>Marker240410
CTGTGAAAACAATGGGATAATTGTTACACCGGCATGCCCTCCTGCAACTGGAATGTTGACCCCTGCACAATTCAGTTACAAACCAACTTAACTAAAAAATXXXXXXXXXXTAGAATTGGATAAACCATCCTTGGAGGAAAATCTAGGAGACAGATACAAGATGTATCGACTGAGAAACAAGCTAAAAAACGGACCTGCGACAGGGACATT
CTGTGAAAACAATGGGATAATTGTTACACCGGCATGCCCTCCTACAACTGGAATGTTGACCCCTGCACAATTCAGTTACAAACCAACTTAACTAAAAAATXXXXXXXXXXTAGAATTGGATAAACCATCCTTGGAGGAAAATCTAGGAGACAGATACAAGATGTATCGACTGAGAAACAAGCTAAAAAACGGACCTGCGACAGGGACATT
>Marker241872
GCCTCTGCTCAAAATCGGTGACCAGCATATATATGAACTATGCCTACCAAAAGAAATAGACAAGATGAAGAAACAATGCAGAATGGAGTTGGAGTCTGCTXXXXXXXXXXACTTAGACAAAGGTTACGTCAGACGTAGACCACAAGTTACCCCAAGTTCCAAAGGCATGCAAGCGAAAATAGCAAGCCTTTATTGTTCTAGCCTCTAACT
GCCTCTGCTCAAAATCGGTGACCAGCATATATATGAACTATGCCTACCAAAAGAAATAGACAAGATGAAGAAACAATGCAGAATGGAGTTGGAGTCTGCTXXXXXXXXXXACTTAGACAAAGGTTACGTCAGACGTAGACCACAAATTACCCCAAGTTCCAAAGGCATGCAAGCGAAAATAGCAAGCCTTTATTGTTCTAGCCTCTAACT
>Marker242541
CTTTATTGTTTTTTGGGACACATACTGCAAATTGAACTCAAATAGATCAAGTGTCCACATATCAATCCTCACATGGATTATTGGTCGGAACAATATGTATXXXXXXXXXXGTAAATGAGATATATAAAGTTAAACACGACTTCTCTATGGGAGAATATCTCAGTGCAGCCCTATTTAGTAATCTACTTACGTAATAGAAAACATGTTCAA
CTTTATTATTTTTTGGGACACATACTACAAATTGAACTCAGATAGACCAAGTGTCCACTTACCAATCCTCACATGGATTATTGGTCGGAACAATATGTATXXXXXXXXXXGTAAATGAGATATATAAAGCTAAACACGACTTCTCTATGGGGGAATATCTCAGCGCAGCCCTATTTAGTAATCTACTTAAGTAATATAAAACATGTTCAA
>Marker242692
ACTAGTTGGGAGTCCCCTCTAATATTAACACTCCTAGCTTCAAATCAATAAGTATCTGCATCCCAACCATTAATTCCTCGTATTTGGCTTGGTTAGTGGTXXXXXXXXXXAAGTAAAAAGTCGATGGGACATCGCCAACAATACCTATCTCCACTTACTTAGGAAACACATCCCCACAAGGGTGGTCTACCAAGAAGTAAACAAAAGGTT
ACTAGTTGGGAGTCCCCTTTAATATTAACACTCCTAGCTTTCAAATCAATAAGTATTTGCATCCCAACCATTAATTCCTCGTATTTGGCTTGGTTAGTGGXXXXXXXXXXAAGTAAAAAGTCGATGGGACATCACCAACCATACCTATCTCCACTTACTTAGGAAACACATCCACACAAGGGTGGTCTACCAAGAAGTAAACAAAAGGTT
>Marker243848
CTGAATTCAACGGATTTCAGGCTCCTCACTCTCAGCCATATCTCTCATCGGTAATTGCAGACACCAGAACGTGAATCACACTTCCAGATGCATTGCAGATXXXXXXXXXXCTGTGTGGAATGTTTAAACTCTTGAAGCTACATACTACATGCCAATGTTTAATAAATAATAGGCATAGTGCGTTGTTTATAGAATGTTCGAGCAACGTCA
CTGAATTCAACGGATTTCAGGCTCCTCACTCGCAGCCATATCTCTCATCGGTAATTGCAGACACCAGAACGTGAATCACACTTCCAGATGCATTGCAGATXXXXXXXXXXCTGTGTGGAATGTTTAAACTCTTGAAGCTACATACTACATGCCAATGTTTAATAAATAATAGGCATAGTGCGTTGTTTATAGAATGTTCGAGCAACGTCA
>Marker244437
CTCTGTCTTTGACAACCAACAATGCAGTTGCCGGTGCAAGTTCGACTAACTTTTTGATGGCATCAGATGTTTTTCCCTTTGCAAGACACTCCAAATACTTXXXXXXXXXXATTTTTAAGTGCTCTTGCAGCTCCAATATAGAAGCGCTTCCCAATCACAAACTGCACCACACTCACCAATGCCCACTTCAACCAATCACCCATGAGGAAA
CTCTGTCTTTGACAACCAACAATGCAGTTGCCGGTGCAAGTTCGACTAACTTTTTGATGGCATCAGATGTTTTTCCCTTTGCAAGACACTCCAAATACTTXXXXXXXXXXATTTTTAAGTGCTCTTGCAGCTCCAACATAGAAGCGCTTCCCAATCACAAACTGCACCACACTCACCAATGCCCACTTCAACCAATCACCCATGAGGAAA
>Marker245486
GTTGTTTTTGTGTTTTTGTTATGGTTGGCAGGTCTCAATAACGGTTCTTCTATCACATCTCACCACCAAAATCCATTTCACCAACTCAATTCGGTATCACXXXXXXXXXXGAAATTCCCTCTTAGACTTGAAACTTTGGATGATGTGGATGCATGTTTAGCGTAGTATTGCTACTTGAGGGTGAATAGGATGCATGATAGATCATTTTTG
ATTGTTTTTGTGTTTTTGTTATGGTTGGCAGGTCTCAATAACGGTTCTTCTATCACATCTCACCACCAAAATCCATTTCACCAACTCAATTCGATATCACXXXXXXXXXXGAAATTCCCTCTTAGACTTGAAACTTTGGATGATGTGGATGCATGTTTAGCGTAGTATTGCTACTTGAGGGTGAATAGGATGCATGATAGATCATTTTTG
>Marker246241
TTACCGTAGGAGTTGAGGAAATCATAAGGGAAGGAGAAGGTTCATCGGTGGTAAGGCAGGAGGAGGAGAGGGAGAGTGGGTAGTGACGGGTGATGCGTATXXXXXXXXXXCAGGCGTGACTTCGCAACCGTCATGGGTGTGGTTTTTGAATTTCCCATGTGCGTGACCGATAGTCTGCCACGGATGTGGTCGCCAAGGCAGATCAGGTTT
TTACCGTAGGAGTTGAGGAAATCATAAGGGAAGGAGAAGGTTCGTCGGTGGTAAGGCAGGAGGAGGAGAGGGAGAGTGGGTAGTGACGGGTGATGCGTATXXXXXXXXXXCAGGCGTGACTTCGCAACCGTCATGGGTGTGGTTTTTGAATTTCCCATGTGCGTGACCGATAGTCTGCCACGGATGTGGTCGCCAAGGCAGATCAGGTTT
>Marker247226
CGACTTAAATTGATAGAGATGCAACACTTTATTACCATGAAACCGGTTGACCCAATCTTGATTCACAAAAAAGCGATCAAGGCACTCCTCAATGAAATCTXXXXXXXXXXCACTCACTAAACTCATTAATACTATATTCCAAAGTATGTCTACCACCCGCTTTCTCCACCACCGAGCTGATTTGATTAAAATCACCACCACATACCCAAG
CGACTTAAATTGATAGAAATGCAACACTTTATTACCATGAAACCGGTTGACCCAATCTTGATTCACAAAAAAGCGATCAAGGCACTCCTCAATGAAATCTXXXXXXXXXXCACTCACTAAACTCATTAATACTATATTCCAAAGTATGTCTACCACCCGCTTTCTCCACCACCGAGCTGATTTGATTAAAATCACCACCACATACCCAAG
>Marker247246
TTGTGACCTACTACCGGTCAAGCCCGTGATGGTCCAATTATCAAACCAAAACTCAGTCAGTTAATCCTTCACTCGCAACACAACTGTTGACCTAAAATGGXXXXXXXXXXGTCTTGCCGTCCGTCCTTTTTAACAACTGAACCGGTCAATTTCACGATTATGACCTACCAGTCATTCCACCACCTCGTCTCGGGGGAACAACAACGGTCT
TTGTGACCTACTACCGGTCACGCCCGTGATGGTCCAATTATCAAACCAAAATTCAGTCAGTTAATCCTTAACTCGCAACACAACTGTTGACCTAAAATGGXXXXXXXXXXGTCTTGCCATCCGTCCTTTTTAAGAACTGAACCGGTCAATTTCACAATTATGACCTACCAGTCATTCCACCACCTCGTCTCGGGGGAACAACAACGGTCT
>Marker253913
TCAGCAATTGGTAAAGCAAATATTCAACCATAACCAAAACATCAATTTAAATGCAACAAGCAGGATACTTTCACCAGAAGTTGTTGGAGAAATTCGATGCXXXXXXXXXXATTGATACCGTTCCCGCGACTGAAGCTGTTGTTGGTTGACTCTTTCCTCCATTGCTCGCAAGCTGTTCGACAAAAGTTCCCATTGTTGGATCTCCTTCTG
TCAGCAATTGGTAAAGCAAATATTCAACCATAACCAAAACATCAATTTAAATGCAACAAGCAGGATACTTTCACCAGAAGTTGTTGGAGAAATTCGATGCXXXXXXXXXXATTGATACCGTTCCCGTGACTGAAGCTGTTGTTGGTTGACTCTTTCCTCCATTGCTCGCAAGCTGTTCGACAAAAGTTCCCATTGTTGGATCTCCTTCTG
>Marker254562
ACATAAAATTGCAATTGCCTAACCTGCATAGCCAATCAATCGGCGACAACATCAAGGTGGGTGTGCAACTTGTCTATCATATAGGCAGCCTTGATTATAGXXXXXXXXXXTGCCAATTGTATCCCACCATTTGCATTCGCACTCCACTTCACCGGCTACGGCATGAGCTCGGACAACTCTATCATCGAGTCGTTGGTTTCCCTCCATCTT
ACATAAAATTGCAATTGCCTAACTTGCATAGCCAATCAATCGGCGACAACATCAAGGTGGGTGTGCAACTTGTCTATCATATAGGCAGCCTTGATTATAGXXXXXXXXXXTGCCAATTGTATCCCACCATTTGCATTCGCACTCCACTTCACCGGCTACGGCATGAGCTCGGACAACTCTATCATCGAGTCGTTGGTTTCCCTCCATCTT
>Marker258053
ATACTTCCTCCATCGATACCCATCATCGAGTATATCCACTTGGCTCCTCGTCTGGAAAGCATACTTAGGCTTCTTCACCTTCTTCTTCTTCTTATTCTCAXXXXXXXXXXCGTATAGTTCATCTCCATTTGTTTTGAGTTAGTGTTGAGGGGCGGTTTAAATTTGGACTTGGTTGAGTAGATATAATGGAGAGACAGAGGCGGCAGCGAT
ATACTTCCTCCATCGATACCCATCATCGAGTATATCCACTTGGCTCCTCGTCTGGAAAGCATACTTAGGCTTCTTCACCTTCTTCTTCTTCTTATTCTCAXXXXXXXXXXCGTGTAGTTCATCTCCATTTGTTTTGAGTTAGTGTTGAGGGGCGGTTTAAATTTGGACTTGGTTGGGTAGATATAATGGAGAGACAGAGGCGGCAGCGAT
>Marker258128
TTAACTTTTGTGGACTTTGGATACTCCAAAAGGAATCCTTTGCCTTTTTGCCTTTAGCAATTTTACTGATTTAGCATCTTCTTTATATAAATGTTAAGTGXXXXXXXXXXATTGAATCTTTGTGATCCAATTATGACCAAACTTCCAACTCATTTCGATCTGAGATTTTAGAATTAGAATAAGTTTGAAAGTTAATCATGAAATTGTGAT
TTAACTTTTGTGGACTTTGGATACTCCAAAAGGAATCCTTTGCCTTTTTGCCTTTAGCAATTTTACCGATTTAGCATCTTCTTTATATAAATGTTAAGTGXXXXXXXXXXATTGAATCTTTGTGATCCAATTATGACCAAACTTCCAACTCATTTCGATCTGAGATTTTAGAATTAGAACAAGTTCGAAAGTTAATCATGAAATTGTGAT
>Marker258712
GTGTAACATCGTATTTGTTTTTGGGTTGTCTCATATCAAAAAATAAAAGGGGTTGTGTGATGTTTATAAGTATGAGGGAAAACTTCACCCATTCATTTAAXXXXXXXXXXGGTTGGTATTAACAGCGGTTGAAGATGCTATAGAAAGGTCTTTGGTTTGAGGAAGGGATTGCTGGGAAAATAACCCAAGTATAACATTGGTTTTTTGGAT
GTGTAACATCGTGTTTGTTTTTGGGTTGTCTCATATCAAAAAATAAAAGGGGTTGTGTGATGTTTATAAGTATGAGGGAAAACTTCACCCATTCATTTAAXXXXXXXXXXGGTTGGTATTAACAGCGGTTGAAGATGCTATAGAAAGGTCTTTGGTTTGAGGAAGGGATTGCTGGGAAAATAACCCAAGTATAACATTGGTTTTTTGGAT
>Marker259400
CGATTGCGACCAGTGTGATTCCCAGTTTCGGGGGTCACATAGCACATTATTTGTGAGAGGTCGGTCCGGACTTTCATAAGATCCGCGATTTCAAATTCTAXXXXXXXXXXTTTTGTTGAGAGGTGGCAGCCAGATACTAACAGGTTCCACATGCCCTTCGAAGAGATGACCATCACACTGCATGATGTTTGGCATATTCTCCGTATCCCG
CGATTGCGACCAGTGTGATTCCCAGTTTCGGGGGTCACATAGCACATTATTTGTGAGAGGTCGGTCCGGACTTTCGTAAGATCCGCGATTTCAAATTCTAXXXXXXXXXXTTTTGTTGAGAGGTGGCAGCCAGATACTAACAGGTTCCACATGCCCTTCGAAGAGATGACCATCACACTGCATGATGTTTGGCATATTCTCCGTATCCCG
>Marker259499
CGATTGCGACCAGTGTGATTCCCAGTTTCGGGGGTCACATAGCACATTATTTGTGAGAGGTCGGTCCGGACTTTCATAAGATCCGCGATTTCAAATTCTAXXXXXXXXXXTCGAAGAGATGACCATCACACTGCATGATGTTTGGCATATTCTCCGTATCCCGGTACACGGACGTCCACTTCACATTCATCGATCCAGTGAGGACTTGCA
CGATTGCGACCAGTGTGATTCCCAGTTTCGGGGGTCACATAGCACATTATTTGTGAGAGGTCGGTCCGGACTTTCGTAAGATCCGCGATTTCAAATTCTAXXXXXXXXXXTCGAAGAGATGACCATCACACTGCATGATGTTTGGCATATTCTCCGTATCCCGGTACACGGACGTCCACTTCACATTCATCGATCCAGTGAGGACTTGCA
>Marker259759
GAATTATACATAAACTACTTCGAGATAGCGGATTTTGTTGAATTTTGAGATATCAGACTTGAGGCTCATTCATTTCATTGTTACCGTTTAGAAGGATCTAXXXXXXXXXXTACTACACACTCATCAACCTGCCCCTCCTAACCTGGAAAGCCACCCAATCTGAAATTCGGAACCGTCGGAATCCACGGATCCATGCCAATCCGTGTATCT
GAATTATACATAAACTACTTCGAGATAGCGGATTTTGTTGAATTTTGAGATATCAGACTTGAGGCTCATTCATTTCTTTGTTACCGTTTAGAAGGATCTAXXXXXXXXXXTACTACACACTCATCAACCTGCCCCTCCTAACCTGGAAAGCCACCCAATCTGAAATTCGGAACCGTCGGAATCCACGGATCCATGCCAATCCGTGTATCT
>Marker268473
CATAACTTTGAGAAAGCAAAGCATACGAAGCCGTTTTTTGTCACGCTCGGATTATGGATACAGTGAGGCATTTTTTGCGGGTCTTTTTTTTCCAGAAATTXXXXXXXXXXATAAAATAGCTCTTATACACCTCAGTGTCTTTGTTCTCATTGACAAGATATCACTAAACCGCAATGATATTTTTGCGGTGTGATTTTCAATAGTTCAGCG
CATAACTTTGAGAAAGCAAAGCATACGAAGCCGTTTTTTGTCACGCTCGGATTATGGATACAGTGAGGCATTTTTTGCGGGTCTTTTTTTTCCAGAAACTXXXXXXXXXXATAAAATAGCTCTTATACACCTCAGTGTCTTTGTTCTCATTGACAAGATATCACTAAACCGCAATGATATTTTTGCGGTGTGATTTTCAATAGTTCAGCG
>Marker268501
AAAGCAGATGATGATGTAGTTTGTTTCTGGTTTGATAATATAGAATACGAGGTTCACTTTCAAATGTCTTGTCTTCTTTACTCCGACTTGCGCTTCTTTTXXXXXXXXXXCCTCGATTCAGAATTGGGTGGAGTTTTAAAGTTTAAACGAATCTACATTTGAATCAAGTTATGTTCAACTCATTAGACTTGGGAGCTGAATCAATCGATT
AAAGCAGATGATGATGTAGTTTGTTTCTGGTTTGATAATATAGAATACGAGGTTCACTTTCAAATGTCTTGTCTTCTTTACTCCGACTTGCGCTTCTTTTXXXXXXXXXXCCTCGATTCAGAATTGGGTGGAGTTTTAAAGTTTAAACGAATCTACATTTGAATCAAGTTATGTTTAACTCATTAGACTTGGGAGCTGAATCAATCGATT
>Marker270078
AATCGTTGATGTTCCCTCGCTGCAATCGGTCTCTGTAACTCTTTCTCTCTCTCTCTCTCTCTGAACTCGAAAATATGTCTAGAATGATTGATATCTTGTCXXXXXXXXXXTGCCCCGAACAGCTTAAATTGTCCGTTGTCGCTCCCGCTCATCCCCAAACACCATAGATTGCCTGAAAATGCATCAAAAACATCCCAAACAACGTAATAT
AATCGTTGATGTTCCCTCACTGCAATCGGTCTCTGTAACTCTTTCTCTCTCTCTCTCTCTGAACTCGAAAATATGTCTAGAATGATTGATATCTTGTCCAXXXXXXXXXXTGCCCCGAACAGCTTAAATTGTCCGTTGTCGCTCCCGCTCATCCCCAAACACCATAGATTGCCTGAAAATGCATCAAAAACATCCCAAACAACGTAATAT
>Marker270106
ATTTGCACGGGATTCCATGGGTTGTCTCAATTACACAATTACATGGTGTAACCTTCGGGAGCTCCTCAGTCAAAAGCTCAATCTCCCATGCTGAAACTTCXXXXXXXXXXTAGTTACATAAACAGTTTATATGTAACTAGTTACCGCCACATAATATATATAACTAGTTATCAGAATTGATGTTAATACCTTTGTGGAACAGTCATCCAA
ATTTGCACGGGATTCCATGGGTTGTCTCAATTACACAATTACATGGTGTAACCTTCGGGAGCTCCTCAGTCAAAAGCTCAATCTCCCATGCTGAAACTTCXXXXXXXXXXTAGTTACATAAACAGTTTATATATAACTAGTTACCGCCACATAATATATATAACTAGTTATCAGAATTGATGTTAATACCTTTGTGGAACAGTCATCCAA
>Marker270148
TAAGCTTGAAGAATCGCCAAGCTTTTCTGGTATCTTCCCAGTAAAATTATTATGTGACAGGTCCAACTCAGCTAAGGATGGAAGATCTGCAAACTGATCAXXXXXXXXXXAGACGTTACAACCTGAGGCAGAGAAGTTTAGGAGCACTGGCGAAGACCATATTTCCGCAGGTAAATTACCTCCAAGAACTGGGTTATCTGTAATATTGAA
TAAGCTTGAAGAATTGCCAAGCTTTTCTGATATCTTCCCAGTAAAATTATTATGTGACAGGTCCAACTCAGCTAAGGATGGAAGATCTGCAAACTGATCAXXXXXXXXXXAGACGTTACAACCTGAGGCAGAGAAGTTTAGGAGCACTGGCGAAGACCATATTTCCGCAGGTAAATTACCTCCAAGAACTGGGTTATCTGTAATATTGAA
>Marker270246
ATATGATCAAATGAAGGCTTGAAAGAAAGGAGATATGATATTATGGGGGTTTATGAAAAAGGCTTTTTGGCTATGTTTGGGTTACCTAGGGAAAAATATAXXXXXXXXXXAAGAGTCGGATTAACAACAAACAGACAAGACCACTCAAATCAATTTAAGAACAATTCTACCAATGAAGCAGATTATCTATACTACAAAATAGTCATTTTA
ATATGATCAAATGAAGGCTTGAAAGAAAGGAGATATGATATTATGGGGGTTTATGAAAAAGGCTTTTTGGCTATGTTTGGGTTACCTAGGGGAAAATATAXXXXXXXXXXAAGAGTCGGATTAACAACAAACAGACAAGACCACTCAAATCAATTTAAGAACAATTCTACCAATGAAGCAGATTATCTATACTACAAAATAGTCATTTTA
>Marker272551
TAATCTCCCAGCTACTTTACCGCCACGTCACTTAACGTCAGACTCTTCCATTAGCATCCACGTCAACTAGTTGGCTTCGGTTTCTCCCCGGCAAATCGGTXXXXXXXXXXTACCAAGTTGGCATTTGTTTCACACCCCATGATTTCTTAAAGACTCTGTTCCTAGCTTGTTCTGGTGCAATGACTGTATCGAAATGAACTTGATATCCAC
TAATCTCCCAGCTACTTTACCGCCACGTCACTTAACGTCAGACTCTTCCATTAGCATCCACGTCAACTAGTTGGCTTCGGTTTCTCCCCGGCAAATCGGTXXXXXXXXXXTACCAAGTTGGCATTTGTTTCACACCCCATGATTTCTTAAAGACTCTGTTCCTAGCTTGTTCTGGTGCAATGACTATATCGAAATGAACTTGATATCCAC
>Marker272929
CAGTTTTGTTATCATTTTCATCTATGTTCATAATACCCAAATCATCATCATTGGCATCATCATCATCATCATCATCATCATCATCATCACCACTTCCACCXXXXXXXXXXAGAATATGCATCAGAAACTGCTGAAGTATCAGAAGCCTGTGCATTCTGGTTAGAGCCTGCTGATGCATCAAGCCACACTATGGGATTTCTGGATGCCTTG
CAGTTTTGTTATCATTTTCATCTATGTTCATAATACCCAAATCATCATCATTGGCATCATCATCATCATCATCATCATCATCATCACCACTTCCACCTTTXXXXXXXXXXAGAATATGCATCAGAAACTGCTGAAGTATCAGAAGCCTGTGCATTCTGGTTAGAGCCTGCTGATGCATCAAGCCACACTATGGGATTTCTGGATGCCTTG
>Marker274618
ATTATGAATGGTAATATCGTAGTTCTTAAATCATTCATATGATAGTTTTCGTAATCATAATGCAAACTCTTATACTAATTCTCAAACGTATCTTAATTTGXXXXXXXXXXGTCTAGATAGTGAGCCACATTTTAATCCAGGAAATTTGTTCAGGCACAATTAATCGAAAATTATGTAGACAGTCAAGTGGAAACGTAAATTACACAATTT
ATTATGAATGGTAATATCGTAGTTCTTAAATCATTCATATGATAGTTTTCGTAATCATAATGCAAACTCTTATACTAATTCTCAAACGTATCTTAATTTGXXXXXXXXXXGTCTAGATAGTGAGCCACATTTTAATCCAGGAAATTTGTTCAGGCACGATTAATCGAAAATTATGTAGACAGTCAAGTGGAAACGTAAATTACACAATTT
>Marker282036
TTCTCTATATTAACAAGTTTATCATCTCGGCTCAAATTTCCGATTGACACTGCCATTCTCCGGTAATGTTGCCGACAATACCTCTGATCGGAAAACGTTTXXXXXXXXXXTCTATTTTAATGTTTCCCTTTTACAAATCCTCCCCCTTTTCAACCTTCCTTCATTAAATTTTCTTCCCAAAATTTAAGCCGTCGATGAATGTTCAAATTT
TTCTCTATATTAACAAGTTTATCATCTCGGCTCAAATTTTCGATTGACACTGCCATTCTCCGGTAATGTTGCCGACAATACCTCTGATCGGAAAACGTTTXXXXXXXXXXTCTATTTTAATGTTTCCCTTTTACAAATCCTCCCCCTTTTCAACCTTCCTTCATTAAATTTTCTTCCCAAAATTTAAGCCGTCGATGAATGTTCAAATTT
>Marker284918
ATGAGGGATACTTCTAAGAGTGACATGTATAGTCAGAGTGCTATCTCTTGCGAGAAAAATAGATGCCAGAAACAATAGCCACTCCAGCAGCAACGACACCXXXXXXXXXXTAAGATCCAACAAACGGTTGTTGAATGCAAATCTCAGTTATAGAAGTAATATCGCTCACTGAAACAGGCTGTTGCCAATGCTTCTTAATTCCTTGAAGAT
ATGAGGGATACTTCTAAGAGTGACATGTATAGTCAGAGTGCTATCTCTTGCGAGAAAAATAGATGCCAGAAACAATAGCCACTCCAGCAGCAACGACACCXXXXXXXXXXTAAGATCCAACAAACGGTTGTTGAATGCAAATCTCAGTTATAGAAGTAATATCGCTCAATGAAACAGGCTGTTGCCAATGCTTCTTAATTCCTTGAAGAT
>Marker284979
CTACGATCCGGCACAGAGATTCGTTATAATATGCACAATTCATACGAGTTTCTCATAGTTTGGAGAGAACAAATACTAAACTGATCTCGCTCATGCACCAXXXXXXXXXXAAACTAGGGACATTTTACCAGTTATTTTTCTCAGGACGGTGGAAAGTATGGAAAAAAAGCATTAGAACACTTGCCATTCTCGTCAGCTTCACAGGACGTG
CTACGATCCGGCACAGAGATTCGTTTAATATGCACAAATCATACGAGTTTCTCATAGTTTGGAGAGAACAAATACTAAACTGATCTCGCTCATGCACCAAXXXXXXXXXXAAACTAGTGACATTTTACCAGTTATTTTTCTCAGGACGGTGGAAAGTATGGAAAAAAAGCATTAGAACACTTGCCATTCTCGTCAGCTTCACAGGACGTG
>Marker285074
GAGGTTACACGCTTCAGGAGGATGTGTTCCGGTTCCGAAAGCTTCAACTGGCTGCAACACAAAGAATCATTGCAATCCAAGTTAGATAGCCTGAGTTTTAXXXXXXXXXXGAAATTAAGAACATCACAACAATATACTCTACAGGATTATAGAACGCACGAACTTGCCTTGTTTAGTGCTTCAAGGAGCAATGCCTCTGCTTCATCAAAG
GAGGTTACACGCTTCAGGAGGACGTGTTCCGGTTCCGAAAGCTTCAACTGGCTGCAACATAAAGAATCATTGCAATCCAAGTTAGATAGCCTGAGTTTTAXXXXXXXXXXGAAATTAAGAACATCACAACAATATACTCTACAGGATTATAGAACGCACGAACTTGCCTTGTTTAGTGCTTCAAGGAGCAATGCCTCTGCTTCATCAAAG
>Marker287926
CCCCACCACAACAACAGAAAACACACATAAAATCAGTGACCACAATCCGTCACTAATAATGTCAATACCAACTTCCCTCGTCGCCCTTGCCATATTGGCAXXXXXXXXXXGGCAGTTCAGGCTGAACCTCATAGGGCACACGCTGTTCTGGTGCTACCTGGCTCCCGACGACTCGCACCATGTCTCGTATGATGCGTTTAAGGAAGAGGA
CCCCACCACAACAACAGAAAACACACATAAAATCAGTGACCACAATCCGTCACCTAATAATGTCAATACCAACTTCCCTCGTCGCCCTTGCCATATTGGCXXXXXXXXXXGGCAGTTCAGGCTGAACCTCATAGGGCACACGTTGTTCTGGTGCTACCTGGCTCCCGACGACTCGCACCATGTCTCGTATGATGCGTTTAAGGAAGAGGA
>Marker288343
CACATCCATCCTAAGGAAGAGTAACCGTGAGGCTCCTTACTGTCTAACGGCTATAATATTCCAAAATAAACCTCCTTTTTTTTTACTCCGGGTGACGTGGXXXXXXXXXXAACCCACATTCCATCCTGAATAGCCGTTGGATAGCTTCACATCAACGGTTCAAATTCCACCAAGAATTCGACCGTTGAAGATAACGGGAGCTCAAAAGGA
CACATCCATCCTAAGGAAGAGTAACCGTGAGGCTCCTTACTGTCTAACGGCTATAATATTCCAAAATAAACCTCCTTTTTTTTTACTCCGGGTGACGTGGXXXXXXXXXXAACCCACATTCCATCCTGAATAGCCGTTGGATAGCTTCACATCAACGGTTCAAATTCCACCAAGAATTCGACCGTTGAAGATAACGGGGGCTCAAAAGGA
>Marker291088
AACTGTTCTTCATCAAGATATCCCTGCTCAAATAGAGACTGCTTCATCATGGCGACTTGCCTGTGTGACTGGCTTCTGTCCATTTTCTGGAAATATAAGCXXXXXXXXXXTGACATTTCACTAGATGTGATGTGGGTATTAGGAGGAGGTGGAATTCTGATTCTGCCCTCCAAAAAGGTAGAGAGCAAACCAAAACAAGAATCTAATGTG
AACTGTTCTTCATCAAGATATCCCTGCTCAAATAGAGACTGCTTCATCATGGCGACTTGCCTGTGTGACTGGCTTCTGTCCATTTTCTGGAAATATAAGCXXXXXXXXXXTGACATTTCAATAGATGTGATGTGGGTATTAGGAGGAGGTGGAATTCTGATTCTGCCCTCCAAAAAGGTAGAGAGCAAACCAAAACAAGAATCTAATGTG
>Marker293847
AAGTTCGAGCATAAGTTCTTGATTAGGTCGGGATTCAGGATTAGCTAGATTAGCTCCTGTTGTGTTAGTCACCCATGTTGGATTGCGCAACCCCCCAGGAXXXXXXXXXXTGATGCCTACTCAACCACAGGGTCACATTATTAGTTCAGATAGTCAGAATTTCTTTCTCTATCTCTTTTGTAGAGTCAACGTTTTACGTGAGTCTAGTTA
AAGTTCGAGCATAAGTTCTTGATTAGGTCGGGATTCAGGATTAGCTAGATTAGCTCCTGTTGTGTTAGTCACCCATGTTGGATTGCGCAACCCCCCAGGAXXXXXXXXXXTGATGCCTACTCAACCACAGGGTCACATTATTAGTTCAGATAGTCAGAATTTCTTTCTCTATCTCTTCTGTAGAGTCAACGTTTTACGTGAGTCTAGTTA
>Marker299947
CACCCACCTGGGTCCTCCCCTACCGACAACCCGACCCGACTTCTCTGTCTGTTTCCCGGGGCAAACCGCCGACGTGACCTTTACCGTTTCCCTTTCCCTCXXXXXXXXXXCTCCTGATGAGTGAGTCTATCGATTTTGTGCTGCCACAAGCTCTCCAGTATTATACATTGTGTGTTTATGGGTTTTCCAGTATGGGCTTGTCCCATTATA
CACCCACCTGGGTCCTCCCCTACCGACAACCCGACCCGACTTCTCTGTCTGTTTCCCGGGGCAAACCGCCGACGTGACCTTTACCGTTTCCCTTTCCCTCXXXXXXXXXXCTCTTGATGAGTGAGTCTATCGATTTTGTGCTGCCACAAGCTCTCCAGTATTATACATTGTGTGTTTATGGGTTTTCCAGTATGGGCTTGTCCCATTATA
>Marker299978
TCATCTCAACGATAAATGCAATCAGGGCTATCCCAGCTATGAACTTGATATGATCCATGGGAATCGGTAAGCGAAGACCTAACCGCGACAAACTAAGTCCXXXXXXXXXXATCCACTAGAGTCAGGTGGTCAACCCAATAGCGGTGGCACTTATCGAGCTCATATTGAGGTAAAGCCAAATAAAGTGCCACTTCATACTTCACCTCATTT
TTATCTCAACGATAAATGCAATCAAGGCTATCCTAGCTATGAACTTGATATGATCCATGGGAATCGGTAAGCGAAGACCTAACCGCGACAAACTAAGTCCXXXXXXXXXXATCCACTAGAGTCAGGTGGTCAACCCAATAGCGGTGGCACTTATCGAGCTCATATTGAGGTAAAGCCAAATAAAGTGCCACTTCATACTTCACCTCATTT
>Marker300036
CACCTCCGGCAAAGAGACCAGCACCAACGCAACCTGCTGCAACAAGAACATCATCTTCGGAGTCTTCCTCGTGAGAGTATCGTAGGGTGTTTGATTCCAGXXXXXXXXXXGTCGGATGTGTCCTTAGATTCCTCTTAGGCAATATAGATGCTTGCACAACTAGCAACAGTTCAGCCTCTAAATGGAACCGGTCGGACTAACTGTTGTATG
CACCTCCGGCAAAGAGACCAGCACCAACGCAGCCTGCTGCAACAAGAACATCATCTTCGGAGTCTTCCTCGTGAGAGTATCGTAGGGTGTTTGATTCCAGXXXXXXXXXXGTCGGATGTGTCCTTAGATTCCTCTTAGGCAATATAGATGCTTGCACAACTAGCAACAGTTCAGCCTCTAAATGGAACCGGTCGGACTAACTGTTGTATG
>Marker304015
TGCAAGCTAGCGCTTGAAATTACGAACATTGATCTCGCAGATCACTGAGGGTATTCCTAATGCCACAGCAGTTCAACTTGATGTGTCAGATCATGAAAGCXXXXXXXXXXTACTGCCTGCTAGTTTTCATGTAATTGTAGCAAACGAGTGCATAAAGGTATTCTCTACAACTCCGTTACCTACTTAGCCTCAAATTCTCATGGTGGATGG
TGCAAGCTAGCGCTTGAAATTATGAACATTGATCTCGCAGATCACTGAGGGTATTCCTAATGCCACAGCAGTTCAACTTGATGTGTCAGATCATGAAAGCXXXXXXXXXXTACTGCCTGCTAGTTTTCATGTAATTGTAGCAAACGAGTGCATAAAGGTATTCTCTACAACTCTGTTACCTACTTAGCCTCAAATTCTCATGGTGGATGG
>Marker304042
CGTAAGGTGCAAGCTATCTTTACATTCTGGCTAGAGTTGTGAAAGTTTCCTTAAATTGATTCAGCTGAAGAAGCACCTTGTTACTGCTAGCTATGTTGATXXXXXXXXXXAAGCTCGTATGCGTAACGGGAGAATAAAGTCTTTTACCTCTTACTGTGGAGGACTTCCTTCCCCAGCTGCTGCCAATAACCCTTTGGCTTATAAATTCAG
CGTAAGTTGCAAGCTATCTTTACATTCTGGCTAGAGTTGTGAAAGTTTCCTTAAATTGATTCAGCTGAAGAAGCACCTTGTTACTGCTAGCTATGTTGATXXXXXXXXXXAAGCTCGTATGCGTAACGGGAGAATAAAGTCTTTTACCTCTTACTGTGGAGGACTTCCTTCCCCAGCTGCTGCCAATAACCCTTTGGCTTATAAATTCAG
>Marker304465
TGTTCTTGGTAGAGGCAAATTATGCTGCTTTTCTTGGCATTAGGCACATGAATTAAGTCTGTTTGGCAAGTTCTTCGTGACACAAATTTTGGTGGAATGGXXXXXXXXXXTGATCAGTCAGTCAAGCTATGTAGAACTTGCAGTTCATGTCAATGCTTGTGGAATCTTACAGAAGATTAATCAGTTTTGGTGTATAGATGAAAAACCGGA
TGTTCTTGGTAGAGGCAAATTATGCTGCTTTTCTTGGCATTAGGCACATGAATTAAGTCTGTTTGGCAAGTTCTTCGTGACACAAATTTTGGTGGAATGGXXXXXXXXXXTGATCAGTCAGTCAAGCTATGTAGAACTTGCAGTTCATGTCAATGCTTGTGGAATCTTACAGAAGATTAATCAGTTTTGGTGTATCGATGAAAAACCGGA
>Marker304630
TCAAAACCCAAATTTGAATACATTTCGACACACAAAAATATAGTTTATAACGAGAAAAGGTGTGTCGAAAATACATCACATCAGCGATTGAGGAGAGTTTXXXXXXXXXXCACAATTCTTCTCTACATAGGTTACGCCCTTTTGAGACTGCCGACCGACTACCAATCCTAGAATCTCAATCCGCTCTCTCGAGTCAAGAATCTGAAACCT
TCAAAACCCAAATTTGAATACATTTCGACACACAAAAATATAGTTTATAATGAGAAAAGGTGTGTCGAAAATACATCACATCAGCGATTGAGGAGAGTTTXXXXXXXXXXCACAATTCTTCTCTACACAGGTTATGCCCTTTTGAGACTGCCGACCGACTACCAATCCTAGAATCTCAATCCGCTCTCTCGAGTCAAGAATCTGAAACCT
>Marker304806
ATAAAAGAAATGAACATAAACATAATGTAAACACTTAATCATAAAATCATGTAAATCAATCAAATTAATAAAACATAACCCAAATACAACAACATAAAGAXXXXXXXXXXGTCATCCGGAGATTATGGATACAACGGACGAAACCTGTTGTTGGCGAGGGCGGAAAGTGTCGGCTGCTACAATGTGAGAGGCTGTGAAGTTGAATCAAGA
ATAAAAGAAATGAACATAAACATAATGTAAACACTTAATCATAAAATCATGTAAATCAATCAAATTAATAAAACATAACCCAAATACAACAACATAAAGAXXXXXXXXXXGTCATCCGGAGATTATGGATACGACGGACGAAACCTGTTGTTGGCGAGGGCGGAAAGTGTCGGCTGCTACAATGTGAGAGGCTGTGAAGTTGAATCAAGA
>Marker309876
TTCACGTCTCCCTTCTGCTGTGGATCGAGCTCTTTTCGATGTATGCTTATCTTTTTCCTCCTTGAAACAACTCCAGTATGCTCCTGATGCTCAGCCTTCGXXXXXXXXXXTCCAGTATGCTCCTGATGCTCAGCCTTCGCAATATGTTCCTTACGAGGGGACATAATGAAGAAACTCCAGGTTTCTTCGGGATTATTCCACCCTTCGAAA
TTCACGTCTCCCTTCTGCTGTGGATCGAGCTCTTTTCGATGTATGCTTATCTTTTTCCTCCTTGAAACAACTCCAGTATGCTCCTGATTCTCAGCCTTCGXXXXXXXXXXTCCAGTATGCTCCTGATTCTCAGCCTTCGCAATATGTTCCTTACGAGGGGACATAATGAAGAAACTCCAGGTTTCTTCGGGATTATTCCACCCTTCGAAA
>Marker310025
ATAATAACCTACCAAACAAGCAGGCTAGCGACGACTCAGAAGTTCCATAGAAATGAATGATACGAATAAGCCTGATCGTCCCCAGCCATTTGATCATGATXXXXXXXXXXTGGTGCGACTGGGAATCCAACATTCCCAAAAACGACCAATCAATTGGCGTTTCATGAATAGCTGCAGTAGTGGTTGTTGTGGTAGTAGTAATGACGGCGG
ATAATAACCTACCAAACAAGCAGGCTAGCGACGACTCAGAAGTTCCATAGAAATGAATGATACGAATAAGCCTGATCGTCCCCAGCCATTTGATCATGATXXXXXXXXXXTGGTGCGACTGGGAATCCAACATTCCTAAAAACGACCAATCAATTGGCGTTTCATGAATAGCTGCAGTAGTGGTTGTTGTGGTAGTAGTAATGACGGCGG
>Marker313552
TTTTTGTAGTCAACACCAGAAGCATCTTCAGAGGCAGACATGAGCATCTCCGATTTGATAGAACTGGAACCATCCATTGACTGGCTATGTTGGTGCCTAAXXXXXXXXXXCAGTCCAGTTGTTGTCAGCAGGAGATAAGAAATGATTAGACGACTCCCCAATTTGAAAACCAGAGGTAGCAGAGGAGGAATTCAGCTTCTCCATATTGAG
TTTTTGTAGTCAACACCAGAAGCATCTTCAGAGGCAGACATGAGCATCTCCGATTTGATAGAACTGGAACCATCCATTGACTGGCTATGTTGGTGCCTAAXXXXXXXXXXCAGTCCAGTTGTTGTCAGCAGGAGATAAGAAATGATTAGACGACTCCCCAATTTGAAAACCAGAGGTAGCTGAGGAGGAATTCAGCTTCTCCATATTGAG
>Marker313576
CATATTCTTGGGTGGGTTATCAGACATTCGGCTGATATCATGACTGAATCTGCCAGAATCTGAGCTAGTAAGCGGCGGAAATGTAGGAGAAGAAGGCAGCXXXXXXXXXXTTCCTTTTGAAAGAAGACAGAGTAGGGTTTTCCCGGAAGGTGCTAGTAGTAGTGAAGTGAGAGGAGAGTGCAGGACACCTGAGTGGGGGTTGTTGCCGGC
CATATTCTTGGGTGGGTTATCAGACATTCGGCTGATATCATGACTGAATCTGCCAGAATCTGAGCTAGTAAGCGGCGGAAATGTAGGAGAAGAAGGCAGCXXXXXXXXXXTTCCTTTTGAAAGAAGACAGAGTAGGGTTTTCCCGGAAGGTGCTAGTAGTAGTGAAGTGAGAGGAGAGTGCAGGACACCTAAGTGGGGGTTGTTGCCGGC
>Marker313599
GTTGGGATTGAGGTTCAACAAGGCAACTGGACATCTTTATATTGCAGATGCCTATTACGGGCTTCTCGTCGTTGGTCCTCAAGGAGGAGTAGCAACCCCTXXXXXXXXXXTATATATAGGAGTCATTTCTTCATTCTGTTGGAAGGAGAAGCAACTGGTAGACTCCTTCGCTATGATCCTCCAACCAATCAAACTCATGTCGTTGTGGAC
GTTGGGATTGAGGTTCAACAAGGCGACTGGACATCTTTATATTGCAGATGCCTATTACGGGCTTCTCGTCGTTGGTCCTCAAGGAGGAGTAGCAACCCCTXXXXXXXXXXTATATATAGGAGTCATTTCTTCATTCTGTTGGAAGGAGAAGCAACTGGTAGACTCCTTCGCTATGATCCTCCAACCAATCAAACTCATGTCGTTGTGGAC
>Marker316238
AAGGATGCATACCATTCGCTTCTGGAAGGGGAGACGGATGAGGTGATTTTCAGAGTGATGGACGACATTATCTCTTGGCTTGATCATCACCATACTGATCXXXXXXXXXXGTTGAATGGATATTTATGGGAGAAAATAAGGGGAACTGGATCAATTAACTTCAACATGTTGAGTGATAATTAATCGAAAGATTGAAGATGAATAATCTAA
AAGGATGCATACCATTCGCTTCTGGAAGGGGAGACCGATGAGGTGATTTTCAGAGTGATGGACGACATTATCTCTTGGCTTGATCATCACCATACTGATCXXXXXXXXXXGTTGAATGGATATTTATGGGAGAAAATAAGGGGAACTGGATCAACTAACTTCAACATGTTGAGTGATAATTAATCGAAAGATTGAAGATGAATAATCTAA
>Marker316781
GCATAATGTATTCTCTAGAGTATTTTTTTATGAAAATCTATTGCACTTTTATTGGTTAGAAGAAATTGTTACACCATCTAATTTAAACTGGTCAATTAGGXXXXXXXXXXCTAACCCATTATTGACACGTTTGACAAGGTCCAAACAGTCACTCTCCAAAATAACATGTATGTAGTTATGTTCTTTGGTTGCCTCTAAACCCATCTCTGC
GCATAATGTATTCTCTAGAGTATTTTTTTATGAAAATCTATTGCACTTTTATTGGTTAGAAGAAATTGTTACACCATCTAATTTAAACTGGTCAATTAGGXXXXXXXXXXCTAACCCATTATTGACACGTTTGACAAGGTCCAAACAGTCACTCTCCAAAATAACATGTCTGTAGTTATGTTCTTTGGTTGCCTCTAAACCCATCTCTGC
>Marker318745
CAAAGGGTTTTTAAATACACTAATTACCCACTAACAATTACCTAATTATTCTAAATATTCACTAACATTCTCTAATTACATTAATCATTCACTAAAAATTXXXXXXXXXXTTACATTAATCATTCACTAAAAATTCTCTAATTACACTAATCATTCACTAAAAATTCCCTACTTACACTAATCATTCAATATTAAATTCATTAAAAAGGG
CAAAGGGTTTTTAAATACACTAATTACCCACTAACAATTACCTAATTATTCTAAATATTCACTAACATTCTCTAATTACATTAATCATTCACTAAAAATTXXXXXXXXXXTTACATTAATCATTCACTAAAAATTCTCTAATTACACTAATCATCCACTAAAAATTCCCTACTTACACTAATCATTCAATATTAAATTCATTAAAAAGGG
>Marker320814
AAGCAGAAAATATAAGGTCTTTTCTTCTCGGTGTATTCTTTGAACTTCTCTTGATCTCCAGGGGTTTCCCAATTGTTGGAGTCATATATGTATAGGTGCAXXXXXXXXXXTTATTTCTCCCTAATATTCGGTTTCATGGAGTGAATCAACCATGACCGAACTAGGGCATCATTATGATACCAGCTTTGAAATAGGGGGTCTGTAGTTTCG
AAGCAGAAAATATAAGGTCTTTTCTTCTCGGTGTATTCTTTGAACTTCTCTTGATCTCCAGGGGTTTCCCAATTGTTGGAGTCATATATGTCTAGGTGCAXXXXXXXXXXTTATTTCTCCCTAATATTCGGTTTTATGGAGTGAATCAACCATGACCGAACTAGGGCATCATTATGATACCAGCTTTGAAATAGGGGGTCTGTAGTTTCG
>Marker320950
CAAATTAAATCTTTGTTTTACCTCTTTTAGAGTCCATTTAGTGTAGGATTTATGGTTGAACTAAGGAGGTCAAGAAAAGAGTTTTCATTATTAATCATATXXXXXXXXXXGAAAGTTTGTGAACACAATCTGATTTTTCGTAAAATTCTTCTCTAGAGCTCTCTTCTTTGTTACTCTCTTATGTATGCCAGTGTTGGTGGGTGAACCTTT
CAAATTAAATCTTTGTTTTACCTCTTTTAGAGTCCATTTAGTGTAAGATTTATGGTTGAACTAAGGAGGTCAAGAAAAGAGTTTTCATTATTAATCATATXXXXXXXXXXGAAAGTTGGTGGACACAATCTGATTTTTCGTAAAATTCTTCTCTAAAGCTCTCTTCTTTGTTGCTCTCTTATGTATGGAAGTGTTGGTGGATGAACCTTT
>Marker321003
TCTTTCACTCCTTTCTTAGGCAGGCACCACTCTCCTTTTGTTTTCGCCACTTTCGGAGCTGGAGCCGCCGTCGGTATTAGGCTCATCTAAAACACAAAACXXXXXXXXXXACTGGCACTGCTGTAGTTTTTGTTTTCGGTCCTCATTAATCCGACGTCATAAGTTGCAGTGAGGTCTGAGTTAAAGAGCCCGAAACCCCGTTCGGATCCC
TCTTTCACTCCTTTCTTAGGCAGGCACCACTCTCCTTTTGTTTTCGCCACTTTCGGAGCTGGAGCCGCCGTCGGTATTGGGCTCATCTAAAACACAAAACXXXXXXXXXXACTGACACTGCTGTAGTTTTTGTTTTCAGTCCTCATCAATCCGACGTCATAAGTCGCAGTGAGGTCTGAGTTAAAGAGCCCGAAACCCCGTTCGGATCCC
>Marker321058
TTTAAATTGGATTTTCATATTCCCAAATTCTGTCGGATTCATCAATAATTGCGTCTAAAGGTTGTCAAAGATTGTGCCTTTCTTACGCGTAATCCTTGACXXXXXXXXXXTTAAATTGGATTTTCATATTCCCAAATTCTGTCGGATTCATCAATAATTGCGTCTAAAGGTTGTCAAAGATTGTGCCTTTCTTACGCGTAATCCTTGACA
TTTAAATTGGATTTTCATATTCCCAAATTCTGTCGGATTCATCAATAATTGCATCTAAAGGTTGTCAAAGATTGTGCCTTTCTTACGCGTAATCCTTGACXXXXXXXXXXTTAAATTGGATTTTCATATTCCCAAATTCTGTCGGATTCATCAATAATTGCATCTAAAGGTTGTCAAAGATTGTGCCTTTCTTACGCGTAATCCTTGACA
>Marker321065
ATCAAGTAACAAATGGAGATGTCACAGCCCTTACCCTCGTAGCTACTTTACTACACTTTGCTTCCTATGCAATAAAATCCATAAACTGGGTAAAGAACATXXXXXXXXXXGTGACAGTTAGGGAGTGTTCTCAAATTTCATCATCAACAACTCCCTGACAGTAGAAGAAGTGGATTTTGTCTGCCGAGACTTCCCCTTCAATCAATAGGG
ATCAAGTAACAAATGGAGATGTCACTGCCCTTACCCTCATAGCTACTTTACTACACTTTGCTTCCTATGCAATAAAATCCATAAACTGGGTAAAGAACATXXXXXXXXXXGTGACAGTTAGGGAGTGTTCTCAAATTTCATCACCAACAACTCCCTGACCGTAGAAGAAGTGGATTTTGTCAGCCGAGACTTCCCCTTCAATCAATAGGG
>Marker322685
TTCACCAGAGGAGGCGAGGGAGCAGATACTTAGCATATGGGACAAGGCAGAGATAATCAAGGTGAGCGACGTGGAGCTTGAATTCCTGACAGGAAGTGACXXXXXXXXXXTCTGACTACCCAGCTTGATTATTTTGAGTGTTAATTAAGATAAATAATTGCTAGTGGCATCACATAATAATATAGTTTTAGCAGCAGGGCAGCTGTCTAC
TTCACCAGAGGAGGCAAGGGAGCAGATACTTAGCATATGGGACAAGGCAGAGATAATCAAGGTGAGCGACGTGGAGCTTGAATTCCTGACAGGAAGTGACXXXXXXXXXXTCTGACTACCCAGCTTGATTATTTTGAGTGTTAATTAAGATAAATAATTGCTAGTGGCATCACATAATAATATAGTTTTAGCAGCAGGGCAGCTGTCTAC
>Marker322740
TTGTGTCTTTCTCGATCAATTCAAAAGGACATATATAATAGCCGAGGTTTTCAGTTCCTTGTGAGCCAAGCAAACGAAATCTTGTTTTGTGACGGTATGAXXXXXXXXXXTTGAATAATGGTTTCCCTAATATAAAGTCAATTAATCGATCAATTGAGAGAAAATTAGTGAAGCTAAATGATATGATTAGTTGTCTAACGCTTGATTAAT
TTGTGTCTTTCTCGATCAATTCAAAAGGACATATATAATAGCCGAGGTTTTCAGTTCCTTGTGAGCCAAGCAAACGAAATCTTGTTTTGTGACGGTATGAXXXXXXXXXXTTGAATAATGATTTTCCTAATATAAAGTCAATTAATCGATCAATTGAGAGAAAATTAGTGAAGCTAAATGATATGATTAGTTGTCTAACGCTTGATTAAT
>Marker324464
CAAATATTTTAGAGATAATCCTCAATAAAGCGGTGGATCGAACTCTCATTTCCGCGGCAACAATCTCCTTGTTTTATCACTGAGACACTTTCTTATTAATXXXXXXXXXXTCACCATCATATCCTTCTAACTTTTTATGTGCGATTTTTAAACTACACGATAACTAATTACGATATTTCTTAGTTATACGAATAACTAGTTACAATTTTA
CAAATATTTTAGAGATAATTTTCAATGGAGCGGTGGATCGAACCCTTATTTTCGCGGCAACAATTTTTTTGTCTTATCACTGAGATACTTTCTTATTGGTXXXXXXXXXXTCACCACCATATCCTTCTAACTTTTTATGTGCGATTTTTAAACTACACGACAACTAATTACGATATTTCTTAGTTATACGAATAATTGGTTACAATTTTA
>Marker325357
CGTACTTTGTTCATTCGGATTGAGACCCAAGTTGCGTCCCTCACTTCACCTTCACCCTTGAGTTCCACCATTTTCGAGGAAGGTGTCGAACTAGTTAATGXXXXXXXXXXTATTTGCAAAGTATACATTCTCTTCTTGAGTTACGTGATGACTTAAAAGTTCAGTTCTTAATCTTCATGGGATGATGGCATGCTCGTCCATGAAATTAAA
CGTACTTTGTTCGTTCGGATTGAGACCCAAGTTGCGTCCCTCACTTCACCTTCACCCTCGAGTTCCACCATTTTCGAGGAAGGTTTCGAACTAGTTAATGXXXXXXXXXXTATTTGCAAAGTATACATTCTCTTTTTGAGTTACGTGATGACTTAAAAGTTCAGTTCTTAATCTTCATGGGATGATGGCATGCTCGTCCATGAAATTAAA
>Marker326151
AATCATTTTACGGGCTCGTTATGTCGTTACGTTCACCTTACGAGTAGTTGAATACATCATCGTTATGTCCAGTTTATGACTCTTTTATGTCGATGATATAXXXXXXXXXXAGAGAAAGAAAAGTTGAAACAAAGAGAGTATTTTTGTAACTCCTCTTATACCCTTGGTAAAATTCTAACTGTCAAATTGAAAATGACAGAAATGAATTTT
AATCATTTTACGGGCTCGTTATGTCGTTACGTTCACTTTACTTACGAGTAGTTGAATACATAATCGTTATGTCCAGTTTATGACTCTTTTATGTCGATGAXXXXXXXXXXAGAGAAAGAAAAGTTGAAACAAAGAGAGTATTTTTGTAACTCCTCCTATACCCTTGGTAAAATTCCAACCGTCAGATTGAAAATGACAGAAATGAATTTT
>Marker326617
ATTGTCCAATGGAGATTTTCATCGCAAGTCAATGCTAGGGAATCCCAATACTCTAGCAAGCACTTCTTCTTCACTGTCTTTGAAAAACACAGTCCAAGGAXXXXXXXXXXTTCTTCTGCCAGAGGGAAAAAGACGTCTGGCTCATCTCTGGAAGGGCTGCAAAGTTCTACGAGTAGGGTATTCATCTCCGATGCTAGACGAGCCAGGATT
ATTGTCCAACGGAGATTTTCATCGCAAGTCAATGCTAGGGAATCCCAATACTCTAGCAAGCACTTCTTCTCCACTGTCTTTGAAAAACACAGTCCAAGGAXXXXXXXXXXTTCTTCTGCCAGAGGGAAAAAGACGTCTGGCTCATCTCTGGAAGGGCTGCAAAGTTCTACGAGTAGGGTATTCATCTCCGATGCTAGACGAGCCAGGATT
>Marker329949
AGACTTCACAAACAGAGTTGTATGGGTCGCGGGTTTCCGCAAATGCGTTAACCTCGGTCCTTGCTCACCAGTATATGGACATCGACAAAGAAACAAAGTCXXXXXXXXXXCGACTGGTCTCAAGCCAAACTTTTTGGGCGACTTGTGCGATTCCCCCCTGAGGTTTCTTCAATGGCACGGATCACAATAGCGCTGTGTGGGTCGAATCAT
AGACTTCACAAACAGAGTTGTATGGGTCGCGGGTTTCCGCAAATGCGTTAACCTCGGTCCTTGCTCACCAGTATATGGACATCGACAAAGAAACATCAGCXXXXXXXXXXCGACTGGTCTCAAGCCAAACTTTTTGGGCGACTTGTGCGATTCCCCCCTGAGGTTTCTTCAATGGCACGGATCACAATAGCGCTGTGTGGGTCGAATCAT
>Marker339335
AAGTTTCATATTCTTAGCTCGAAAGAACGGAATGAGAATCTAGGATTGTTAGTAGGTTAGCATACCCGAAAGGGCGTGACCTAAGTAGAGAAGAATTATGXXXXXXXXXXAATCACCCTAACCGGCTGAATGGGTTTACCCTTTAGCTAGAGAAATCTTTTATGGGGGACCTCGCTTAGGAAGTTTAAGAACTGGGCGGTAGCGGTGGCA
AAGTTTCATATTCTTAGCTCGAGAGAACGGAATGAGAATCTAGGATTGTTAGTAGGTTAGCATACCCGAAAGGGCGTGACCTAAGTAGAGAAGAATTATGXXXXXXXXXXAATCACCCTAACCGGCTGAATGGGTTTACCCTTTAGCTAGAGAAATCTTTTATGGGGGACCTCGCTTAGGAAGTTTAAGAACTGGGCGGTAGCGGTGGCA
>Marker340798
CTGTTTCAAAACCGTTTTCCTTTGTTTCCTGAGTTAAACTATAAATCCTCTATTTCAAAACGTCACAACGCCCGCGGTAGTCTGCAGTCGTGCCTGTGGTXXXXXXXXXXGACTAAATTTCGGTTTGATTAAAAATCTTACTTGATAAGTAGAAGTCGGGAGCTGGACACCGAATTAATTTCATTAATTCGAGGAGTTGACTCAGGAGTT
CTGTTTCAAAACCCTTTTCCTTTGTTTCCTGAGTTAAACTATAAATCCTCTATTTCAAAACGTCACAACGCCCGCGGTAGTCTGCAGTCGTGCCTGTGGTXXXXXXXXXXGACTAAATTTCGGTTTGATTAAAAATCTTACTTGATAAGTAGAAGTCGGGAGCTGGACACCGAATTAATTTCATTAATTCGAGGAGTTGACTCAGGAGTT
>Marker343032
TCTTTCTTTAACGTCTTTGAGCTAGACGATACCTCACATTTTTACTCTGGTTATCGAAGTAATGAACTTTGACTCCATTAGAAGGATCGGCAGTGAGATAXXXXXXXXXXTATCTCCTTTATTGAATTTCTTGACACCTTGAAGCTTAAAATCATGGATGTGTTTCATCTTTTCTTTATAGAGCCAAGAGCTCTCACATGCATGATACCC
TCTTTCTTTAACGTCTTTGAGCTAGACGATACCTCACATTTTTACTCTGGTTATCGAAGTAATGAACTTTGACTCCATTAGAAGGATCGGTAGTGAGATAXXXXXXXXXXTATCTCCTTTATTGAATTTCTTGACACCTTGAAGCTTAAAATCATGGATGTGTTTCATCTTTTCTTTATAGAGCCAAGAGCTCTCACATGCATGATACCC
>Marker343100
GTTAGATGACCGTTCGAAAGTAGCCGTTGGAGGCTCCCTACAACGCGGCGCGCGCCGTAGGATGCGCTGCACATTGTAGGTAGCCTCCAACGAATTCTATXXXXXXXXXXCCAACACCTCCGTGTGTCGACCCCGAGGCGATCGATGGAGAACTACTTTGGGGCGAGCGCAACCGACATCGAGCTGGTGAAATTTTCGACAATGATGTTG
GTTAGATGACCGTTCGAAAGTAGCCGTTGGAGGCTCCCTACAACGCGGCGCGCGCCGTAGGATGCGCTGCACATTGTAGGTAGCCTCCAACGAATTCTAAXXXXXXXXXXCCAACACCTCCGTGTGTCGACCCCGAGGCGATCGATGGAGAACTACTTTGGGGCGAGCGCAACCGACATCGAGCTGGTGAAATTTTCGACAATGATGTTG
>Marker343485
CCTACTCTTTCTTTTATCCCATCCATGTCCACAAAATTTGCTATTTCAACAATGTGGATATGTAACTGTTACTAGCTATATATTTTGGCAAGGTGGGGAAXXXXXXXXXXGATGCTGGAATCTTAGTTGAACAAATTGTCAGCTCCATCAGAACAGTAGGTCCTTTCTCCATTTTTTACTACACTTATGTATCAGATGGCATCATTTACT
CCTGCTCTTTCTTTTATCCCATCCATGTCCACAAAATTTGCTATTTCAACAATGTGGATATGTAACTGTTACTAGCTATATATTTTGGCAAGGTGGGGAAXXXXXXXXXXGATGCTGGAATCTTAGTTGAACAAATTGTCAGCTCCATCAGAACAGTAGGTCCTTTCTCCATTTTTTACTACACTTATGTATCAGATGGCATCATTTACT
>Marker345972
GTGAAGATTGAGGATGCGAAGTATTCTACCTATCTTTGTTATATACTTCTCTCTTGTGACCTTTTAGGAAGCACATCCAGTAATCCATCTTTGCTCTATGXXXXXXXXXXGATTTTTTTTATAAAGTGGCAAAACTTCTTATTAAGGATATAACAAAATCGTAAAAATTTGGTGTTTGAGAGTCATGAGGATCTATGGGGGCAGACTGTG
GTGAAGATTGAGGATGAGAAGTATTCTACCTATCTTTGTTATATACTTCTCTCTTGTGACCTTTTAGGAAGCACATCCAGTAATCCATCTTTGCTCTATGXXXXXXXXXXGATTTTTTTTATAAAGTGGCAAAACTTCTTATTAAGGATATAACAAAATCGTAAAAATTTGGTGTTTGAGAGTCATGAGGATCTATGGGGGCAGACTGTG
>Marker348483
TTTAGAGATATGTGGTCTAGCTATAAGGCTTTGGATGCGGAATAGAGCATGATTGGAGCTCGAACAGAAGAACGAAACAAGAAATTGTGAAGAAGAAGGGXXXXXXXXXXGGGGTAGAGAGTCTGCATCGATTACAGGAGACTTAATGATGCCACCCGAAAGGATTACTTCTCGTTCCCGTTCATGGATTAGATGCTTGAACACCTCGCT
TTTAGAGATATGTGGTCTAGCTATAAGGCTTTGGATGCGGAATAGAGCATGATTGGAGCTCGAACAGAAGAACGAAACAAGAAATTGTGAAGAAGAAGGGXXXXXXXXXXGGGGTAGAGAGTCTGCATCGATTACAGGAGACTTAATGATGCCACCCGAAAGGATTACTTCTCGTTCCAGTTCATGGATTAGATGCTTGAACACCTCGCT
>Marker348538
TCCCATTTTTCTCGAAACAAGTTTAGAAGAGATTTATGCACTTGGTTACTCTGTCTTGATGCGTTTTGACTTTGTGAACAATTAATTTCCCTATCGATCGXXXXXXXXXXGATGCGTTTTGACTTTGTGAACAATTAATTTCCCTATCGATCGTCACTCTAGTTGTTTAAAGTCATATTTGACTATATGGTCCAAATAAGGTGCAAAAGA
TCCCATTTTTCTCGAAACTAATTTAGAAGATATTTATGCACTTGGTTACTCTGTCTTGATGCGTTTTGACTTTGTGAACAATTAATTTCCCTATCGATCGXXXXXXXXXXGATGCGTTTTGACTTTGTGAACAATTAATTTCCCTATCGATCGTCGCTCTAGTTGTTTAAAGTCATATTTGACTATATGGTCCAAATAAGGTGCAAAAGA
>Marker350407
TACTCTTGCCCAAGCACGTTTTCACTTTGAAGTTCTGATGGGATCTAGTGCATTAGTGGTGGTATGATCCCACCCGTCTACTTCTCACGCTCATGTGTATXXXXXXXXXXAACAATGTTATCTCGTTAAACGTGTTTATAACCTAGCCGGGGGGAAATTGAAAAAAGATGGTGTGCCACATGAGGAAGTCCTTAGTGGTCACCCATCTTA
TACTCTTGCCCAAGCACGTTTTCACTTTGAAGTTCTGATGGGATCTGGTGCATTAGTGGTGGTATGATCCCACCCGTCTACTTCTCACGCTCATGTGTATXXXXXXXXXXAACAATGTTATCTCGTTAAACGTGTTTATAACCTAGCCGGGGGGAAATTGAAAAAAGATGGTGTGCCACATGAGGAAGTCCTTAGTGGTCACCCATCTTA
>Marker352099
ACCCTTTTACACCAACAGTTGTGATTTTAAGCTAGGAAAACGCACAAACTACATCTTTCATGCCTTATCCAGCATCAACCAACATAACTGTTATGCTTCAXXXXXXXXXXTCTTCTGCCATTCAAGACTAAATATCTTAAATGTCCCCTTTCTTTAAAGGAATGCATTGATCATTTAGAATACAAATCTCCAACACAAGGTAAAGAATAG
ACCCTTTTACACCAACAGTTGTGATTTTAAGCTAGGAAAACGCACAAACTACATCTTTCATGCCTTATCCAGCATCAACCAACATAACTGTTATGCTTCAXXXXXXXXXXTCTTCTGCCATTCAAGACTAAATATCTTAAATGTCCCCTTTCTTTAAAGGAATGCATTGATCATTTAGAATACAAATCTCCAACACAAGGTAAAAAATAG
>Marker354056
CACAAATCAATGACGATGATTCAATTAAGATGATGAAAAAATTTAATCAGAAATTAGGTTAGCAAGAAGACATCATAAGTCTGAATAACCTCGTTAACAAXXXXXXXXXXAAAGGTTATCTCGTCTCAGAACTCGAATCTCTATCTAGAATAATATGTATTTGAAGTATATCTCGTCTTTAGGTGGTCTCTTGGGTATTTAAGGCTTCTG
CACAAATCAATGACGATGATTCAATTAAGATGATGAAAAAATTTAATCAGAAATTAGGTTAGCAAGAAGACATCATAAGTCTGAATAACCTCGTTAACAAXXXXXXXXXXAAAGGTTATCTCGTCTAAGAACTCGAATCTCTATCTAGAATAATATGTATTTGAAGTATATCTCGTCTTTAGGTGGTCTCTTGGGTATTTAAGGCTTCTG
>Marker354254
CACGCCCCAAACTTCATAAAGATAGGGAATACGTCAAAACCATTAGGATCGCCCTACGTGTTTCGATTGCAAACCAAACGTCCACGACATTTTTTTACTTXXXXXXXXXXACATCCACAAATAGAATGACAACCCTAACATGCGTTCACTAACATCCACAAATTAAGCTCAAGAGGGATATTCATCGTTTTTGGACCTGGCTTGTGAGGG
CACGCCCCAAACTTCATAAAGATAGGGAATACGGCAAAACCATTAGGGTCGCCCTACGTGTTTCGATTGCAAACCAAAAGTCCACGACATTTTTTTACTTXXXXXXXXXXACATCCACAAATAGAATGAGAACCCTAACATGCGTTCACTAACATCCACAAACTAAGCTCAAGAGGGATATTCATCGTTTTTGGACCTGGCTTGCGAGGG
>Marker354392
CTCGGTGTCGGACGGAGGCAACCTGGGAATTCTGTGTCGACGGACACTACTGTGTAGCTTCTCAAACAGACTTCCATGGCGTGGAGCTCTTGATCGAAATXXXXXXXXXXTATTATCGGAGAGTTTCTTTGTTCGACAGTAAGGATTGATGGAGAAGAAGAGAGAGTAAAAGCAATCTCCGAAAGCTACTTACTTGCTATGTATAAGGTC
CTCGGTGTCGGACGGAGGCAACCTGGGAATTCTGTGTCCACGGACACTACTGGGTAGCTTCTCAAACAGACTTCCATGGCGTGGAGCTCTTGATCGAAATXXXXXXXXXXTATTATCGGAGAGTTTCTTTGTTCGACAGTAAGGATTGATAGAGAAGAAGAGAGAGTAAAAGCAATCTCCGAAAGCTACTTACTTGCTATGTATAAGGTC
>Marker357022
CTCACTGATCACTCTGCAACTCTGTGCATGCTTTGCTTTCAATTGCCCAATGTGTATTCAATACTATTCCCCACACTTCCCCCACCTTTGCTTTGCCCTGXXXXXXXXXXGCTTTTACCTGCCATCTTTACTTGTAATTATATGTTCAACCCTAGAGTCGCATGGGGTGGACAATAAGAGCACTGGGTCTGGGAATCGACGGGTTTGTGT
CTCACTGATCACTCTGCAACTCTGTGCATGCTTTGCTTTCAATTACCCAATGTGTATTCAATACCATTCCCCACACTCCCCACACCTTTGCTTCGCCCTGXXXXXXXXXXGCTTTTACCTGCCATCTTTACTTGTAATTATATGTTCAACCCTAGAGTCGCATGGGGTGGACAATAAGAGCACTGGGTCTGGGAATCGACGGGTTTGTGT
>Marker361036
TGTAGTCGTTGGTGCATGTATGTTTCTACTCATTTCCTAGAAACTATACTCATCTTCTACAATATATTGGTCTCTATACTCGTTTTATTTGTCTTTATAAXXXXXXXXXXCTTTGTTAGGTAAAGAGCAGCTAGGTAGCTTATCAAGCCTGGACACATTGTCATTCGGACAGTCGCGAATGATACTTGTTTAACAAAGTGCACCAAAATA
TGTAGTCGTTGGTGCATGTATGTTTCTACTCATTTCCTAGACACTATACTCATCTTCTACAATATATTGGTCTCTATACTCGTTTTATTTGTCTTTATAAXXXXXXXXXXCTTTGTTAGGTAAAGAGCAGCTAGGTAGCTTATCAAGCCTGGACACATTGTCATTCGGACAGTCGCGAATGATACTTGTTTAACAAAGTGCACCAAAATA
>Marker361426
GAGCTTCTTACTATTGCAACTACTTGAAATTGACATGAAGAATAGTAGATTGATTTTTTGCTTAGTTTGGTTAATTTCTGTCCAAGTCGGTTGCTTTTGCXXXXXXXXXXTTCCATCATGTTCTGATTTTAGTCTCTGATGTTCCTTTTTTTTGTGAACTCTGTAGCAAGCTCATGTCAGGCAGGGTGAAGAGAGAAGCAGTTGATGCTG
GAGCTTCTTACTATTGCAACTACTTGAAATTGACATGAAGAATAGTAGATTGATTTTTTGCTTAGTTTGGTTAATTTCTGTCCAAGTCGGTTGCTTTTGCXXXXXXXXXXTTCCATCATGTTCTGATTTTAGTCTCTGATGTTCCTTTTTTTTGTGAACTCTGTAGCAAGCTCATGTCAGGCAGGGTGAAGGGAGAAGCAGTTGATGCTG
>Marker363482
AATGAGCCATGGAGTCGCTAATGATAACCGGCAAGCCAACTAAGAAATGCTCCTGAAGAAACCCTTCCAGAGATAAGCCAGACTTCTTCGCCACAAGTTTXXXXXXXXXXTAGATTCCCTATCTTTCGCGGAAACGAACTGAACGGCGGATTCCAGGTCCCCCCGGAGCAACATTCCGCCCATGATCAAGCCCATGTCTAAAACCCTAAG
AATGAGCCATGGAGTCGCTAATGATAACCGGCAAGCCAACTAAGAAATGCTCCTGAAGAAACCCTTCCAGAGATAAGCCAGACTTCTTCGCCACAAGTTTXXXXXXXXXXTAGATTCCCTATCTTTCGCAGAAACGAACTGAACGGCGGATTCCAGGTCTCCGCGGAGCAACATTCCGCCCATGATCAAGCCCATGTCTAAAACCCGAAG
>Marker366498
TGAAAAATTGTTGATTAGGCGCTATGGCTTTAAGGGTTGTTCAGTGGTTTGTTTGCCCTTTTGATCAAATTCACTAGTTAACAGCCATGTCAATGGGCATXXXXXXXXXXCACTTACTGGCAATTTAAGGTGCTTTCTGCAGAAATTCACCTAAACTAATTCTGGTGTCTTTTAAGTTGGAGAGGTCTTGTTGGGAGTTTAGCTCATCAA
TGAAAAATTGTTGATTAGGGCGCTATGGCTTTAAGGGTTGTTCAGTGGTTTGTTTGCCCTTTTGATCAAATTCACTAGTTAACAGCCATGTCAATGGGTAXXXXXXXXXXCACTTACTGGCAATTTAAGGTGCTTTCTGCAGAAATTCACCTAAACTAATTCTGGTGTCTTTTAAGTTGGAGAGGTCTTGTTGGGAGTTTAGCTCATCAC
>Marker370644
AGCCACGAACTTTCATACACATGAAACCTGCACTGCTTGAGCTCAAGGACCTGGAATTTTAGTTCTGAAGCTGCAAGACTATCATCCATGTCTAGTAGCTXXXXXXXXXXCACTTCGCTTGAACAGTAACATGTGGATGGCAAGCGGTGGTCAACCTGATGAGTTACGCCAAATTTTTGACAAACTCGATCGAATTGACTCTAGGAGTGA
AGCCACGAACTTTCATACACATGAAACCTGCACTGCTTGAGCTCAAGGACCTGGAATTTTAGTTCTGAAGCTGCAAGACTATCATCCATGTCTAGTAGCTXXXXXXXXXXCACTTCGCTTGAACAGTAACATGTGGATGGCAAGCGGTGGTCAACCTGATGAGTTACGCCAAATTTTTGACAAACTCGATCGAATTGACCCTAGGAGTGA
>Marker370820
TATTAATGATAAATGTAAAACATCGGCTAACCTGGATCCTTTACGTGACATTTCCTTGTTGTGTAATTAACCCCATATGCAGCTTTGAGGCAAAGAAAATXXXXXXXXXXGAGGATGTTGCCTCGCCAGATGCTTCGATGATTGTTGAGAACTGTGAGTTTCTATAAAACATCTTTGTTATCTTAATATGGCGGTTACGGTTTCAGAGAT
TATTAATGATAAATGTAAAACATCGGCTAACCTGGATCCTTTACGTGACATTTCCTTGTTGTGTAATTAACCCCATATGCAGCTTTGAGGCAAAGAAAATXXXXXXXXXXGAGGATGTTGCCTCGCCAGATGCTTCGATGATTGTTGAGAACTGTGAGTTTCTATAAAACATCTTTGTTATCTTAATATGACGGTTACGGTTTCAGAGAT
>Marker375901
TCTTCTTCTTCTTCTTCCTCGCCATCCTTTTCATGTTTATCTTCACCATTCCGAACAACCAAATCAATCTCCCTGCCTTTCACATCTCTTTCTTGCACAGXXXXXXXXXXGCAAAAAACAATTAAACTCAGACCCAAACGCTCTCAGCGCATCACAAATCGTAACCGGAAGATGCACCCACCTCTGATTCCTCCCAGGCGGCAAACACTC
TCTTCTTCTTCTTCTTCCTCGCCATCCTTTTCATGTTTATCTTCACCATTCCGAACAACCAAATCAATCTCTCTGCCTTTCACATCTCTCTCTTGCACAGXXXXXXXXXXGCAAAAAACAATTAAACTCAGACCCAAACGCTCTCAGCGCATCACAAATCGTAACCGGAAGATGCACCCACCTCTGATTCCTCCCAGGCGGCAAACACTC
>Marker376637
TCAATACATATTAATCACAATTTCGACTCAGTAACTTGCATTTACTATGACTTGGTTAGGAAAAAAATCACCAATAACACATTCAATCTTTAAGAACAACXXXXXXXXXXTGCTTTGTAATAGTTCGGAAAGCACCAATCATATGTTCTCTCAATATTCATTTGTCAAACCCCAACGAAGAAACCAAACAATTTTCTATAAAGCCAACAT
TCGATACATATTAATCACAATTTCGACTCAGTAACTTGCATTTACTATGACTTGGTTAGGAAAAAAATCACCAATAACACATTCAATCTTTAAGAACAACXXXXXXXXXXTGCTTTGTAATAGTTCGGAAAGCACCAATCATATGTTCTCTCAATATTCATTTGTCAAACCCCAACGAAGAAACCAAACAATTTTCTATAAAGCCAACAT
>Marker376663
GTCAATGTCTGGCTTAGCCAATAAGTCCTTATCTGCCCTTGTCAGGTGAAACGACGACTCCACACCCTGCACTGGATTAGCACTGAAGCATACTGAACATXXXXXXXXXXTTCAAACTGAGGAAAACTTAATGAGCAGGAATTTTCCAAGAAAAGTGTATGCCACAACTCCAACCAGTATAATTACTGTGCAGGAACACCATACAAGGAA
GTCAATGTCTGGCTTAGCCAATAAGTCCTTATCTGCCCTTGTCAGGTGAAACGACTTCTCCACACCCTGCACTGGATTAGCACTGAAGCATACTGAACATXXXXXXXXXXTTCAAACTGAGGAAAACTTAATGAGCAGGAATTTTCCAAGAAAAGTGTATGCCACAACTCCAACCAGTATAATTACTGTGCAGGAACACCATACAAGGAA
>Marker376912
ATTCAACTAGGGTCCTAGCTCCCTTGGTGGGTTAATAAGGATAGCTTCATCCATGCTAGTTGATACTGTCTTAGGTTTTTTCATTTCAAGCTCGAGATTAXXXXXXXXXXAAAAGTAGAGAAGGCGAAAATAAACAAAATATTCAGTTATTTAAAAGAAACCCCACTTAAGAACTTTTATTTGTTGAAACTAACAATAAATCCACAAAAA
ATTCAACTAGGGTCCTAGCTCCCTTGGTGGGTTAATAAGGATAGCTTCATCCATGCTAGTTGATACTGTCTCAGGTTTTTTCATTTCAAGCTCGAGATTAXXXXXXXXXXAAAAGTAGAGAAGGCGAAAATAAACAAAATATTCAGTTATTTAAAAGAAACCCCACTTAAGAACTTTTATTTGTTGAAACTAACAATAAATCCACAAAAA
>Marker376992
AATCGCTCTAAGTGCAAAATCAATATCACAAATCCCACCCAGACCTAAACCTTGCAACAAGTGCAGATTAACAGGTATAGAGAAAGGAAAATGAACCCCAXXXXXXXXXXCTGCAAAAACAGAAGCATGAAGGGAAAAAAAATGAGAAGTGCTCTTAGTATCAAAATGGTCACAGACCTTCGGTTCTACTCGATCAAAAGCCATCTCAAT
AATCGCTCTAAGTGCAAAATCAATATCACAAATCCCACCCAGACCTAAACCTTGCAACAAGTGCAGATTAACAGGTATAGAGAAAGGAAAATGAACCCCAXXXXXXXXXXCTGCAGAAACAGAAGCATGAAGGAAAAAAAAATGAGAAGTGCTCTTAGTATCAAAATGGTCACAGACCTTCGGTTCTACTCGATCAAAAGCCATCTCAAT
>Marker377043
CATTAGTTGCTATTCAAAACCGGCACAAATTGAAGAAGAGAAACACCAAAAAGATCATAATTAAGTCAATAGGAAAATCCCTTATTTGGCGTCTTGAGAAXXXXXXXXXXAACGTGGAGCGGATCCAGAACAGAACCAATCGATCTCTCCGCTTCCAAATCGCAAACGCTGGATTGGGTTCTGTGGTAGCCTCCCCACCGTCAACATCCG
CATTAGTTACTATTCAAAACCGGCACAAGTTGAAGAAAAGAAACACAAAAAAAATCTTAATTAAGTCAATAGGAAAATCCCTTATTTGGCGTCTTGAGAAXXXXXXXXXXAATGTGGAGCGGATCCAGAGCAGAACCAATCGATCTCTCCGCTTTCAAATCGCAAACGCCGGATTGGGTTCTGTGGTAGCCTCCCCACCGTCAACATCCG
>Marker377059
TAAGTCTTTTTCTATATTCGTCGGCGGCAATACGCCAACGAGTTGTGTTTTTTAGTATCTGTTTCTCTCGTTCGTGCAAAATATATGATTTTCAATATCAXXXXXXXXXXTGTTTTTTAGTATCTGTTTCTCTCGTTCGTGCAAAATATATGATTTTCAATATCAGTTAGTGATTTAGTGATATTTCTGTAGTTTGACTATTTATAACGA
TAAGTCTTTTTCTATATTCGTCGGCGGCAATACGCCAACGAGTTGTGTTTTTCAGTATCTGTTTCTCTTGTTCGTGCAAAATGTATGATTTTCAATATCAXXXXXXXXXXTGTTTTTCAGTATCTGTTTCTCTTGTTCGTGCAAAATGTATGATTTTCAATATCAGTTAGTGATTTAGTGATATTTCTGTAGTTTGACTATTTATAACGA
>Marker377840
CGTTTTTTTCATCTCAAAACCAAACGACTTGTGGTGCAGGTTCTGTGGACGAAATATATTAAGGACTATGTGAATGAATTCCGGAAAAGACACACTAGTTXXXXXXXXXXTGTTGGCAGTTATGCCACATATGGTGGAGGGTTACGACTGTGCTGGTTTATGGGACGGTCGCAACACCCGATTTTGGTCGCAACATTGGCTGGATAATGG
CGTTTTTTTCATCTCAAAACCAAACGACTTGTGGTGCAGGTTCTGTGGACGAAATATATTAAGGACTATGTGAATGAATTCCGGAAAAGACACACTAGTTXXXXXXXXXXTGTTGGTAGTTATGCCACATATGGTGGAGGGTTACGACCATGCTGGTTTATGGGACGGTCGCAACATCCGATTTTGGTCGCAACATTGGCTGGATAATGG
>Marker377905
CTTACGGATATTATGAGTGCATACCAATGACTTCCAAGAGGTCGCCCATTTATATAGTGCTCCCTGTGAAACCCGCCCCTAGACATCCCGATTGAACCATXXXXXXXXXXAACATCCAAAGGTAAGCAATTAAAACAACTTAAAACATCTGAAATCCGAATACATGAAAGCATCTTAAAACATAAAAAGGGATAAGTGAGGTTCTCCAAG
CTTACGGATATTATGAGTGCATACCAATGACTTCCAAGAGGTCACCCATTTATATAGTGCTCCCTGTGAAACCCGCCCCTAGACGTCCCGATTGAACCAGXXXXXXXXXXAACATCCAAAGATAAGCAATTAAAACAACTTAAAACATCTGAAATCCGAATACATGAAAGCATCTTAAAACATGAAAAGGGATAAGTGAGGTTCTCCAAG
>Marker377940
ATCAAGAGAAGCATGAGCGCTTCCATATTCGGCGAGCCTATGATCTTCTTCACTGACCACTGAAGCGGACTAGTGAATTCAACTAGTGGATTGTTTGGCGXXXXXXXXXXTCTACCAATGTTTCCATAGATCACACTACAGTAGAAGGCGTAGAGCACTAGGTGTAACATCCCGGTCTTTTCCGACAAGCCATTATCCGTTTAGGGACTA
ATCAAGAGAAGCATGAGCGCTTCCATATTCAGTGAGCCTATGATCTTCTTCACTGACCACTGAAGCGGACTAGTGAATTCAACTAGTGGATTGTTTGGCGXXXXXXXXXXTCTACCAATGTTTCCATAGATCACACTACAGTAGAAGGCGTAGAGCACTAGGTGTAACATCCCGGTCTTTTCCGACAAGCCATTATCCGTTTTGGGACTA
>Marker379405
TATGAAGATACCATCAGGTTTCTGAGTAACCTCCACACCAAGGAAATATCTCATCTTCCCTAGATCTGTCATCTCAAATTCAAACTTCATGTCTTCCTTGXXXXXXXXXXTGCTAGTATACATCAGATCATCGACATATAGACATGTTCCTGATAGCTTTATAAACAACGTATGCTCATAATCACACCTTGCAAAACCACAATTGAGAAA
TATGAAGATACCATCAGGTTTCTGAGTAACCTCCACACCAAGGAAATATCTCATCTTCCCTAGATCTGTCATCTCAAATTCAAACTTCATGTCTTCCTTGXXXXXXXXXXTGCTAGTATACATCAGATCATCGACATATAGACATGTTCCTGATAGCTTTATGAACAACGTATGCTCATAATCACACCTTGCAAAACCACAATTGAGAAA
>Marker379704
TAGCTGTGATTTTGCATTGTGAATAGTAGTTAACTCTCGCCCATAATAATTAGTTATTTGCTTTGACTTGTGATGATTATTGAGCTCTAATGCATATCCAXXXXXXXXXXCTGGTGTAGCTTCATTATATATTTCACAAGGGCGTGAAAATTCTAAGTGTGAGGGATTAGTTTTGATATTGATTGATTGGTTAACCTTGTTGTTTGATTC
CAGCTGTGATTTTGCATTGTGAATAGTAGTTAACTCTCGCCCATAATAATTAGTTATTTGCTTTGACTTGTGATGATTATTGAGCTCTAATGCATATCCAXXXXXXXXXXCTGGTGTAGCTTCATTATATATTTCACAAGGGCGTGAAAATTCTAAGTGTGAGGGATTAGTTTTGATATTGATTGATTGGTTAACCTTGTTGTTTGATTC
>Marker383310
ACCACCTTTTGTTGGGTCTCGGTCGTCATAAAGTTGTTCAAATTTGAGATAACGTATTCAAATTTTTATCAAAAGATAAATAATTAATAGACTAACCGTAXXXXXXXXXXTAAAAGCAAGTGACGCCAACTTCATTAATCACACATTATTGTTGTTGATTTATCTTACCTTAAAATGCATTATATAACCATTAATTTTTGTGTCTACCTA
ATCACCTTTTGTTGGGTCTCGGTCGTCATAAAGTTGTTCAAATTTGAGACAACGTATTCAAATTTTTATCAGAAGATAAATAATTAATAGACTAACCGTAXXXXXXXXXXTAAAAGCAAGTGACACCAACTTCATTAATCACACATTATTGTTGTTGATTTATCTTACCTTAAAATGCATTATATAACCTTTAATTTTTGTGTCTACCTA
>Marker385731
TGGTCCGAGCATCATCACCGATGTGGTGAAGGGTTTCACATAGGAGGCGTCTGCTCCGACGACGGTGAAATTGTGGTTGGCGATTGTGAAGAACAGCGGCXXXXXXXXXXAGGAAATCAGATGATGAAAAAGGAGTTTTAAATTTCGGTTATGTTTTCTAACGGTTTGGCGGGAGAATATCAAGGAAAATTATAGGCTCTGCAGCCCATG
TGGTCCGAGCATCATCACCGATGTGGTGAAGGGTTTCACATAGGAGGCGTCTGCTCCGACGACGGTGAAATTGTGGTTGGCGATTGTGAAGAACAGCGGCXXXXXXXXXXAGGAAATCAGATGATGAAAAAGGAGTTTTAAATTTCGGTTATGTTTTCTAACGGTTTGGCGGGAGAATATCAAGGAAAATTATAGGCTCTGAAGCCCATG
>Marker385820
CCGACAAGCATTAATTTTGCCAAGGAAGTCAGAATTGAAAGCAAAGGACAAAATGAAAAGGGCGCACATTTGATTTGAACCCTAGCTAGAGCCTGACAAAXXXXXXXXXXTAGCCCGTCATGATGATAATGAGATGTTCTGTTCTGATCAAATATTTGTTTCTCATACAATACACATTCAACTCAATACAAGCAAATCATAACAATTCAT
CCGACGAGCATTAATTTTGCCAAGGAAGTCAGAATTGAAAGCAAAGGACAAAATGAAAAGGGCGCACATTTGATTTGAAACCCTAGCTAGAGCCTGACAAXXXXXXXXXXTAGCCCGTCATGATGATAATGAGATGTTCTGTTCTGATCAAATATTTGTTTCTCATACAATACACATTCAACTCAATACAAGCAAATCATAACAATTCAT
>Marker387219
CTGATTACATGGAATATTCAAATTGGAATCTTTTCAAATCTGGAAAATCATCACTCAACTAAACTGATGTTAGGCTGACCAATGTTAAACTGATTTAACAXXXXXXXXXXTTTGAATTTTTTGTCTAACAACGGTCACTTATCCGTATGCACAGAAGTGGGCAAAATCAAGGATAGATCTGCAAGTGTGGATCTTGTTTTTCACATTCAT
CTGATTACATGGAATATTCAAATTGGAATCTTTTCAAATCTGGAAAATCATCACTCAACTAAACTGATGTTAGGCTGACCAATGTTAAATTGATTTAACAXXXXXXXXXXTTTGAATTTTCTGTCTAACAACGGTCACTTATCCGTATGCACAGAAGTGGGCAAAATCAAGGATAGATCTGCAAGTATGGATCTTGTTTTTCACATTCAT
>Marker388133
GATGGCTCACGAATCTAAGGTTGAGTCTTATTTATTTATTTATTATTAATTATTATTAATGAAAGAAAGAAAGAAAGAAAGAAAGAAAGTCCAATCAATAXXXXXXXXXXTTTTTCTCAATCATATATACCAAACAGCTCCTGTTTCCATGTGGCGGCTGTTGTTATTGACTTCTCTTCCAACCAAAAGTCAATTCCAACCAGTAATTAA
GATGGCTCACGAATCTAAGGTTGAGTCTTATTTATTATTATTATTAATGAAAGAAAGAAAGAAAGAAAGAAAGAAAGTCCAATCAATATCGTATATCCAAXXXXXXXXXXTTTTTCTCAATCATATATACCAAACAGCTCCTGTTTCCATGTGGCGGCTGTTGTTATTGACTTCTCTTCCAACCAAAAGTCAATTCCAACCAGTAATTAA
>Marker390935
ACAAGCGGGATAACAAGCTCGGTCTGGGCTGATCGGCTGCATCCTCGAGCAATGGCTCTTCCTCAATCTCATCTGAGCTGTTCTTGTCCTCCTCTTCAACXXXXXXXXXXGCTTGTGAAGAGCAGCTTTCGAATCAGACTCTGATGACTTGTCCACTTTAGCCATCTAATAACAGCACAGAGAGTAAGTGAAGTTTGAGAAATTTTATTA
ACAAGCGGGATAACAAGCTCGGTCTGGGCTGATCGGCTGCATCCTCGAGCAATGGCTCTTCCTCAATCTCATCTGAGCTGTTCTTGTCCTCCTCTTCAACXXXXXXXXXXGCTTGTGAAGAGCAGCTTTCGAATCAGACTCGGATGACTTGTCCACTTTAGCCATCTAATAACAGCACAGAGAGTAAGTGAAGTTTGAGAAATTTTATTA
>Marker391018
CAAAGCTCTTGGATTTCTTTTTCAAAGGATAACAAATCTTGATGTAAGGATAACACGGATGTGTCACGACGAACGATATATTCAAGTGGCGGTAAATATTXXXXXXXXXXATCCATAAAGGGAAAGCGTCTTACACAATACATGTTATAAAATAGCATTTGAAGGATAGGTCACCCAATCAGCCGCACGATTTAGAGGTCGAAAGACAAA
CAAAGCTCTTGGATTTCTTTTTCAAAGGATAACAAATCTTGATGTAAGGATAACACGGATGTGTCACGACGAACGATATATTCAAGTGGCGGTAAATATTXXXXXXXXXXATCCATAAAGGGAAAGCGCCTTACACAATACATGTTATAAAATAGCATTTGAAGGATAGGTTACCCAATCAGCCGCACGATTTAGAGGTCGAAAGACAAA
>Marker394456
AACTCTTCGGATCAAGCTGTTGATACTCTATTTGAGGGCTACCATGCTTCTACGGATGGACAAGTCATTGAGATTCAGAAAGTTTTGGATGACTCTTGCGXXXXXXXXXXCAACGTGAGCAATTGAGCTTCTGACAGAGGAGCTCTCAAAGGTTACACCATGTAACTGTATAGTTGAGACAACTCATGAAATCCCGTGCACTTGTAGTAT
AACTCTTCGGATCAAGCTGTTGATACTCTATTTGAGGGCTACCATGCTTCTACGGATGGACAAGTCATTGAGATTCAGAAAGTTTTGGATGACTCTTGCGXXXXXXXXXXCAACGTGAGCAATTGAGCTTCTGACAGAGGAGCTCTCAAAGGTTACACCATGTAACTGTATAGTTGAGACAACTCATGAAATCTCGTGCACTTGTAGTAT
>Marker395848
CAATAACACATGAACCATGGCTACCTATTAGTAAATCCCAATAAAATTGTTCATCAAGGTCGGAGGGTCACAGGATCTTTGAACCCGTTGTTAGCCGGATXXXXXXXXXXCCCATCACAAATTCAATATATTAACAACTGAAGATAATAAAATAAACAACCCAAGATAAAAGTCAGCTAATCATGAGAAAATTATCTAATTTTAATAACG
CAATAACACATGAACCATGGCTACCTATTAGTAAAGCCCAATAAAATTGTTCATCAAGGTCGGAGGGTCACAGGATCTTTGAACCCGTTGTTAGCCGGATXXXXXXXXXXCCCATCACAAATTCAATATATTAACAACTGAAGATAATAAAATAAACAACCCAAGATAAAAGTCAGCTAATCATGAGAAAATTATCTAATTTTAATAACG
>Marker398643
CTGGAATTATTCTTTGCCTGAAACTAAGTAATTATTTCACATTTCCCCTCCTAGAGAGATGAATGATTTATCGTGCTTCGGCACTCCTAGCTACAGTGATXXXXXXXXXXCCACAGAGAAAGTGATGAAGATGATATCGACATACAAGATTTGGTGACCTCTTTCTCCGGTCTTGAAGAGAAGGTTCTCGAACAATATACTTTTGCGAAG
CTGGAATTATTCTTTGCCTGAAACTAAGTAATTATCTCACATTTCCCCTTCTAGAGAGATGAATGATTTATCGTGCTTCGGCACTCCTAGCTACAGTGATXXXXXXXXXXCCACAGAGAAAGTGATGAAGATGATATCGACATACAAGATTTGGTGACCTCTTTCTCCGGTCTTGAAGAGAAGGTCCTCGAACAATATACTTTTGCGAAG
>Marker398891
TTCAAACCTTGATAGCTTGGAAATAACCCCCAATGAGTGCTTTGCATGAAATTATGTTCCTTCTCGTAGATTTTCAGTTGCATTTAAAACCAGTAGTCATXXXXXXXXXXCTCTTTTCTGGACGGTAACTTTGAGATTTCTACCATCCTTCAGGGAGTTCGTGATGCAGCCGTGGAGTTGTTGCACACTCTGGTCTCAGTGCATGCAGAG
TTCAAACCTTAATAGCTTGGAAATAACCCCCAATGAGTGCTTTGCATGAAATTATGTTCCTTCTTGTAGATTTTCATTTGCATTTAAAACCAGTAGTCATXXXXXXXXXXCTCTTTTCTGGACGGTAACTTTGAGATTTCTACCATCCTTCAGGGAGTTCGTGATGCAGCCGTGGAGTTGTTGCACACTCTGGTCTCAGTGCATGCAGAG
>Marker398931
GACTCGTGGGAGCGAAGATGCAGCTTCTGACGACAGACAACAAGGAACAGTATCTCCAGACGACCTAATCGTAAGAAATCTCATTTCCGGTTTCATCTATXXXXXXXXXXAGCATGCTTCATCGAGTCGACTCCCTTGGACACGGTGCCTGAATCCGCCAAAGCCTTCGACTTGCGGGGCGACGCAATGGATTCTCCCCCGCAACACTAT
GACTCGTGGGAGCGAAGATGCAGCTTCTGACGACAGACAACAAGGAACAGTATCTCCAGACGACCTAATCGTAAGAAATCTCATTTCCGGTTTCATCTATXXXXXXXXXXAGCATGCTTCATCGAGTCGACTCCCTTGGACACGGTGCCTGAATCCGCCAAAGCCTTCGACTTGCGGGGCGACGCAATGGATTCTCCCCCACAACACTAT
>Marker399394
AAAAATCAAAATCCAAAGTTTCGCAACAAATTTAATAGAGGGCAAAGATTGGGGGAGGGACGTTTAAATTAGGTGGTGATGACGGGGCGCCATTATCAAGXXXXXXXXXXGTGTGAAGTGCAAGTTGACTGATGATTCTTATCTTCTTACTACTACTTATTATTACATTATTTCTGTATCTGAAAGGAGTGGTGAATGTGTAGTAATTTG
AAAAATCAAAATCCAAAGTTTCGCAACAAATTTAATAGAGGGTAAAGATTGGGGGAGGGACGTTTAAATTAGGTGGTGATGACGGGGCGCCATTATCAAGXXXXXXXXXXGTGTGAAGTGCAAGTTGACTGATGATTCTTATCTTCTTACTACTACTTATTATTACATTATTTCTGTATCTGAAAGGAGTGGTGAATGTGTAGTAATTTG
>Marker399595
TTCCATAACCTCGTATCGAACTCTGTAAGGTTCCTCTGCAACATCTTTTGGAGTTGAAACAATAAACTTCAGTCTAGAGGCATCAGATAAGCAGTAGAACXXXXXXXXXXGCACGAACAGCAGACACATGCATAAACTCCGCAAAAGTTTTCCAGGTCAGGTGATTCAGAACACGCAGCATTTGATCATAACTACCTACAGCTAAAAACT
TTCCATAACCTCGTATCGAACTCTGTAAGGTTCCTCTGCAACATCTTTTGGAGTTGAAACAATAAACTTCAGTCTAGAGGCATCAGATAAGCAGTAGAACXXXXXXXXXXGCACGAACAGCAGACACATGCATAAACTCGGCAAAAGTTTTCCAGGTCAGGTGATTCAGAACACGCAGCATTTGATCATAACTACCTACAGCTAAAAACT
>Marker401493
TGGTTCAGTTTCAGAGCTCTGCATCGTTCTCACATGGCGATGACTGATGTATTGGAGGGATGAGATATTCGATGCAGGGCATTTTGTCTGTGCTGTATGTXXXXXXXXXXGTTTGTAGCTGGAAAGGAACACATATGATGATGATAAAGAATGGTAAGTAGTTCTGGTAATTTGTGCCTTTGTGGTTGGCTTTAATTACAGCTATCAGAA
TGGTTCAGTTTCAGAGCTCTGCATCGTTCTCACATGGCGATGACTGATGTATTGGAGGGATGAGATATTCGATGCAGGGCTTTTTGTCTGTGCTGTATGTXXXXXXXXXXGTTTGTAGCTGGAAAGGAACACATATGATGATGATAAAGAATGGTAAGTAGTTCTGGTAATTTGTGCCTTTGTGGTTGGCTTTAATTACAGCTATCAGAA
>Marker405688
TCGGTCATTATTGGATCAATGTAAGATAATTTCTTATCGCAATGCTGCTAATTAATTCTGGTTATGGTTAATTATTGCTAGTTCTATATTGTAGTAAACTXXXXXXXXXXATTGACTGAAGGTGACATGTTGTTGGCAATCAATGGGGAGCCGGTTACAAGTTTTCTCGACGTTGAAAATGCTTGTAAAGCATTGGATGATGATCATCTT
TCGGTCATTATTGGATCAATGTAAGATCATTTCTTATCGCAATGATGCTAATTAATTCTGATTATGGTTAATTATTGCTAGTTCTATATTGTAGTAAACTXXXXXXXXXXATTGACTGAAGGTGACATGTTGTTGGCAATCAATGGGGAGCCGGTTACAAGTTTTCTCGACGTTGAAAATGCTTGTAAAGCATTGGATGATGATCATCTT
>Marker405730
TTGTGCATTACGCTGTCTTTGATCTTCTGTGTCGTGTCCTTCATCGTTCCCCATGCTCCTTGCACTGTCTGCTTCGCCTTCTCCGTCACGTTCTGAGCCAXXXXXXXXXXATGGCTGGAAATACGTGATAAAATTGATATTTCACAGTCATACAAGTCTGTATATTAAGTATACTATTTTAGTATAGTGTTATACTTAGTATTACACCTG
TTGTGCATTACGCTGTCTTTGATCTTCTGTGTCGTGTCCTTCATCGTTCCCCATGCTCCTTGCACTGTCTGCTTCGCCTTCTCCGTCACGTTCTGAGCCAXXXXXXXXXXATGGCTGGAAATACGGGATAAAATTGATATTTCACAGTCATACAAGTCTGTATATTAAGTATACTATTTTAGTATAGTGTTATACTTAGTATTACACCTG
>Marker405781
ATGCTTTTAAGTATTTTCCTCTACTGTTCTGGTGTGTATCTGTCATGAAACTAACTGATCTTCCGTTGTTTTGTTTCAATGGATTAGAATCAGATTCTACXXXXXXXXXXTTCTTTTTTCATTATTTTGATCGAGTTAAATAGCGCATTCAAGTTGAGTAACACGAGACAGAACGACCCTGAATTTTGCTTGTGAGCTTATTTCTTGGGT
ATGCTTTAAGTATTTTCCTCTATTGTTCTGGTGTGTATCTGTCATGAAACTAACTGATCTTCCGTTGTTTTGTTTCAATGGATTAGAATCAGATTCTACTXXXXXXXXXXTTCTTTTTTCATTATTTTGATCGAGTTAAATAGCGCATTCAAGTTGAGTAACACGAGACAGAGTGACCCTGAATTTTGCTTGTGAGCTTATTTCTTAGGT
>Marker405969
ACAATTCAGCAGCTGAAAAGAGATATTTGTTATAAGCAGCTACATGACTTGTGCAGAATCAATATCGATGAAGGAACCAGTAGCGGCGCCAACGACGGATXXXXXXXXXXTCCAGCCTGGTAATTAAGTCTTTAAACTTGTGATTCTTTCTTTCTTAATTAATCTAATTCCTTCCCGCTGGCTGAGCCAATTGGTTGGATCTCATCATCA
ACAATTCAGCAGCTGAAAAGAGATATTTGTTATAAGCAGCTACATGACTTGTGCAGAATCAATATCGATGAAGGAACCAGTAGCGGCGCCAACGACGGATXXXXXXXXXXTCCAGCCTGGTAATTAAGTCTTTAAACTTGTGATTCTTTCTTTCTTACTTAATCTAATTCCTTCCCGCTGGCTGAGCCAATTGGTTGGATCTCATCATCA
>Marker406007
TTCCACTGACGAAAGGGTATGACCTCAAAGTCGACGAAAACTACAAGCAAATGGGTAGCAATGACAACGAAAGTGCTCAGAACAGTAACATGAGACCAACXXXXXXXXXXTCAGGTCATTGCAAATAACGGTATTATATTCCCAAATCTCACCAACCATTTAGCAGCCACTTCATCTATTTAGGCATGCCCTCCTTCTCCAATAGTAACA
TTCCACTGACGAAAGGGTATGACCTCAAAGTCGACGAAAACTACAAGGAAATGGGTAGCAATGACAACGAAAGTGCTCAGAACAGTAACATGAGACCAACXXXXXXXXXXTCAGGTCATTGCAAATAACGGTATTATATTCCCAAATCTCACCAACCATTTAGCAGCCACTTCATCTATTTAGGCATGCCCTCCTTCTCCAATAGTAACA
>Marker406012
TGCAGGAAATTTATGATTCATTCATTCAGTGGTTAGCCGATTCTTTGACAGAGTGATGATTATGGGGGGCAAAAGATTGGAGATCTGTCGACGAGATTGAXXXXXXXXXXCTACGGGCATAACTCTCTGTCCCATCCATGATGATGAGGGTCTGGTCGTCTGGAGTATTATTTTATTATATTGGATGACCGGATCTTTGGTCACGGACTA
TGCAGGAAATTTATGATTCATTCATTCAGTGGTTAGCCGATTCTTTGACAGAGTGATGATTATGGGGGGGAAAAGATTGGAGATCTGTCGACGAGATTGAXXXXXXXXXXCTACGGGCATAACTCTCTGTCCCATCCATGATGATGAGGGTCTGGTCGTCTGGAGTATTATTTTATTATATTGGATGACCGGATCTTTGGTCACGGACTA
>Marker406287
TGCAGGTAATAAAGAGATCAGATAAGTTAAAATTGGAAACTTGTCAACATTGCACTTTGGCAAGCGCAGAAAAAATACACCTGAAAACTACTATTTACCAXXXXXXXXXXCAAAATTTAACTAGTTAAAAACATAACCTATTAGTTCCTTTTTAATATAAAGTTTCAAAATGTAAACAAATTTGAAAATATATCGAATTAAATTTCGTAT
TGCAGGTAATAAAGAGATCAGATAAGTTAAAATTGGAAACTTGTCAACATTGCACTTTGGCAAGCGCAGAAAAAATACACCTGAAAACTACTATTTACCAXXXXXXXXXXCGAAATTTAACTAGTTAAAAACATAACCTATTAGTTCCTTTTTAATATAAAGTTTCAAAATGTAAACAAATTTGAAAATATATCGAATTAAATTTCGTAT
>Marker406331
TATTCTACCTCCTCCGATTGCTAGTGAGAAATATCCATTTTGGGATGCATGTAATATGATGGTGTTATGCTGGATTTCTAATTCCTCATCCTGAGATCCGXXXXXXXXXXATCTGTCTGTGACTCAGTATTATACTACTACAAAGGAATATGGGAAGAATATAGTCAATTGTCTCTCATAGTGCCTTGTGTTTGTGCTCCAGGGAATGCT
TATTCTACCTCCTCCGATTGCTAGTGAGAAATATCCATTTTGGGATGCATGTAATATGATGGTGTTATGCTGGATTTCTAATTCCTTACATCCTGAGATCXXXXXXXXXXATCTGTCTGTGACTCAGTATTATACTACTACAAAGGAATATGGGAAGAATATAGTCAATTCTCTCTCATAGTGCCTTGTGTTTGTGCTCCAGGGAATGCT
>Marker407597
GTAGCTCCTTTCGATAATGCTAGACTTCAGTATAAGAGGTTTCTTTCATGTTGATTGCTTACTTATCCTATGGTTCTTACTTGTGCAGGTTGACCTAGAGXXXXXXXXXXAAGTAATTTGTCAACGACTTCTATTGTTCCCCCTTTTCTTATGTCATATCGATCCAGCCATACTTAATTTCATTTCCTTCTCCAATAACAGGTTGTTGAA
GTAGCTCCTTTCGATAATGCTAGACTTCAGTATAAGAGGTTTCTTTCATGTTGATTGCTTACTTATCCTATGGTTCTTACTTGTGCAGGTTGACCTAGAGXXXXXXXXXXAAGCAATTTGTCAACGACTTCTATTGTTCCCCCTTTTCTTATGTCATATCGATCCAGCCATACTTAATTTCATTTCCTTCTCCAATAACAGGTTGTTGAA
>Marker407688
TTGAAATTTAGATTGGAGATGAATATAGTGCACTTATCCACTGCCAGAGTCGATTTCCATCCTTTTATCTGGTTCTACAGTGCTAGTGTTTTTCATCTCCXXXXXXXXXXAATCAAACACATTCAGCCAATTCCGATTTCTGCCGTTTGAGATGCCATCGATCGGGAGAACATTCACCAACAGAAGGATCACGTTGTTAAACGTATATAT
TTGAAATTTAGATTGGAGATGAATATAGTGCACTGATCCACTGCCAGAGTCGATTTCCATCCTTTTATCTGGTTCTACAGTGCTAGTGTTTTTCATCTCCXXXXXXXXXXAATCAAACACATTCAGCCAATTCCGATTTCTGCCGTTTGAGATGCCATCGATCGGGAGAACATTCACCAACAGAAGGATCACGTTGTTGAACGTATATAT
>Marker407755
AACCCAATCAAGAAATTTCATAAGAATTCGTAACTAACATAATAATTTTTAGTTTCTATTTGAAAAAACCAATCCTTAATTCCGCCACACCCACATCGAAXXXXXXXXXXATAACCTAAAAAAAATTAAACTCTTTAATTAATTTCAACCACTTTCACCAAAAATTGCATCCCTTGGGATATACCACAAGTCCACGAAGACTTTTCTTTT
AACCCAATCAAGAAACTTCATAAGAATTCGTAACGAACATAATAATTTTTAGTTTCTATTTGAAAAAACCGACCCTTAATTCCGACACACACACATCGAGXXXXXXXXXXATAACCTAAAAAAAATTAAACTCTTTAATTAATTTCAACAACTTTCACCAAAAATTGCATCCCTTGGGATATACCACAAGTCCACGAAGACTTTTCTTTT
>Marker407821
CCATCCCCTCCATGTATGCGGCGACACTAAGATTCTGTCTCACTGCCTCCACCCATATACAACTTTTCAAACTGGTGGGTTAACCGGGTATTAACCAATTXXXXXXXXXXAATTTTACTGAGTATGATCATACGCGCTAGCTCTATTAGAACGATATTGAATCGAGAACTATAGTTACTAGTTATATAAAGTGTCACACACTCTTAATCT
CCATCCCCTCCATGTATGCGGCGACACTAAGATTCTGTCTCACTGCCTCCACCCATATACAACTTTTCAAACTGGTGGGTTAACCGGGTATTAACCAATTXXXXXXXXXXAATTTTACTGAGTATGATCATACGCGCTAGCTCTATTAGAACGAGATTGAATCGAGGACTATGGTTACTAGTTATATAAAGTGTCACACACTCTTAATCT
>Marker407885
GTATTAAGTGAGCATAAGAAACCTGAGGTGGCAAATAAAGCATACTAATTATAGTTTCTGGAAGATTAAAACCTCGTATAGTAAAATACATAGTTTGTGGXXXXXXXXXXGCCTAAGCAATGATCTCACATCCCAATACTGACAAAGATGTTACAATCATATCTACCTCCTCCTTCTCTAAGGCTACTGTATAAATCTCAGTCCTATCGT
GTATTAAGTGAGCATAAGAAACCTGAGGTGGCAAATAAAGCATATTAATTATAGTTTCTGGAAGATTAAAACCTCGTATAGTAAAATACATAGTTTGTGGXXXXXXXXXXGCCTAAGCAATGATCTCACATCCCAATACTGACAAAGATGTTACAATCATATCTACCTCCTCCTTCTCTAAGGCTACTGTATAAATCTCAGTCCTATCGT
>Marker407920
CATCATTTGCTTGCGCCTCCGGATGGTTCTAATAAAGCCGTCTATTTTGTAGCATACTTATTTTCGAATATCTCTTAAGAATTTTGTCGATAATTATCACXXXXXXXXXXTCCTCACAAAACAATCTAAGCCAAGAAATTATATAAACATATTGCATTTAATTAACTTGAAAAAAATGCCGAATAACTTGCTAAAAATTAATGAAAGTTG
CATCATTTGCTTGCGCCTCCGGATGGTTCTAATAGAGCCGTCTATTTTGTAGCATACTTATTTTCGAATATCTCTTAAGAATTTTGTCGATAATTATCACXXXXXXXXXXTCCTCACAAAACAATCTAAGCCAAGAAATTATATAAACATATTGCATTTAATTAACTTGAAAAAAATGCCGAATAACTTGCTAAAAATTAATGAAAGTTG
>Marker408607
TTTGATTCCTGCAATCTATCAACAGCCAGAGATATGTTCATATTCCATCTAACCGTATAAATATTCCAGAAACGGAATCCTTAAAAAAACAACAGATGAAXXXXXXXXXXAACAGGGCGAAAAATCGAAAAATATACAAATCTTTCTTCATTATTGTTGTCAGAAACAACCGAAGCCAAGTGGGTTCTTCGGAGTCGTCCCTGTAGCACG
TTTGATTCCTGCAATCTATCAACAGCCAGAGATATGTTCATATTCCATCTAACCGTATAAATATTCCAGAAACGGAATCCTTAAAAAAACAACAGATGAAXXXXXXXXXXAACAGGGCGAAAAATCGAAAAATATACAAATTTTTCTTCATTATTGTTGTCAGAAACAACCGAAGCCAAGTGGGTTCTTCGGAGTCGTCCCTGTAGCACG
>Marker411755
TAATTTTTGTCCTGACTTCCTAACCTCATTTTTTATTGATTCAGTCACTACAGAGGAAGAAACCTTCTTGCTAGAAGAAGAACCAATAAGCTTTGAAGAAXXXXXXXXXXTTGACAGGTTCAAAGCGAGACTATTTTGCTACTTATTCTCCAGTTCCAAAGATAACCATTGTTCAAACTTTTTTGTGTGGCTTCAATCTATGGCATGCAG
TAATTTTTGTCCTGACTTCCTAACCTCATTTTTTATTGATTCAGTCACTACAGAGGAAGAAACCTTCTTGCTAGAAGAAGAACCAATAAGCTTTGAAGAAXXXXXXXXXXTTGACAGGTTCAAAGCGAAACTATTTTGCTACTTATTCTCCAGTTCCAAAGATAACCATTATTCAAACTTTTTTGTGTGGCTTCAATCTATGACATGCAG
>Marker411759
TTCGTTCTTATGTAACATATTTAATTTTTTCCGTTATGCAAGCCTTACGTAACGACCTTCACTATTACGTAACATGCTTAATAGTGCCCGTTACATAAGGXXXXXXXXXXCGTGACGTAAGAAACAACTTTCGTTACGTAAGCCTTGCGTAACAACCTTCATTCTTACGTAACAGGCTTACTTTTTCCCGTTACATAAGCCTTATGTAAC
TTCGTTCTTATGTAACATATTTAATTTTTTCCGTTATGCAAGCCTTACGTAACGACCTTCACTATTACGTAACATGCTTAATAGTGCCCGTTACATAAGGXXXXXXXXXXCGTGACGTAAGAAACAACTTTCGTTACGTAAGCCTTGCGTAACAACCTTCATTCTTACGTAACAGGCTTACTTTTTCCCGTTACGTAAGCCTTATGTAAC
>Marker412321
TGCAAAAAACCAAGCTATGGGAGGAACACATAGAATTGAGACTCATCATCATGTTCATTGTTCCAATTTGTTTCTAGACCAAAAACAAAAGATTTGTGTGXXXXXXXXXXAGGTGAACCGGGGTGGGCTATTATTTCTGCGAATAGTGGCTGAGGTGGTAGTTTTCTCTGGTTTTTAGTCTGGAAATTCCAGGTTCAAATTTTGAGAAGT
TGCAAAAAACCAAGCTATGGGAGGAACACATAGAATTGAGACTCATCATCATGTTCATTGTTCCAATTTGTTTCTAGACCAAAAACAAAAGATTTGTGTGXXXXXXXXXXAGGTGAACCGGGGTGGGCTATTATTTCTGCGAATAGTGGCTGAGGTGGTAGTTTTCTCTGGTTTTTAATCTGGAAATTCCAGGTTCAAATCTTGAGGAAT
>Marker413158
TCACAAGGGGCGACATCGCAAAGGAGTAATGACTACTTTAGCCCTACTGTGTCGTCGATTATGAAGAACAGAAGTGGTGTCGAGCAGCAGCCACCAGTCAXXXXXXXXXXTCATCCAAATGATGCTGGTTTGAAAGTCCAATTCCATTGTTAAGTCACAGCTTTTGTAACTACATAGTTGCATCTTTTTGTTTGTGCAGTTCAAAAATCT
TCACAAGGGGCGACATCGCAAAGGAGTAATGACTACTTTAGCCCTACTGTGTCGTCGATTATGAAGAACAGAAGTGGTGTCGAGCAGCAGCCACCAGTCAXXXXXXXXXXTCATCCAAATGATGCTGGTTTGAAAGTCCAATTCCATTGTTAAGTCATAGCTTTTGTAACTACATAGTTGCATCTTTTTGTTTGTGCAGTTCAAAAATCT
>Marker416688
TTTCAATTGGCTACTGGGAGTAATTAAAACTGTCTGTTGAATGTGTATGTTCCATATGTGTGTTTTTGGCATGTATCTGTTAAGTGGCGTAGGTATCGTCXXXXXXXXXXAGTGGCATGCATTTATCTGTAAAGTTGAGGAAGATAATAATATAACCTTGATAGAGAAAAAAAAGAGGGAATTCTGGCATGAGATTAAACCTGTGGAAAT
TTTCAATTGGCTACTGGGAGTAATTAAAACTGTCTGTTGAATGTGTATGTTCCATATGTGTGTTTTTGGCATGTATCTGTTAAGTGGCGTAGGTATCGTCXXXXXXXXXXAGTGGCATGCATTTATCTGTAAAGTTGAGGAAGATAATAATATAACCTTGATAGAGAAAAAAGAGAGGGAATTCTGGCATGAGATTAAACCTGTGGAAGT
>Marker417118
CATTAGCCTTTGTAATGTTTCTTACAAAGTGATCACCAAATGCCCGACGAACATATTGAAAACCTTCATGTTGCGTCTTGTGCAACCTATCCAAACTAGCXXXXXXXXXXTCTTGAGGATTTCATAGCTTTGGTTATGAAGTGTAGCGAGACACCCATATTCCAAGTGTTGTGCAATGGAAAGCTCTCTGATAGCTTTCACCCAACACGA
CATTAGCCTATGTAATGTTCTTACAAAGTGATCACCAAATGCCCGACGAACAGATTGAAAACCTTCATGTTGCGTCTTGTGCAACCTATCCAAACTAGCTXXXXXXXXXXTCTTGAGGATTTCATAGCTTTGGTTATGAAGTGTAGCGAGACACCCATATTCCAAGTGTTGTGCAATGGAAAGCTCTCTGATAGCTTTCACCCGACACGA
>Marker417253
TTGATGTCTCAGAGAACAGAATGATTGTTAATGATGGTTAGGTGTGTTACATCTAAGGTTTTCAACACAAAAAAAGGATAAAAGGATTCATAGGAAAGTTXXXXXXXXXXGTTTCTCTTTTTCGTTCCTAACATAACACGAAAAAGTGATAGTCGGGAGATGGTTTTTGTCAATATAAAAAGTAAAAGACTTTATTAGTCAAAAATGAAG
TTGATGTCTCAGAGAACAGAATGATTGTTAATGATGGTTAGGTGCGTTACATCTAAGGTTTTCAACACAAAAAAGGATAAAAGGGATTCATAGGAAAGTTXXXXXXXXXXGTTTCTCTTTTTCGTTCCTAACATAACACAAAAAAGTGATAGTCGGGAGATGGTTTTTGTCAATATAAAAAGTAAAAGACTTTATTAGTCAAAAATGAAG
>Marker417272
GCTACTTGGGCGTCCCATTTCTTAATGGGAGAGTGACAAAGAACACATATCAGAATGTCTTGGATCGTATGGAAAAGAAGCTCTCGGGATGGAAAGTTCAXXXXXXXXXXCGACAAATGGATTCGTCATTTCATATGGGGTTCTACCCCTGAGGCTAGGCGAGTCCATTTGGTCTCTTGGGAGTCTATTTGAGCTCCTAAGCGTGAAGGA
GCTACTTGGGCGTCCCATTTCTTAATGGGAGAGTGACAAAGAACACATATCAGAATCTCTTGGATCGTATGGAAAAGAAGCTCTTGGGATGGAAAGTTCAXXXXXXXXXXCGACAAATGGATTCGTCATTCCATATGGGGTTCTACCCCTGAGGCTAGGCGAGTCCATTTGGTCTATTGGGAGTCTATTTGAGCTCCTAAGCGTGAAGGA
>Marker417378
GCCTCCTGACAAACTCAGAACGGTGCCGGCGCCATCTTGCGCCCTCATGTATGCGTGCTCGTTGTCCTAACTCAGAGGAGACAAGCCTGCATATATTGCGXXXXXXXXXXGAGTGAACTCTTTTCAGCAGCTTAGCACCACTCCCAAGCTATTGTCACGGAAGATATGCAGTTGGATGTCAGCTACTAAGGACGCCTATATAAGAGACTT
GCCTCCTGACAAACTCAGAACGGTGCCGGCGCCATCTTGCGCCCTCATGTATGCGTGCTCGTTGTCCTAACTCGGAGGAAACAAGCCTGCATATATTGCGXXXXXXXXXXGAGTGAACTCTTTTCAGCAGCTTAGCACCACTCCCAAGCTATTGTCATGGAAGATATGCAGTTGGATGTCAGCTATTGAGGACGCCTATATAAGAGACTT
>Marker417506
AGGACGAGCCAACGATATGTTATTTCCGTTGACAAATCGAATGTGTATGTGTTTGGGAGGATATGGATACACTCTAGTGGTTAGGTGTTGAGTCATTTGTXXXXXXXXXXTATCACCATATTTTGAGTTCTTTGTAGAGTGTGATTAGCAGATTTTCTTGAAGACAAGCAAACGTTTAAGTTTGGGGGGATTTGATGAGCTCGATTATTA
AGGACGAGCCAACGATATGTTATTTCCGTTGACAAATCGAAGGTGTATGTGTTTGGGAGGATATGGATACACTCTGGTGGTTAGGTGTTGAGTCATTTGTXXXXXXXXXXTATCACCATATTTTGAGTTCTTTGTAGAGTGTGATTAGTAGATTTTCTTGAAGACAAGCAAACGTTTAAGTTTGGGGGGATTTGATGAGCTCGATTATTA
>Marker417682
CAGTTTTCCAGCAAGCTTAGCTCAAAGCCTTGTAGCTGTATGGATTTTCAGTAGCATTCATTCAACACGGCATAATTTTTTCATACCCGAGTTCTATCCAXXXXXXXXXXGCTGATGAAGTTGATTGACTAAAGTTTGATAATTCCTTCTTCTTCTACCGTTTCGTATTCTTCTTAGATTGTCGTTGCTGCTTCTCTGCATTTCAAAAAG
CAGTTTTCCAGCAAGCTTAGCTCAAAGCCTTGTAGCCATATGGATTTTCAGTAGCATTCATTCAACACGGCATAATTTTTTCATACCCGAGTTCTATCCAXXXXXXXXXXGCTGATGAAGTTGATTGACTAAAGTTTGATAATTCCTTCTTCTTCTACCGTTTCGTATTCTTCTTAGATTGTCGTTGCTGCTTCTCTGCATTTCAAAAAG
>Marker417967
CTGAAGATGGTGGTGGGGAAGAGATTCGGGAGGGGAGATTACGCTGAGGGGAAGAGCGAGGTGCGGAGGTATAAGGAGGCTGTGGAAGAAGCTGAGCGGCXXXXXXXXXXGAGGAACACAACAGGATTTCCTGGATGTCATGATCTCTAGCCTTGGGAATGATTCGGATGTTGCTTCTTTCTCTGCCCATTCCAGAGACACAATTATCAA
CTGAAGATGGTGGTGGGGAAGAGATTCGGGAGGGGAGATTACGCTGAGGGGAAGAGCGAGGTGCGGAGGTATAAGGAGGCTGTGGAAGAAGCTGAGCGGCXXXXXXXXXXGAGGAACACAACAGGATTTCCTGGATGTCATGATCTCTAGCCTTGGCAGTGATTCGGATGTTGCTTCTTTCTCTACCCATTCTAGAGACACAATTATCAA
>Marker419909
TTAGACCTCTCCTCGTACGACTGTGCGAAGAATCTGCCTCCGACATCGATCATTTCGCTTATCACCCTGTCTGGAATCCCATGGTTCACCACCTACACAGXXXXXXXXXXGCTGGGCAAAGTCAATAACAGGAAGCTTGACATTACTCTGCTTCACACCAGGGTTAATTAATTTCCTGTCGTTTATCGGTCGTTCTTGGGCGGGCAATAT
TTAGACCTCTCCTCGTACGACTGTGCGAAGAATCTGCCTCCGACATCGATCATTTCGCTTATCACCCTGTCTGGAATCCCATGGTTCACCACCTACACAGXXXXXXXXXXGCTGGGCAAAGTCAATAACAGGAAGCTTGACATTACTCTGCTTCACACCAGGGTTAATTAATTTCGTGTCGTTTATCGGTCGTTCTTGGGCGGGCAATAT
>Marker420034
AAACCAATTCCATTGCAAGTCTCCACATCTCCAAAGGGAGAGCCTTTCTCTTGGCAAACTGCCGGGATAACGATTAGAAGCATGTTCCCCAGGTTTCCTGXXXXXXXXXXACCCGAGTAGCGATCCGACAATGAATGAGAAGAGAATATTGAGTGGCATGAACCACCTATACATAAACATAGCAAGGTTACTTGGAATGGAAAATCTTCA
AAACCAATTCCATTGCAAGTCTCCACATCTCCAAAGGGAGAGCCTTTCTCTTGGCAAACTGCCGGGATAAAGATTAGAAGCATGTTCCCCAGGTTTCCTGXXXXXXXXXXACCCGAGTAGCGATCCGACAATGAATGAGAAGAGAATATTGAGTGGCATGAACCACCTATACATAAACATAGCAAGGTTACTTGGAATGGAAAATCTTCA
>Marker422009
TCTACTGAGATGATACAACTACAAAATTTTGTCATGCTTATCTACACGACTCAGTCGCAGTTGTTCCAATGGAGAGGGCAACATTAAGCTTAATGTTCATXXXXXXXXXXATATTGTTTTCCTGGTTTTATTATATGTATTGGAGTTGTTGGTGGAGAACGAGCTGATTGGAGTTTTGATATCAATAGATATCGTTTTGATGTGTTTTCA
TCTACTGAGATGATACAACTACAAAATTTTGTCATGCTTATCTACACGACTCAGTCGCAGTTGTTCCAATGGAGAGGGCAACATTAAGCTTAATGTTCATXXXXXXXXXXATATTGTTTTCCTGGTTTTATTATATGTATTGGAGTTGTTGGTGGAGAACGAGTTGATTGGAGTTTTGATATCAATAGATATCGTTTTGATGTGTTTTCA
>Marker422177
AAAGACTCGACTCAACCGAGCAACAGCCCTGAACCTAATCCTCTCATTCAGATCCCTCACTCTCTGCATATCCACTTTCCTCTTCGTCCTCTTCTACTTCXXXXXXXXXXTCAGAAAGGGTGAGACTTTCGACTGCGTTTACTACCCTTTCCCCAATGCAGACCAACTCCTCGACGAAATGCTCGTGAGACCATCGATTTCCAGCGACGA
AAAGACTCGACTCAACCGAGCAACAGCCCTGAACCTAATCCTCTCATTCAGATCCCTCACTCTCTGCATATCCACTTTCCTCTTCGTCCTCTTCTACTTCXXXXXXXXXXTCAGAAAGGGTGAGACTTTCGACTGCGTTTACTGCCCTTTCCCCAATGCAGACCAACTCCTCGACGAAATACTCGTGAGACCATCGATTTCCAGCGACGA
>Marker422437
TTTTCAACTCATGGCTTTGTGAAATGTCCTTATGAACATACTTTGTTTATCAAGAAAGCTGAAAACAGTATATTATTGGTGAGTTTATATGTTGATGACGXXXXXXXXXXTTGTCAAAAATCCTATAGTTCCAGGAGTTAAGCTAACAAAGGCTGGTGATGGAAGCTTGGTTAATGCCACTGAGTATAAACAATTGATTGAAAGTTTGTT
TTTTCAACTCATGGCTTTGTGAAATGTCCTTATGAACATACTTTGTTTATCAAGAAAGCTGAAAACAGTATATTATTGGTGAGTTTCTATGTTGATGACGXXXXXXXXXXTTGTCAAAAATCCTATAGTTCCAGGAGTTGAGCTAACAAAGGCTGGTGATGGAAGCTTGGTTAATGCCACTGAGTATAAACAATTGATTGAAAGTTTGTT
>Marker426440
AAAAGCAGATTTCCAGCAGAGTGAAAAAAAAATAGGGAAACATATTTGTCAGCAACAAATCCTACCCAATCGGTTAAAATAGGAAGATCAGTGATGGGAAXXXXXXXXXXAAATCCAGGACCCAGAACCAAAAGCCCTAACCCCTAACAAAGATCACAAAGAAAAGATTAGATAGAGATTTACATTACAGCCACGCTCGTTGAGATCTCG
AAAAGCAGATTTCCAGCAGAGTGAAAAAAAATAGGGAAACATATTTGTCAGCAACAAATCCTACCCAATCGGTTAAAATAGGAAGATCAGTGATGGGAAAXXXXXXXXXXAAATCCAGGACCCAGAACCAAAAGCCCTAACCCCTAACAAAGATCACAAAGAAAAGATTAGATAGAGATTTACATTACAGCCACGCTCGTTGAGATCTCG
>Marker426466
CGAATACTCCCACTTATTCAAATCGATATGAGCCGCTCAATTTTTAAAAGCAATCTTGATGGTTAATAATTAATTGATATCTTAATTCAAATAAATAAACXXXXXXXXXXTGACACAAAAACTAATTGATATTGGATAAAACCTAATGGACTTCATATCAACTTTCTGTCGTTTGGTTTGCCTGCTGTAGCTGTTCGTATCTCTAGGACG
CGAATACTCCCACTTATTTAAATCGATATGAGCCGCTCAATTTTTAAAAGCAATCTTGACGGTTAATAATTAATTGATATCTTAATTCAAATAAATAAACXXXXXXXXXXTGACACAAAAACTAATTGATATTGGATAAAACCTAATGGACTTCATATCAACTTTCTGTCGTTTGGTTTGCCTGCTGTAGCTGTTCGTATCTCTAGGGCG
>Marker426477
TTATCTCCTGCTTCATATATAAAGCCTTGAGCCTCAAGTGAATCAAACCTCATGAGAACATTAACATTCTTCATCTCCTTTATCTTCCTCTACTTGGACAXXXXXXXXXXACTCTTATTATATTAGAATATTAGATCAAAATTTAAAAACTAATCGACTAAAAAAGGGCATCCGCAATATATATATGGTGAACTCTTTGATGCATCCGAT
TTATCTCCTCCCTCATATATAAAGCCTTGAGCCTCAAGTGAATCAAACCTCATGAGAACATTAACATTCTTCATCTCCTTTATCTTCCTCTACTTGGACAXXXXXXXXXXACTCCTATTATATTAGAATATTAGATCAAAATTTAAAGACTAATCGACTCAAAAAGGGCATCCGCAATATATATATGGTGAACTCTTTGATGCATCCGAT
>Marker426483
TGCTTTTTCTTAGGAGTGTTCTTCATTTGGTTCGAGTTATGTTGGTGGGGAGTGCATGTTATTTGTCGGGTTAGTGGGGGTTATGTGTTTCTCCGTTTTCXXXXXXXXXXTTCTTAGGAGTGTTCTTCATTTGGTTCGAGTTATGTTGGTGGGGAGTGCATGTTATTTGTCGGGTTAGTGGGGGTTATGTGTTTCTCCGTTTTCGGTTGA
TGCTTTTTCTTAGGAGTGTTCTTCATTTGGTTCGAGTTATGTTGGTGGGGAGTGCATGTTATTTGTTGGGTTAGTGGGGGTTATGTGTTTCTCCGTTTTTXXXXXXXXXXTTCTTAGGAGTGTTCTTCATTTGGTTCGAGTTATGTTGGTGGGGAGTGCATGTTATTTGTTGGGTTAGTGGGGGTTATGTGTTTCTCCGTTTTTGGTTGA
>Marker427205
CTATTTCTTCCCCCGATTTGTCCATTATTCCTGTTTTTGGAAGCACAGGGTTGACTTCTAAATCCATTCCCGTCCGCAAGAAGTCGGTGCTGAGTCATCGXXXXXXXXXXCTTCCCCCGATTTGTCCATTATTCCTGTTTTTGGAAGCACAGGGTTGACTTCTAAATCCATTCCCGTCCGCAAGAAGTCGGTGCTGAGTCATCGGCTCAA
CTATTTCTTCCCCCGATTTGTCCATTATTCCTGTTTTTGGAAGCACAGGGTTGACTTCTAAATCCATTCCCGTCCGCAAGATGTCGGTGCTGAGTCATCGXXXXXXXXXXCTTCCCCCGATTTGTCCATTATTCCTGTTTTTGGAAGCACAGGGTTGACTTCTAAATCCATTCCCGTCCGCAAGATGTCGGTGCTGAGTCATCGGCTCAA
>Marker427207
CTCTCTCTGCGACTCCCTGAGCCACTCGGTCGAGGTGTCGAGGCTTCACGTGTCGAAGTTGCACATACATAGAAGAGAGGAAATGCAGCCAGTGGTAAGCXXXXXXXXXXATACTCTACATGTCCTGAGCGTGTTACATGAGTTTCCTAGGGGATTGCAAAATCATGGGGTGGGTGACTGACGCAACATAATCGTTATCTAGTATAGTAA
CTCTCTCTGCGACTCCCTGAGCCACTCGGTCGAGGTGTCGAGGCTTCACGTGTCGAAGTTGCACATACATAGAAGAGAGGCAATGCAGTCAGTGGTAAGCXXXXXXXXXXATACTCTACATGTCCTGAGCGTGTTACATGAGTTTCCTAGGGGATTTCAAAATCATGGGGTGGGTGACTGACGCAACATAATTGTTATCTAGTATAGTAA
>Marker427364
AACACTTTTCCATGCCCACGGTGGACCCTCACTACGATCATGGTCAACCTCCCGTCACTCCTGTGACCGACTTACCGTCACCCCCGTGATCGACTTTCCAXXXXXXXXXXAAACATTTCCCTACTAATGGCTATACCGAAGAGTTCTACTTTATCAGACTCCTAGAGTCTAATCCCTATTTTTTTCTTATCACTACCCCTCGTCTTACCG
AACACCTTTCCATGCCCACGGTGGACCTTCACCACAATCGTGGTCAACCTCCCGTCACTCCTGTGACCGACTTACCGTCACCCCCGTGATCAACTTTCCAXXXXXXXXXXAAACATTTCCCTACTAATGGCTATACCGAAGAGTTCTACTTTATCAGACTCCTAGAGTCTAATCCCTATTTTTTTCTTATCACTACCCCTCGTCTTACCG
>Marker427389
ATCAACCTCGCATGGGAAATCGAACAGCTAAAAATTTCCAACGGGCAGGATTGTTGGAGCTCATCACACTTTCTGTTGCCATTATGATATTTCCTCTCCAXXXXXXXXXXCAACAGAATATGCACGATAAAAAGTATATTGTTTACACCTTGGGAGGTGTTAAGTTCAGAGAAACGTTGGACGAGTTTGCTAAGTCTCTCAGGTTCCATG
ATCAACCTCGCATGGGAAATCGAACAGCTAAAAATTTCCAACGGGCAGGATTGTTGGAGCTCATCACACTTTCTGTTGCCGTTATGATATTTCCTCTCCAXXXXXXXXXXCAACAGAATATGCACGATAAAAAGTATATTGTTTACACCTTGGGAGGTGTTAAGTTCAGAGAAACGTTGGACGAGTTTGCTAAGTCTCTCAGGTTCCATG
>Marker427421
TATTGATCCACCACCTGTTGCTTTATCGACAGAGAGTAGTGACGATTTGGCATCTCATGATAGATGGCTCCTTGATTTTAGTGGTGACTTCCACAATGATXXXXXXXXXXTTATGCATTGCCTTTCATTAGATTTGGGAAAGGCTTGTAGGAAGCCTTGATGAGAACGAGCGAAGAACAACCTTATGTCCTTCTGGACTTCACCCTGACG
TATTGATCCTCCACCTGTTGCTTTATCGACAGAGAGTAGTGACGATTTGGCATCTCATGATAGATGGCTCCTTGATTTTAGTGGTGACTTCCACAATGATXXXXXXXXXXTTATGCATTGCCTTTCATTAGATTTGGGAAAGGCTTGTAGGAAGCCTTGATGAGAACGAGCGAAGAACAACCTTATGTCCTTCTGGACTTCACCCTGACG
>Marker427458
GCATCCAGGGACCTCAGATTTCCATTCTTCCGCCCGTGATTTATCGGCTCCTGGCTCGCTGATTGATGTCGTTATTGGGGAAGCTGGGTCGATGGATTGTXXXXXXXXXXTGTAAAGGTGCAGCTCATAAATCCTTTTTGGCTTGTTTTAAGTTTTATATCAACCAGAATAGTTGTGATATGGTTGTCATTGTGGAACCGAAAGTTAGTG
GCATCCAGGGACCTCAGATTTCCATTCTTCCGCTCGTGATTTATCGGCTCCTGGCTCGCTGATTGATGTCGTTATTGGGGAAGCTGGGTCGATGGATTGTXXXXXXXXXXTGTAAAGGTGCAGCTCATAAATCCTTTTTGGCTTGTTTTAAGTTTTATATCAACCAGAATAGTTGTGATATGGTTGTCATTGTGGAACCGAAAGTTAGTG
>Marker427494
TAGGGGGTTCTTTTCTCCCCAAGGCGCTTTCTTCTATCACTGATATGCTTATTGTGTGGAATAAAAAACGTGTTTGAAAATATATTTCGCTGGAAAGCTAXXXXXXXXXXGGTTTCGCGCCTTAAAAATGCTAGGATGTGGTTGGTCAGGACTTTGTCACATTTTTAATGGTATGCTTTCAATATCCGGATTGTGTGGGCTCTGTCAATA
TAGGGGTTCTTTTCTCCCCAAGGCGCTTTCTTCTATCACTGATATGCTTATTGTGTGGAATAAAAAACGTGTTTGAAAATATATTTCGCTGGAAAGCTAGXXXXXXXXXXGGTTTCACGCCTTAAAAATGCTAGGATGTGGTTGGTCAGGACTTTGTCACATTTTTAATGGTATGCTTTCAATATCCGGATTGTGTGGGCTCTGTCAATA
>Marker427503
CAAGGTTGATGGTATTGTCTAGAAAATGGGGTTTGCTTTATCTTTCAAATGCGACACGGTTGGCTTTGTTGATGGTATCCGGCTCTCAGGTTTTGGTTAAXXXXXXXXXXTTTCAACCTCGCGCTCAATAAATCCTTTATCCATTTGGTGGATGGATGTGGTCTGGTTGACATCCCGTTTCTGGTCCCCTATTCACCTGAGCTAGGAATA
CAAGGTTGATGATATTGTCTAGAAAATGGGGTTTGCTTTATCTTTCAAATGCGACACGGTTGGCTTTGTTGATGGTATCCGGCTCTTAGGTTTTGGTTAAXXXXXXXXXXTTTCAACCTCGCGCTCAATAAATCCTTTATCCATTTGGTGGATGGATGTGGTCTGCTTGACATCCCGTTTCTGGTCCCCTATTCACCTGAGCTAGGAATA
>Marker427849
TCACTGCGATTGAACCAGATACATCCCACACTCTCTAATATGGTGCTCTGCAAAAGTCCTGCACATAGTAATGACAACACCGATCATTTCAAGTAACTCGXXXXXXXXXXTATATCAACGTAGGAATTTTAAACCATCCTATAGTCCATAAAGGAAGTGCAAGCTGAATGCTTCATAAGCATTGATGGATTGTTAACAGAAACCTGTTTT
TCACTACGATTGAACCAGATACATCCCACACTCTCTAATATGGTGCTCTGCAAAAGTCCTGCACATAGTAATGACAACACCGATCATTTCAAGTAACTCGXXXXXXXXXXTATATCAACGTAGGAATTTTAAACCATCCTATAGTCCATAAAGGAAGTGCAAGCTGAATGCTTCATAAGCATTGATGGATTGTTAACAGAAACCTGTTTT
>Marker428195
ATGGAATTCCATTCTCTGATCAGATTGTAATCCGATAGCAACGAAGTCCACTTCGCCCGGGACTGATACAGATTCCGGCGAACCCCCATTGCAGCGCATTXXXXXXXXXXAGGTCCAAATCCATAACAAGTTGTTAAATGCTTAAATGCTTTAGTTCGCAGATTGAATAAATAAGAAGCTTCTAATATTAAATGTAATGAACTCAACCAT
ATGGAATTCCATTCTCTGATCAGATTGTAATCCGATAGCAACGAAGTCCACTTCGCCCGGGACTGATACAGATTCCGGCGAACCCCATTGCAGCGCATTTXXXXXXXXXXAGGTCCAAATCCATAACAAGTTGTTAAATGCTTAAATGCTTTAGTTCGCAGATTGAATAAATAAGAAGCTTCTAATATTAAATGTAATGAACTCAACCAT
>Marker428481
ATGAAGTGATTAATCCGTGTGGTTATCGCATATTTCTTATCCTTTCGAGTTAGAAGGTCACTCAGTTGATGATTAATCATACGATATATGTTATGAAGCTXXXXXXXXXXCTTTCAGTTATAACTTAAGTCACCTCCATTGTAAAATTCATTTAATATTTTGGTTCAACCTTTAAACCTTAAACTTGTTAGTAGATCGATTCAACATTCG
ATGAAGTGATTAATCCGTGTGGTTATCGCATATTTCTTATCCTTTCGAGTTAGAAGATCACTCAGTTGATGATTAATCATACGATATATGTTATGAAGCTXXXXXXXXXXCTTTCGGTTATAACTTAAGTCACCTCCATTGTAAAATTCATTTAATATTTTGGTTCAACCTTTAAACCTTAAACTTGTTAGTAGATCGATTCAACATTCG
>Marker432091
CTGAAATCTATAAAAAAACACTCCAAAACGACATCAAATTGACTCTGACCAGGTCCGAGACAGTAAATCGAGATAAAATCTGAAAGTCCATAAAACATCTXXXXXXXXXXAAACTACTAACATGGCAAAGCAAACCCATATTGCTTAATACACCTGTGAATTTCTTAACATACAAGTGAACCTCTAAGAAAAACCGAAATAGAAAGTAAA
CTGAAATCTATAAAAAAACACTCCAAAACGACATCAAATTGACTCCGACCAGGTCCGACACAGTAAATCGAGATAAAATCTGAAAGTCCATAAAACATCTXXXXXXXXXXAAACTACTAACATGGCAAAGCAAACCCATATTGCTTAATACACCTGTGAATTTCTTAACATACAAGTGAACCTCTAAGAAAAACCGAAATAGAAAGTAAA
>Marker432349
AGTACGCCACTAGGCTAGTTCATGACTATGATGCATCAGTCACCCACCCCCGGATTGTGCAATCCCCCAGGTGATATTCATGTTTCAGGCAGGACATGTAXXXXXXXXXXAGTCTTAGTTTCACACAAGTCTAGATAGCCACTCAGTGCTTATCACCGAGACCCCATTATATTTTTGTTTCCCTATCGTATCTGTGTATTTCAGTCACAT
AGTACGCCACTAGGCTAGTTCATGACTATGATGCATCAGTCACCCACCCCCGGATTGTGCAATCCCCCAGGTGATATTCATGTTTCAGGAAGGACATGTAXXXXXXXXXXAGTCTTAGTTTCACACAAGTCTAGATAGCCACTCAGTGCTTATCACCGAGACCCCATTATATTTTTGTTTCCCTATCGTATCTGTGTATTTCAGTCACAT
>Marker434107
TATTTACCACAGAACAGAACACGCTATACCTGCCGAGAGTCCAGGAGGGACAAAGTAAATATAATAATAACAAAGAAGAATGTTTATCAGATATATATTAXXXXXXXXXXTCTCTGAAATCAATTCCCAAAATCGCCTACCCACAGTTGCCGAAGCCCCGCCTACCTGCCGTCAGCCCACCCGCCGCCTGCCGCGTCGCAGCCCATACAG
TATTTACCACAGAACAGAACACGCTATACCTGCCGAGAGTCCAGGAGGGACAAAGTAAATATAATAATAACAAAGGAGAATGTTTATCAGATATATATTAXXXXXXXXXXTCTCTGAAATCAATTCCCAAAATCGCCTACCCACAGTTGCCGAAGCCCCGCCTACCTGCCGTCAGCCCACCCGCCGCCTGCCGCGTCGCAGCCCATACAG
>Marker434147
ATATTATTATAGGTTTTTATAAGTTTTTAAGATCTAATAGTTCATCAAGTTAAATGACTTCATATTATTGTAAGTCTTTTTAATGTTTTTTCAAATCCATXXXXXXXXXXCATTAACGGCAGAGGTAAGTTTTCACTTTTAACTCATATTGTATATCAATGGTGGCATTTAATTAAATACTCTCCATCATGGATTCTTCATCCAATCATG
ATATTATTATAGGTTTTTATAGGTTTTTAAGATCTAATAGTTCATCAAGTTAAAATGACTTCATATTATTGTAAGTCTTTTTAATGTTTTTTCAAATCCAXXXXXXXXXXCATTAACGACAGAGGTAAGTTTTCACTTTTAACTCATACTGTATATCAATGGTGGCATTTAATAAAATACTCTCCATCATTGATTCTTCATCCAATCATG
>Marker434589
AATCATTGGGACCAAAAAGCTTCGAAGTAGCACCAACAGCTCGTCCAGGTTCAGGACCACCTCGACCCCTACCACGACCAGCTGCCCCTCCACCACCGCCXXXXXXXXXXTGTATTCGGACACAACCAATCTCCATCTTGTTGCCACACTTTCCCCGAAGCATCACCACCCCTTCCTCTACCTCTTCCACCACCACCATTGACATCCCCA
AATCATTGGGACCAAAAAGCTTCGAAGTAGCACCAACAGCTCGTCCAGGTTCAGGACCACCTCGACCCCTACCACGACCAGCTGCCCCTCCACCACCGCCXXXXXXXXXXTGTATTCGGACACAACCAATCTCCATCTTGTTGCCACGCTTTCCCCGAAGCATCACCACCCCTTCCTCTACCTCTTCCACCACCACCATTGACATCCCCA
>Marker434603
TCCTGCAGCCAAAGGGAGAGTGTCATTGGTGTGGAAACAGGGGGGAGAAGAAGATGAGGACGAGGTGGAGAAGAGGATGGTGAGGATGCAGAAGAGGGTTXXXXXXXXXXGGTATAAAGTTCGCTCGGTTTGTTTCGATTACATTGTTAAGTGCTCGTCGCTCCCCGGTTTAAGACTCGAGGAGGATTTGTGTAGATAACCAAAAGAAAT
TCCTGCAGCCAAAGGGAGAGTGTCGTTGGTGTGGAAACAGGGGGGAGAAGAAGATGAGGACGAGGTGGAGAAGAGGATGGTGAGGATGCAGAAGAGGGTTXXXXXXXXXXGGTATAAAGTTCGCTCGGTTTGTTTCGATTACATTGTTAAGTGCTCGTCGCTCCCCGGTTTAAGACTCGAGGAGGATTTGTGTAGATAACCAAAAGAAAT
>Marker434656
CTTCCTCCACCCCACCAAAATCAACAGCCGGATTCGTATCAGGCACAGCACTATAAGGCATATCATCTTTACTCTTAGACTCCGCCATGAGGACTCCAATXXXXXXXXXXCTATCAATTGGAAAGGAAAGTATGTCAACAGAACTGACGACTTCTGCCAAAAAAATTATTGAACTCCAAATCCAAAACGAAAAAGTTCCGATACCAGATA
CTTCCTCCACCCCACCAAAATCAACAGCCGGATTCGTATCAGGCACAGCACTATAAGGCATATCATCTTTACTCTTAGACTCCGCCATGAGGACTCCAATXXXXXXXXXXCTATCAATTGGAAAGGAAAGTATGTCAACAGAACTGACGACTTCTGCCAAAAAAATTATTGAACTCCAAATCCAAAACGAAAGAGTTCCGATACCAGATA
>Marker434677
TGCACTATGATAAGTATAATTAAACTTAAGTTCTCAAGTTGTCAGAGTATCAACTTAGGTGACTAAATTATACATCGGATTAACTTTGGTAACCATTTCTXXXXXXXXXXCCAGGCACTCATGTCTAAGAGATCATCATCATCTAACCACAACAACCACCACCTTTCTGCCGACCAGCCATCGACTACTCATCCTCGGAAGTCAAAAAGC
TGCACTATGATGAGTATAATTAAACTTAAGTTCTCAAGTTGTCAGAGTATCAACTTAGGTGACTAAATTATACATCGGATTAACTTTGGTAACCATTTCTXXXXXXXXXXCCAGGCACTCATGTCCAAGAGATCATCATCATCTAACCACAACAACCACCACCCTTCTGCCGACCAGCCATCGACTACTCATCCTCGGAAGTCAAAAAGC
>Marker438922
AAGATTTCCTGGTTGCTTGCTCCAAGTGTTTGAGAATTTGGAAGCTTTGACGATGGATTCTCGAAGTTTCTATTGGAAGCACTTTGTATTATTTTGTTTAXXXXXXXXXXTTTTAACTAATTAATCGCTGCCATCCACTCTAACAAAAATGAAGAGGTGGCTGCCTCTTGGAAGAAAATAGAAGTGAGCCTGAACTCGGGCTTGAAGTTG
AAGATTTCCTGGTTGCTTGCTCCAAGTGTTTGAGAATTTGGAAGCTTTGACGATGGATTCTCGAAGTTTCTATTGGAAGCACTTTGTATTATTTTGTTTGXXXXXXXXXXTTTTAACTAATTAATCGCTGCCATCCACTCTAACAAAAATGAAGAGGTGGCTGCCTCTTGGAAGAAAATAGAAGTGAGCCTGAACTCGGGCTTGAAGTTG
>Marker441538
TCTTGTAATTATTCCATAATAAATAATGGAAATTATAGCAAAATTGGAGTTGAATTTTGATGATAGGTTGACTTTCTAATCTGAATTTTATTTCTGTATTXXXXXXXXXXGTAACATGTTATATACATATTGCTCAAACCAAAACTGATCCTTCGTTTTTAGCCAATCAGGATCAGTTCCTCGAACCATCATGTGTATATCTCGGGATTC
TCTTGTAATTATTCCATAATAAATAATGGAAATTATAGCAAAATTGGAGTTGAATTTTGATGATAGGTTGACTTTCTAATCTGAATTTTATTTCTGTATTXXXXXXXXXXGTAACATGTTATATACATATTGCTCAAACCAAAACTGATCCTTCGTTTTTAGCTAATCAGGATCAGTTCCTCGAACCATCATGTGTATATCTCGGGATTC
>Marker442592
CACTATATGATCTTCTTAAGAGTATGATGATGTGTTATGCGCTATTTATACATAAGAGAGGAGTTATCACTAATCCTTAAATTCCGTTGGACTAAAAATTXXXXXXXXXXTTTCTTTCTATACATAGAGAAAACAATCAAGAAAGACCCCTAGTCACTTCTTCTAAAATGACCCAGTGAAGTAAGAGGAAAATACCATCATCACCATCTA
CACTATATGATCTTCTTAAGAGTATGATAATGTGTTATGCGCTATTTATACATAAGAGAGAAGTTATCACTAATCCTTAAATTACGTTGGGCTAAAAAAAXXXXXXXXXXTTTCTTTCTATACATAGAGAAAACAATCAAGAAAGACCCCTAGTCACTTCTTCTAAAATGACCCAGTGAAGTAAGAGGAAAATACCATCATCACCATCTA
>Marker445846
CAGCTGCAGAATTCGGCGTGCTGTCCTGCATTCGCCGATCTTGCTGCCGGTGGATTTTAACTGCCATGAAGTCTGCAATAAGCCCAGGCTCCGCAATCTCXXXXXXXXXXTCCACAAGTTGGAGGAGCTGTTTGGATTTGTAGAGCTGATACGCCTTCTCCACTAGGAAGTATTGTTCACCAAGTGTTTGATCAAAGTCTACAGCGGTTA
CAGCTGCAGAATTCGGCGTGCTGTCCTGCGTTCGCCGATCTTGCTGCCGGTTGATTTTAACTGCCATGAAGTCTGCAATAAGCCCAGGCTCCGCAATCTCXXXXXXXXXXTCCACAAGTTGGAGGAGCTGTTTGGATTTGTAGAGCTGATACGCCTTCTCCACTAGGAAGTATTGTTCACCAAGTGTTTGATCAAAGTCTACAGCGGTTA
>Marker446648
ATGATTTCCAGAAGCAACTCAGAGAAGAGAAGGTGAGAATGGGAGGTAAAACTTTTTTGTATTTGATCCGGAAATACAATAATGAGAAAGGTTCAAGTCCXXXXXXXXXXAGTAACATCGGGCTTCACGCTATTAAAATCACGTGAAATTCTTGAAATATAAAACTCATAAAAACTTTCAAAAATTACCTAACAAACCGCAACACGATAA
ATGATTTCCAGAAGCAACTCAGAGAAGAGAAGGTGAGAATGGGAGGTAAAACTTTTTTGTATTTGATCCGGAGATACAATAATGAGAAAGGTTCAAGTCCXXXXXXXXXXAGTAACATCGGGCTTCACGCTATTAAAATCACGTGAAATTCTTGAAATATAAAACTCATAAAAACTTTCAAAAATTACCTAACAAACCGCAACACGATAA
>Marker446652
TTGCAACACATTATGGTGATTGCAATATATTGTTAGGTAGACCTTTCCTAGCCACTGTTGAAGTAGTAATTGATGTGTGTAAAGGTTGTCTATCCTTGAAXXXXXXXXXXTCGAGATTTATGTGCACTTATAGGTGTCTATGACTAATGGTCAGATGACATGGAGTAGAGGAAACAGGCAAAAGCTCTTGAACACTCAAGTCCTATTCAA
TTGCAACACATTATGGTGATTGCAATATATTGTTAGGTAGACCTTTCCTAGCCACTGTTGAAGTAGTAATTGATGTGTGTAAAGGTTGTCTATCCTTGAAXXXXXXXXXXTCGAGATTTATGTGCACTTATAGGTGTCTATGACTAATGGTCAGATGACATGGAGTAGAGGAAACATGCAAACGCTCTTGAACACTCAAGTCCTATTCAA
>Marker446655
TCCATTGCCATCAATTTGGTCGGGATCGTCCGCGACCCTTTATTCGTAGTCAGAGCTAATCTTGCAATTCATCCTTCTTCGTTAAATTTCTCAAGATCTTXXXXXXXXXXTAATTTTGTTATCAAAAGTAATATGTGAAATTGAAATTTAAAATTTGATTCATTGTGAACCGTCAAGATCGAAAGATTAAAATGAACGTTGATGATATAT
TCCATTGCCATCAATTTGGTCGGGATCGTCCGCGACCCTTTATTCGTAGTCAGAGCTAATCTTGCAATTCATCCTTCTTCGTTAAATTTCTCAAGATCTTXXXXXXXXXXTAATTTTGTTATCAAAAGTAATATGTGAAATTGAAATTTAAAATTCGATTCATTGTGAACCGTCAAGATCGAAAGATTAAAATGAACGTTGATGATATAT
>Marker447380
ATGGGCAGGTGGGTGAACCGGGCGATTAAGAACCGGTTCTGCCCGATTCTCGAGTCGGCTCAACTTCGGGGCGATCCGATTGACCTCCAGGACTTGCTGCXXXXXXXXXXTTCAGCGATTCATCGTGCCCGAGCTCGTGTGGAAGCTGAGGAAACGGCTCGGGCTCGGAATGGAAGTTAGTATGACTCAAAGCCTTAATCATATTGATGG
ATGGGCAGGTGGGTGAACCGGGCGATTAAGAACCGGTTCTGCCCGATTCTCGAGTCGGCTCAGCTTCGGGGTGATCCGATTGACCTCCAGGACTTACTGCXXXXXXXXXXTTCAGCGATTCATCGTGCCCGAGCTCGTGTGGAAGCTGAGGAAACGGCTCGGGCTCGGAATGGAAGTTAGTATGACTCAAAGCCTTGATCATATTGATGG
>Marker447408
TTGTCCAAAATCATCAATACACGTAAGCTCGAGCTGGCAGGCTTAGCGAAGAGCAGTAGCAATGGGGACCCACACGACGACTTGTTGTCCCGGTTTATGAXXXXXXXXXXTCAACCAATCATCATCCGACTGGCTAAAGGAGCCACTCGGGTTCGAAGAGGTTGACCAATTGATATATCTCAAGGCTGCATTATCCGAGACACTAAGGTT
TTGTCCAAAATCATCAATACACGTAAGCTCGAGCTGGCAGGCTTAGCAAAGAGCAGTAGCAACGGGGACCCACACGACGACTTGTTGTCCCGATTCATGAXXXXXXXXXXTCAACCAATCATCATCCGACTGGCTAAAGGAGCCACTCGGGTTCGAAGAGGTTGACCAATTGATATATCTCAAGGCTGCATTATCCGAGACACTAAGGTT
>Marker451780
TCTTCTAAGGTTTAAGGGCGAAAACAGGGCTGAGCGCAGCTCTCAGCGAGTAGACGAGAAGCAGAGCCTGAGCGAGGGCAGCTATGAATCCAGCGACGAGXXXXXXXXXXGCCTGATAATTAATAATAAATGACCGAATAATTAATGAATTAATTTGGAATTATATTAATAATTAATTTGCAGATTATAGGTTGATTAAGCGTTGATTAG
TCTTCTAAGGTTTAAGGGCGAAAACAGGGCTGAGCGCAGCTCTCAGCGAGTAGACGAGAAGCAGAGCCTGAGCGAGGGCAGCTACGAATCCAGCGACGAGXXXXXXXXXXGCCTGATAATTAATAATAAATGACCGAATAATTAATGAATTAATTTGGGATTATATTAATAATTAATTTGCAGATTATAGGTTGATTAAGCGTTGATTAG
>Marker452711
ACATATAAAAAATTTACTAATTCTTCTTAAAATACAAAGAAAATTATGTAATATTAAAACTCAAAATCTAGAATTATACTAGGTCGTAGTCTGGGAGAGAXXXXXXXXXXATAGCATCCATCTTAAACGGTTTCTAGTTGAACTATTAGTAGAAACTGGCACATACTATGTTACTACTACTCATGTGCAATTATGTCTCAAATGATTTTT
ACATATAAAAAATTTACTAATTCTTCTTAAAATACAAAGAAAATTATGTAATATTAAAACTCAAAATCTAGAATTATACTAGGTCGTAGCCTGGGAGAGAXXXXXXXXXXATAGCATCCATCTTAAACGGTTTCTAGTTGAACTATTAGTAGAAACTGGCACATACTATGTTACTACTACTCATGTGCAATTATGTCTCAAATGATTTTT
>Marker455367
TGATATCAAATTGGGCCGAAAAATCCATCAAATGTCGTAATGGTCAATTTTCGCTGAATTTCGACATAGCGGAGTTGGGCTCCAATCGTTTCGGCCGATTXXXXXXXXXXTGTTTAACAATACAATATTGATACGAATTTCATACCTGGACAAAATTTGGTTACTACAGTTGCGCCTCTTTGTATTACTTTCGGTTGGAGGCAGAAAGTA
TGATATCAAATTGGGCCGAAAAATCCATCAAATGTCGTAATGGTCAATTTTCGCTGAATTTTGACATAGCGGAGTTGGGCTCCAATCGTTTCGGCCGATTXXXXXXXXXXTGTTTAACAATACAATATTGATACGAATTTCATACCTGGACAAAATTTGGTTACTACAGTTGCGCCTCTTTGTATTACTTTCGGTTGGAGGCAGAAAGTA
>Marker455511
ATTCTAGTTGATGTAAATTATATGTCAAAGTGGGCAGAGGCGCAAGTGCTGCCTACTAACGATGCACGTATAGTGGGAAAGTTTATCACCAGCCTTTTATXXXXXXXXXXATCGAACCGCCTTCAAGACTCTTATTGACACTTTGCCATATCAACTGGTTTATCACAAGGCTTGTCATTTGTCGATTCAGCTTGAGCACAAAGTATGGTG
ATTCTAGTTGATGTAAATTATATGTCAAAGTGGGCAGAGGCGCAAGTGCTGCCTACTAACGATGCACGTATAGTGGGAAAGTTTATCACCAGCCTTTTATXXXXXXXXXXATCGAACCGCCTTCAAGACTCTTATTGACACTTTGCCATATCAACTGGTTTATCACAAGGCTTGTCATTTATCGATTCAGCTTGAGCACAAAGTATGGTG
>Marker458841
TTGCAACCTTTTCTTTGGTGTTTGCAATTTCACATTGAAGGCTCACTGTTTTCCACAAGATATAGTTATTCAATGCTTCATTTTGTCTGCTTTACATTGCXXXXXXXXXXAATTGCTTGATTCACTTTTAACGTGTATCAACTGATTACTAACAATCTGTGTCACTGCTTTAACTATTTCATTAGAGTTGTTACTTACATGAGATTGAAT
TTGCAACCTTTTCTTTGGTGTTTGCAATTTCACATTGAAGGCTCACTGTTTTCCACAAGATATAGTTATTCAATGCTTCATTTTGTCTGCTTTACATTGCXXXXXXXXXXAATTGCTTGATTCACTTTTAATGTGTATCAACTGATTACTAACAATCTGTGTCACTGCTTTAACTATTTCATTAGAGTTGTTACTTACATGAGATTGAAT
>Marker458863
TGAAGTTGGAGGCTGAAGATGGAACTGGGTTGATCACCATGTCTGAAATTGCTAGCAAGGTTGCAGAACTTCTTATTGATGATACCATAAGAAATAATGCXXXXXXXXXXGCACACACACTTTGTGTCTAGCCTTTACGAATTTACTTTGGGGTGCATCATGCTGACTTTCCAGGAAGTAGCCTGAGCACGCTTCTTCAAAATACTTCTT
TGAAGTTGGAGGCTGAAGATGGAACTGGGTTGATCACCATGTCTGAAATTGCTAGCAAGGTTGCAGAACTTCTTATTGATGATAACATAAGAAATAATGCXXXXXXXXXXGCACACACACTTTGTGTCTAGCCTTTACGAATTTACTTTGGGGTGCATCATGCTGACTTTCCAGGAAGTAGCCTGAGCACGCTTCTTCAAAATACTTCTT
>Marker458887
ATGTTTTCCCCATGCTCAAGTTGGCACATAAGTTGACCGACCATGGAATCAGCGTCACTGTCACTAATTTGGATTTCATTCATCGCATGATTATAGCAGAXXXXXXXXXXGCAGGTCCATGGTGGGATCAGGCTGGTTTCACTTCCTGATGGATTCCGTTCCAATTCCGACAGCAGTGATCATAGAATGTTCACAGAGGCTGTGAAGAAA
ATGTTTTCCCCATGCTCAAGTTGGCACATAAGTTGACCGACCATGGAATCAGTGTCACTGTCACTAATTTGGATTTCATTCATCGCATGATTATAGCAGAXXXXXXXXXXGCAGGTCCATGGTGGGATCAGGCTGGTTTCACTTCCTGATGGATTCCGTTCCAATTCCGACAGCAGTGATCATAGAATGTTCACAGAGGCTGTGAAGAAA
>Marker459109
TTTTTCTTGACTTATATGTCTCCACCTTCTTTTTGAGATTTTATGGTATCGTTGGAACGTTTGTTGGGATATGTGGTGTATTTGTTTTCTCCATGCTTGTXXXXXXXXXXTAAAGTTCTAGCATACCGTTTCCTGTATTTTGACCATCAACATATTTTGACCATCAACAACTGATTCACCAACATCTAGCCCTTCCTTTGCATTTCGTGT
TTTTTCTTGACTTATATGTCTCCACCTTCTTTTTGAGATTTTATGGTATCGTTGGAACGTTTGTTGGGATATGTGGTGTATTTGTTTTCTCCATGCTTGCXXXXXXXXXXTAAAGTTCTAGCATACCGTTTCCTGTATTTTGACCATCAACATATTTTGACCATCAACAACTGATTCACCAACATCTAGCCCTTCCTTTGCATTTCGTGT
>Marker459286
TTATTTAATAATACTATTAATTATGATTGTAGTAATACTATCCAATCGTAAGCAATTACTCACAGAAATTCCTAGTGTATTTAGGAACATGAAGTAAAATXXXXXXXXXXACAAAGAATGGGATACTTTTTGGTGGGTCATATGTGACTCTCCTTGTCAAATACTATGCTTGCCAAGACTTATTCTTCCGCCTTCTTAACGACAAAACAT
TTATTTAATAATACTATTAATTATGATTGTAGTAATACTATCCAATCGTAAGCAATTACTCACAAAAATTCCTAGTGTATTTAGGAACATGAAGTAAAATXXXXXXXXXXACAAAGAATGGGATACTTTTTGGTGGGTCATATGTGACTCTCCTTGTCAAATACTATGCTTGCCAAGACTTATTCTTCCGCCTTCTTAACGACAAAACAT
>Marker460676
TCTTGTGTGATGATGGATTGGATGATGTTGACCATCTATTTGCTGCATGTTGCTTTAGTAATGTTGGTCACAATCATTTCAGTGTGCATATTGCCAATAAXXXXXXXXXXTCACAATCATTTCAGTGTGCATATTGCCAATAAGGGTGGTTGGGCGAAGGAAGTTGAGCTTGCTGGTAGTAAGTTTGTAGGATTCTTTAATTCAATGATG
TCTTGTGTGATGATGGATTGGATGATGTTGACCATCTATTCGCTGCATGTTGCTTTAGTAATGTTGGTCACAATCATTTCAGTGTGCATATTGCCAATAAXXXXXXXXXXTCACAATCATTTCAGTGTGCATATTGCCAATAAGGGTGGTTGGGCGAAGGAAGTTGAGCTTGCTGGTAGTAAGTTTGTAGGATTCTTTAATTCAATGATG
>Marker460849
TTGGTCTGTTGACCCATGGTGTTTTAATGAGTTGATTATGCTTTTATGATCTATTCTCTATGTGATTAGTGAGATTCTGTTAAGTTTGGTCTAATAAAACXXXXXXXXXXGATGACGTGTCTCTAGTGTAGTTATGTCTATGTTGGTAATGATGCATAGTCCAGTGAACTAGTGGCTTCAGTTGGGTAGAAGAATCAACGAATTATGTTT
TTGGTCTGTTGACCCATGGTGTTTTAATGAGTTGGTTATGCTTTTATGATCTATTCTCTATGTGATTAGTGAGATTCTGTTAAGTTTGGTCTAATAAAACXXXXXXXXXXGATGACGTGTCTCTAGTGTAGTTATGTCTATGTTGGTAATGATGCATAGTCCAGTGAACTAGTGGCTTCAGTTGGGTAGAAGAATCAACGAATTATGTTT
>Marker462395
TTCTCATAGCTGCATTGCCTGCACAGTCAAGAGATGCAATTAGTATGTCAAGAGATTTGAAGATGAACATTCCCCTGTAGTGGTTAGCTGGGTAACCTCGXXXXXXXXXXTTGGGAAATGATCCACCCGGGAATACAGCGGACGTTGGCTGAATTATTTCATTTTATATGCAAACATTTGTTCAGTATTGTTAATTAGCCAATGATCTAA
TTCTCATAGCTGCATTGCCTGCACAGTCAAGAGATGCAAGTAGTATGTCAAGAGATTTGAAGATGAACATTCCCCTGTAGTGGTTAGCTGGGTAACCTCGXXXXXXXXXXTTGGGAAATGATCCACGCGGGAATACAGCGGACGTTGGCTGAATTATTTCATTTTATATGCAAACATTTGTTCAGTATTGTTAATTAGCCAATGATCTAC
>Marker468290
CTTTTGGACCGGATGTGGTGTGTCCCATATCCACCTCGAAAGGTATGAACCGGGTTTTTAATTTTCGCAAGGCAGCTAAGCTTATTCTCAATTCCTTCTTXXXXXXXXXXTCTTTATGCTCAGGTGGTTCTTTGTTTTCCAGGGAATGTGTTTTTGCATGAATGAGAGTGCAATTACCCCGCTCTTGTTTTGGTTGGTTGGGCTGGGCTT
CTTTTGGACCGGATGTGGTGTGTCTCATATCCACCTCGAAAGGTATGAACCGGGTTTTTAATTTTCGCAAGGCAGCTAAGCTTATTCTCAATTCCTTCTTXXXXXXXXXXTCTTTATGCTCAGGTGGTTCTTTGTTTTCCAGGGAATGTGTTTTTGCATGAATGAGAGTGCAATTACCCCGCTCTTGTTTTGGTTGGTTGGGCTGGGCTT
>Marker468915
CCCCTTCCCCCAGATATTTGACAGGGAGTTTATTCAAGATGAAACTAGTTTCATTAGCCATTTGAGCAAAATATCTCGTAGGTCTACGAGCAACAAATAAXXXXXXXXXXTCTCATAAAAAGTGCGAAGAATAGAGCATACCTCTCTCATCGCCCCAATAGAACATCTTGGTGAAGATGAGCAAACCATCTTGAAAACACAGATGATTTA
CCCCTTCCCCCAGATATTTGACAGGGAGTTTATTCAAGATGAAACTAGTTTCATTAGCCATTTGAGCAAAATATCTCGTAGGTCTACAAGCAACAAATAAXXXXXXXXXXTCTCATAAAAAGTGCGAAGAATAGAGCATACCTCTCTCATCGCCCCAATAGAACATCTTGGTGAAGATGAGCAAACCATCTTGAAAACACAGATGATTTA
>Marker473419
TGAAATCCATGTCGAATTCGATGTTCTCGTCCTTAGGAGTTGCTTTAGTAGTATAGAGTTACGTAGTCTGAAATCTGAGGGATCAAGTAGATTCCTTCATXXXXXXXXXXGTGACCTTGTGATTTTGAGTGAAGTGATGGTGGCAATTTGGACCCAACCTCTCTCAATCAACCCGATTCGGTTTGTTTTGGGTTGGTATTATTCCGCGAC
TGAAATCCATGTCGAATTCGATGTTCTCGTCCTTAGGAGTTGCTTTAGTAGTATAGAGTTACGTAGTCTGAAATCTGAGGGATCAAGTAGATTCCTTCATXXXXXXXXXXGTGACTTTGTGATTTTGAGTGAAGTGATAGTGGCAATTTGGACCCAACCTCTCTCAATCAACCCGATCCGGTTTGTTTTGGGTTGGTGTTATTCCGCGAC
>Marker475680
CTAGGGTGCCGCTTACTCCTGCTCCTCTTGAGATACACAATAACATCACAGCTGAAGAAGAAGATACAAATGTGGCAAGTGATTCACATCCAAATTGTGAXXXXXXXXXXTTTCAATGCCATCAAGTGATCGTTGCAGCAGACATGAAAGGTTCTAAAATAGTGAGAACCCAAGTCTTCCAAGTGTGTCGATATAAACTGTTGAAATCAA
CTAGGGTGCCGCTTACTCCTGCTCCTCTAGAGATACACAATAACATCACAGCTGAAGAAGAAGATACAAATGTGGCAAGTGATTCACATCCAAATTGTGAXXXXXXXXXXTTTCAATGCCATCAAGTGATCGTTGCAGCAGACATGAAAGGTTCTAAAATAGTGAGAACCCAAGTCTTCCAAGTGTGTCGATATAAACTGTTGAAATCAA
>Marker475946
TTAAATTTTGGCAAATGTCATGTTTATGAAATGGATTTCAAATCACTTCCATATCTCACTCCATTTTCTTCATGATATCTTCCAAATTTTAAAAACAAACXXXXXXXXXXTTAAATTTGATAGAAAATTATTTTAAATAAATAAGTAGGTGAGTAAAACTGCCAATTACTAAGAGAATTATATAACCAATCAAATTTTATATATAATTTA
TTAAATTTTGGCAAATGTCATGTTTATGAAATGGATTTCAAATCACTTCCATATCTCACTCCATTTTCTTCATGATATCTTCCAAATTTTAAAAACAAACXXXXXXXXXXTTAAATTTGATAGAAAATTATTTTAAATAAATAAGTAGGTGAGTAAAACTGTCACTTACTAAGAGAATTATATAACCAATCGAATTTTATATATAATTTA
>Marker475990
TCATCATAGCTCTGCCGGCATGGAACTATCAATGGTGCATCGTCGGAAAATTCTCACTTGTCGGGAAATCAATTTCCCAAAGATGTGTCGCACGTTGTCCXXXXXXXXXXTGGCAACCGGGACGAGGAGTCGAAATTGATGCATTGGAGGACCGAAAATTCCTGTTTCGATTTCACCATGACCGAGACGTTAATCGAGTTATGGATGATA
TCATCATAGCTCCGCCGGCATGGAACTATCAATGGTGCATCGTCGGAAAATTCTCACTTGTCGGGAAATCAATTTCCCAAAGATGTGTCGCACGTTGTCCXXXXXXXXXXTGGCAACCGGGACGAGGAGTCGAAATTGATGCATTGGAGGACCGAAAATTCCTGTTTCGATTTCACCATGACCGAGACGTTAATCGAGTTATGGATGATA
>Marker476015
CTCTGAAGGTAGCTGTCCAAGTCACCCTCAAAGGCACTCTGCATAACACTTATGAGGTCATCCAAGAATAAGCTCCCCCTAGTGCTGATGTCCTGAGTGTXXXXXXXXXXCTATCTCCGTTATCATCTCCCTTGCTGACGGCACCACTCTATTATACGCTGCATGGATTGTATAGATTTGAACGGGTAGTAATTAGATAATTCATAAAAT
CTCTGAAGGTAGCTGTCCAAGTCACCCTCAAAGGCACTCTGCATAACACTTATGAGGTCATCCAAGAATAAGCTCCCCCTAGTGCTGATGTCCTGAGTGTXXXXXXXXXXCTATCTCCGTTATCATCTCCCTTGCTGACGGCACCACTCTATTATACGCTGCATGGATTGTATAGATTTGAACGGGAAGTAATTAGATAATTCATAAAAT
>Marker476211
AAAGGGTATAAGATGCCCCGATCACCACTCGACTGCATCAGATTCTTCTGACAGCGAGAAGCTTGGGTTAGATAGCTTCTGGAGCCTGGTTCTGATAGCTXXXXXXXXXXTACTTTTAGGACAGAGAGAGTTGGTGATCTGGTCAATCTCGCCGATTCGAATAATGTGCAGCACTACTCCTTGAAGGAGCCGGATGTGGATCATGATTCA
AAAGGGTATAAGGTGCCCCGATCAGCACTCGACTGCATCAGATTCTTCTGACAGCGAGAAGCTTGGGTTAGATAGCTTCTGGAGCCTGGTTCTGATAGCTXXXXXXXXXXTACTTTTAGGACAGAGAGAGTGGGTGATCTGGTCAATCTCGCCAATTCGAATAATGTGCAGCACTACTCCTTGAAGGAGCCGGATGTGGATCATGATTCA
>Marker476453
TCTCCACGAAGTTAGCTTCCTTTTGTCTCTTCTCCTTCATCAACCCTAGTCTAGCTCACTTAGCATTTTGTTCAAGCATTCTGGGAATTTTTCAGTTGTGXXXXXXXXXXAATTCAATGAACGGTTCAAGCACAGTGAGATTTAGCTCACATTTCTAGGTGAACACATGCTTAATCCTTGTTCCTGATTTTTCTTTTTCATGTCGTATAG
TCTCCACGAAGTTAGCTTCCTTTTGTCTCTTCTCCTTCATCAACCCTAGTCTAGCTCACTTAGCATTTTGTTCAAGCATTCTGGGAATTTTTCAGTTGTGXXXXXXXXXXAATTCAATGAACGGTTCAAGCACAGTGAGATTTAGCTCACATTTCTAGGTGAACACATGCTTAATCCTTGTTTCTGATTTTTCTTTTTCATGTCGTATAG
>Marker476572
ACCGAAAGCTTTGGATGAAGATGAGACTGAGTTTCTTGACAATCTGGAGATGGTAAGTTTCACAGCTACATGATACTTCTTACTTTTGGGAAATTAAGGGXXXXXXXXXXTCGAAAGTTGGTTCTAATCTGTTTGTTCTACTATCAGTCGAGGAAGCAGCTTGAACAACAAGTCGCAGATGAGGAAGCTGAGCAGCTTCGAAGTTTTCAG
ACCGAAAGCTTTGGATGAAGATGAGACTGAGTTTCTTGACAATCTGGAGATGGTAAGTTTCACAGCTACGTAATACTTCTTACTTTTGGGAAATTAAGGGXXXXXXXXXXTCGAAAGTTGGTTCTAATCTGTTTGTTCTACTATCAGTCGAGGAAGCAGCTTGAACAACAAGTCGCAGATGAGGAAGCTGAGCAGCTTCGAAGTTTTCAG
>Marker480106
TCAGGTATGTATATTCTGTCAACTGGACCTAGCAATGATTTAGATGATTTGTGGATATTGGATACCAGAGCTTCTGATCACATAACTTGTTATATCAAACXXXXXXXXXXAACCATCAGGACCATATAAATGACAAGACGATTAGTTTATCCATTCAAAATAGAGGACTCTACCATATTCACACTCAAAACACCAATTCTCAAACTTAAA
TCAGGTATGTATATTCTGTCAACTGGATCTAGCAATGATTTAGATGATTTGTGGATATTGGATACCAGAGCTTCTGATCACATAACTTGTTATATCAAACXXXXXXXXXXAACCATCAGGACCATATAAATGACAAGACGATTAGTTTATCCATTCAAAATAGAGGACTCTACCATATTCACACTCAAAACACCAATTCTCAAACTTAAA
>Marker481881
AGTTAGTTTTTCCGTTTTCGTGAGTCATTAATCAATTATTAAAAACCAAAAAAGCAAAAAAGCAAAGGACATAAGAAATGAAAAATAGAAAATGAATTAAXXXXXXXXXXGCAGCTTTGTAACTTGTTGAGGGAGAGGATGTTGTGGACGTGGTCCCGAACCTTGTGAGCACGGTTGATACCATCGAGGACTACGCGCTTTGTGTCATTG
AGTTAGTTTTTCCGTTTTCGTGAGTCATTAATCAATTATTAAAAACCAAAAAAGCAAAAAAGCAAAGGACATAAGAAATGAAAAATAGAAAATGAATTAAXXXXXXXXXXGCAGCTTTGCAACTTGTTGAGGGAGAGGATGTTGTGGACGTGGTCCCGAACCTTGTGAGCACGGTTGATACCATCGAGGACTACGCGCTTTGTGTCATTG
>Marker484887
TGTCTATAATTTCATTTTGATCCAAGATTTCATAACCTGTCATAGTTTGAAGTGTTGCTGCCATCAATATCCTATTCTAACAATTGAAAAAGAGTATTTTXXXXXXXXXXTATGTCGTGGCTATATCTGAAATGGGATGGCAGATGCCTTGTTTGATATCTAACAAAAATATGAGTCTGCCCATGAGTAGTGGGATGCTCTGGATTCATA
TGTCTATAATTTTATCTTGATCCAAGATCTCATAACCTGTCATAGTTTGAAGTGTTGCTGCCATCAATATCCTATTCTAACCATTGAAAAAGAGTATTTTXXXXXXXXXXTATGTCGTGGCTATATCTGAAATGGGATGGCAGATGCCTTGTTTGATATCTAACAAAAATATGAGTCTGCCCATGAGTAGTGGGATGCTCTGGATTCATA
>Marker484909
AATGGATGGTTCGTCAAAAAAAGTTGACTAACATTCAAGCTTCTGTCTTGACCAATATAATGGCAGAAGAGAGACTAGAAAAAAGGAACCACGACATCAGXXXXXXXXXXGAATTAAATAAAGTGGCAATTAAGATTTTTAGTTTTTAAACTAATTCAATTTTGGAAAATAATTATTTTGAAGGGCTTAGATTCCAGCTCACAAACGGGT
AATGGATGGTTCGTCAAAAAAAGTTGACTAACATTCAAGCTTCTGTCTTGATCAATATAATGGCAGAAGAGAGACTAGAAAAAAGGAACCACGACATCAGXXXXXXXXXXGAATTAAATAAAGTGGCAATTAAGATTTTTAGTTCTTAAACTAATTCAATTTTGGAAAATAATTATTTTGAAGGGCTTAGATTCCAGCTCACAAACGGGT
>Marker487706
AATGTCAGCCTCTCAACTACACTGAAAGGCTGCACCGTCTCAGGTGCCCAGGGAACCAGTGTGACTACTGAAGCCTTGTCTAGCACTAATGACGAGCAGAXXXXXXXXXXATACACCTGTTTTGGCTGCGTCAGTTGGTAATGAAGGTCAATTAGATTCTGATACATCGCTGACTAACCTGAACTCTCTTAAGAATCAGGTTATTTTTAT
AATGTCAGCCTCTCAACTACACTGAAAGGCTGCACCGTCTCAGGTGCCCATGGAACCAGTGTGACTACTGAAGCCTTGTCTAGCACTAATGACGAGCAGAXXXXXXXXXXATACACCTGTTTTGGCTGCGTCAGTTGGTAATGAAGGTCAATTAGATTCTGATACATCGCTGACTAACCTGAACTCTCTTAAGAATCAGGTTATTTTTAT
>Marker487726
TTACCTACAGCACTCAAGCACTTCACGGCTGCAGAGTTGTTGGATGGTGGAGAGAAGCATTATCAATGTCAGCGTTGCAAGCAGAAAGTGAGAGCCAAGAXXXXXXXXXXACAATGCTTTAGTCTGTTAAGACTGTAGACCAAGGATGGATTGATGATTGTTGGATCTTACTTTTTTGCTCCATCACGGCATATATTATGGCATTTTGGA
TTACCTACAGCACTCAAGCACTTCACGGCTGCAGAGTTGTTGGATGGTGGAGAGAAGCATTATCAATGTCAGCGTTGCAAGCAGAAAGTGAGAGCCAAGAXXXXXXXXXXACAATGCTTTAGTCTGTTAAGACTGTAGACCAAGGATGGATTGATGATTGTTGGATCTTACATTTTTGCTCCATCACGGCATATATTATGGCATTTTGGA
>Marker487848
GCTGGATATTATTGGACTTCACCTATTTAGTAATGCAGGTAAATAGAGGTTAAATCGCGAGTCGATGATGGTTATGAGTTTGGTTATGGTGATGTGCAATXXXXXXXXXXGTAAGGATTGCCAAGCTTAATTTTGGTGTATAGGGTTTATAGTTTAATTTGTGGACATATAATTTATTATTGGATTTATGGTAAAGAATAAATGTTTAGA
GATGGATATTATTGGACGTCACCTATTTAGTAATGCAGGTAAATAGAGGTTAAATCGCGAGTCGATGATGGTTATGAGTTTGGTTATGGTGATGTGCAATXXXXXXXXXXGTAAGGATTGCCAAGCTTAATTTTGGTGCATAGGGTTTATAGTTTAATTTGTGGACATATCATTTATTATTGGATTTATGGTAAAGAATAAATGTTTAGA
>Marker492912
CATTCTGGACATTCACTCTTATAATGTCCAAACTTATGGCACTTGAAACATTCCACTGACTCCTTATTCCAGCCTCTACCTGATCTTCCTCTTCCCCTTGXXXXXXXXXXTAGCACAGACAACGTAATTGAACTGTTCAGTTAATATTCTTAGAATTTTTTCCATGATTTGAACATCTGTCAAATCCTCTCCACAGCTTCTCATAGAATT
CATTCTGGACATTCACTCTTATAATGTCCAAACTTATGGCACTTGAAACATTCCACTGACTCCTTATTCCAGCCTCTACCTGATCTTCCTCTTCCCCTTGXXXXXXXXXXTAGCACAGACAACGTAATTGAACTGTTCAGTTAATATTCTTAGAATTTTTTCCATGATTTGAGCATCTGTCAAATCCTCTCCACAGCTTCTCATAGAATT
>Marker493443
TGATGTTGTAACGACGTGGCACCGTTTGGCAGCATAGGATATGAGTCAGGAAGCGGCATTTGGCATTCCTCTCCTCCAAAAAACACTCTTCTAGGCAGTGXXXXXXXXXXGCCAATCCCCAGAACAGAACAACCTCGTCTGCGGTTAAGTTGACGTAAGATATAAATAACTGTGATATATATCTATGTCTGGATGGAAGGAATTATTATA
TGATGTTGTAACGACGTGGCACCGTTTGGCAGCATAGGATATGAGTCAGGAAGCGGCATTTGGCATTCCTCTCCTCCAAAAAACACTCTTCTAGGCAGTGXXXXXXXXXXGCCAATCCCCAGAACAGAACAACCTCGTCTGCGGTTAAGTTGACGTAAGATATAAATAACTGTGATATATATCTATGTCTGGATGGAAGGAATGATTATA
>Marker493474
CTATCTTTTCATTTTGTTTTTATGTCATTGGAAATGTTTTGCTAGCTTGCTGGCTAGATTGCATACTTTTTTTCTGTGTGTGTTTCATTATCCGTTATAGXXXXXXXXXXGAAGCAGGATTGGTTGTGTCTCTTGCTATCTATTTATCTGTTTTTGTTTCTTGCTGTCAATGGTTTATAATTCTGCTTGCCCGATTGCTCCTTTTTTTAT
CTATCTTTTCATTTTGTTTTTATGTCATTGGAAATGTTTTGCTAGCTTGCTGGCTAGATTGCATACTTTTTTCTGTGTGTGTTTCATTATCCGTTATAGGXXXXXXXXXXGAAGCAGGATTTGTTGTGTCTCTTGCTATCTATTTATCTGTTTTTGTTTCTTGCTGTCAATGGTTTATAATTCTGCTTGCCCGATTGCTCCTTTTTTTAT
>Marker493524
TTTTTGGTCTTTTTATCCAGCAGAATCTCCAACGGTCGATTACCTGAATTGAAACGGCAAAATAGAGGACGGAATCTGCCCAGCTCCCTTCTTTGCAATCXXXXXXXXXXACTGTGAAGAATGTTAATTTCGGAGGAACTCTCGCCAATTTCACCTGGAAGAGAATGGTATAAGATCTGTAGACAATGATGATTGGCGGAGCCAGAAATT
TTTTTGGTCTTTTTATCCAGCAGAATCTCCAACGGTGGATTACCTGAATTGAAACGGCAAAATAGAGGACGGAATCTGCCCAGCTCCCTTCTTTGCAATCXXXXXXXXXXACTGTGAAGAATGTTAATTTCGGAGGAACTCTCGCCAATTTCACCTGGAAGAGAATGGTATAAGATCTGTAGACAATGATGATTGGCGGAGCCAGAAATT
>Marker493652
TTGCTTGTTCAGAATGTAGGTTGCAGGCTTTCAATTTTCTATACAAGTTATGTTTATGTTGCAAATATGGTTACATGTCCAGACCTGTTAATGCTAGCACXXXXXXXXXXTCTGGAATAGCAAAAAGAAAAAGGAAAGGAACTTGACTATTAGGATGTGTTGTGTGTATAATCCTGAAAGGGCTCCTGCAATAAGCTCCTCTGTTCTTAT
TTGCTTGTTCAGAATGTAGGTTGCAGGCTTTCAATTTTCTATACAAGTTATGTTTATGTTGCAAATATGGTTACATGTCCAGACCTGTTAATGCTAGCACXXXXXXXXXXTCTGGAATAGCAAAAAGAAAAAGGAAAGGAACTTGACTATTAGGATGTGTTGTGTGTATAATCCTGAAAGGGCTCCTGTAATAAGCTCCTCTGTTCTTAT
>Marker494160
TTCATTCCCTGTTACCAAACGACCCCTTAGAGTTGCTCTCCGGATAAATTTATTCTGTCCCGTTACCCGAAAAGCAGGAAAATGCCGCCAATGGCAGCAGXXXXXXXXXXCTGCTGGATATGAAAGTTGATTCATTTGTCTGAAATTCTCCGGTGGAATGAAGCCCATGCTGCTGCAACCGGTTCGGAAGTAGGAATCCCGGTTGAGGTT
TTCATTCCTTGTTACCAAACGACCCCTTAGAGTTGCTCTCCGGATAAATTTATTCTGTCCCGTTACCCGAAAAGCAGGAAAATGCCGCCAATGGCAGCAGXXXXXXXXXXCTGCTGGATATGAAAGTTGATTCATTTGTCTGAAATTCTCCGGTGGAATGAAGCCCATGCTGCTGCAACCGGTTCGGAAGTAGGAATCCCGGTTGAGGTT
>Marker494506
TAGACCTAGAAGTGGGGAGAGTTGGTTGATTTTGAAATCGGTTTTTGATGTATTTAAGAACTTGGAGTTACATCTCCACTTTTCTCTATTTACAACTTGTXXXXXXXXXXGGGTGGGGTTTTGCACAACCTTAATGAAGTCGTATGTCCCATTAGTGGACTAGATATTGCACCAGAAAGCGGAATCGCAGCTCGCAACGGTTCTCAATGT
TAGACCTAGAAGTGGGGAGAGTTGGTTGATTTTGAAATCGGTTTTGGATGCATTTAAGAACTTGGAGTTGCATCTCCACTTTTCTCTATTTACAACTTGTXXXXXXXXXXGGGTGGGTGTTTACACAACCTTAATTAAGTCGTCTGTCCCATTAGTGGACTAGATATTGCACCAGAAAGCGGAATCGCAGCTCGCAACGGTTCTCAATGT
>Marker494524
CCATGTATGTCGGAACCTTATGAGGGAAAGAAAGGAAGAACACTGATTGGAATGGGAAGACAGTCCCACCACCATTATTTAGGCTGTTTCTTTGTGCTTTXXXXXXXXXXTGATGCTGCCATAAGTGGTAAGAGAGAGACTGAGCAGACGAGAGGAGAAGAGGAAAGTAATCCACAGCCATTCATCCGTTGCTATTTATAGTAAAATATT
CCATGTATGTCGGAACCTTACGAGGGAAAGAAAGGAAGAACACTGATTGGAATGGGAAGACAGTCCCACCACCATTATTTAGGCTGTTTCTTTGTGCTTTXXXXXXXXXXTGATGCTGCCATAAGTGGTAAGAGAGAGACTGAGCAGACGAGAGGAGAAGAGGAAAGTAATCCACAGCCATTCATCCGTTGCTATTTATAGTAAAATATT
>Marker494608
TTCTGGTGTCCAACCGTGGAAGTGTTTTATTTCCTAATTCGTGGCTTACCTCCTGTGCGGCGTAGGAGTTGAGGAATGGAGAATGGTATTCCACCTCAAAXXXXXXXXXXTTCCAGGAAGCTGTTGAAGGGAAAAGGGGATGCTTGGAGCCCTTTTATTCTCGGTCTTAGCCTTTGATTGAGGTGGGGGTCCCTGTTTAATTATCGTGTT
TTCTGGTGTCCAATCGTGGAAGTGTTTTATTTCCTAATTCGTGGCTTACCTCCTGTGCAGCGTAGGAGTTGAGGAATGGAGAACGGTATTCCACCTCAAAXXXXXXXXXXTTCCAGGAAGCTGTTGCAGGGAAAAGGGGATGCTTGGAGCCCTTTTATTCTCGGTCTTAGCCTTTGATTGAGGTGGGGGTCCCTGTTTAATTACCGTGCT
>Marker494632
AAGACAACAACACTTAGCACATGCCAACTGAATGGTCACCATACCCCACCACCCACAAATTCACCACACAGGAGGCAATACAATCCTCAACCAGAATCCTXXXXXXXXXXCTACTATAACTTGTTTTGTAGCAGAATCATAGAATTGAGGATTAACTCTCTTTCTTTTGAGAAAAGTGCCTAGCAAAACAATCATCAGCACAGGAAATAA
AAGACAACAACACTTAGCACATGCCAACTGAATGGTCACCATACCCCACCACCCACAAATTCACCACACAGGAGGCAATACAGTCCTCAACCAGAATCCTXXXXXXXXXXCTACTATAACTTGTTTTGTAGCAGAATCATAGAATTGAGGATTAACTCTCTTTCTTTTGAGAAAAATGCCTAGCAAAACAATCATCAGCACAGGAAATAA
>Marker500975
CTAAAAGACAATAAATTGCTCATAAATAAATAAATAAAAAGAAGTTGAATTCATTTACAAATCAAAGACACGTAAAGGCATTTCTATTCAAGAGCTTGCCXXXXXXXXXXACGTTCATATACGCTCCAATAGCTGAATTATAAGCCACGGTGTTTAATCTAATCCCCCGCATGTCAGCTGCCGATAGCACTGCATCGATATTAACTTTTC
CTAAAAGACAATAAATTGCTCATAAATAAATAAATAAAAAGAAGTTGAATTCATTTACAAATCAAAGACACGTAAAAGCATTTCTATTCAAGAGCTTGCCXXXXXXXXXXACGTTCATATACGCTCCAATAGCTGAATTATAAGCCACGGTGTTCAATCTAATCCCCCGCATGTCAGCTGCCGATAGCACTGCATCGATATTAACTTTTC
>Marker501237
AAAAGCGAAATCATTTTCCCTCTCTAATTAGGCTTAATGCTTAGGTTTTTACACAATCTCAGCCCTACATTCACTGCTGGAGGCGGAAATGAAAACCAAAXXXXXXXXXXGGCGCCCAATGTCATCGCGAAGTAAGTCGAGACCTTCACCATTTTCTTCTTCTTCTTGTTCTTCTTCACAAATCGCTTCTTTTGCTCGAGATTTCGCCGA
AAAAGCGAAATCATTTTCCCTCTCTAATTAGGCTTAATGCTTAGGTTTTTACACAATCTCAGCCCTACATTCACTGCTGGAGGCGGAAATGAAAACCAAAXXXXXXXXXXGGCGCCCAATGTCATCGCGAAGTAAGTCGAGACCTTCACCATTTTCTTCTTCTTCTTGTTCTTCTTCACAAATCGCTTCTTTTGCTCGAGATTTCGCTGA
>Marker501413
CAATTTCCTAGATACGTGTTGCCAATTGCCTTGATCGACAACCTTCAACTTTTTGGAACTGAAAAATGAATATAAAAAAGATTGGCATTCGCCCATTGAGXXXXXXXXXXTGTATGTAGTTTTATGTTAATGTTAAAAGTTAGAACAAAACAAGTTTTACAGACAATTAGTTAAACTGTGAAATTAGAGTGGCGCAGCGGAAGCATGGTG
CAATTTCCTAGATACCTGTTGCCAATTGCCTTGATCGACAACCTTCAACTTTTTGGAACTGAAAAATGAATATAAAAAAGATTGGCATTCGCCCATTGAGXXXXXXXXXXTGTATGTAGTTTTATGTTAATGTTAAAAGTTAGAACAAAACAAGTTTTACGGACAATTAGTTAAACGGTGAAATTAGAGTGGCGCAGCGGAAGCATGGTG
>Marker504065
TTAATGAGCTTCTAGTTGGCGAAATCAGGAGGGATGAAGGCTTGACCGATGAGTGCCTGAAAGATTTTTCATTGAGAAGCTATCATGGATTTGGACCATGXXXXXXXXXXTGGCACATGCCTCTTGTTAGTCGCAATCCTCCCACGAACAGTTTGTCGCACGCACGGTTTGGTCGTAGTCCACCCGCGACAAATAGTTGGCTTTGTTGCG
TCAATGAGCTTCTAGTTGGCGAAATCAGGAAGGATGAACGCTCGACCGATGAGTGCCTGAAAGATTTTTCATTGAGAAGCTATCATGGATTTGGACCATGXXXXXXXXXXTGGCACATGCCTCTTGTTAGTCGCAGTCCTCCCACGAACAGTTTGTCGCACACACGGTTTGGTCGTAGTCCGCCTGCGACAAATAGTTGGCTTTGTCGCG
>Marker504088
TCAAGAACAGCTCCCGGGAAACACCAAGCAAAATCCCAACAATCATCAATGTTGAGTAAAAGGACACATGGAGGGAGGACACGCCATAACCATATTGAATXXXXXXXXXXAAGCAAGAAGCTCCAATCAAGAGGAGCGCCCCACCGTGAAAGGCTCGATTATCGGCAAACACAAACTTCATCCTCACACCATAGGAGGTAGAGAGATATA
TCAAGAACAGCTCCCGGGAAACACCAAGCAAAATCCCAACAATCATCAATGTTGAGTAAAAGGACACATGGAGGGAGGACACGCCATAACCATATCGGATXXXXXXXXXXAAGCAAGAAGCTCCAATCGAGAGGAGTGCCCCACCGTGAAAGGCTGGATTACCGGCAAACACAAACTTCATCCTCACACCATAGGAGGTAGAGAGATATA
>Marker508481
GTGTTCAGCCCCTGTAACTTTTAGCCCATTTTTTCATCATCAGGACACGCCGTGTTCCAGAGAACACACCTTGGGACACACCGTGTTCTACGCCGTGTTCXXXXXXXXXXCTGTCCAGCTGCTCTTAATCAGTCCGTTTTCGCTCCCGCTTATCCTCAAACACCTTGTATTGCCTGAAAATGTATCAAAAACACACCGAACACGTAATAC
GTGTTCAGCCCTTGTAACTTTTAGCCCATTTTTTCATCATCAGGACACGCCGTGTTCCAGAGAACACGCCTTGGGACACACCATGTTCTACGCCGTGTTCXXXXXXXXXXCTGTCCAGCTGCTCTTAATCAGTCCGTTTCCGCTCCCGCTTATCCTCAAACACCTTGTATTGCCTGAAAATGTATCAAAAACACACCGAACACGTAATAC
>Marker509825
TGTGACACCCCGATTTTGGGTCAACCATGGGTTCAAGTTTTAGAGACGAACCGGTTGAGTTTTGGGCTTGTAATTGGTCGACCACAGGCGTGACCGTAGTXXXXXXXXXXCTTGTAATTGGTCGACCACAGGCGTGACCGTAGTCAGTCATGGGCGTGATGATTAGACCGATCACAGTCGTGGGGAACAGTTAACTAATGAGAGTTAGTA
TGTGACACCCTGATTTTGGGTCAACCATGGGTTCAAGTTTTAGAGACGAACCGGTTGAGTTTTGGGCTTGTAATTGGTCAACCACAGGCGTGACCGTAGTXXXXXXXXXXCTTGTAATTGGTCAACCACAGGCGTGACCGTAGTCAGTCATGGGCGTGATGATTAGACCGATCACAGTCGTGGGGAACAGTTAACTAATGAGAGTTAGTA
>Marker511909
TCTAATCCTACGCATTCATGGCTTTAGCCAGTGGTGGAGTCCTAGGCAACTTACTTGATGGCATCTTCTTGCAAAAGACAGCCTCCAAAACCATGTTTGTXXXXXXXXXXTTCCATTGCCATGGTTCTTGTTCTTTCAGGCTTGGTGTTCTACTATCAGACTCAATGTTTAAATCTTGACCCTTCAGTCATTGGATTGTCTAAGGTAATT
TCCAATCCTACGCATTCATGGCTTTAGCTAGTGGCGGAGTCCTAGGCAACTTACTTGGTGGCATCTTCTTGCAAAAGACAGCCTCCAAAACCATGTTTGTXXXXXXXXXXTTCCATTGCCATGGTTCTTGTTCTTTCAGGCTCGGTGTTCTACTATCAGACTCAATGTTTAAATCTTGACCCTTAAGTCATTGGATTGTCTAAGGTAATT
>Marker511938
CGATATTTAATCGAGGATGCCCCTGAATTTGTGGAGAGAGATGACAAAGCTTTGATTGCTTAATGCTTGAAAAGTAGCTGAATATGTATGTCGCAACTATXXXXXXXXXXAACGGATTAGCGGATAACTTGTATACCGTGTATAGTGGGAGTAACTCCGCGAAAGAACTTTGGGAATCACTTGAACAGAAATATAAAATCAAGAACGTTG
CGATATTTAATCGAGGATGCCCCTGAATCTGTGGAGAGAGATGACAAAGCTTTGATTGCTTAATGCTTGGAAAGTAGCTGAATATGTATGTCGCAACTATXXXXXXXXXXAACGGATTAGCGGATAACTTGTATACCGTGTATAGTGGGAGTAATTCCGCGAAAGAACTTTGGGAATCACTTGAACGGAAATATAAAATCAAGAACGCTG
>Marker511960
CCATGTCAGAATCTGTTGTGAAGAAGGAAAAAGGAAAGGTGCAAGTAAAAGAGCCAGGAAAGCCAGAAGGATTGGGAGAGTGATGATCAACTACATTTGTXXXXXXXXXXTGTTAATGGACATCCTGGTCGAGGATGGTTTCATATGCATGTGGGGTTACGAGCTATGGATGCTGAAGGAAACTCCGTTTTGCAGCTGTCCTCCACCACT
CCATGTCAGAATCTGTTGTGAAGAAGGAAAAAGGAAAGGTGCAAGTAAAAGAGCCAGGAAAGCCAGAAGGATTGGGAGAGTGATGATCAACTACATTTGTXXXXXXXXXXTGTTAATGGACATCCTGGTCGAGGATGGTTTCATATGCATGTGGGGTTACGAGCTATGGTTGCTGAAGGAAACTCCGTTTTGCAGCTGTGCTCCACCACT
>Marker512001
GCGATGGTGTCTGAAGTCAATCTGATGGTATCGAACGCTCGAGAATGGTGGATCGATACTGGTGCGACTCACCACGTTTGTTCGAACAAGGAAACTGTTTXXXXXXXXXXTTCGGGAAGTCTTCTCAACAAAAACGGTTTATGTATGGTGTTTGAATCTGATAAGTTTACTCTTACTAAGAACAGTGTGTTTATTGGAAAAGTTTATGTT
ACGATGGTGTCTGAAGTCAATCTGATGGCATCGAACGCTCGAGAATGGTGGATCGATACTGGTGAGACTCACCACGTTTGTTCGAACAAGGAACTGTTTAXXXXXXXXXXTTCGGGAAGTCTTCTCAACAAAAACGGTTTCTGTATGGTGTTTGAATCTGATAAGTTTACTCTTACTAAGAACAGTGTGTTTATTGGAAAAGTTTATGCT
>Marker512096
AATGGTAAGTCTAGACATATACGTCGAAGACATAATACCATTCACCAACTTCTTGCAACATGAGTTATCTCTCTTGACTACATAAAGTCTAAGGATAACCXXXXXXXXXXCACTAACCCATTCTTGTATGAATAGTGATGGAAATAAAGGAGAAGCATATAACTTTTAATGATTCTAGAGAAATGAATCACCTATGTTAGAGTGAAGTAG
AATGGTAAGTCTAGACATATACGTTGAAGACATAATACCATTCACCAACTTCTTGCAACATGAGTTATCTCTCTTGACTACATAAAGTCTAAGGATAACCXXXXXXXXXXCACTAACCCATTCTTGTATGAATAGTGATGGAAATAAAGGAGAAGCATATAGCTTTTAATGATTCTAGAGAAATGAATCACCTATGTTAGGGTGAAGTAG
>Marker514969
TCCCACTTGGAGAATGAGCCTCACAATCTATATGACTATCTACCTATGGGCATGTTGAGAAGAAAAACCTTCATCTGGCGATAACCCTAACACTACAGGAXXXXXXXXXXGAGAAGAAAAACCTTCATCTGGCGATAACCCTAACACTACAGGAACTGCCAACATTTGAAGGGACTAGATCGTCTAAGAATGATCTACCGCCGGGAGTTG
TCCCACTTGGAGAATGAGCCTCACAATCTATATGACTATCTACCTATGGGCATGTTGAGAAGAAAAACCTTCATCTGGCGATAACCCTAACACTACAGGAXXXXXXXXXXGAGAAGAAAAACCTTCATCTGGCGATAACCCTAACACTACAGGAACTGCCAACATTTTAAGGGACTAGATCGTCTAAGAATGATCTACCGCCGGGAGTTG
>Marker514984
AGGAGTGCAGATGTAAACTTTGCATGGTATGGAGGTGTAAATGTGTATTTTCCCTTTGAATTAAAAGGGTTGAGTTGAGATGGGTGGGAAACTAATCCAAXXXXXXXXXXATTGAAGTTGTTATGTTATTGCATACCCATAGATAAAATAATAAATAGCTACATATTTATAATTAAAATTATAAATAAAAGACTGGATGGATTTGAAACA
AGGAGTGCAGATGTAAACTTTACATGGTATGGAGGTGTAAATGTGTATTTTCCCTTTGAATTAAAAGGGTTGAGTTGAGATGGGTGGGAAACTAATCCAAXXXXXXXXXXATTGAAGTTGTTATGTTATTGCATACCCATAGATAAAATAATAAATAGCTACATATTTATAATTAAGATTATAAATAAAAGACTGAATGGATTTGAAACA
>Marker517286
CAAGGGTATAAAGATTATAGCTTTTCAATGGGTTGGATGAGTATTTTACTTTCTGTTTCTCAACTGAGTAGCTGAATTGGTCCCTCCTGCAGGTAGAAATXXXXXXXXXXATTGTTAATTTCTTTTATTGCAGTTTTTTGTCCTTAATCATAAGTGTATGCATTTGAAATTCGGAGCGCCTTTGTAGGTTGCTGGCAAAGTGAATGCTTT
CAAGGGTATAAAGATTATAGCTTTTCAATGGGTTGGATGAGTAGTTTACTTTCTGTTTCTCAACTGAGTAGCTGAATTGGTCCCTCCTGCAGGTAGAAACXXXXXXXXXXATTGTTAATTTCTTTTATTGCAGTTTTTTGTCCTTAATCATAAGTATATGCATTTGAAATTCGGAGCGCCTTTGTAGGTTGCTGGCAAAGTGAATGCTTT
>Marker517902
ACATATCATTATAGTTAGTAATGGGCTTTCGTCAGTTGTTGGTTTCTCAGCAAAACAAAGATAGAGTCCAAGCAACTCAAATTGCCGATTAGTCGACTAAXXXXXXXXXXATAGTCGTTTGTGGTCATCTATCATCAACGGCTCATATCAGGCATCCGCCTATTCACCACTTCCGGTGTAACAATGTCGGGCAACCCTGCTAACCATTAT
ACATATCATTATAGTTAGTAATGGGTTTTTGTCCGTTGTTGGTTTCTCAGCAAAACAAAGATAGAGTCCAAGCAACTCAAATTGCCGATTAGTCGACTAAXXXXXXXXXXATAGTCGTTTGTGGTCATCTATCATCAACGGCACATATCAGGCATCCGCCTATTCACCACTTCCGGTGTAACAATGTCAGGCAACCCTGCTAACCATTAT
>Marker520573
GCTTTTATAACCATGCCGCTTTGATTGGAATGTTTCACCAACTTCGATCGAGAGCTTGGGAGATTAAGATTATTCACATTTACAGAGAGGCAAATGTTCCXXXXXXXXXXGTTGACGTTTTCTACCAAAAAAAATTATAATCATGTCTGATGAGAGTGATGTTATATAACCAGCATTAACCTATACCTAATCCATACTAGTCTGATACCC
GCTTTTATAACCATGCCGCTTTGATTGGAATGTTTCACCAACTTCGATCGAGAGCTTGGGAGATTAAGATTATTCACATTTACAGAGAGGCAAATGTTCCXXXXXXXXXXGTTGACGTTTTCTACCAAAAAAAATTATGATCATGTCTGATGAGAGTGATGTTATATAACCAGCATTAACCTATACCTAATCCATACTAGTCTGATACCC
>Marker523616
TCCTACCAGAGATGTCTGCCCGCCGGCGAGAACATAATAAAAATTAAATAAATTATAATTAAAGATTGTCTTATTTTAATTAATTTTGATCCTTAGATTAXXXXXXXXXXAGGTTTCAATATGAGAAAGTCAATACAATGATGTCACACAAGAGGGTGTCAACATGAAGGTGGGGTTGTTGTGTTGCGTTAGGAGTCGACATGACATAGA
TCCTACCAGAGATGTCTGCCCGCCGGCGAGAACATAATAACAATTAAATAAATTATAATTAAAGATTGTCTTATTTTAATTAATTTTGATCCTTAGATTAXXXXXXXXXXAGGTTTCAATATGAGAAAGTCAATACAATGATGTCACACAAGAGGGTGTCGACATGAAGGTGGGGTTGTTGTGTTGCGTTAGGAGTCAACATGACATAGA
>Marker526893
CCTCACGTGTTCCTCCTGGCGAGCCAGCTGTTCATGGAAGGGGTGGCGATGTCGGGGGAGAGATTCTCGCTTCCTGTGGGGATATTCGTGCCGGTGTTTTXXXXXXXXXXCGAATATGGGGTTTTGGGGGTTTAATCTGTTTGGGTTTCTGTTGCCGGTGGCGGTTCCGATTTGTATGAAGAAGTATTACTCTGCTTCTCTCCAGATTAA
CCTCACGTGTTCCTCCTGGCGAGCCAGCTGTTCATGGAAGGGGTGGCGATGTCGGGGGAGAGATTCTCGCTTCCTGTGGGGATATTCGTGCCGGTGTCTTXXXXXXXXXXCGAATATGGGGTTTTGGGGGTTTAATCTGTTTGGGTTTCTGTTGCCGGTGGCGGTTCCGATTTGTATGAAGAAGTATTACTCTGCTTCTCTCCAGATTAA
>Marker528900
TTGTAAAAATTCGCCTTATGTATTCGAAAGAACACATCAATGATATGAATAACTTCAACTACATTAAATGATCAAAAACCCGCAATCATCTAATCTAGAGXXXXXXXXXXAAAAAACCTTTTTCTCCTCTTTCCTAGGTTCTACTATATGTCGTCTGTAGGGTCAAAATGTGTCTGAACACTACATTGGCGGATAGAAGACAATAGTGTG
TTGTAAAAATTCGCCTTATGTATTCGAAAGAACACATCAATGATATGAATAACTTCAACTACATTAAATGATCAAAAACCCACAATCATCTAATCTAGAGXXXXXXXXXXTAAAAACCTTTTTCTCCTCTTTCCTAGGTTCTACTATATATCGTCTATAGGGTCAAAATGTGTCTGAACACTACATTGGCGGATAGAAGACAATAATGTG
>Marker529034
ACCGATAAGCTAAGTTTCCTTCAACTTATTCCATCTCTGGTTTAGTTAGTCGCTGAATTTGAAGTTTGGACGACAAGTAAAAGAAGAATGAAGGATTCAAXXXXXXXXXXCGATGAAATTAGGCACCTCTTTGTTTTTGGTTAATAAGATGGTAACCTTTTATGTTTAACTGAAATTTAACTACTTGGTATAATATTCTAGTTGTGCATG
ACCGATAAGTTAAGTTTCCTTCAACTTATTCCATCTCTGGTTTAGTTAGTCGCTGAATTTGAAGTTTGGACGACAAGTAAAAGAAGAATGAAGGATTCAAXXXXXXXXXXCGATGAAATTAGGCACCTCTTTGTTTTTGGTTAATAAGATGGTAACCTTTTATGTTTAACTGAAATTTAACTACTTGGTATAATATTCTAGTTGTGCATG
>Marker529156
CAAACTTATTTTGTGACGGGTTCGGATAAACCCGTGAAAGTTGGTTAAACCCAACAAGAATAAAAACATAGATTTGAATCATTATCCAACAAATCTAAATXXXXXXXXXXGTTCACAAAAATCCCAAAAACATGTATTTTAGAAAGACAGAAACCATAAAAATTCAAACGGTAAATTGTGGTAGACTGGTAGTTCAGAAATTTAAACAAA
CAAACTCATTTTGTGACGGGTTCGGATAAACCCGTGAAAGTTAGTTAAACCCAACAAGAGTAAAAACATAAATTTGAATCATTATCCAACAAATCTAAATXXXXXXXXXXGTTCACAAAAATCCCAAAAACATGTATCTTAGAAAGACAGAAACCATAAAAATTCGAACGGTAAATTGTGGTAGACTGGTAGTTCAGAAATTTAAACAAA
>Marker529196
TCAACATCAACCGGCAATCCAACCTCCCTCTTCAAAATGGCTAATGGAAGAAGCTGCTTTGATTGCTAATAGTCTGAAAAGTGTCAGGTTTGTGGAAACTXXXXXXXXXXAAGGTTGACGCTGTGGCTTCTTCGGGGGTATTCGGTGAAAGCCTGGGATCACAGACAGCATCAGCTACTCCAGCTAGTTTTAGGAGGAGTCCTGTTAGCC
TCAACATCAACCGGCAATCCAACCTCCCTCTTCAAAATGGCTAATGGAAGAAGCTGCTTTGATTGCTAATAGTCTGAAAAGTGTCAGGTTTGTGGAAACTXXXXXXXXXXAAGGTCGACGCTGTGGCTTCTTCGGGGGTATTTGGTGAAAGCCTGGGATCACAGACAGCATCAGCTACTCCAGCTAGTTTTAGGAGGAGTCCTGTTAGCC
>Marker529233
CTCACCCGAGCTTCGCCTGGAGAAGCCTATGAAATTCAATTACATTGATACTGAAGGGAGAATGATGGCGCATTGGTGATGGTAATGCAGTTAGGGCTTGXXXXXXXXXXAGTATACGGTTCGATCTGCATACTGTCTATACATGGAACAGATCATCGATCGAACTTGACACCGGAGAGAAGGCAACTGGAATGCACTGTGGGATATTGA
CTCACCTGAGCTTCGCCTTGAGAAGCCTATGGAATTCAATTACATTGATACTGAAGGGAGAACGATGGCGCATTGGTGATGGTAATGCAGTTAGGGCTTGXXXXXXXXXXAGTATACGGTTCGATCCGCATACTGTCTATACATGGAACAGATCATCAATCGAACTCGACACCGGAGAGAAGGCAACTGGAATGCACTGTGGGATATTGA
>Marker529799
ACCAACTTCTCAGAAACCGAAATCTGGTTGACTGACTTGACATACACTTCCTGGACACTAGTAATTTTAGCTTTCCCTTTCCCTTTCACTGCCTTGACTTXXXXXXXXXXTTATTTTAATTTGGTGGTTATGTTGGTCACTTGGCTCAAACGTGGTTTGCTTCGGCAGTGCTGAAACATCATTTTAGTCGTTTTATCCTGGATGAAAGAA
ACCAACTTCTCAGAAACCGAAATCTGGTTGACTGACTTGACATACACTTCCTGGACACTAGTAATTTTAGCTTTCCCTTTTCCTTTCACTGCCTTGACTTXXXXXXXXXXTTATTTTAATTTGGTGGTTATGTTGGTCACTTGGCTCAAACGTGGTTTGCTTCGGCAGTGCTGAAACATCATTTTAGTCGTTTTATCCTGGATGAAAGAA
>Marker529814
TGTTAAAGAGGAAGTCTAGTTGCACGGTCCTTATGCACACTCGGATCCAACCACACAAGTAGCCTCAAACCCGTATACATTCTCAATACTGTCCAGGCTAXXXXXXXXXXGATCTGCCTGCCTCTAGTGAAAGTCATCTACATTTTTTTGGGAAAGGATGGCATCCAATTCTTGAGCCTATTTGTCCTTATTTTTAGATGACCTTAGCTT
TGTTAAAGAGGAAGTCTAGTTGCACGGTCCTTATGCACACTCGGATCCAACCACACCAAGTAGCCTCAAACCCGTATACATTCTCAATACCGTCCAGGCTXXXXXXXXXXGATCTGCCTGCCTCTAGTGAAAGTCGTCTACATTTTGTTGGGTAAGGATGGCATCCAATTCTTGAGCCTATTTGTCCTTATTTTTAGATGACCTTAGCTT
>Marker529827
CATTTTTGTAACTCTTTTTTACAGTTATTCAAAGATACCTCAGAGTTGGGACCGGATGCCCAGTTGTTAGTGATGATTTCCGAGACATCCATGTTACTCAXXXXXXXXXXTTTGGGAAGTTAATGTGCCACGAGTTAGTGACTAGAACAAGATCAAGTCAGCTGTTGATGCGAGAGCTTCCCTCTTGACAATTCGTCCACGTGAAGGGAG
CATTTTTGTAACTCTTTTTTACAGTTATTCAAAGATACCTCGGAGTTGGGATCGGATTCCTAGTTGTTAGTGATGATTTTCGAGACATCCATGTTACTCAXXXXXXXXXXTTTGGGAAGTTAATGTGCCACGAGTTAGTGACTAGAACAAGATCAAGTTAGCTGTTGATGCGAGAGCTTCCCTCTTGACAATTCGTCCACGTGAAGGGAG
>Marker529851
TTACTTTATCGGTAGTTGAGGGTGAGTATGTTATTTACAATGATGCCTCATATTCGGGGTTAGGCTGTGTTCTGATGCAGGATGGAAAGGTAGTGGCTTAXXXXXXXXXXCTTTTAGGATCAAGACTAATCACAAGAGTCTCAAATACTTGATGGAGCATAACAAGCTGAACAATAGGCAGAGACGCTCGGTTGAACTACTTAAGGGGAA
TTACTTTATCGGTAGTTGAGGGTGAGTATGTTATTTACAATGATGCCTCATATTCGGGGTTAGGTTGTGTTCTGATGTAGGATGGAAAGGTAGTGGCTTAXXXXXXXXXXCTTTTAGGATCAAGACTAATCACAAGAGTCTCAAATACTTGATGGAGCAGAACAAGCTGAACAACAGGCAGAGACGCTCGGTTGAACTACTTAAGGGGAA
>Marker529852
ACTTTCTGCTTTTTGGCTAAAATTAAGCCAGAAAGACCAAAGAAAGAAGATCCACATAATCACAATTTAATCAAAATCTTAATTAATAAGCTATGACGACXXXXXXXXXXCGCAGTTGCTTGCCAATGGCAGTAAGATTGTTTCTACATGATCACAAGATTATAGGATTGCATATATGATAAAGGAGATAAACACACAGGACAAGAACCT
ACTTTCTGCTTTTTGGCTAAAATTAAGCCAGAAAGAGCAAAGAAAGAAGATCCACATAATCACAATTTAATCAAAATCTTAATTAATAAGCTATGACGACXXXXXXXXXXCGTAGTTGCTTGCCAATGGCAGTAAGATTGTTTCTACATGATCACAAGATTATAGGATTGCATATATGATAAAGGAGATAAACACACAGGACAAGAACCT
>Marker530392
TTCTTCTTTTTAAGACTCTTGTCCATATTCCTCCGAGTCCGCCGCCAGCCATTTCCTTATTATATCGCCTTCCTCACACTCTTCTTGCACCAGCGCTGGAXXXXXXXXXXAGAGGCTTTTGCTGCGGCTGCTGCCTAAATGCGATCATGTTTTCCATCTCAAGTGTATAGATAGGTGGTTGACTTTCCACCTCACGTGCCCGGTTTGTCG
TTCTTCTTTTTAAGACTCTTGTCCATATTCCTCCGAGTCCGCCGCCAGCCATTTCCTTATTATATCGCCTTCCTCGCACTCTTCTTGCACGAGCGCTGGAXXXXXXXXXXAGAGACTTTTGCTGCGGCTGCTGCCTAAATGCGACCATGTTTTCCACCTCAAGTGTATAGATAGGTGGTTGACTTTCCACCTCACGTGCCCGGTTTGTCG
>Marker531800
GAAGCTTCCACATCTTTCCACTATAGAAATTGAAACCAAATCGAAATCACTTACTAGTAAAAAGTGGTAATTAAAAGTCTTTAGATGCCTCATTCAGTTAXXXXXXXXXXGGCTTTCAGCCTGTGTTTGGGTGCGTGTTCGATCACCAGGGCAAAGTTAAGGGTTTTTGTGACTGGACTTCGTATAGTTTGGGAGAGAGGTTACCGGAAA
GAAGCTTCCACATCTTTCCACTATAGAAATTGAAACCAAATCGAAATCACTTACTAGTAAAAAGTGGTAATTAAAAGTCTTTAGATGCCTCATTCAGTTAXXXXXXXXXXGGCTTTCAGCCTGTGTTTGGGTGCGTGTTCGATCACCAGGGCAAAGTTAAGAGTTTTTGTGACTGGACTTCGTATCGTTTGGGACAGAGGTTACTGGAAA
>Marker533150
CAAAGCGAACAATATTTTGTTGGGGAAGGTTGGGGTGTTACATACATACCCTTCAATCTGCAAAAAAACAACAAACTAAAATAAATTTCTACACCAATTCXXXXXXXXXXTCCAAAGTCAAGATGGCGAACACGACTAGGGTGGTCCTTACCCTTAAATGTCCGACCAACAACATCATTTAGGCTAATGTATGTATGTGCCTCTGGGTCC
CAAAGCGAACAATATTTTGTTGGGGAAGGTTGGGGTGTTACATACATACCCTTCAATCTTCAAAAAAACAACAAACTAAAATAAATTTCTACACCAATTCXXXXXXXXXXTCCAAAGTCAAGATGGCGAACACGACTAGGGTGGTCCTTACCCTTAAATGTCCGACCAACAACATCATTTAGGCTAATGTATGTATGTGCCTCTGGGTCT
>Marker533763
TGGTGAGTAGTCCTTCCGCAGTTACCACTTGTTTGTTTCATATTGTGTCGTAATTTGGAGATATAGAGGATGCAAGAGCTATGCTAGAACTTGAACTGTTXXXXXXXXXXATGCTTCAATTCCTGTGTTATGATTCTGTTGCTGAGCCTCTCTATTAGGAGTTCGTCCTTGGCTCTCGACATGAAATCCTCTTCTTATGAAGGTCAAATA
TGGTGAGTAGTCCTTCCGCAGTTACCACTTGTTTGTTTCATATTGTGTCGTAATTTGGAGATATAGAGGATGCAAGAGCTATGCTAGAACTTGAACTGTTXXXXXXXXXXATGCTTCAATTCCTGTGTTATGATTCTGTTGCTGAGCCTCTCTATTAGGAGTTCCTCCTTGGCTCTCGACATGAAATCCTCTTCTTATGAAGGTCAAACA
>Marker535790
TGAAAATAGAATTCAGCATCAATCTCATTGTCTTGAAACTAATTGAAATATTTTCGGTTGAAAAATTTGGAAATCATTAATGTTTTCTTCTACTTTTGTGXXXXXXXXXXGACTTCAAGTTATTATCCCATTGCATCGAAGTCAGAATTTTGTCCAAGTGGGTATTTCAACGAAATATAAAATTAATATCATAATATTAAGGAAAGTTCT
TGAAAATAGAATTCAGCATCAATCTCATTGTCTTGAAACTAATTGAAATATTTTCGGTTGAAAAATTTGGAAATCATTAATGTTTTCTTCTACTTTTGTGXXXXXXXXXXGACTTCAAGTTATTATCCCATTGCATGGAAGTCAGGATTTTGTCCAAGTGGGTATTTCAACGAAATATAAAATTAATATCATAATATTAAGGAAAGTTCC
>Marker539578
AGGAAACCAGAAGGGGAAAGTTCAAGTGCAGCCTCCCAAGGGAGAGCAAAGAAGCACCAATCTAGTTGATGCCAATCATATATATCTCTATAGCCAAATTXXXXXXXXXXTTCAGCCTTCCAACATTCCAAGTGATACATAATCGACAGTTGCTTGATGTTGTTAATTTTTTAATGGAGATAAATGTGTTTATTTTGTAATGGTTAGCTT
AGGAAACCAGAAGGGGAAAGTTCAAGTGCAGCCTCCCAAGGGAGAGCAAAGAAGCACCAATCTAGTTGATGCCAATCATATATATCTCTATAGCCAAATTXXXXXXXXXXTTCAGCCTTCCAACATTCCAAGTGATACATAATCGATAGTTGCTTGATGTTGTTAATTTTTTAATGGAGATAAATGTGTTTATTTTGTAATGGTTAGCTT
>Marker539586
GCTTCTGATGCAAGGACCACACCCTCATTTAAACAAAACCACAAAGAGTGCTCCATTACATAATTGCCACATCCAGATAATCTCCAATCTGCAACAAAGTXXXXXXXXXXACACGACACACAATAATCCCTCATGATCTTTGATCACCATTACCAGTCACAAACAAACATCTATAACTTTCATGGAGACCAACCTCTCGCACCACAAAAC
GCTTCTGATGCAAGGATCACACCCTCATTTAAACAAAACCACAAAGAGTGCTCCATTACATGATTGCCACATCCAGATAATCTCCAATCTGCAACAAAGTXXXXXXXXXXACACGACACACAATAATCCTTCATGATCTTTGATCACCATTACCAGTCACAAACAAACGTCTATAACTTTCATGGAGACCAACCTCTCGCACCACAAAAC
>Marker539656
TGGCTGACGGCTGTAGTGAACTTATAATATAAATAACCGGAGGAGTTAACCGGTTGCGAGCTGGTTAGGTTACTTGAGTAAGAACCAATACGGCAAAACTXXXXXXXXXXCAGCCGCGACGCCGACTGCTGACCACGCTCTACGCTTCGAGGTTGGATATAAGGAAACTATCGCATCACATCTGACTCCAAATGAAATACTTGGAAAGCT
TGGTTGACGGCTGTAGTGAACTTATAATATAAATAACCGGAGGAGTTAACCGGTTGCGAGCTGGTTAGGTTACTTGAGTAAGAACCAATACGGCAAAACTXXXXXXXXXXCAGCCGCGACGCCGACTGCTGACCACGCTCTACGCTTCGAGGTTGGATATAAGGAAACTATCGCATCACATCTGACTCCAAATGAAATACTTGGAAAGCT
>Marker539951
TTCAGCAAGCTATCCGAGTAGGAGTAGAGTGATGGTCCTCCTTGGTCTCCTTCATAGCTACTCTCAACGTTCAACATCCATTATGGTAAAGTTGCTAGAAXXXXXXXXXXGCTCCAATAGGTGCTTAAGACTCTCATGGTTAGTGACTATTGGGAATGGTCTTCCTTCTAGATAGTGTCTCCACCGGCTAAGAGCAAAAAACACTGCCAT
TTCAGCAAGCTATCCGAGTAGGAGTAGAGTGATGGTCCTCCTTGGTCTCCTTCATAGCTACTCTCAACGTTCAACATCCATTATGGTAAAGTTGCTAGAAXXXXXXXXXXGCTCCAATAGGTGCTTAAGACTCTCATGGTTAGTGACTATTGGGAATGGTCTTCCTTCTAGATAGTGTCTCCACCGGATAAGAGCAAAAAACACTGCCAT
>Marker543126
AGACGTGGCAACTGAACCGAAACTATGATCAAACTTAAATTTTCCCCAAGGTCAATGTCGCCTTTGACCACTTCAAACCAAAAAAAAAATCGGCGAGTTTXXXXXXXXXXAGGTCCGGACATTAGGTCGGGAACATCTAAAGGGAAACAGAAGAGTGAGTGGACTGAAAGCTTACCTCCGCCACTTGGATTACAAGCCCTCGTAACTACG
AGACGTGGCAACTGAACCAAAACTATGATCAAACTTAAATTTTCCCCAAGGTCAATGTCGCCTTTGACCACTTCAAACCAAAAAAAAAAATCGGCGAGTTXXXXXXXXXXAGGTCCGGACATTAGGTCGGGAACATCTAAAGGGAAACAGAAGAGTGAGTGGACTGAAAGCTTACCTCCGCCACTTGGATTACAAGCCCTCGTAACTACG
>Marker543177
CATAATTGGGGTGGATATGGTGGGGAGGCTGGGGATTTGGCAGTTGGAGGTGCAAGTATTGCATGGTGGGTATGCTAAATAGCAATTCCAACCTGCACAAXXXXXXXXXXTGGGCTGCTTGTGTTCCATAGCTGAGCTGTAGTTGTTTTAGTTTTGTTCCACTTATAAAAAATACATCTATTGTATATAACATAATGCAGCGCAGCTCGC
CATAATTGGGGTGGATATGGTGGGGAGGCTGGGGATTTGGCAGTTGGAGGTGCAAGTATTGCATGGTGGGTATGCTAAATAGCAATTCCAACCTGCACAAXXXXXXXXXXTGGGCTGCTTGTGTTCCATAGCTGAGCTGTAGTTGTTTTAGTTTTGTTCCACTTATAAAAAATACATCTATTGTATATAACATGATGCAGCGCAGCTCGC
>Marker548673
CAAAATCTTCCCGGAAAATCGAATTGAGAAGCAGAAAAATGGCGCTGACGATCGCTTCCCAAGTCGGCGTCGTCCTCCAAGCTCCTCCTCTTAGCCACAGXXXXXXXXXXCGACGAGAACGGTGACGACGATCGTAACTCTAGCTTTCTCCGTGGCGCGACTGTTCTCGAATTCCCTCCTGAAGAAGCTTGCTCTGTTGCCGTCGCCGTT
CAAAATTTTCCCGGAAAATCGAATTGAGAAGCAGAAAAATGGCGCTGACGATCGCTTCCCAAATCGGCGTCGTCCTCCAAGCTCCTCCTCTTAGTCACAGXXXXXXXXXXCGACGAGGACGGTGACGACGATCGTAACTCTAGCTTTCTCCGTGGCGCGACTGTTCGCGAATTCCCTCCTGAAGAAGCTTGCTCTGTTGCCGTCGCCGGT
>Marker552037
ACCAAAACCATAGCTAACTCTTGCGACCCCTCAGCGTGCAAACCGAATAAGCTTGCCACTTTCGACACTGACTCCAAGATCGTAGAAGTCTCATTCCTCAXXXXXXXXXXCCTAAAATAACTGTTGGGTCACAAAAAGTAGAAGCGACCAGCCTTTCTAAAGGATTTTCCAGCACCTTAAGCCCAAAATCAACCTAGTCAAAGACCCATG
ACCAAAACCATAGCTAACTCTTGCGACCCCTCAGCGTGCAAACCGAATAAGCTTGCCACTTTCGACACTGACTCCAAGATCGTAGAAGTCTCATTCCTCAXXXXXXXXXXCCTAAAATAGCTGTTGGGTCACAAAAAGTAGAAGCGACCAGCCTTTCTAAAGGATTTTCCAGCACCTTAAGCCCAAAATCAACCTAGTCAAAGACCCATG
>Marker553840
AAAGATAAACGGTTCACAATTGAAATCAATCATAGATCTAGAGTGTTCGTTTCTTTTTGACGTTTTAGATTAACACCTTCAGAAGTTCTACTATTCTGTGXXXXXXXXXXCGACACTAAACCCAGACGCCCCACTCTTCATCCCAGCTGCATACAGGCAAGTAGAGGACTTCTCCCCTGAGTGGTGGCAGCTGGTCACCACCACAGCATG
AAAGATAAACGGTTCACAATTGAAATCAATCATAGATCTAGAGTGTTCGTTTCTTTTTGACGTTTTAGATTAACAGCTTCAGAAGTTCTACTATTCTGTGXXXXXXXXXXCGACACTAAACCCAGACGCCCCACTCTTCATCCCAGCTGCATACAGGCAAGTAGAGGACTTCTCCCCTGAGTGGTGGCAGCTGGTCACCACCACAGCATG
>Marker557249
AAAAGACAAATACAAAAAGGGAACACCAAGCTGCTTCTTGAAGAACCAAAGTAGTGAAGACTGAAGACAACCATTACAGAAGAACCAGGCATAGGAGAAGXXXXXXXXXXTTCATTGCCCAGACTTCAGCCTCAAATTCAGTTGCCTTGTTAGAATAACAATGCACAGAAGAACTTCAACAGAGTAGCGAGAGCCCGTGAACAATTAGGA
AAAAGACAAATACAAAGAGGGAACACCAAGCTGCTTCTTGAAGAACCAAAGTAGTGAAGACTGAAGACAACCATTACAGAAGAACCAGGCATAGGAGAAGXXXXXXXXXXTTCATTGCCCAGACTTCAGCCTCAAATTCAGTTGCCTTGTTAGAATAACAATGCACAGAAGAACTTCAACAGAGTAGCGAGAGCCCATGAACAATTAGGA
>Marker557258
CCTGCCAGGCTGACCCAAAGCGAAAGGTAACAAGTTCTGGTGCATAACATGTCCCAGTCTGCACCTTGACAGTTGATATGGGATTCCTTTGACAACTGGAXXXXXXXXXXACCTAACTAAGACAACGAGAACTTAATCCACAGCCAATGGCAATCAGAAACCTAAACAGGGAACCCATTGTGGACGACGCAGAGGTGGATTTCATCAATA
CCTGCCAGGCTGACCCAAAGCGAAAGGTAACAAGTTCTGGTGCATAACATGTCCCAGTCTGCACCTTGACAGTTGATATGGGATTCCTTTGACAACTGGAXXXXXXXXXXACCTAACTACGACAACGAGAACTTAATCCACAGCCAATGGCAATCAGAAACCTAAACAGGGAACCCATTGTGGACGACGCAGAGGTGGATTTCATCAATA
>Marker557305
TTCAAAAGACGGTCAGATAGGGCGACCATCTCTGGGAATACTAGCAATCACGCCCTTGAACAACCCACCCCACCCCACCACCTTCTCCAATTATCTGTTGXXXXXXXXXXCATTTTTCAATGTATGTCTGGTAGCCATAAACAGCTCTGAGGTGAGAAGAGAAATAACAAATGCAATCACTCTGACTATGGCATAAAGTGCTGGCGTGCT
TTCAAAAGACGGTCAGATAGGGCGACCATCTCTGGGAATACTAGCAATCACGCCCTTGAACAACCCACCCCACCCCACCACCTTCTCCAATTATCTGTTGXXXXXXXXXXCATTTTTCAATGTATGTCTGGTAGCCATAAACAGCTCTGAGGTGAGAAGAGAAATAACAAATGCAATCACTCTGACTATGGCACAAAGTGCTGGCTTGCT
>Marker557390
CACAAGCCCGAACACTTCCAATTGTGACAAGACCAATCAAGCACTGAAAAAACCACAATACTAGGTGGCGCTACACAACATTTAACTTGAATATCACATGXXXXXXXXXXTGAAAGGTCTATCACTATTGCGAAGGGGAGCAGCTGCAGCCTTTCGTGCAAAATCTTTCGCAATAGGAAAATGGCTCCCCTGAAAATTCGACCTCTTCTG
CACAAGCCCGAACACTTCCAATTGTGACAAGACCAATCAAGCACTGAAAAAACCACAATACTAGGTGGCGCTACACAACATTTAACTTGAATACCACATGXXXXXXXXXXTGAAAGGTCTATCACTATTGCGAAGGGGAGCAGCTGCAGCCTTTCGTGCAAAAGCTTTCGCAATAGGAAAATGGCTCCCCTGAAAATTCGACCTCTTCTG
>Marker558485
TAGTCATTGAAAATTAAACCTACATCAATTTGTGTAGCTCTTAAACCTAAAGGAGGACAAAATGAAGAAAGAACACAACATAATTGGACACATTGAATGAXXXXXXXXXXATACATCCAATCCTCTACAATAGAAATGTCCAAGGAAAAGAGATAAAATAAAAGGTATATCAAGAAGCAAATCATGGTTAAAGGCAAAAAGGATAGGTAA
TAGTCATTGAAAATTAAACCTACATCAATTTGTGTAGCTCTTAAACCTAAAGGAGGAGAAAATGAAGAAAGAACACAACATAATTGGACACATTGAATGAXXXXXXXXXXATACATCCAATCCTCTACAATAGAAATGTCCAAGGAAAAGAGATAAAATAAAAGGCATATCAAGAAGCAAATCATGGTTAAAGGCAAAAAGGATAGGTAA
>Marker558539
TCAAAGCTTTTTGTCTGAGGACATGATTTTCATCCTCCAACAGGGCAAGCTTCTTCTCCAGGCTACAATTATTGAAAAGAAACAAGGCATCAAAATGGAGXXXXXXXXXXACATGGGACAGACACCCATAACTTACGGTGGTTGTTTAGTGGATCAATGATTTCTGTTAATTACTTGCAAACAATATAATAAGCATGTCAGTGTCTAAGA
TCAAAGCTTTTTGTCTGAGGACATGATTTTCATCCTCCAACAGGGCAAGCCTCTTCTCCAGGCTACAATTATTGAAAAGAAACAAGGCATCAAAATGGAGXXXXXXXXXXACATGGGACAGACACCCATAACTTACGGTGGTTGTTTAGTGGATCAATGATTTCCGTTAATTACTTGCAAACAATATAATAAGCAGGTCAGTGTCTAAGA
>Marker559163
TTAGGGGCGAAAGACTCGGTCTACTCTAATATGGAGCTAAGTTACTAATAACAAACAATGTTATGCAAGGATTTAAAACTGCCAAGAGCTCAAACTAGCTXXXXXXXXXXAGATACTACCTATCAATCAACCTGAACAAGGGAGACTCCAGCATTTTTCAAAACTTAGTAACATTGACTCATAGACTCAACTGAGTTACATGCCACTAAT
TTAGGGGCGAAAGACTCGGTCTACTCTAATATGGAGCTAAGTTACTAATAACAAACAATGTTATGCAAGGATTTGAAACTGCCAAGAGCTCAAACTAGCTXXXXXXXXXXAGATTCTACCTATCAATCAACCTGAACAAGGGAGACTCCAGCATTTTTCAAAACTTAGTAACATTGACTCATAGACTCAACTGAGTTACATGCCACTAAT
>Marker559208
TGTCTGTCGCAAGTAGTATTTCTATAATATAGTAATAATGTAACAGAGCTCCCCTACGGAGCTTCTTGCAGTGGCGGGGAGTGGGGGAGGGGACAAGGAAXXXXXXXXXXCAAGGTGGGGGGTGAGAACTAGAGTCTGAGCCACTGGTGTCCTTCTATGAATCTGAGGTCCAAGAATGGTCTAACTTGCTCAAGTGTGAAGTTGGTCTTG
TGTCTGTCGCAAGTAGTATTTCTATAATATAGTAATAATGTAACAGAGCTCCCCTACGGAGCTTCTTGCAGTGGCGGGGAGTGGGGGAGGGGACAAGGAAXXXXXXXXXXCAAGGTGGGGGGTGAGAACTAGAGTCTGAGCCACTGGTGCCCTTCTATGAATCTGAGGTCCAAGAATGGTCTAACTTGCTCAAGTGTGAAGTTGGTCTTG
>Marker561936
CTTGAAGGCAACGATCTCATATGGATCCGCTGCGAATAAAAGATACTGGTAGCTCTTATCATACGATTGGACTTTCTGAATACGAGAGAGCATCAACACAXXXXXXXXXXAGAACGAACCTTTATGTTATTAAAGCACAACGTGTATAAAAGAACATCGAGATTGTAGTGTTCTAAGGTTATAACTCATAAATCAAATGTGTATGAACAA
CTTGAAGGCAACGATCTCGTATGGATCCGCTGCGAATAAAAGATACTGGTAGCTCTTATCATACGATTGGACTTTCTGAATACGAGAGAGCATCAACACAXXXXXXXXXXAGAACGAACCTTTGTGTTATTAAAGCACAACGTGTATAAAAGAACATCGAGATTGTAGTGTTCTAAGGTTATAACTCATAAATCAAATGTGTATGAACAA
>Marker564430
ATATGGTAATAGAAACGGAGGGAAATTTGATTGTCGATGTCTAAACCCTGTTATCAGCTTTGTTTGTCACGTGTAATCTCCATGGAAAACCACTTGTTTCXXXXXXXXXXTGTAGAAATCTTCACGAGTGGCATTAAAGGGTAGAATTTCTAGACCTCGATCGTAATATTTCATAGTCATTACCTAGCCAATGTTGTCACCCAAGGTTAT
ATATGGTAATAGAAACGGAGGGAAATTTGATTGTCGACGTCTAAACCCTGTTATCAGCTTTGTTTATCACGTGTAATCTCCATGGAAAACCACTTGTTTCXXXXXXXXXXTGTAAAAATCTTCACGAGTGGCATTAAAGGGTAGAATTTCTAGACCTCGATCGTAATATTTCATAGTCATTACCTCGCCAATGTTGTCACCCAAGGTTAT
>Marker564498
ATCGATATCGAATAGTGCAAAGGATCTGGTGCGCAAGATGCTCACACAGGATCCCAAGAGACGCATTACTTCAGCTCAGGTCCTTGGTATGGAACAGTGAXXXXXXXXXXCCTGGCTCAAGGAAGGAGGGGAGGCTTCAGATAAGCCAATAGACAATGCAGTTCTTTCCAGGATGAAGCAATTTAGAGCAATGAATAAACTCAAAAAGCT
ATCGATATCGAATAGTGCAAAGGATCTGGTGCGCAAGATGCTCACACAGGATCCCAAGAGACGCATTACTTCAGCTCAGGTCCTTGGTATGGAACAATGAXXXXXXXXXXCCTGGCTCAAGGAAGGAGGGGAGGCTTCAGATAAGCCAATAGACAATGCAGTTCTTTCCAGGATGAAGCAATTTAGAGCAATGAATAAACTCAAAAAGCT
>Marker565154
TCAATAGCTCGTTTGATGTAGTTAGATCCCAGCTTCTTCTAATGGATCCAATACCAGACATCAATACTGCATTCAAATGCACCGTTCAACTGGAGCGGCAXXXXXXXXXXACTGTTGATGCGAATCAGCCGAATGTTAATCAAAACATGCTTGGATCAAAGATCCTCTCTATCAGACCAGCAGTCCATGATAGCTGATATGTCGCTATCA
TCAATAGCTCATTTGATGTAGTTAGATCCCAGTTTCTTCTAATGGATCCAATACCAGACATCAATACTGCATTCAAATGCGCCGTTCAACTGGAGCGGCAXXXXXXXXXXACTGTTGATGCGAATCAGCCGAATGTTAATCAAAACAGGCTTGGATCAAAGGTCCTCTCTATCAGACCAGCAGTCCATGGCAGCTGATATGTCACTATCA
>Marker565172
TTACGACGAACCAATCGTTTCTTTCCATTGTTAAAAATGTTCTCGATTTTACCAATTGTCGTGGTGCTATCACAATGGATCAATACTATGGGGACCGGTCXXXXXXXXXXTTCTAATACAACATGAAACCTTTAATAATGCAATAAAAGGTTTGTTGTTCTCTTAAGGTATCTCATCACCTTTACTATAGAACTCCAATGCTCTAAACTG
TTACGACGAACCAATCGTTTCTTTCCATTGTTAAAAATGTTCTCAATTTTACCAATTGTCGTGGTGCTATCACAATGGATCAATACTATGGGGACCGGTCXXXXXXXXXXTTCTAATACAACATGAAACCTTTAATAATGCAATAAAAGGTTTGTTGTTCTCTTAAGGTATCTCATCACCTTTACTATAGAACTCCAATGCTCTAAACTG
>Marker578000
TTTTATTTTGCAGGGAAGGAGACCACTGCTAATCTCATGACTTTTGCCCTTCTCTGCTTAGCCAATCATCAAGATTGGCAAGTTAAAGCCCGGGCGGAAGXXXXXXXXXXAGCCTATCGGTATGTCAAGTGTTTTTTCCTTACTTTTTTGTTTAGATTAAATGATCTATTAAACTTAATTTAATTACTCTCATAATCAGCCTATTAATAA
TTTTATTTTGCAGGGAAGGAGACCACTGCTAATCTCATGACTTTTGCCCTTCTCTGCTTAGCCAATCATCAAGATTGGCAAGTTAAAGCCCGGGCGGAAGXXXXXXXXXXAGCCTATCGGTATGTCAAGTGTTTTTTCCTTACTTTTTTGTTTAGATGAAATGATCTATTAAACTTAATTTAATTACTCTCATAATCAGCCTATTAATAA
>Marker578078
TGGTTAGGGCTGACTCCGAGGTTGAGTTTGTCCGACCCACTGTTGATAAAGGAAGTTCTGTTGAGTAAAGATGGGACCTTTGAGCGATTGGATTCGGACCXXXXXXXXXXATATATACAATTGATAGTTGAAATGAAACTAACTTTGATTCTTTTCACTTGGTTGTATTAAATTCGAATACATAGAGTTGGATGCCGAAAATGGCGGATA
TGGTTAGGGCTGACTCCGAGGTTGAGTTTGTCCGACCCACTGTTGATAAAGAAAGTTCAGTTGAGTAAAGATGGGACCTTTGAGCGATTGGATTCGGACCXXXXXXXXXXATATATACAATTGATAGTTGAAATGAAACTAACTTTGATTCTTTTCACTTGGTTGTATTAAATTCGAATAGACAGAGTTGGATGCCGAAAATGGCGGATA
>Marker579396
TGATGGAGGTAAAGTTAGAGGAAGCTAAATGGGTAAATGCACGATACGATCAGCTGAACCAAATTGAGGAAAAGAGGTTGCCAGTAGCTGAACCAAAAACXXXXXXXXXXAAGTTAGATATACTATGAAATCATGAGTATCGTGGTTCTTGTAACTTGAAATGTCATAAACATCATTCTTGCGGAAGTCAAATTACATGACTCCAATTTT
TGATGGAGGTAAAGTTAGAGGAAGCTAAATGGGTAAATGCACGATACGATCAGCTGAACCAAATCGAGGAAAAGAGGTTGCCAGTAGCTGAACCAAAAACXXXXXXXXXXAAGTTAGATATACTATGAAATCATGAGTATCGTGGTTCTTGTAACTTGAAATGTCATAAACATCATTCTTGCGGAAGTCAAATTACATGACTCCAATTTT
>Marker579447
TTTCCATGCAATTGTTCTTATGTGGAATTAAGAAGTAACGTTGGTTGTGGGCAGTGGTGTAATAACGGGCGTGGGACTTAGAGAACAACGCCCATGATTAXXXXXXXXXXTTGGAACGTAAACCGGGCATGGTATGCGTTCAGAAATCTAGGTAAGGGGGACGGTTTTGTGTGGGGAATGATTAACAACCCAACAACGCCCGATAAACCG
TTTCCATGCAATTGTTCTTATGTGGAATTAAGAAGTAACGTTGGTTGTGGGCAGTGGTGTAATAACGGGCGTGGGACTTAGAGAACAACGCCCATGATTAXXXXXXXXXXTTGGAACGTAAACCGGGCATGGTATGCGTTCAGAGATCTAGGTAAGGGGGACGGTTTTGTGTGGGGAATGATTAACAACCCAACAACGCCCGATAAACCG
>Marker584086
CATGCATACTAAATCGGGTTCCACTAGACTCAACTCAAACCACTAATAAATGCATAAAACAAGCATTAAAGACTAAACTTGAAACCTTTATCTAACCCTTXXXXXXXXXXCTGAGTGGCAAACTAATCATCACGTAGAACTAAGACTGAAAGGATGGATAGAGCATTGAACACTACAAAAAAACATGTCTGGCATTGGACACTTAACAGC
CATGCATACTAAATCGGGTTCCACTAGACTCAACTCAAACCACTAATAAATGCATAAAACAAGCATTAAAGACTAAACTTGAAACCTTTATCTAACCCTTXXXXXXXXXXCTGAGTGGCAAACTAATCATCACGTAGAACTAAGACTGAAAGGATGGATAGAGCATTAAACACTACAAAAAAACATGTCTGGCATTGGACACTTAACAGC
>Marker586677
TTTTTATCTCCAACTCACAGAATTTCGTCATTTTATTTTGTTTCTCATAAATATTTATTGTGTTTTCATAGCTAACCGGCTTATGATGCAAATAAAATTCXXXXXXXXXXTGGTCCATATTTTGGTCGGTGAATAAATATAATGGTGATGGGTCAGAATTCAAAAGATTTACGCAGCGGTGACCTCCCTCTATTTCTGACGTCCGGCGAA
TTTTTATCTCCAACTCACATAATTTCGTCATTTTATTTTGTTTCTCATAAATATTTATTGTGTTTTCATAGCTAACCGGCTTATAATGCAAATAAAATTCXXXXXXXXXXTGGTCCATATTTTGGTCGGTGAATAAATATAATGGTGATGGGTCAGAATTCAAAAGATTTACGCAGCGGTGACCTCCCTCTATTTCTGACGTCCGGCGAA
>Marker588116
ACTTGATTCTCTCAAGGATGGATGCAATGGATGCTCAAATGAAGGCTCTTTCCTTAGCTCAACCGGTTGTCAAGCCTCAAGAAGCATGCATACTTCTTGAXXXXXXXXXXACAGGGGCAAGGCTCTAACCAAGGAGGATCTCACACCAACAATCAAGGAAAACTAAATCAAGATTATAACCAAGGGCAAAGAACTCAAGGGTATAACCAA
ACTTGATTTTCTCAAGGATGGATGCAATGGATGCTCAAATGAAGGCTCTTTCCTTAGCTCAACCGGTTGTCAAGCCTCAAGAAGCACGCATACTTCTTGAXXXXXXXXXXACAGGGGCAAGGCTCTTACCAAGGAGGATCTCACACAAACAATCAAGGAAAACTAAATCAAGATTATAACCAAGGGCAAAGAAATCAAGGGTATAACCAA
>Marker588124
ACTATGTATGAACCGAGATTGGGTTTTAATCTTGGTATTTGGGAAGTGGTTCTCTTCCCTGGTAGAGGCACGAATGATTGGAAATTTGTTGTTTGATCATXXXXXXXXXXTTTAAATTGAAGACCACTAGACCACAGAAACCGCTTACGCGACATACTCGACAAAATATGTAAACTCGAACTACGTGAACTTTAATCCCAATGTTATTGA
ACTATGTATGAACCGAGATTGGGTTTTAATCTTGGTATTTGGGAAGTGGTTCTCTTCCCTGGTAGAGGCACGAATGATTGGAAATTTGATCATTGTATTTXXXXXXXXXXTTTAAATTGAAGACCACTAGACCACAGAAACCGCTTACGCGACATACTCGACAAAATATGTAAACTCGAACTACGTGAACTTTGATCCCAATGTTATTGA
>Marker588136
CCCCATCGGAGGATGAAGGAGAACTCAACCTTTATCTATTGAGAAAGACTGAGAGGAGAAGCAGAGTAAGAAGATGGGTGAAGAAAGGGATTTCAGAACTXXXXXXXXXXTCCACTCATCTATAGCATTCCCAACCATTCACAGCTGTCAGCAGCTTTTGACCACGGGGCTACAATTGTAGGCAACAGTGGCAGCTTTGGACCACAGGTT
CCCCATCGGAGGATGAAGGAGAACTCAACCTTTATCTATTGAGAAAGACTGAGAGGAGAAGCAGAGTAAGAAGATGGGTGAAGAAAGGGATTTCAGAACTXXXXXXXXXXTCCACTCATCTATAGCATTCCCAACCATTCACTGCTGTCAGCAGCTTTTGACCACGGGGCTACAATTGTAGGCAATAGTGGCAGCTTTGGACCACAGGTT
>Marker588140
TTCACTCAAAATCATCTCATCCACTACTCTGCCAAGAACCCTAGTCCAAAAATCAATATCCATCCACCACCATTTAGAGGCAATTGAAAATCAATTGAAGXXXXXXXXXXAAGATGATGATTGTGTCTTTTTTTTCTTTGTGATAGTTTGATCAGGATATGCTAGGCTTTTATGTTGTTTGGTTAGGTGTTATCATGCATGGAAGCTTAA
TTCACTCAAAATCATCTCATCCACTACTCTGCCAAGAACCCTAGTCCAAAAATCAATATCCATCCACCACCATTTAGAGGCAATTGAAAATCAATTGAAGXXXXXXXXXXAAGATGATGATTGTGTCTTTTTTTTCTTTGTGATAGTTTGATCATGATAGGCTAGGCTTTTATGTTGTTTGGTTAGGTGTTATCATGCATGGAAGCTTAA
>Marker588214
GTGTATTGCTCGCATGGTTGTAGGAGCAAATCGTAGTCTACTGCATCTTCAGAGAGTTCACTTAAACTACAACCTCATCCCCGAGTTGTACGTTCATGGTXXXXXXXXXXATGTCGCCATAAAGTTATATTGACAATTTTTACAAATGTCGCCTAAATGTCGTTAATACCTATGTCGTTTAGTTTTTTATGACATTTGTTATAATTGTTG
GTGTATTGCTCGCATGGTTGTAGGAGCAAATCGTAGTCTACTGCATCTTCAGAGAGTTCACTTAAACTACAACCTCATCCCCGAGTTGTACGTTCATGGTXXXXXXXXXXATGTCGCCATAAAGTTATATTGACAATTTTTACAAATGTCGCCTAAATGTCGTTAATGCCTATGTCGTTTAGTTTTTTATGACATTTGTTATAATTGTTG
>Marker588241
CAAACAAGTCTAATTGAGTCCAACTTCTATCATGATTAAGGTATGAGCATTGATTAAATCTCGACATCTTACAAATCTTTTCTCATTGTTGTTTAGTGTTXXXXXXXXXXTTGGAGTCGTTTTTAGTGACACACAAGTTAGTAATGTGCTATAGGGGATGTTTAAAAATCTATCCCTTCAAGTGCCACATACGAGATATGACTTAGTAAT
CAAACAAGTCTAATTGAGTCCAACTTCTATCATGATTAAGGTATGAGCATCGATTAAATCTCGACATCTTACAAATCTTTTCTCATTGTTGTTTAGTGTTXXXXXXXXXXTTGGAGTCGTTTTTAGTGACACACAAGTTAGTAATGTGCTATATGGGATGTTTAAAAATCTATCCCTTCAAGTGCCACATATGAGATATGACTTAGTAAT
>Marker592324
TGAACTTATATGTGGGGAAATCTTGTCATATGGCGTAGCAAGAAACAATCAGTGGTCTCACGGAGCAGTGCAGAAGCAGAATACAGGGCAATGGCAGAAGXXXXXXXXXXTTGAATTGGATAAACAATGTATCTCGGAGAAGGGGAATAGCAAGGAGTTTGACATGATGTATGTTCCTTCTAGACTACAAATTGCAGACATTCTGACAAA
TGAACTTATATGTGGGGAAATCTTGTCACATGGCGTAGCAAGAAACAATCAGTGGTCTCACGGAGCAGTGCAGAAGCAGAATACAGGGCAATGGCAGAAGXXXXXXXXXXTTGAACTGGATAAACAATGTATCTCGGAGAAGGGGAATAGCAAGGAGTTTGACATGATGTATGTTCCTTCTAGACTACAAATTGCAGACATTCTGACAAA
>Marker593255
CGAATTTTCGGAGCAGCAGGAAAAAATGTTGGGTGAGTATAATTTTACCTTCTCAGTTATGATGCCGGTTATCAAGTCTGCAGGGGTGACATCGAAAGCAXXXXXXXXXXGCATAGCACAGAGTGCTAGGCTGTAGGTCCCGATCTTGTTCGCAGTGTCACCTGCAAATAAAAGGTGTTCATGTAAGCCGGTAAGTGACATGTTGTTACA
CGAATTTTCGGAGCAGCAGGGAAAAATGTTGGGTGAGTATAATTTTACCTTCTCAGTTATGATGCCGGTTATCAAGTCTGCAGGGGTGACATCGAAAGCAXXXXXXXXXXGCATAGCACAGAGTGCTAGGCTGTAGGTCCCGATCTTGTTCGCAGTGTCACCTGCAAATAAAAGGTGTTCATGTAAGCCGGTAAGTGACATGTTGTTACA
>Marker593268
TTAAAGGTGGCTACAAATATTAAAAAAACCAGCTACACCCGCTGGTGGCTTAATCCGTGATGAATGGGGACGTTGTCCGCTGGTGGCTTAATCCATGATGXXXXXXXXXXTGCTGTTGATTGGCTTCTTCAGGCTGAAGGAGATATCTTACCAACACTCGATTGAGATTTGGCATTTCCAGCACTGATGAGGAAGGATTGGAGAGTGGAG
TTAAAGGTGGCTACAAATATTAAAAAAACCAGCTACACCCGCTGGTGGCTTAATCCGTGATGAATGGGGACGTTGTCCGCTGGTGGCTTAATCCATGATGXXXXXXXXXXTGCTGTTGATTGGCTTCTTCATGCTGAAGGAGATATCTTACCAACACTCGATTGAGATTTGGCATTTCCAGCACTGATGAGGAAGGATTGGAGAGTTGAG
>Marker593303
TTTTTGTTTTCATCATGTCTATTTTATGTTTTATTAGTGTGTTATTGATAATGTTATCAACAAAAATGTAATCAACATAAAATTGATCGTTTATGCATTAXXXXXXXXXXATTAGCTAGCTCGATTCATTATTATATATTAAAATGAAGTCAAGTTGGTAAATCCAAAGATCTGATTTTATTCTCAGCTTCTTCCATATTCAACGTTTTG
TTTTTGTTTTCATCATGTCAGACATGTATTTTATGTTTTATTAGTGTGTTATTGATAATGTTATCAACAAAAATGTGATCAACATAAAATTGATCGTTTAXXXXXXXXXXATTAGCTAGCTCGATTGATTATTATATATTAAAATGAAGTCAAGTTGGTAAATCCAAAGATCTGATTTTATTCTCAGCTTCTTCCATATTCAACGTTTTG
>Marker593406
ATTCAAGTGGTTCTGAATGTATTGTGCTCCATATGACCCGATTGCTTTGTTCGAAGCAACATCTTCTTCAAGCATGACTTCAGCCGCTTCAACATAAGCCXXXXXXXXXXGATTCACAGCAGTTGGGCGGCTGAGTAAAGCAGAAACAATTAAAAACACAGCCTTTTACAAAACAACTCAAGAAAACAAAAATCCCAAACAGAATTAATA
ATTCAAGTGGTTCTGAATGAATTGTGCTCCATATGACCCGATTGCTTTGTTCGAAGCAACATCTTCTTCAAGCATGACTTCAGCCGCTTCAACATAAGCCXXXXXXXXXXGATTCACAGCAGTTGGGCGGCTGAGTAAAGCAGAAACAATTAAAAACACAGCCTTTTACAAAACAACTCAAGAAAACAAAAATCCCAAACAGAATTAATA
>Marker600673
TTCTAGTTTAGTTGTCATTTAGGTTTGCTTAACGGAAATAATGCCAGTTGGCGTTCAGGATTGCTAGACTGTGAATTATGCAGATATTAGTGAATTTTGTXXXXXXXXXXGGCTTTCTTGCCTTTTTTTCATTGCAGAAGTTAGTAGTATTATTCATACAGTATAGATAGTTCCACAAGCTGTAAGTCTATCATATATCTTATACTCAAA
TTATAGTTTAGTTGTCATTTAGGTTTGCTTGACGGAAATAATGCCAGTTGGCGTTCAGGATTGCTAGACTGTGAATTATGCAGATATTAGTGAATTTTGTXXXXXXXXXXGGCTTTCTTGCCTTTTTTTCATTGCAGAAGTTAGTAGTATTATTCATACAGTATAGATAGTTCCACAAGCTGTAAGTCTATCATATATCTTATACTCAAA
>Marker600686
TGGAATTTGATGTGTTTCCCAGCTAATTCTTGGGTTAGAAGGCACCTGGGAACTGATTGTGTGATGATTAGATGAGATGTCCAGTTTTCCATCCTCTCTAXXXXXXXXXXGTGACCTTCACCTTGCAGTTGCCAGACCGCCTGAAATTTCAACTTGAGTTCTTCAACAGTTGTCTTATTTCGTTACTGTTTCTTGATGGTGTAGGACTAT
TGGAATTTGATATGTGTTTCCCAGCTAATTCTTGGGTTAGAAGGCACCTGGGAACTGATTGTGTGATGATTAGATGAGATGTCCAGTTTTCCATCCTCTCXXXXXXXXXXGTGACCTTCACCTTGCAGTTGCCAGACCGCCTGAAATTTCAACTTGAGTTCTTCAACAGTTGTCTTATTTCGTTACTGTTTCTTGATGGTGTAGGACTAT
>Marker602833
GACGAATTGTTGGAGTAGTGGTGCTGAAGTTGCATAAACAATATTAAGAGAAGAGTATAATTTTAACTTTGAAATATCATCCACTGAATTAGTCCGTCGTXXXXXXXXXXTTACAAGCTAATTTAGACATAAATTCAAGTGAATTAAGGAGAAGCATAATCAATGGATATCAGCATCTCGATCATTTCACATGACATGCATAACGGCGTT
GACGAATTGTTGGAGTAGTGGTGCTGAAGTTGCATAAACAATATTAAGAGAAGAGTATAATTTTAACTTTGAAATATCATTCACTGAATTAGTCCGTCGTXXXXXXXXXXTTACAAGCTAATTTAGACATAAATTCAAGTGAATTAAGGAGAAGCATAATCAATGGATATCAGCATCTCGATCATTTCACATGACATGCATAACGGCGTT
>Marker604172
AAAACCAAAAACAAAAACGGAGATTGTTATATGACGCACTGATTTTTATTATCCAACACCGTGACATTTGAATTCAGCGAGTAAAATTACGCGAATGTCCXXXXXXXXXXGCCACTCGTCGCCGCGGTTTCCTTCTTCCTCCGCTGCAGCTTTGTCTATTTTTATATTGGTTGCAAGTCCGCCCCACCGCCGCGGTAAGATCGCGTCGCC
AAAACCAAAAACAAAAACGGAGATTGTTATATGACGCACTGATTTTTATTATCCAACACCGTGACATTTGAATTCAGCGAGTAAAATTACGCGAATGTCCXXXXXXXXXXGCCACTCGTCGCCGCGGTTTCCTTCTTCCTCCGCTGCAGCTTTGTCTATTTTTATATTGGTTGCAAGTCCGCCCCACCGCCGCGGTAAGATCGCATCGCC
>Marker609596
TTCTACCCTCTATCCCACTCATTCTCTATCATCTATCCTCATTCAATAAAATCTATAACCTTTCCAAAATTTTGGGAGCTCCATATTCGTTTTCATCTTCXXXXXXXXXXCACTGAGGGTTCACCATTTGATTAATTGGGTAGCTCCAAAGATTGGAGTGAACAAATCTATTTTGAGTCGATTTTCGAAACAGAGCATGGCTTTTGTGGA
TTCTACCCTCTATCCCACTCATTCTCTATCATCTATCCTCATTCAATAAAATCTATAACCTTTCCAAAATTTTGGGAGCTCCATATTCGTTTTCATCTTCXXXXXXXXXXCACTGAGGGTTCACCATTTGATTAATTGGGTAGCTCCAAAGATTGGAGTGAACAAATCTATTTTGAGTTGATTTTCAAAACAGAGCATGGCTTTTGTGGA
>Marker609605
TTGTGTGGTTCATCCATTTCTTTCTAGTTTTATAGTAATGCAATCAGATAGGCAGATCCCAAGACCTGCTTTCTTACTGCAAGTTCAGAACTATGGCATTXXXXXXXXXXCAGTCAGAGATGACCAAGAAGTTAAGTAACAAAGAAGATCTCTCATTTCTATCCATCAAATGTCAATCCTACCGCAGGGCGTTTCTTATGAAACACTGAA
TTGTGTGGTTCATCCATTTCTTTCTAGTTTTATAGTAATGCAATCAGATAGGCAGATCCCAAGACCTGCTTTCTTACTGCAAGTTCAGAACTATGGCAGTXXXXXXXXXXCAGTCAGAGATGACCAAGAAGTTGAGTAACAAAGAAGATCTCTCATTTCTATCCATCAAATGTCAATCCTACCGCAGGGCGTTTCTTATGAAACACTGAA
>Marker611913
AATTGTAGGAAAGTAAACACCTTGCACTGTCTCCACAATCTTCATTTGCCATTAACCGCGACCAGATTCAACGAAAGCTACCTTATTTGAACCAAAAACAXXXXXXXXXXGAGGATTCACCACGAGGAAGGAATTTGGCATCTGAGGTATGACCAAAGTCATAGTCTGATCGCAACTTCTCAGCCAAAGCTAAGTAGTTTTCGAACTCTG
AATTGTAGGAAAGTAAACACCTTGCACTGTCTCCACAATCTTCATTTGCCATTAACCGCGACCAGATTCGACAAAAGCTACCTTATTTGAACCAAAAACAXXXXXXXXXXGAGGATTCACCACGAGGAAGGAATTTGGCATCTGAGGTATGACCAAAGTCATAGTCTGATCGCAACTTCTCAGCCAAAGCTAAGTAGTTTTCGAACTCTG
>Marker611975
AGTTGTCGACTTCAAGATACGCTCTTCTTCACTACTACTTCAGCCCAATTCCTCTGCTTCTCGCCTTCTCTACAACCCACTTCCTTCTTCTTCTTCTTCTXXXXXXXXXXTGCTAATTAGGCGACTCCTCCACCCAAGCCTAAAGTTGAAGATGGCATCTTTGGAACATCCGGAGGAATTGGTTTCACCAAGCAGAATGAGCTCTTCGTC
AGTTGTCGACTTCAAGATACGCTCTTCTTCACTACTACTTCAGCCCAACTCCTCTGCCTCTCGCCTTCTCTACAACCCACTTCCTTCTTCTTCTTCTTCTXXXXXXXXXXTGCTAATTAGGCGACTCCTCCACCCAAGCCTAAAGTTGAAGATGGCATCTTTGGAACATCCGGAGGAATTGGTTTCACCAAGCAGAATGAGCTCTTCGTC
>Marker613456
ACGACATATGTGGTCGTCATTGTCCCAATTTTGTTGCTTCCATACTCTTTCCTCTTTCTCCTTCTCATCTGTCTCCGTCTCCTTCTCAAGCTCTGGAAGAXXXXXXXXXXATGGAAAATACTCTTTTCGAATGTTAGCTTATGAGGTTCCAAGTAGCAATGCTTCAAGCTTTGATAGGTGATTAGATCTAGGATCAAGATGGAGTCGTGG
ACGACATATGTGGTCGTCATTGTCCCAATTTTGTTGCTTCCATACTCTTTCCTCTTTCTTCTTCTCATCTGTCTCCGTCTCCTCCTCAAGCTCTGGAAGAXXXXXXXXXXATGGAAAATACTCTTTTCGAATGTTAGCTTATGAGGTTCCAAGTAGCAATGCTTCAAGCTTTGATAGGTGATTAGATCTAGGATCAAGATGGAGTCGTGG
>Marker613571
TTTTCATCTTGCATATTAGTCTAAATCTCAAGCTTGTTGGAACCATCTCTGAACCAATTACTTGGCATGCTTAGAATACTTCACTGTGATTTGCACACTTXXXXXXXXXXGAAAGGAGCTACTTTGATGTGTTTAAAGTAGCATGGACTCTCCAACTTGACGTGACCAAGCATGCATGTTACCGAATTACCATCTAGCAAGACAATGCGA
TTTTCATCTTGCATATTAGTCTAAATCTCAAGCTTGTTGGAACCATCTCTGAACCAATTACTTGGCATGCTTAGAATACTTCACTGTGATTTGCACACTTXXXXXXXXXXGAAAGGAGCTACTTTGATGTGTTTAAAGTAGCATGGACTCTCCAACTTGACGTGACCAAGCATGCATGTTACCGAATTACTATCTAGCAAGACAATGCGA
>Marker613576
TATCATCCTACCAATGATTATAGCTAATTCTTGGACTTAAAGGACTTCTAGAAATATATTGGGTGCAAATGGTCAAGACTAAAAAGTTTCATATCGTGGTXXXXXXXXXXGTCACCATAGGCTTTTACCGGTAATCTTCTCCAAAATTCTTGGAGGACGCCCAAAATCTGGCGAGAGCAACTCAATTCTAGCGTGCCGACAATCCTCAAG
TATCATCCTACCAATGATTCTAGCTAATTCTTGGACTTAAAGGACTTCTAGAAATATATTGGGTGCAAATGGTCAAGACTAAAAAGTTTCATATCGTGGTXXXXXXXXXXGTCACCATAGGCTTTTACCGGTAATCTTCTCCAAAATTCTTGGAGGACGCCCAAAATCTGGCGAGAGCAACTCAATTCTAGCATGCCGACAATCCTCAAG
>Marker613785
AGCAAACAATGATTCAAGGTATAAAAGCATCATACACAGCTTTATAAAACAAGGTTGATCAAAGACCTCAAGGATAACTCTGGGGGAACATCGAGCAAAAXXXXXXXXXXAAGCAGGAAGCTCTAATCGAGAGGAGCATACCATCCCGAAAGGCTCGATTACCAGAAAACAGAAACTTCATCCTCACACCAGAGGAGATAGAGAGATATA
AGCAAACAATGATTCAAGGTATAAAAGCATCATACACAGCTTTATAAAACAAGGTTGATCAAAGACCTCAAGGATAACTCTAGGGGAACATCGAGCAAAAXXXXXXXXXXAAGCAGGAAGCTCTAATCGAGAGGAGCATACCATCCCGAAAGGCTCGATTACCAGAAAACAGAAACTTCATCCTCACACCAGAGGAGATAGAGAGATATA
>Marker613815
TGACAATTTAGGTGATTGGAATGTTTGGGGGTGCCACAATGTGACTAGCACCCCTTGCTTGGTGTTTGTGATGCCATTAAGAGTCTTTTAACACCTAGGCXXXXXXXXXXCGAATCTAGCAACCCTCCACTTCTTATGTTCCACATTTTCAATCTCTTGATTACTTAGTAGCTTGCTTAAATAGAATTTGTTTCTTTTAGTGAATGTTAA
TGACAATTTAGGTGATTGGAATGTTTGGGGGTGTCATAAGGTGACTAGCACCCCTTGCTTGGTGTTTGTGATGCCATTAAGAGTCTTTTAACACCTAGGCXXXXXXXXXXCGAATCTAGCAACCCTCCACTTCTTATGTTCCACATTTTCACTCTCTTGATTACTTAGTAGCTTGCTTAAATAGAATTTGTTTCTTTTAGTGAATGTTAA
>Marker613853
AGTTGTGGAATGTAACTTGGTCAAGTTTAGAAAGATTAAAAGTTATCCAGTTGTAGGAAAAATGCAGGCTTTATTTAGACTCTATTATATTATTTTCGTAXXXXXXXXXXCGTAAAGCTTTCACAATCAATTAGAGTTTTCACATTGCACTAAAAGCATTTTAGGTAACTCTAGCTCGAGGATAGAGCAAACCGAGCTGTCCCCCACTTT
AGTTGTGGCATGTAACTTGGTCAAGTTTAGAAAGATTAAAAGTTATCCAGTTGTAGGAAAAATGCAGGCTTTATTTAGACTCTATTATATTATTTTCGTAXXXXXXXXXXCGTAAAGCTTTCACAATCAATTAGAGTTTTCACATTGCACTAAAAGCATTTTAGGTAACTCTAGCTCGAGGATAGAGCAAACCGAGCTGTCCCCCACTTT
>Marker613885
AAAATACTTAGATCGAGATACCTTGTTGAAGTTCAACTTCGGTTTTGAACATACGATATTTCTCAAGGGCTTCATCCTTTGAATTCACCAAGTAAGTATAXXXXXXXXXXCATTGGCATCAAAAGAGAACAGAAGCCCTTCTTTCGACATACTATTAGACGTTTATAGTTAACGTGTCCTAACCGAGCATTCCATAAGGAGAAGTCAGAG
AAAATACTTAGATCGAGATACCTTGTTGAAGTTCAACTTCGGTTTTGAACATACGATATTTCTCAAGGGCTTCATCCTTTGAATTCACCAAGTAAGTATAXXXXXXXXXXCATTGGCATCAAAAGAGAACAGAAGCCTTTCTTTCGACATACTATTAGACGTTTATAGTTAACGTGTCCTAACCGAGCATTCCATAAGGAGAAGACAGAG
>Marker613915
TGATCCTTCATGCGCTGCTGATCGAGTTGTTGGTGATGTAGTTCCTCCACGTTATAATCCTGGTGGCACTGCCAGTCACTCTATTGCACCTACCAAGGTAXXXXXXXXXXGCTATGTCCTCTAGTGTGAGCAATTTGTCAAAAACTAGTTGGTGAGCGCAGATGATATCGAGGGCGATCAACTGGGGAGGAGTGGTGGGCTCTAAACGTG
TGATCCTTCATGCGCTGCTGATCGAGTTGTTGGTGATGTAGTTCCTCCACGTTATAATCCTGGTAGCGCTGCTAGTCACTCTATTGCACCTACCAAGGTAXXXXXXXXXXGCTATGTCCTCTGGTGTGAGCAATTTGTCAAAAACTAGTTGGTGAGCGCAGATGATATCGAGGGCGATCAACTGGGGAGGAGTGGTGGGCTCTAAACGTG
>Marker613985
ATGTGGCAGTCACATAGAGAAGACTACCAATCAGCTGCTTATATTCAGTAGGACTCACCTAAAAACCATCTCCTCCTTTTGACATTTTAACTCCAGGCACXXXXXXXXXXAGATCTCATTTCTTCCTTGAACTTGTTTAACATATCTGACCAGCTGCTTGGATACATTAGGTCGTCAACATACAAGCTTACCATGAGAAAGTCCTCCTCT
ATGTGGCAGTCACATACAGAAGACTACCAATCAACTGCTTATATTCAGTAGGACTCACCTGAAAACCATCTCCTCCTTTTGACATTTTAACTCCAGGCACXXXXXXXXXXAGATCTCATTTCTTCCTTGAACTTGTTTAACATATCTGAGCAGCTGCTTGGATACATTAGGTCATCAACATACAAGCTTACCATGAGAAAGTCCTCCTCT
>Marker613987
TTCAAAGAGCTTAACATGAATGGTAGTGTGGTAGGTGAAGAAAGGAAGTTTCAACTTTGAGAGCTAGAGGAGCTACTGTATGATGCATATGAAAGCTTGAXXXXXXXXXXCTTGAAGCTTTACAAAGAGTGGACCAAGAAAGCTCATGATGCTCGCCTCAACACTCTCAAGGAATTCAAGAAAGGAGACCAAGTCCTACTTTACAACTTG
TTCAAAGAGCTTAACATGAATGGTAGTGTGGTAGGTGAAGAAAGGAAGTTTCAACTTTGAGAGCTAGAGGAGCTACTGTATGATGCATATGAAAGCTCGAXXXXXXXXXXCTCGAAGCTTTACAAAGAGTGGACTAAGAAAGCTCCTGATGCTCGCCTCAACACTCTCAAGGAATTCAAGAAAGGAGACCAAGTCCTACTTTACAACTTG
>Marker613990
TCGCATTGTTTTTCTAGATGGAAATTCGATAACATGCATGCCCGGTCACATCAAGTTTGAGACTCCGTGCTACTTTAAACACATCAAAGTAACTCTAAAGXXXXXXXXXXTCGATAACATGCATGCCCGGTCACATCAAGTTTGAGACTCCGTGCTACTTTAAACACATCAAAGTAACTCTAAAGAATGAATCAATAGACTTTGATCACA
TCGCATTGTTTTTCTAGATGTAAATTCGATAACATGCATGCCCGGTCACATCAAGTTTGAGACTCCGTGCTACTTTAAACACATCAAAGTAACTCTAAAGXXXXXXXXXXTCGATAACATGCATGCCCGGTCACATCAAGTTTGAGACTCCGTGCTACTTTAAACACATCAAAGTAACTCTAAAGAATGAATCAATAGACTTTGATCACA
>Marker614018
ATGTTCCCCAGATTGACTAGGTATCTTCCTCTTTCTGACATCTTGTTTAACATCCCTCTCTTCCTGACGTGCACGCTCAACCCTCTCCACCCGCAATCAGXXXXXXXXXXTTAGGTGTTTCGTGCATTTCTAATTTTTATCTTCATTTAATGTCTCAGAACCGTTTGGGGTCCATTTGATGTCATTTTGAGTGTTTTTAATAGATTTCAG
ATGTTCCCCAGATTGACTAGGTATCTTCCTCTTTCTGACATCTTGTTTAACATCCCTCTCTTCCTGACGTGCACGCTCAACCCTCTCCACCCGCAATCAGXXXXXXXXXXTTAGGTGTTTCGTGCATTTCTAACTTTTATCTTCATTTAATGTCTCAGAACCGTTTGGGGTCCATTTGATGTCATTTTGAGTGTTTTTAATAGATTTCAG
>Marker614058
AGGAGGACATTCCATACCCAATTCATCCATCTTCAGTGTAGTTTTCATTGGGGCATTTCATCGAGCACTTGGCGTGAATTTCGAAACTTACTTAGTCGACXXXXXXXXXXGCATCATGTCATATGAGTAATTAGTAGTGAATTAGGTGTGACCATGCATCTTCACTTAGGTGAAAGATTAAGAATACATGGAAACTTGAATACCAAATGA
AGGAGGACATTCCATACCCAATTCATCCATCTTCAGTGTAGTTTTCATTGGGGCATTTCATCGAGCACTTGGCGTGAATTTCGAAACTTACTTAGTCGACXXXXXXXXXXGCATCATGTCATATGAGTAATTAGCAGTGAATTCGGTGTGACCATGCATCTTCACTTAGGTGAAAGATTAGGAATACATGGAAACTTGAATACCGAATGA
>Marker614113
ATTAGTGGCATGTAACTCGGTCGAGTCTAGGAGTCAAAGTTACTAAGTTTTGAAAATGCAGGATTATTTAGCCTCCGTTGTTCATTGTTGATGTTTATGTXXXXXXXXXXGCTAGTTTGAAGGTCTTGGTTGATTTTAATCCTTGCATAATGTTGTTTGGAAGTAGTAACTTATCTCCATATTAGAGTAGACCGAGTCATTCACCACTTT
ATTAGTGGCATGTAACTCGGTCGAGTCTAGGAGTCAAAGTTACTAAGTTTTGAAAATGCAGGATTATTTAGTCTCCGTTGTTCATTGTTGATGTTTATGTXXXXXXXXXXGCTAGTTTGAAGGTCTTGGTTGATTTTAATCCTTGCATAATGTTGTTTGGAAGTAGTAACTTAACTCCATATTAGAGTAGACCGAGTCATTCACCACTTT
>Marker614116
ATAGCGGCGAACGACTTGGTCTACTCTAACATGGAGCTAAGCTACTAACATAACCAAAACTATGCAAGGATCCAACTTTCTAAATGAGCTAAAACTAGCTXXXXXXXXXXTTATACTTCACAAGATTAAGAGAGACAGTATAATCCCTACAATTACATAATATACCAACTTTATTGACTCCTAGACTCGATCGAGTCACATGCCACAAAT
ATAGCGGCGAACGACTTGGTCTACTCTAACATGGAGCTAAGCTACTAACATAACCAAAACTATGCAAGGATCCAACTTTCTAAATGAGCTCAAACTAGCTXXXXXXXXXXTTATACTTCACAAGATTAAGAGAGACTATATAATCCCTACAATTACATAATATACCAACTTTATTGACTCCTAGACTCGATCGAGTTACATGCCACAAAT
>Marker614161
TTGGAGGAGCCTCTTTATCCGGTTCAGACGACGAGAAAAGAACATAGCCACGACGAAACCTGGACGTAGTGCTTGACCCTGAATTATAGCACAATAGAAAXXXXXXXXXXTGCGAATGTGAGTGTATGAGCAACCACTCGCTCTCTAGAAATTCAGGGGTTCGGTGGAGATTACGTGCAACATGTTCTTTAGTTCGTTACTAATAATCCG
TTGGAGGAGCCTCTTTATCCTGTTCAGACGACGAGAAAAGAACATAGCCACGACGAAACCTGGACGTAGTGGTTGACCCTGAATTATAGCACAATAGAAAXXXXXXXXXXTGCGAATGTGAGTGTATGAGCAACCACTCGCTCTCTAGAAATTCAGGGGTTCGGTGGAGATTACGTGCAACATGTTCTTTAGTTCGTTACTAATAATCCG
>Marker614239
CTTATATTGTGCAGTCTTGCAACCTTTATTTTAGCTTTTAGTTTATAGAAATTTCATTTTCTTTTTGATTGATTAATTCTCGTGGCACATAAACCATAAAXXXXXXXXXXAAATTCGTTAACTAGGTTTTATTTGAGACGAGTAAAATTCGTTCATCATTGCCGTCCTCCTCAAGCATATATGTGCCGTTGATTCTCATAACCAGCAAAA
CTCATATTGTGCAGTCTTGCAACCTTTATTTTAGCTTTTAGTTTATAGAAATTTCATTTTCTTTTTGATTGATTAATTCTCGTGGCACCTAAACCATAAAXXXXXXXXXXAAATTCGTTAACTAGGTTTTATTTGAGACGAGTAAAATTCGTTCATCATTGCCGTCCTCCTCAAGCATATATGTGCCGTTGATTCTCATAACCAGCAAAA
>Marker614253
TTTACGTCCTATTTTGACTTTTTAAAAAAGTTCACTTGTTTGTTGAGCAATTTAGGGATGCATTGAGGATTATGGATTTTCTATGCTTTGTTAAGTAGTTXXXXXXXXXXAGGATGTTCTATGCATTTTAAGCTTTTATCTCGATTTAGTGTCTCAGACCCGATCGGGGTCCATTTGATGTTGTTTTGGAGTGTTTTTTATAGACTTCAG
TTTACGTCCTATTTTGACTTTTTAAAAAAGTTCACTTGTTTGTTGAGCAATTTAGGGATGCATTGAGGATTATGGATTTTCTATGCTTTGTTAAGTAGTTXXXXXXXXXXAGGATGTTCTATGCATTTTAAGCTTTTATCTCGATTTAGTGTCTCAGACCCGATCGGGGTCCATTTGATGTTGTTTTGGAGTGTTTTTGATAGACTTCAA
>Marker614269
GCTGAGCAGTGGTCAGAACCACACCTTCAGCAGGCTCTCTAAAACCATCTTCAACAACCGTCCAATACTCCTTGGATCGCAGTAGATTTTCCATTAGTAGXXXXXXXXXXAGTTTGTTATAGGCTCTGATACCACATGATGAGGCATGAGATATGCAAACTGACAACTGAATTAGTTGCAGAGATTTCATTGAAATAGACTTGATCATGA
GCTGAGCAGTGGTCAGAACCACACCTTCAGCAGGCTCTGTGAAACCATCTTCAACAACCGTCCAATACTCCTTGGATCGCAGTAGATTTTCCATTAGTATXXXXXXXXXXAGTTTGTTATAGGCTCTGATACCACATGATGAGGCATGAGATATGCAAACTGACAACTGAATTAGTTGTAGAGATTTCATTGAAATAGACTTGATCATGA
>Marker614339
CACTTTCCGAAAAGAGTATTTCCACCCTACAAGCCTTGGGTATCAAGAAATCCCTTCCGAGGATAAGACCGTCTCCACTCAAGTTTTTAGGCTTTAGATAXXXXXXXXXXAGAGTTTGAATCAAACGAAAGGGTGTATGCCCATTTGTCCTAGGGGAGAGAGTTATCACTCCAACTACCTAGCTCCCTATCATCAGTCTAGCTCAGCTCA
CACTTTCCGAAAAGAGTATTTCCACCCTACAAGCCTTGGGTATCAAGAAATCCCTTCCGAGGATAAGACCGTCTCCACTCAAGTTTTTAGGCTTTAGATAXXXXXXXXXXAGAGTTTGAATCAAACGAAAGGGTGTATGCCCATTTGTCCTAGGGGAGAGAGTTATCACTCCAACTACCTAGCTCCCTATCGTCAGTCTAGCTCAGCTCA
>Marker614370
TCAAGAATCAAAGAAGAAACGTTTTTCAGCATCACAGACCCGCAATGGTTAACAACTAAGGGAAGAGAGAAACGATTACCTTCTAGAATCCGACCTGACTXXXXXXXXXXTCTCCTTAAATAAAAGGTTCATCACTCCCGTGGAAGGACTCCAATCACGGTCATGATGAACATCCCATCACACCCATGACCGACTGTCAGCCACGTATGT
TCAAGAATCAAAGAAGAAACGTTTTTCAGCATCACAAACCCGTAATGGTTAACAACTAAGGGAAGAGAGAAACGATTACCTTCTAGAATCCGACCTGACTXXXXXXXXXXTCTCCTTAAATAAAAGGTTCATCACTCCCGTGGCAGGACTCCAATCACGATCATGATGAACATCCCATCACACCCATGACCGACTGTCAGCCATGTATGT
>Marker615065
TGTATTTAAAAGTGGATGGGTTGGTTTGGGTAGCGGGTGAATCACCAAACCAATTCATCGTGATTATATCTTTGATATTCAAACAATAATATTTTTATTTXXXXXXXXXXGTTAAGGATGATCTGTATATTGTAAAGGATTTGTTTGGGTATGGTTACAGGATAAGAAATTTCATTGAAAGTTATGGTGCGGTAGCTGTTGCGAAGCGAG
TGTATTTAAAAGTGGATGGGTTGGTTTGGGTAGCGGGTGAATCACCAAACCAATTCATCGTGATTATATCTTTGATATTCAAACAATAATGTTTTTATTTXXXXXXXXXXGTTAAGGATGATCTGTATATTGTAAAGGATTTGTTTGGGTATGGTTACAGGATAAGAAATTTCATTGAAAGTTATGGTGCGGTAGCTGTTGCGAAGCGAG
>Marker616323
CAGATCATGTAAGTTGGGTGTGACAGTGGGACGTGAGGCGGCGAGGAGGAGGGGCTAGAGAGGAGTCTCCGTTGCAGGAGGCGGAGAGGGAGACTGCGATXXXXXXXXXXGGACGGCTACTGACTGTATTGAAATCAAATTACAAGATAGAGCGCGCGCTAATTCTGCCAACAATAAACAAAAGTTCTGAAATTCGAAGCAGAAGACAGG
CAGATCATGTAAGTTGGGTGTGACAGTGGGACGTGAGGCGGCGAGGAGGAGGAGGAGCTAGAGAGGAGTCTCCGTTGCAGGAGGCGGAGAGGGAGACTGTXXXXXXXXXXGGACGGCTACTGACTGTATTGAAATCAAATTACAAGATAGAGCGCGCGCTAATTCTGCCAACAATAAACAAAAGTTCTGAAATTCGAAGCAGAAGATAGG
>Marker616362
AAATGTGGAGAAACTGCTTCCTTCCATGCATACAACGTCTCACAGACTAACTCAGCAGAACCCGTAGTCGTTGCCCTTGATAAGCTGCATTGCTTCTCGCXXXXXXXXXXGATAGAGGAGCTTGCGATGCTCTGCGGGGGAGAAGTGCGAGAGGAGGAAGGAGGAAGCTAGACCAGTGGAGACGAGAGTTTTGCCGAGGGAGGTGTTGGA
AAATGTGGAGAAACTGCTTCCTTCCATGCATACAACGTCTCACAGACTAACTCAGCAGAACCCGTAGTCGTTGCCCTTGATAAGCTGCATTCCTTCTCGCXXXXXXXXXXGATAGAGGAGCTTGCGATGCTCTGCGGGGGAGAAGTGCGAGAGGAGGAAGGAGGAAGCTAGACCAGTGGAGACGAGAGTTTTGCCGAGGGAGGTGTTGGA
>Marker616433
ATGTCTCTGCATCTTGGTTAATTTGCATATGAAGCTTAGGAGGAAAAAAACAATCCTAGAAAGTCATTTATGTATAATATATAATGTGGCGTGACATCAAXXXXXXXXXXGCAGCGTAGCCCAATTCTCTAGCAAGCTCAATCTGGAATCACATTAAACAAGTGACCACATCAAAGACTTCAGGAATTTGACTTCTTACATGGTCAATGT
ATGTCTCTGCATCTTGGTTAATTTGCATATGAAGCTTAGGAGAAAAAAAACAATCCTAGAAAGTCATTTATGTATACTATATAATGTGGCGTGACATCAAXXXXXXXXXXGCAGCGTAGCCCAATTCTCTAGCAAGCTCAATCTGGAATCACATTAGACAAGTGAGCACATCAAAGACTTCAGGAATTTGACTTCTTACATGGTCAATGT
>Marker616989
AAAAACCCTCCGATCTGCACACTCAGCTCTCCTTATTATTCCTGGTGTAAAGCGCAACTTGGGAAGTCGATGCAGCTTGTATTTATTGCTGCCTGAGCCTXXXXXXXXXXCATAGGTAGGGTATAGGAAATCTAATATTCGTCCCGAAAACCTAAAATATCTCGAATTCTATCTCGAATTCTCTCGAATTCTTTATTTTCGCTTCTTGGG
AAAAACCCTCCGATCTGCACACTCAGCTCTCCTTATTATTCCTGGTGTAAAGCGCAACTTGGGAAGTCGATGCAGCTTGTATTTATTGCTGCCTGAGCCTXXXXXXXXXXCATAGGTATGGTATAGGAAATCTAATATTCGTCCCGAAAACCTAAAATATCTCGAATTCTATCTCGAATTCTCTCGAATTCTTTATTTTCGCTTCTTGGG
>Marker619274
TTTGTAAGCCACACATATTCTTTACGTTTACAACCTTAAATTACCGAGGAATCTATGCATTCCATTCTGTATTTGAATTCGATTTGACCTAACTTTTAGTXXXXXXXXXXCAGCCACCTCCGCCGCTGCATCTCCACCACCACGCTGCGGAGCTCGTGGATGGACTCAAAGCAGTAACCCAGAATCTTGAATATGGAACAACGGATGTGA
TTTGTAAGCCACACATATTCTTTACGTTTACAACCTTAAATTACCGAGGAATCTATGCATCCCATTCTGTATTTGAATTCGATTTGACCTAACTTTTAGTXXXXXXXXXXCAGCCACCTCCGCCGCTGCATCTCCACCACCACGCTGCGGAGCTCGTGGATGGACTCAAAGCAGTAACCCAGAATCTTGAATATGGAACAACGGATGTGA
>Marker619326
AAGTTGTGTTCAACGTCAGCACACCAGGAAAACAAAGGACAAAAGGAGAAAGTGTTGTTATAGCTACTGATAGAGTTTTGAGTGTTTGCTGCTGACCTTCXXXXXXXXXXATCAATGGGTCATGATTGGATCACCCGCAACTTATACGGTTATTCAAAATGCAGGTTGGAATTTCCAATAGGGCAGCAGTTAAACTTTTCTATCAAACTG
AAGTTGTGTTCAACGTCAGCACACCAGGAAATCAAAGGACAAAAGGAGAAAGTGTTGTTATAGCTACTGATAAGAGTTTTGAGTGTTTGCTGCTGACCTTXXXXXXXXXXATCAATGGTTCATGATTGGATCATCCACAACTTATACGGTTATTCAAAATGCAGGTTGGAATTTCCAATAGGGCAGCAGTTAAACTTTTCTATCAAACTG
>Marker619376
TTGTTTGGTTCATTCAACAGTCTGGATCCAGCTTTCAGAATGCTCAGTTCCCAAGTAATAATACGACATTGCTGGAGGAAGCTTGCAGTATGACAATTGCXXXXXXXXXXTCTCCCTTACGAACCTACAACAAGCAAGATAACTCATTTTGAGGGACAGTGTGAAACAAGATACGAGATTACGGTAAACCATTTACATTTCAGACAAACA
TTGTTTGGTTCATTCAACAGTCTGGATCCAGCTTTCAGAATGCTCAGTTCCCAAGTAATATACGACATTGCTGGAGGAAGCTTGCAGTATGACAATTGCCXXXXXXXXXXTCTCCCTTACGAACCTACAACAAGCAAGATAACTCATTTTGAGGGACAGTGTGAAACAAGATACGAGATTACGGTAAACCATTTACATTTCAGACAAACA
>Marker619473
TGTTTCATCAATTTACAGGAACATTTTAGACAAAATTCCAAAACTCCACTTCTTTATCTCATGAAGGCTATGGATGGTTTACTATAGGTGCCAAGTATTAXXXXXXXXXXATAATATTAAAGAGTGATGATCTAAACATTGAAATCTGAACAGAGAACTTAAACCCAGGACCGGGATACTGACCAACTGTATCTTACGAGAACGTGTTTG
TGTTTCATCAATTTACAGGAACATTTTAGACAAAATTCCAAAACTCCACTTCTTCATCTCATGAAGGCTATGGATGGTTTACTATAGGTGCCAAGTATTAXXXXXXXXXXATAATATTAAAGAGTGATGATCTAAACATTGAAATCTGAACAGAGAACTTAAACCCAGGACCACGATACTGACCAACTGTATCTTACGAGAACGTGTTTG
>Marker619502
ATCGTCTTCTTCTTTGCCGTCCGCGCCGATTGGTGCGGCGAACTGGAAGAGAGCCGAGGCGGCGGCACAGCTGATCATTGCGCAGGTGCAGCCGACTCTCXXXXXXXXXXTATGCGGATTTATGAATCCTCGTGAATGCATCTATGGAGCATTAGGCAACTGAAAGCATCTAGTTAGTAAAGGAATTAGTTTTGTGATGGACTTTGAAAG
ATCGTCTTCTTCTTTGCCGTCCGCGCCGATTGGTGCGGCGAACTGGAAGAGAGCCGAGGCGGCGGCACAGCTGATCATTGCGCAGGTGCAGCCGACTCTCXXXXXXXXXXTATGCGGATTTATGAATCCTCGTGAATGCATCTATGGAGCATTAGGCGACTGAAAGCATCTAGTTAGTAAAGGAATTGGTTTTGTGATGGACTTTGAAAG
>Marker621882
ACTCATAAGTCATAATATACATTTGTCCCACCCCCACCAACAATATTCTGCTCTTTCATTGTCAAGTATTTTGAAGGCGTATATTTTTGTTTTCTAATTGXXXXXXXXXXTCACAAATGTATCGATGATTAATACTATCTATCAACGTTATTTTAACAAATAATTTTTTTATTAAGAACATATTAGTCCATTTATATGAAAATAATGAAT
ACTCATAAGTCATAATATACATTTGTCCCACCCCCACCAACAATATTCTGCTCTTTCATTGTCAAGTATTTTGAAGGCGTATATTTTTGTTTTCTAATTGXXXXXXXXXXTCACAAATGTATCGATGATTAATACTATCTATCAACGTTATTTTAACAAATAATTTTTTTATTAAAAACATATTAGTCCATTTATATGAAAATAAAGAAT
>Marker625037
ATTCATCCATTTCATCGAAAATCATAATAAAAAAAATTGCAATGGACTCTTCAGGTTGCTTATCAATGAAAAACCGCGTCATCAAAATATTGGACGAGATXXXXXXXXXXTAGTGACCAAGTGCACTTTATCGTCACTATATTATATCTTTATCTTCAATCTCATCACCATTTTCACCAAAATTTTTATCTTCACCTCTCTTCACAAACA
ATTCATCCATTTCATCGAAAATCATAATAAAAAAAATTGCAATGGACTCTTCAGGTTGCTTATCAATGAAAAACCGCGTCATCAAAATATTGGACGAGATXXXXXXXXXXTAGTGACCAAGTGCACTTTATCGTCACTATATTATATCTTTATCTTCAATCTCATCACCATTTTCACCAAAAATTTTATCTTCACCTCTCTTCACAAACA
>Marker628130
TAATTTCCCATCTCCACCTAGTAGCTTCTCCAACCAAATTACGAAGGCAAAGTGTTCAACCAATAGCTTCAGCCACTAAGCCCGTGTTCCCCAACAACCTXXXXXXXXXXTATGATTCCCAGTCAATCGATGCTTCCTAGGCATGTTCTACCTCCAACGTATAAAATCCGAGACCGGCGTCAGATCTCCAAAGAAATCTGAGATCGGAAC
TAATTTCCCATCTCCACCTAGTAGCTTCTCCAACCAAATTACGAAGGCAAAGTGTTCAACCAATAGCTTCAGCCACTAAGCCCGTGTTCCCCAACAACCTXXXXXXXXXXTATGATTCCCAGTCAATTGATGCTTCCTAGGCATGTTCTACCTCCAACGTCTAAAATCCGAGACCGGCGTCAGGTCTCCAAAGAAATCTGAGATCGGAAC
>Marker628276
CGACCACTCTGTTTCCGGATCTGACCTTGCATTGGACCTCCATGGTTACGGATTAAGTCCTCTCCACCAACCCGCTGACTAGCTTCTCATTCCGGTGAGGXXXXXXXXXXAGGAGGCGGCGGAGTCGGATTGAAGATCCGCCAAGAAGGATGAGATTTGGGTTGTTTTCAATATGTAATTATGTATTTTCAAAAGAAATGACCCATAAAC
CGACCACTCTGTTTCCGGATCTGACCTTGCATTGGACCTCCATGGTTACGGATTAAGTCCTCTCCAGCAACCCGCTGACTAGCTTCTCATTCCGGTGAGGXXXXXXXXXXAGGAGGCGGCGGAGTCGGATTGAAGATCCGCCGAGAAGGATGAGATTTGGTTTTTTTTCAATATTTAATTATGTATTTTTAAAAGAAATGACACATAAAC
>Marker628716
TCAAATTAAACCCTAGGTGTCACACACTCACTCACATCCTTTTTGCAGGCGACACCATCTCTTTGGGGATGCAACGGTCTTGGAAGCTAGCAGTATCATCXXXXXXXXXXCGGCATGCATTCTAAGTCGAATGAAACATATGGGAAAATCCTGGCAAACCCTCGCCCTATCCCATGCGGAGAAAGAAACCCTTCTCAAAACAGTCATCTA
TCAAATTAAACCCTAGGTGTCACACACTCACCCACATCCTTTTTGCAGGCGACACCATACTCTTTGGGGATGCAACGGTCTTGGAAGCTAGCAGTATCATXXXXXXXXXXCGCCATGCATTCTAAGTCGAATGAAACATATGGGACAATCCTGACAAACCCTCGCCCTATCCCATGCGGAGAAAGAAACCCTTCTCAAAACAGTCATCCA
>Marker629349
ATTGGATTCGTTTATCTGCTGGCGCAGATAGATATTGTTATCCGTAGAACAGCAAAATTGCTGTCAACTTACATCAATATGACTTACCATCTTCAATGGGXXXXXXXXXXCTTTATTTAAAACAACAATAATTTTTTGTAATTTGGATTAAAAATGTGTTCTATAATAATTTTAACATATATTCGTGACTATATATTCATTATAGGAGGT
ATTGGATTCGTTTATCTGCTGGCGCAGATAGATATTGTTATCCGTAGAACAGCAAAATTGCTGCCAACTGACATCAATATGACTTACCATCTTCAATGGGXXXXXXXXXXCTTTATTTAAAACAACAATAAATTTTTGTAATTTTGATTAAAAATGTGTTCTATAATAATTTTAACATATATTCGTGACTATATATTCATTATAGGAGGT
>Marker631013
CTTTTATTGAGGAGTCCAGATCCTCTGCAAGTCGCTTGAATGGCTTCCAGTTTGGTTAGTGTTTTTGTTGCATTGGGATCATTCTTATCAACCTGCAGATXXXXXXXXXXAATACATAATTAAAGGTTGCTAGTTTGAGTGGAGTAAAGAGATGAACTCTACCTTGGACTTCAGCATACAAGAGAAGTCGTAGAAAGCACCATAAACATC
CTTTTATTGAGGAGTCCAGATCCTCTGCAAGTCGCTTGAATGGCTTCCAGTTTGGTTAGTGTTTTTGTTGCATTGGGATCATTCTTATCAACCTGCAGATXXXXXXXXXXAATACATAATTAAAGGTTGCTAGTTTGAGTGGAGTAAAGAGATGAACTCTACCTTGGACTTCAGCATACAAGAGAAGTCATAGAAAGCACCATAAACATC
>Marker631230
CAAGGTATAAGGTTATTATGCATAAGAAAATAGGCAGTGGCTCTCAAAAGCCATCAAACATGGACAGGTGGACAGTTGAACTGTAGAAGCCTTGAAGGCTXXXXXXXXXXTCACTCATAGATTCTTAGTATCCATAATACAAGGATTTCCCTCTACATATTGATCATACACACACAAAAAAAGTTCTCTTCTTGGAAAACCTTTCAGCGT
CAAGGTATAAGGTTATTATGCATAAGAAAATAGGCAGTGGCTCTCAAAAGCCATCAAACATGGACAGGTGGACAGTTGAACTATAGAAGCCTTGAAGGCTXXXXXXXXXXTCACTCATAGATTCTTAGTATCCATAATACAAGGATTTCCCTCTACATATTGATCATACACACACAAAAAAAGTTCTCTTCTTGGAAAACCTTTCAGCGT
>Marker632780
CAAGTTGAATCTCCATTCGCCGAAAACCCTAAACTCTCTCAAGTGTCCAGATTTCGGCTCCCTCTTTCGGATTTCAGGATGGTAGGTCTCTTCCCCCTTTXXXXXXXXXXTTTTTTTTATACTTGAATGCTATGTGATTTGTTTGGATTATCTTTTAAGCATTAAGATTCTCGATAAATTCGTCTGTCCTAGCTTCTCACTCGATTTGTT
CAAGTTGAATCTCCATTCGCCGAAAACCCTAAACTCTCTCAACTGTCCAGATTTCGGCTCCCTCTTTCGGATTTCAGGATGGTAGGTCTCTTCCCCCTTTXXXXXXXXXXTTTTTTTTATACTTGAATGCTATGTGATTTGTTTGGATTATCTTTTAAGCATTAAGATCCTCGATAAATTCGTCTGTCCTAGCTTCTCACTCGATTTGTT
>Marker633790
TAATGCCGTTCGATTACCATAGGAAGCAAGAAGCTCATACACGTGAAGCTGCTGCCGGCGGAGGCGCGTGGTTTGGACGCGCTCATTGACTGACAGATATXXXXXXXXXXGCTACCCAGCGAAAGTCGCGCTCCCTCTCTCTCCCACTCTTCTCTCTCTCTCTGACTGCCGCGTTCGGCTTGGGAAATGTAAAATATTATTATCGAAGTG
TAATGCCGTTCGATTACCATGAGAAGCAAGAAGCTCATACACGTGAAGCTGCTGCCGGCGGAGGCGCGTGGTTTGGACGCGCTCATTGACGGACAGATATXXXXXXXXXXGCTACCCAGCGAAAGTCGCGCTCCCTCTCTCTCTCTCTCTCTTCTCTCTCTCTGACTGCCGCATTCGGTTTGGGAAATGTAAAATATTATTATCGAAGTG
>Marker633956
CACATTAACATAAAGGTGCTGAGATTCGGGATGATGGGTTCCGCGATAGGGTCGGTTCTCGGGTGCGTGTTCTTGGTGTTGTCGATGGTGAATGTGATTGXXXXXXXXXXTTTTGCTGGTTTCGTCTGCGCTCTTGTGTTATATATCCACTGCTGTCTATGCTTTCTTGCACTGAATATATTTTTTTTTCTGGGGGGGAGGGTGTGTTAT
CACATTAACATAAAGGTGCTGAGATTCGGGATGATGGGTTCCGCGATAGGGTCGGTTCTCGGGTGCGTGTTCTTGGTGTTGTCGATGGTGAATGTGATTGXXXXXXXXXXTTTTGCTGGTTTCGTCTGCGCTCTTGTGTTATATATCCACTGCTGTCTATGCTTTCTTGCACTGAATATTTTTTTTTTTCTGGCGGGGAGGGTGTGTTAT
>Marker640396
TCTCTGGTCACCACCTCCTCTTTCCTTATCCTAGTCTTCTCAACCATCTTGTATGTCTCCCTTCGCCCTGCAGTCAATTTCTACTAGCCATTAGGTCATGXXXXXXXXXXCAGGAGGAGCAAAAGACGCAACAGAGAATAGAGGCGAAGGTTATTATTATAAGTTAAAAGATAAAGGGACTCAAAACCCTACCTCCAGACCGTAAATTTG
TCTCTGGTCACCACCTCCTCTTTCCTTATCCTAGTCTTCTCAACCATCTTGTATGTCTCCCTTCGCTCTGCAGTCAATTTCTACTAGCCATTAGGTCATGXXXXXXXXXXCAGGAGGAGCAAAAGACGCAACAGAGAATAGAGGCGAAGGTTATTATTATAAGTTAAAAGATAAAGGGACTCAAAACCCTACCTCCAGACCGTAAATTGG
>Marker641522
CATTGATCGGCTCGCTTCCAACCGGTTTATACCCCAATCGTTTAATTCGGACGGTCCAACCAATCCGCATACCAGTGAAATGACATGTTGATGATGGATCXXXXXXXXXXATAACGGTTATATAAAACAAACAACAGGTAAAGAGTCATAACTCACATCACTCTTTCTCCCCAATTGTTAGCACGCAAAAGGTCATCCTGACATAAGACG
CATTGATCGGCTCGCTTCCAACCGGTTTATACCCCAATCGTTTAATTCGGACGGTCCAACCAATCCGCATACCAGTGAAATGACACGTTGATGATGGATCXXXXXXXXXXACAACGGTTATATAAAACAAACAACAGGTAGAAAGTCATAACTCACAGCACTCTTTCTCCCCAATTGTTAACACGCAAAAGGTCATCCTGACATAAGAGG
>Marker641610
ACTGAATCTGTCAGCCATTTTTATCGTCCCTTGTGTCTGGAATTTTTGGGGCTGAGAACCAGAGACGACCTCTCCTTCCTTCCATGCAAGCCATTATTTTXXXXXXXXXXGATATTATTATGTATGTCCCATAAATCAATGTCCCATATTATTACGTTGGGTCGGGATTCCTCGTATAAAAAGAAAAAAAAAACATTAGCCAGATAATTA
ACTGAATCTGTCAGCCATTTTTATCGTCCCTTGTGTTTGGAATTTTTGGGGCTGAGAACCAGAGACGACCTCTCCTTCCTTCCACGCAAGCCATTATTTTXXXXXXXXXXGATATTATTATGTATGTCCCATAAATCAATGTCCCATATTATTACGTTGGGTCGGGATTCTTCGTATAAAAAGAACAAAAAAACACTAGCCAGATAATTA
>Marker643398
ACTGATATACTATTCTACGTGCTGCTCGAACAAAAGGAATGGATAGCACGTACGCAACATTAAATAAAAATATGTGGATATAACTATCCTCGCAATTTCGXXXXXXXXXXTGACCACTAGACTTATTCTGAACGAGGAATTTATCTTCACATTTATAGCAAAAACTCAAATGAATACAGCCAGAAAGCAAATGCATGATCGCTTCAGAAG
ACTGATATACTATTCTACGTGCTGCTCGAACAAAAGGAATGGATAGCACGAATGCAACATTAAATAAAAATATGTGGATATAACTATCCTCGCAATTTCGXXXXXXXXXXTGACCACTAGACTTATTCTGAACGAGGAATTTATCTTCACATTTATAGCAAAAACTCAAATGAATACAGCCAGAAAGCAAATGCATGATCGCTTCAGAAG
>Marker643556
CTGTGTATGTCTTGGGACAAATGGCGTCATCCCCCGTGTCAATATGGCATCGTGTGATGAACGTATTATTCGAATCTTCAATGTCGATCCCATCATTGTTXXXXXXXXXXGGCATTCATTTGTTGAAGATAACATCCAAATTTCTCAAAACGGAACTGGTAGATCAGATGTCGCATTCAGAAACAATGAAGAATAGGAAAAGCTTCTCTA
CTGTGTATGTCTTGGGACAAATGGCGTCATCCCCCGTGTCAATATGGCATCGTGTGATGAACGTATTATTCGAATCTTCAATGTCGATCCCATCGTTGTTXXXXXXXXXXGGCATTCATTTGTTGAAGATAACATCCAAATTTCTCAAAACGGAACTGGTAGATCATATGTCGCATTCAGAAACAATGAAGAATAGAAAAAGCTTCTCTA
>Marker643640
TCAATACAAACGTCAAAACGCAGTGACGATTAATTTCTGCCGGAAATCTCGATATGAATGTTTAGGGATTGTTTGGTTCACTGATTTGTGAGTTCTGTGGXXXXXXXXXXCCTTATATTTAACGTGTGAGTAAATTCAAAAATTGTTATGTGTCGATAGGGGCATGATATAGATATTGAGAGGCGAATGCAACAAGAGTTCGCCAGCAAA
TCAATACAAACGTCAAAACGCAGTGACGATTAATTTCTGCCGGAAATCTCGATATGAATGTTTAGGGATTGTTTGGTTGACTGATTTGGGAGTTCTGTGGXXXXXXXXXXCCTTATATTTAATGTGTGAGTATATTCAAAAATCGTTATGTGCCGATACGGGCATGATATAGATATTGAGAGGCGAATGCAACAAGAGTTCGCCAGCAAA
>Marker643675
GACGAATGCGGCGGTGATGAAGCTGATAGAGAATTGGGAGACCTCTGTGATCATAGCAGGGGCAGCTATTTCCCACATGTTCTTCGACTCCACCCACCACXXXXXXXXXXGATCACACCAAGGGTGGATATTTGTATCAGTATTACTGTTTAATGGCGGAATTTGGAAAAGTAATTAGAGAAGGGAAAGCGAAGATTGTATTCTCTTCGT
GACGAATGCGGCGGTGATGAAGCTGATAGAGAATTGGGAGACCTCTGTGATCATAGCAGGGGCAGCTATTTCCCACATGTTCTTGGACTCCACCCACCACXXXXXXXXXXGATCACACCAAGGGTGGATATTTGTATCAGTATTACTGTTTAATGGCGGAATTTGGAAAAGTAATTAGAGAAGGGAAAGCGAAGATTGTATTCTCTTCGT
>Marker643847
TCATGTATCACCTCAGGGTTTTTAGTGAAGAGCTTTGGGAACTCATCCTTTGTAGCTAGAACTATCCCTGTGAATATTACTCCTATTACTGTTGATGTTGXXXXXXXXXXAGCTAACCTTATTGCTGCATTGAATCCCAAAGCAACCATCAAAGTCCAGAGCTGGATGTTCATGCTGAAATTACCACAGATGGTTCACAAATCAAAATCA
TCATGTATCACCTCAGGGTTTTTAGTGAAGAGCTTTGGGAACTCATCCTTTGTAGCTAGAACTATCCCTGTGAATATTACTCCTATTACTGTTGATGTTGXXXXXXXXXXAGCTAACCTTATTGCTGCATTGAATCCCAAAGCAACCATCAAAGTCCAGAGCTGGATGTTCATGCTGAAATTACCACAGATGGTTCACAAACCAAAATCA
>Marker643951
GAGAAGTGGCATGACTAAAAAAGTTCAAAGGTGCAAAAGCAAGCTAATGCAGCAACTAACAATTTCATCTTATCAAATAGTTTCCTGTTTTTACAGAGTGXXXXXXXXXXGAGCATGGAATCACTAAAAAGAGGGAAGAAGAAAATGAAACCTGACAAAAGCCACCACGGCAATGCCCATGTCCAGAGCACTGATTAATACACACACTTT
GAGAAGTGGCATGACTACAAAAGTTCAAAGGTGCAAAAGCAAGCTAATGCAGCAACTAACAATTTCTTCTTATCAAATAGTTTCCTGTTTTTTACAGAGTXXXXXXXXXXGAGCATGGAATCACTAAAAAGAGGGAAGAAGAAAATGAAACCTGACAAAAGCCACCACGGCAATGCCCATGTCCAGAGCACTGATTAATACACACACTTT
>Marker644072
CTTTTGGCTGGCTCTTTTTGTTGAAGGAACTCGTTTTACACAGGCAAAGCTCTTAGCTGCACAAGAGTATGCAGCATCGACTGGGTTGCCTGTCCCTAGAXXXXXXXXXXGAAGAGAAATATGTCTTAGGCGGATGTAGGAAAGAGAATGGGATGCCCCATATCCGACTTGCCTTCTCCATTCTGCAACTCCAGATTAGTGGTCAATAGA
CTTTTGGCTGGCTCTTTTTGTTGAAGGAACTCGTTTTACACAGGCAAAGCTCTTAGCTGCACAAGAGTATGCAGCATCGACTGGGTTGCCTGTCCCTAGAXXXXXXXXXXGAAGAGAAATATGTCTTAGGCGGATGTAGGAAAGAGAATGGGATGCCCCATATCCGACTTGCCTTCTCCATTCTGCAACTCCAGATTAGTGGTCAGTAGA
>Marker649545
ATCTGATAAATAATAATCATGGTCATCTTCACCGCCGATGATGATTATGTTGTTCCTCCATGATGAGCAAGTATGACTGTCTCGAGGGGACGGCGGGGAGXXXXXXXXXXGTGCATAAGCATAACATAATTTGTCATATCTGTAACATAGAGACGAGATAGCAGCCTAACAAAAGCCGAAATTCATATGACATATTCCCTTAACTAAATG
ATCTGATAAATAATAATCACGGTCATCTTCACCGCCGATGATGATTATGTTGTTCCTCCATGATGAGCAAGTATGACTGTCTCGAGGGGACGGCGGGGAGXXXXXXXXXXGTGCATAAGCATAACATAATTTGTCATATCTGTAACATAGAGACGAGATAGCAGCCTAACAAAAGCCGAAATTCATATGACATAGTCCCTTAACTAAATG
>Marker649596
AAAAACCCAAAAGGCTAGCGACTGTGTTTCTTCGATTGGAGAGTTCTTTCCTCATGCAGACGAAAAACCTTTTTTTAAGGAAACACGAAACTGGAAAAAGXXXXXXXXXXATAGTGTATATCGACTAACTCAAACACTCACAGACAATCTCAAACATTCTCAAACGAAGATCTAAAAAAGAAATCGAAGATCTTTAGAACTTCTGTGAAG
AAAAACCCAAAAGGGTAGCGACTGTGTTTCTTCGATTGGAGAGTTCTTTCCTCATGCAGACGAAAGACTTTTTTTTTAGGAAACACGAAACCGGACAAAGXXXXXXXXXXATAGTATATATCGACTAACTCAAACACTCACAGACAATCTCAAACACTCTCAAACGAAGATCCAAAGAAGAAATCGAAGATCTTTAGAGCTTCTGTGAAG
>Marker652083
ATGCGGTTAAATACATTAACTATTGCACTCTAATAATATGAGTTGTGGGGAGAATCATGGTTCAGATTGGTTTTTATATAATTCACCAACACGCCCTTCGXXXXXXXXXXATGTCCACATCATGAACGAGCTCGCAAGCGACACGTTGCTCGTGCACTGTCACTGCATCGACCACGACGATGGAGAGCACAACATCAACGTCGGGACTGA
ATGCGGTTAAATACATTAACTATTGCACTCTAATAATATGAGTTGTGGGGAGAATCATGGTTCAGATTGGTTTTTATATAATTCACCAACACGCCCTTCGXXXXXXXXXXATGTCCACATCATGAACGAGCTCGCAAGCGACACGTTGCTCGTGCACTGTCACTGCATCAACCACGACGATGGAGAGCACAACATCAACGTCGGGACTGA
>Marker654802
CATTTCTACACCTCAATAAGAATGTTCTTCTCCTCCCATATTATTGTTCTTCTTCCTGTTTGTTTTATAACATATTTCATTTATTTAAAAGTTTCTATTTXXXXXXXXXXATGTTAGAGTTAAGCGGTCAAGCATAGCTCCAACATTCCTACTTGAACTATCCATGACAGACATTCTTATAGCCAAGAAGGATAGTAAAAGGTTACCAGA
CATTTCTACACCTCAATAAGAATGTTCTTCCCCTCCCATATTATTGTTCTTCTTCCTATTTGTTTTATAACATATTTCATGTATTTAAAAATTTCTATTTXXXXXXXXXXATGTTAGAGTTAAGCGGTCAAGCATAGCTCCAACATTCCTGCTTGAACTATCCATGACAGACATTCTTATAGCCAAGAAGGATAGTAAAAGATTACCAGA
>Marker655206
AGGTTCGTCCCAGTTCCGCAATTGGCTGGCGATCAATTCTTCTACTGCATACCTTGAACAAGAAATTCCATCAGAGGCAGAGTCTCTGCATCCACAACTGXXXXXXXXXXTAACAGAAATGAATGATCCATAAAAAATTCTTACGGAAAGCTCGAATCTTTCTCCTGCCACCGTAATCAAGAAACACAGTGGGGTCCGAATCCTGAATCG
AGGTTCGTCCCGGTTCCGCAATTGGCTGGCGATCAATTCTTCTACTGCATACCTTGAACAGGAAATTCCATCAGAGGCAGAGTCTCTGCATCCACAACTAXXXXXXXXXXTAACAGAAATGAATGATCCATAAAAAATTCTTACGGAAAGCTCGAATCTTTCTCCTGCCACCGTAATCAAGAAACACAGTGGGGTCCGAATCCTGAATCG
>Marker655641
TTCTATGGTCTCTGGTTCAAATATTGATCTAGAAATCCCTAAACGATCCTAGATCTTGAGGCGCGTAAGATGGAAGTAGCTCTTATTTCCCAATTCATTGXXXXXXXXXXTCAAGGTAATTAGCTCTATGGCTAATCTCTTTGGGATTATGACGACATGATTGTTATGTCACAGATCTCAGTTGGTGTATACACAAAAAATGTGAAACAT
TTCTATGGTCTCTGGTTCAAATATTGATCTAGAAATCCCTAAACGATCCTAGATCTTGAGGCGCGTAAGATGGAAGTAGCTCTTATTTCCCAATTCATTGXXXXXXXXXXTCAAGGTAATTAGCTCTATGGCTAATCTCTTTGGGATTATGACGACATGATTGTTATGTCACAGATCTCAGTTGGTGTATACACAAAACATGTGAAACAT
>Marker656044
AGGGGAGTTAACGCAGTCACCAACTTCGACCTCAGCCGTTACATCCACTGCCTCCGCCCTAACGGAACTCAAACTCCCACCACATCTAACGGCGACACTAXXXXXXXXXXAGCAGCGGTGGTTCACCGTCGTCGTCATCCACGACGTCTGCGCTAGGGCTTCTGCTGCAATCCTCCAAGTTCAAGGAAATGCTGGAGAGAACTTCCAGAA
AGGGGAGTTAACGCAGTCACCAACTTCGACCTCAGCCGTTACATCCACTGCCTCCGCCCTAACGGAACTCAAACTCCCACCACCTCTAACGGCGACACTAXXXXXXXXXXAGCAGCGGCGGTTCACCGTCGTCGTCATCCACGACGTCTGCGCTAGGGCTTCTGCTGCAATCCTCCAAGTTCAAGGAAATGCTGGAGAGAACTTCCAGAA
>Marker656480
GGTATTTGGACTGACATAGAAAGTTACCAAAAGAGTTTTGAGTGATTTGTAATCCAAGAAAGTAGGATAATTCTCCTATCATACTCATTTCCAAAGACTCXXXXXXXXXXCCTAGAGAAACCTTTAGAGAAAAGGTAAGAACTTAGTTTGCCATACCATGCTATAGGAGCTTGTTTTAAACCATATAAAGCCTTTAAACAAATGATCACA
GGTATTTGGACTGACATAGAAAGTTACCAAAAGAGTTTTGAGTGATTTGTAATCCAAGAAAGTAGGATAATTCTCCTATCATACTCATTTCCAAAGACTCXXXXXXXXXXCCTAGAGAAACCTTTAGAGAAAAGGTAAGAACTTAGTTTGCCATACCATGCTATAGGAGCTTGTTTTAAACCATATAAAGCCTTTAAACACATGATCACA
>Marker657165
TTGACTGGCGCAATCAAGGCACCAGAAAGCACTGATCCTCAGTTCCAAACCTGGGATGAGCACGATAACCTAGTCAAAACACGAATAAGAATCTCAGAGCXXXXXXXXXXCAGCCAGGAAAACTTACTCAACTGTTGACAATTCGTCTGCTATGTTCAAAGCCGAACAACAGCTCTTCCACCTTCATTAGGGGGAGATGGATGTCACGGA
TTGACTGGCGCAATCAAGGCACCAGAAAGCACTGATCCTCAGTTCCAAACCTGGGATGAGCACAATAACCTAGTCAAAACACGAATAAGAATCTCAGAGCXXXXXXXXXXCAGCCAGGAAAACTTACTCAACTGTTGACAATTCGTCTGCTATGTTCAAAGCCGAACAACAGCTCTTCCACCTTCATTAGGGGGAGATGGATGTCACGGA
>Marker665429
ACACCTACAATAAGGTTGATATCTACTTTCTCATTGTAAGGGGTGTGATGAACGTCTAGAAACAGAGGGGAAGAAAGATGATAGAGGGGACACGCAAACAXXXXXXXXXXAGACGATAGTAAATTCAGTGACGACAATGATCAAGGTGGAGGCAATAATGGAGGAGATGGACCTAGTGATAATGATCCTGATAATGGGGCGTCATCGAAC
ACACCTACAATAAGGTTGATATCTACTTTCTCATTGTAAGGGGTGTGATGAACGTCTAGAAACAGAGGGGAAGAAAGATGATAGAGGGGACACGCAAACAXXXXXXXXXXAGACGATAGTAAATTCAGTGACGACAATGATCAAGGTGAAGGCAATAATGGAGGAGATGGACCTAGTGATAATGATCGTGATAATGGGGCGTCATCGAAT
>Marker668292
TTGTGATTTGTGAGAAGGCATGAGAGGGGAAATATAATATTATGATATGAAGTTATGGGAATTTGCGTTATATATTATTATTATGCATCGATCGATCGATXXXXXXXXXXAATCTAAATGAAGGACCTTCTGATATTCATGATTGATCTACTGGTCAACATTTTTACCAACTATATGCAGTGGCGAATACGAGACCTTTCTTTGGATTCC
TTGTGATTTGTGAGAAGGCATGAGAGGGGAAATATAATATTATGATATGAAGTTATGGGAATTTGCGTTATATATTATTATGCATCGATCGATCGATCATXXXXXXXXXXAATCTAAATGAAGGACCTTCTGATATTCATGATTGATCTACTGGTCAACATTTTTACCAACTATATGCAGTGGCGAATACGAGACCTTTCTTTGGATTCC
>Marker668557
GGATCGGCTGCATTTCCGCTCTATTCTTTACTAAGTGAAGTTTCCATGAGCATTGATCCTCAGTCTGATAAAACAGTGTCTTTCCTTCAGCAGTTAGTCAXXXXXXXXXXGGGGAGCGATGTTCGGCTTATGAGAAGCTTAGTTCGGTTATTTCCTCTGTAACTACTCCACTGGGATGGATGTATCAAGAACGATCGTTATATTCTGAAG
GGATCGGCTGCATTTCCGCTCTATTCTTTACTAAGTGAAGTTTCCATGAGCATTGATCCTCAGTCTGATAAAACAGTGTCTTTCCTTCAGCAGTTAGTCAXXXXXXXXXXGGGGAGCGATGTTCGGCTTATGAGAAGCTTAGTTCGGTTATTTCCTCTGTAACTACTCCACTGGGATGGATGTATCAAGAACGATCCTTATATTCTGAAG
>Marker669349
ATATTGTTTTTCCTAATTCCCTTTTGGGAACTTAGCATTCCACTTTTCTGGTGCAGGAGGTTTGTTTCATGCTTCCACCACTGTTGAGCTTACTTCTGGAXXXXXXXXXXATCTTCTGATATATACAATCCGATCTCTTCTGCTAGGGATGCTTCATACACTACCCAGCCGCTTGAGCTACTTAATGCTGTCGGTTTAGACAACTCAAAA
ATATTGTTTTTCCTAATTGCCTTTTGGGAACTTAGCATTCCACTTTTCTGGTGCAGGAGGTTTGTTTCATGCTTCCACCACTGTTGAGCTTACTTCTGGAXXXXXXXXXXATCTTCTGATATATACAATCCGATCTCTTCTGCTAGGGATGCTTCATACACTACCCAGCCGCTTGAGCTACTTAATGCTGTCGGTTTAGACAACTCAAAA
>Marker669421
TATGAGTTAGGTAAATTGAATAAGAATAGTGAGATGGATTGCCACTAATCAACTAGATAGCCATGGCATAAGAAACTTTTGCACTGCCATTTCATATCTTXXXXXXXXXXGTATTCAAGAGAGCATGGCACACTACTATAATAGAATGGATGGTTATACTGTTATAATTTTTAACGTGTCTATTGTTAAGTCAAGGATCCTTGCCATTAT
TATGAGTTAGGTAAATTGAATAAGAATAGTGAGATGGATTGCCACTAATCAACTAGATAGCCATGGCATAAGAAACTTTTGCACTGCCATTTCATATCTTXXXXXXXXXXGTATTCAAGAGAGCATGGCACACTACTATAATAGAATGGATGGTTATACTGTTATAATTTTTAACGTGTCTATTGTTAAGTCAAGGATCCTTGCCATTAG
>Marker672834
TAGTTAGTTAATAATTTGATTGAACCAAGGACGCATTAGTTATCGTAGGTTGTTCAGACCAAGCCGAGCCGAACTTTACTCAAATTTGGCTCGTTATCTTXXXXXXXXXXGGTTTTTATTTTTCTCAAATAAAATAGTTAAATCTAAATAATATAGCCACTTGCATTTTGAGTAGAACAATTACAAATTACATATGACTAATTGTATATA
TAGTTAGTTAATAATTTGATTGAACCAAGGACGCATTAGTTATCGTAGGTTGTTCAGACCAAGCCGAGCTGAACTTTACTCAAATTTGGCTCGTTATCTTXXXXXXXXXXGGTTTTTATTTTTCTCAAATAAAATAGTTAAATCTAAATAATATAGCCACTTGCATTTTGAGTAGAACAATTACAAATTACATATGACTAATTGTATATA
>Marker674109
AAATACTCATACACAAGCAACTTCTCCCCTCTCTCCAAGCAATAACCTAACAACCTAACCAAATTCTTATGTTGAAGCTTCACAATCACCATCACTTCATXXXXXXXXXXGGTAGCTTCCCCTGAAAAAAACGTTAATTCAAATATTGGATCCAACAATGATCACCAAACGTTACCAGAGACAAGATCGTGAACCCAACCATGTAGACAG
AAATACTCATATACAAGCAACTTCTCCCCTCTCTCCAAGCAATAACCTAACAACCTAACCAAATTCTTATGTTGAAGCTTCACAATCACCATCACTTCATXXXXXXXXXXGGTAGCTTCCCCTGAAAAAAACGTTAATTCAAATATTGGATCCAACAATGATCACCAAACGTTACCAGAGACAAGATCGTGAACCCAACCATGTAGACAG
>Marker674323
TAATATGTCATCAACCTTTAAAACATAACCTACATATCAACAATCCATTGCATTTGTAACAGCAAGTCATTTTTGTTAATTTTTCATTCAAAAATTTTATXXXXXXXXXXAAAAAATTTTCATTTTGAAATATAATGCCCGTGTATTTCTTTAGTTGTTTCATTCATTGATTTGATTTGAATGTCCATGGAAAGTGATGATTTGAAGAGG
TAATATGTCATCAACCTTTAAAACATAACCTACATATCAACAATCCATTGCATTTGTAACAGCAAGTCATTTTTGTTAATTTTTCATTCAAAAACTTTATXXXXXXXXXXAAAAAATTTTCATTTTGAAATATAATGCCCGTGTATTTCTTTAGTTGTTTCATTCATTGATTTGATTTGAATGTCCATGGAAAGTGATGATTTGAAGAGG
>Marker674324
TACGCCGAGACCGTATCGAATTTGAATGATGTTCTTGCTAAGCTTGGTTAAGAGTGGTTCTTGATTTTGATGTTTCAAAGGTTGTCTCTTGTTTGGTTTGXXXXXXXXXXATTTTATGTCCGGTCGGTTAATTAACTTAACTGACCACATCTGGTGGTAGGTTAATTGACCAATCATTAACCGAATGCCATGGTTTTTTTGTCGGAGTAG
TACGCCGAGACCGTATCGAACTTGAATGATGTTCTTGCTAAGCTTGGTTAAGAGTGGTTCTTGATTTTGATGTTTCAAAGGTTGTCTCTTGTTTGGTTTGXXXXXXXXXXATTTTATGTCCGGTCGGTTAATTGACTTAACTGACCACATATGGTGGTAGGTTAATTGACCAATCGTTAACCGAATGCCATGATTTTTTTGTTGAAGTAG
>Marker674417
ACAAACGAAGCAGGCTTAGTCATCTCGACTCTTTCGCCCGAGAATTTGGGTTCCAGCAAGGTTGCCAGGGACCACATATAAAACTTCAACGGTTGGTTCCXXXXXXXXXXAACCTCGAAACTTGGATGACTTCTTCCCTGTGAATTGATTGGTTAACATTGAAGTCCAACCTTGCTAGATCAGCAAGAGCATCATTGTAGTAGTAACCAT
ACAAACGAAGCAGGCTTAGTCATCTCGACTCTTTCTCCCGAGAATTTGGGTTCCAGCAAGGTTGCCAGGGACCACATATAAAACTTCAACGGTTGGTTCCXXXXXXXXXXAACCTCGAAACTTGGATGACTTCTTCCCTGTGAATTGATTGGTTAACATTGAAGTCCAACCTTGCTAGATCAGCAAGAGCATCATTGTAGTAGTAACCAT
>Marker674527
ACGTTGTTATCCGAAGATCTGCTTGGTGTTTATGCGGATACTGATAGGTGGACATTAAGGGGAAACAAAACTAGTGTTTTCAGACTATTACGACCTTGCAXXXXXXXXXXTTCTCTCATAAAAAATTATTCATATTTTCCGGAAAAAAATACAGAGAAATCGATATTTATTTATTATTAAAACCCACCCCCACCCCTCCAGATCCAAAAA
ACGTTGTTATCCGAAGATCTGCTTGGTGTTTATGCGGATACTGATAGGTGGACATTAAGGGGAAACAAAACTAGTGGTTTCAGACTATTACGACCTTGCAXXXXXXXXXXTTCTCTCATAAAAAATTATTCATATTTTACGGAAAAAAATACAGAGAAATCGATATTTATTTATTATTAAAACCCACCCCCACCCCTCCAGATCCAAAAA
>Marker674773
CGTTTAGATAACAGTCTTCCTTTTTCAACCCCGTCAAAGTAGACGCGCCTCGCCTCTCAAAATTCAAATTATTCCTCCCCCCAAAATCACTCTCTCTATCXXXXXXXXXXAGAGTCGGAAGAGAAGAAGTGGTCTTTTGACGAGGAAGAGTTCCGTCGTTATTTCCAGTAGACGAAGCGGTTGAGATGATGGCTTCTAGGAATCAGAACA
CGTTTAGATAACAGTCTTCCTTTTTCAACCCCGTCAAAGTAGACGCGCCTCGCCTCTCAAAATTCAAATTATTCCTCCCCCCAAAATCACTCTCTCTCTAXXXXXXXXXXAGAGTCGGAAGAGAAGAAGTGGTCTTTTGACGAGGAAGAGTTCCGTCGTTATTTCCAGTAGACGAAGCGGTTGAGATGATGGCTTCTAGGAATCAGAACA
>Marker674784
TCCGAGGAGTCCGACGACGGTAAGGATCCGGTTCCTGATTTTTGAATTTCATTTGCGCGATGGATTTAGTTGATTTTTTAATTGGTGTTTTTTTTGTAGAXXXXXXXXXXAAGAAGCTAGATGGAGCTAGCTCGGCGGCTGCAAATGAAGTGTTGGAGAGTAGTGTGATTGAGTTTACGAAGGAGGAAGTTGAGGTGTTGGTGAATGAGA
TCCGAGGAGTCCGACGACGGTAAGGATCCGGTTCCTGATTTTTGAATTTCATTTGCGCGATGGATTTAGTTGATTTTTTAATTGGTGTTTTTTTTTGTAGXXXXXXXXXXAAGAAGCTGGATGGAGCTAGCTCGGCGGCTGCAAATGAAGTGTTGGAGAGTAGTGTGATTGAGTTTACGAAGGAGGAAGTTGAGGTGTTGGTGAATGAGA
>Marker675973
ATGTTGGGTGCTATTGGGTTTTCTCACCCCAAAAGTTAGTTCAAAGAATGTGACTTTCCCTCATATTTATAAACATCACCCAACCCCTTCCACTTTTCGAXXXXXXXXXXCCCAAATCGGGAAAAACCACGGGACCGTAGTCCAAGCAACAACTCCACTATACTTTGGTGGGATCACAAGTCCTCCCTAGAATAGGTAGAGGATTATAAA
ATGTTGGGTGCTATTGGGTTTTCTCACCCCAAAAGTTAGTTCAAAGAATGTGACTTTCCCTCACATTTATAAACATCACCCAACCCCTTCCACTCTTCGAXXXXXXXXXXCCCAAATCGGGAAAAACCATGGGACCGTAATCCAAGCAACAACTCCACTATACTTTGGTGGGATCACAAGTCCTCTCTAAAATAGCTAGAGGATTATAAA
>Marker675999
ACCCATTGCCATAATCGCCAACTCCATCTGTTCCTTCCCTTTCTCGCTCATTAACATAACTCAATGATCAGTTGGATCACTCCATACATACTAGCTCTCTXXXXXXXXXXCAGAGTCTGACTGAACATGATGCTGCGTGATGAACAGGGCACTTCCCCCAATGTCCAAGACTACGACCAGTGCACAGCTATGCATCTCGACGCGAGTGAA
ACCCATTGCCATAATCGCCAACTCCATCTGTTCCTTCCCTTTCTCGCTCATTAACATAACTCAATGATCAGTTGATCACTCCATACATACTAGCTCTCTGXXXXXXXXXXCAGAGTCGGACTGAACATGATGCTGCGTGATGAATAGGGCACTTCCCCCAATGTCCAAGACTACGACCAGCGCACAGCTATGCATCTCGCCGCGAGTGAA
>Marker681884
CTCGATGTCTACCGGCTACACGCCGCACCGGCAAGCACCAAATACAAACTTCGCAAATGGCTATGAACTCCAAGACATATGAGTGAAGGGTTCCTCGATAXXXXXXXXXXATAAAAAGGTGTAAAGTGACGTAAAGGATTATAAATGCATGCATGGAAGAAGAATAGAACAACTACATATCATACATGTGGTGGATGTGCTGGACCATAT
CTCGATGTCTACCGGCTACACGCCGCACCGGCAAGCACCAAATACAAACTTCGCAAATGGCTATGAACTCCAAGACATATGAGTGAAGGGTTCCTCGATAXXXXXXXXXXATAAAAAGGTGTAAAGTGACGTAAAGGATTATAAATGCATGCATGGAAGAAGAATGGAACAACTACATATCATACATGTGGTGGATGTGCTGGACCATAT
>Marker681945
CACTGAAATTTGTCACGCCATGCATGCAAATCGTGGAGAAGTCGTTTAATGTTTATTTTAATTATTGGGTAGGTGGGGGTTGATGTGTCATTTATTTATAXXXXXXXXXXTAAAAGTATGTTTCGCCATTTTATAGGCAATTCCGTTGGCACCACGTTCGACCACCTACACCTATAACCAAAGGCACGTCGCTAGAAAGGCTAAAACTTC
CACTGAAATTTGTCACGCCATGCATGCAAATCGTGGAGAAGTCGTTTAATGTTTATTTTAATTATTGGGTAGGTGGGGGTTGATGTGTCATTTATTTATAXXXXXXXXXXTAAAAGTATGTTTCGACATTTTATAGGCAATTCCGTTGGCACCACGTTCGACCACCTACACCTATAACCAAAGGCACGTCGCTAGAAAGGCTAAAACTTC
>Marker687303
ACCGGCGGAACAACTGCCGTCCACTTCATCCGACCAATCTACTCTGCCCTCTGGTTGATCCTAAAAACTCACCTCTGAGAAAATGGGCGGCGCTACTAGAXXXXXXXXXXTCCCGTCTCATAAAAACACCCCGCCAAATTCATGTTCGAGCCACCTCCGCCGTCCAATTTACCAACTCTTCTGATCAGCCTTCTTCGGTTTTCCATCAGT
ACCGGCGGAACAACTGCCGTCCACTTCATCCGACCAATCTTCTCTGCCCTCTGGTTGATCCTAAAAACTCACCTCTGAGAAAATGGGCGGCGCTACTAGAXXXXXXXXXXTCCCGTCTCATAAAAACATCCCGCCAAATTCATGTTCGAGCCACCTCCGCCGTCCAATTTACCAACTCTTCTGATCAGCCTTCTTCGGTTTTCCATCAGT
>Marker687366
TTTCCTGTTCAAAAATGCTGAGGAGTTGGTTAAGAGGATGCAGTTGCTTTTGAATGAGCAAAATAACAATGTAAGTATTAGCAATTGTGTAAAGCTTTCAXXXXXXXXXXCTGGATGCAATTCTGTTGTCTTAAGATGATTTAGTTGCTAGATACCCTGGTGAAATTGAATCAATGTCTGGTCCATATTTTTAGGTGCCAAGCAGTGAAA
TTTCCTGTTCAAAAATGCTGAGGAGTTGGTTAAGAGGATGCAGTTGCTTTTGAATGAGCAAAATAACAATGTAAGTATTAGCAATTGTGTAAAGCTTTCAXXXXXXXXXXCTGGATGCAATTCTGCTGTCTTAAGATGATTTAGTTGCTAGATACCCTGGTGAAATTGAATCAATGTCTGGTCCATATTTTTAGGTGCCAAGCAGTGAAA
>Marker697289
TAGGTCTATATTCATGTGTTACGGCAAATGAAAGGACTCAAGAAGAGGGACTTTCTTTATTTCCGTCTGATGCAGAAGATGTTGGTCAAAAGTCTCAGTGXXXXXXXXXXAATGCATTGAGCAATACAATGTTCCTCCTGATCTTCGATTCTCATTGTTGAGCCGAATCAGATTTGCTCGAGCCTTTCGGTCTCCTGGAATATGTAGGTT
TAGGTCTATATTCATGTGTTACGGCAAATGAAAGGACTCAAGAAGAGGGACTTTCTTTATTTCCATCTGATGCAGAAGATGTTGGTCAAAAGTCTCAGTGXXXXXXXXXXAATGCATTGAGCAATACAATGTTCCTCCTGATCTTCGATTCTCATTGTTGAGCCGAATCAGATTTGCTCGAGCCTTTCGGTCTCCTGGAATATGTAGGTT
>Marker700731
ATTTTGTTCATTGTGGTGCCTGCTGAAGCCTCATTACGTTTGGAAATATTTGTTTAACAGTTTTTGTGCGTTTGTTTGGGTTAGATTGGAGCAGGAGTCAXXXXXXXXXXAAGTATGTTCTGTCAGCCGTGTTTGAGATTTAGTGTTATTGCATTTTGGCGTCCTCATTTTTCTTCCTCGTCTTGCTTTTGAATTGTTGATTGTCAAGTC
ATTTTGTTCATTGTGGTGCCTGCTGAAGCCTCATTACGTTTGGAAATATTTGTTTAACAGTTTTTGTGCGTCTGTTTGGGTTAGATTGGAGCAGGAGTCAXXXXXXXXXXAAGTATGTTCTGTCAGCCGTGTTTGAGATTTAGTGTTATTGCATTTTGGCGTCCTCATTTTTCTTCCTCGTCTTGCTTTTGAATTGTTGATTGTCAAGTC
>Marker700802
GAAATAAATGAACCATCACAGTGTCGATCTCTGAGGCTTCTTGACAATTTGACTGCAATGAGGGTAGGTTGCTTTCTCCATTTCTGCAAATTATCTTTGTXXXXXXXXXXTATTATGTATTCAGCTAGCGGTTATATCGTAGGTTAATCCGGTCAGCGTAACTGTATGTGATGCTGTTGTAATTACCATGCGTGGGCAATTGTTTCAGGT
GAAATAAATGAACCATCACAGTGTCGATCTCTGAGGCTTCTTGACAATTTGACTGCAATGAGGGTAGGTTGCTTTCTCCATTTCTGCAAATTATCTTTGTXXXXXXXXXXTATTATGTATTCAGCTAGCGGTTATATCGTAGGTTAATCCGGTCAGCGGAACTGTATGTGATGCTGTTGTAATTACCATGCGTGGGCAATTGTTTCAGGT
>Marker702295
TTAATAGATTAAATTAGATAAATAAGTTGTAGACTAATAGTAAGACTTTCGGTTCTATTAAAACCATACTCAAAAAGCAGAATTTGAAGTTTGATGCTGAXXXXXXXXXXATTCCTTCAAGAGAAAGGAGTGGTCGCTGCTTGTTTAATCATGGATGTCGACGGTGGGACTTGACCCCAATTGAAGTAGTAGTTACGTGAGATGGGTTTG
TTAATAGATTAAATTAGATAAATAAGTTGTAGGCTAATAGTAAGACTTTCGGTTCTATTAAAACCATACTCAAAAAGCAGAATTTGAAGTTTGATGTTGAXXXXXXXXXXATTCCTTCAAGAGAAAGGAGTGGTCGCTGCTTGTTTAATCATGGATGTCGACTGTGAGACTTGACCCCAATTGAAGTAGTAGTTACGTGAGATGGGTTTG
>Marker702416
AGAAGTGGTCCAGTGTATGGCAGGGCTGCAAAATCAACCATGACTTCCAAAGCCAGGCGAGGAAGGACTCAGAGGAGTCCCTTCCATTGCGTTTGTCATGXXXXXXXXXXCACAGAGCTCACATGCAGCTTTAATTGGATCAAAATCATAAAGATTGAAGCTATCGGCAGAATCCAAAGGATTACTTTCAACAGGGACACCAAATGCAGA
AGAAGTGGTCCAGTGTATGGCAGGGCTGCAAAATCAACCATGACTGCCAAAGCCAGGTGAGGAAGGACTCAGAGGAGTCCCTTCCATTGTGTTTGTCATGXXXXXXXXXXCACAGAGCTCACATGTAGCTTTAATTGGATCAAAATCATAAAGATTGAAGCTATCGATAGAATCCAAAGGATTACTTTCAATAGGGACACCAAATGCAGA
>Marker704699
TTAGAATATTGGGGTAATTGATATTGTAATAAACGAGACAGGGCAAAAATGACATTCATTCAGCCCGCATAGGTATCAACGACACCTGGAACTGACATTTXXXXXXXXXXAAAACTCTGTTATATTTGGATGAAACAAAAATATAAGAGAGTTAAATGTTAACGGAATAATAATGCGGCTTTAAGAAAACGTAATATGAATAATGGCAAT
TTAGAATATTGGGGTAATTGATATTGTAATAAACGAGACAGGGGAAAAATGACATTCATTCAGCCCGCATAGGTATCAACGACACCTGGAACTGACATTTXXXXXXXXXXAAAACTCTGTTATATTTGGATGAAACAAAAATATAAGAGAGTTAAATGTTAACGGAATAATAATGCGGCTTTAAGAAAACGTAATATGAATAATGGCAAT
>Marker707649
TTTCCGTGCCTTCCAATCCCGAGCAAGGTCTTTGGCAGGAATGTCCTCTTTCTCTCATTCTGTTTACTTTGTGTGTTGAACATCTTAGTAATCTGAGTATXXXXXXXXXXCGGGATTGCCTTGAGAAATTTTGTGTGGCTTTGGGTCAAGTGGTTAGTAATGATAAATCTCGAATTTTCTTCTCCGAAAATCTTTCTGTTAGTCAAAGAC
TTTCCGTGCCTTCCAATCCCGAGCAAGGTCTTTGGCAGGAATGTCCTCTTTCTCTCATTCTGTTTACTTTGTGTGTTGGACATCTTAGTAATCTGAGTATXXXXXXXXXXCGGGATTGCCTTGAGAAATTTTCTGTGGCTTTGGGTCAAGTGGTTAGTAATGATAAATCTCGAATTTTCTTCTCCGAAAATCTTTCTGTTAGTCAAAGAC
>Marker707658
ACGACGCTGCTGTTTGTCCCAAAATTCCAGCCCTCTAGACAACTCCGGCCCTTAGTCAACACCAGATTTTGTCGGAAGCCTTCGGCTGCCGACCTGCTGCXXXXXXXXXXGGGACAACCTGCGACTGAGAAAGGAAAATCGATCAAATCTGTGTTAATTCAAAGGCAAAATCAGGGGAGTCTTCTGCTCTTGAAGCGTCCACATCCAAAG
ACGACGCTGCTGTTTGTCCCAAAATTCTAGCCCTCGAGACAACTCCGGCCCTTAGTCAACACCAGATTTTCTCGGAAGCCTTCGGCTGCCGACCTGCTGCXXXXXXXXXXGGGACAACCTGCGACTGAGAAAGGAAAATCGATCAAATCTGTGTTAATTCAAAGGCAAAATCAGGGGAGTCTTCTGCTCTTGAAGCGTCCACATCCAAAG
>Marker707736
CTTAGTCAACACCAGATTTTGTCGGAAGCCTTCGGCTGCCGACCTGCTGCTCTTTCCGACGGTGAGAATCGACTGGATTTCGAACCTTGGTGGACTTACCXXXXXXXXXXGGGACAACCTGCGACTGAGAAAGGAAAATCGATCAAATCTGTGTTAATTCAAAGGCAAAATCAGGGGAGTCTTCTGCTCTTGAAGCGTCCACATCCAAAG
CTTAGTCAACACCAGATTTTCTCGGAAGCCTTCGGCTGCCGACCTGCTGCTCTTTCCGACGGTGAGAATCGACTGAAGTTCGAACCTTGGTGGACTTACCXXXXXXXXXXGGGACAACCTGCGACTGAGAAAGGAAAATCGATCAAATCTGTGTTAATTCAAAGGCAAAATCAGGGGAGTCTTCTGCTCTTGAAGCGTCCACATCCAAAG
>Marker707751
ACCTCCCTTTACCTTGGAAAGAAGTGGATTTGCAACTTCCTTCAAGCCCAAGTCCAATGTGAGCCTAACCTTCTTTCAATTTGGACTGGGTCTTTTAACGXXXXXXXXXXAAGTTGCAGCGGTGACTCCTAACTCCCCAATGCCACCGAGTAATCAAACCAGGCTTGATCAGAGTTTAGTGCCTGCACCCGAGTTAACTCCGGGTCTTTC
ACCTCCCTTTACCTTGGAAACAAGTGGATTTGCAACTTCCTTCAAGCCCAAGTCCAATGTGAGCCTAACCTTCTTTCAATTTGGACTAGGTCTTTTAACGXXXXXXXXXXAAGTTGCAGCGGTGACTCCTAACTCCCCAACGCCACCGAGTAATCAAACCAGGCTTGATCAGAGTTTAGTGCCTGCACCCGAGATAAGTCCGGGTCTTTC
>Marker714264
TCTTTGGTCGAATACTCTGATTTTCCCTGACAAATACAATGCTAGAAAGCCAAGTCCTGCAAACGACCCTGCATACGTGATGTGGAAGTTGAGCTTTTTGXXXXXXXXXXGAGACTAAGTGCGGCTGAATGAGTGCTAGTCTGATATCATTTTGTAAGATTGTATTGGAACTTTATTTTCATGAGCTAGCGTAAAAGGAATGAAGATCCT
TCTTTGGTCGAATACTCTGATTTTCCCTGACAAATACAATGCTAGAAAGCCAAGTCCTGCAAACGACCCTGCATACGTGATGTGGAAGTTGAGCTTTTTGXXXXXXXXXXGAGACTAAGTGCGGCTGAATGAGTGCTAGTCTGATATCATTTTGCAAGATTGTATTGGAACTTTATTTTCATGAGCTAGCGTAAAAGGAATGAAGATCCT
>Marker714424
ATCTAAACGCAGTCGAGATTCACCGTTCGACATCTCCAAAGAATTTCCTTATCACTTCTGGGACGAAATTGCTCCGAAACCAGAGTCGGATGGAAAATTTXXXXXXXXXXGGGAAACTGGTGGAATCAAGCCATCTTCCAGTCCATAGTTTGACAAGGTCTAATCTCTATGCTACACGAAGCAAAATCGACAGGTTATATACAAAGTTAG
ATCTAAACACAGTCGAGATTCACCGTTCGACATCTCCAAAGAATTTCCTTATCACTTCTGGGACGAAATTGCTCCGAAACCAGAGTCGGATGGAAAATTTXXXXXXXXXXGGGAAACTGGTGGAATCAAGCCATCTTCCAGTCCATAGTTTGACAAGGTCTAATCTCTATGCTACACGAAGCAAAATCGACAGGTTATATACAAAGTTAG
>Marker717245
AAACCAAGTAATCACAAACATGCAAATCAGTTGAAATAGAGATTAATAAATGGAAATTAAAAGTTGTTCTTCCTCATCTGCACTCATGACAGAACTAACAXXXXXXXXXXCTCCAAAGTCGAGCCTTCTTAGCAACAATGGATAGCGTGGTCAATCCAAGTTAACTTCTTTGGACTATTTATAGCTGCCTCAAGTTCTAAACAGCAAGAA
AAACCAAGTAATCACAAGCATGCAAATCAGTTGAAATAGAGATTAATAAATGGAAATTAAAAGTTGTTCCTCCTCATCTGCACTCATGACAGAACTAACAXXXXXXXXXXCTCCAAAGTCGAGCCTTCTTAGCAACAATGGATAGCGTGGTCAATCCAAGTTAACTTCTTTGGACTATTTATAGCTGCCTCAAGTTCTAAACAGCAAGAA
>Marker717256
AGCATTTCTAAAGGATTTCCCAGCACCTTAAGCCCAAAATCAACCGAGTCAAAGACGCATGGACCCCAGCTTAAACTTCTTGGCTTTCTTAAAACTGTAGXXXXXXXXXXCGGACAACGAGATATCTGACTCCACCCCCAGCCCTTGAGTGGTCTCTATCGCCAATACCCTCGAATCACACGCCCCTTCCCAAATCTCCTCTCTCTCCAG
AGCATTTCTAAAGGATTTCCCAGCACCTTAAGCCCAAAATCAACCGAGTCAAAGACGCATGGACCCCAGCTTAAACTTCTTGGCTTTCTTAAAACTGTAGXXXXXXXXXXCGGACAACGAGATATCTGACTCCACCCCCAGCCCTTGAGTGGTCTCTATCGCCAATACCCTCGAATCACACGCCCCTTTCCAAATCTCCTCTCTCTCCAG
>Marker717882
CAAAGAGCCTCATCGAGCTTCATTGACCAATCCCTAAGAGATTGTTCGATCGTCTTTCCAAGAATTCACTTGAGCTCATGATTTGTCACTTCGTCCAGACXXXXXXXXXXCTTCGAAATGAATGCGAAGGCATGCCATGAACATTACCAGCACCTTAGCATCATTACCCTTCTCTTTATATAATAGTGTGTTGTCTAATGCATGGAACCT
CAAAGAGCCTCATCGAGCTTCATTGACCAATCCCTAAGAGATTGTTCGATCGTCTTTCCAAGAATTCGCTTGAGCTCATGATTTGTCACTTCGTCCAGACXXXXXXXXXXCTTCGAAATGAATGCGAAGGCATGCCATGAACATTACCAGCACCTTAGCATCATTACCCTTCTCTTTATATAATAGTGTGTTGTCTAATGCATGGAACCT
>Marker717901
TTTATTTTTAAAGCTGGAAGAGTAGCATCTATATTTAGTGGCTTAATCGCCCATATAGGTTTATGCTCAAGGTTGACTGATAAATGACAAGCCTTACTATXXXXXXXXXXAGGTTTATGCTCAAGGTTGACTGATAAATGACAAGCCTTACTATAAAATACTCGACAAGGTGAAGTGTCGATCCATAGGAGTCTGGAAGGCAGTTCGAAA
TTTATTTTTAAAGCTGGAAGAGTAGCATCTATATTTAGTGGCTTAATCGCCCATATAGGTTTATGCTCAAGGTTGACTGATAAATGACAAGCCTTACTATXXXXXXXXXXAGGTTTATGCTCAAGGTTGACTGATAAATGACAAGCCTTACTATAAAATACTCGACAAGGTGAAGTGTCGGTCCATAGGAGTCTGGAAGGCAGTTCGAAA
>Marker719388
ATTTCCTTTGGTATATATTCCATAGGGAAGCCGTTCCAACGCAACCAAACTAACTTCTTAGGGAAATTCTTGTAGTTTCCTTTGAATCTAACACCAGTGAXXXXXXXXXXCACCATCAATTTTCTACTTGAACTCATGTCCTTCTTTTGAGACTTTGACAAACTTCTATTCAGCATTGGAAGATTGATAATGATACCTTTAACTATATCA
ATTTCCTTTGGTATATATTCCATAGGGAAGCCGTTCCAACGCAACCAAACTAACTTCTTAGGGAAATTCTTGTAGTTTCCTTTGAATCTAACACCAGTGAXXXXXXXXXXCACCATCAATTTTCTACTTGAACTCATGTCCTTCTTTTGAGACTTTGACAAACTTCTATTCAGCATTGGAAGATTGAGAATGATACCTTTAACTATATCA
>Marker719731
TTCATGGGTTACGCATCAATGTCCGCTACCCTATTATCTCTCATTTGATGTTTGTGGATGACACAATCCTCTTTTTAAGGGTTACAAATGATGAGATTACXXXXXXXXXXTGTGCCGTTCCAGCCAACTGACCGACATCTGGTCCTACCATGCATCATCCTACGATCGGCTTAGTGTTAAGAATTTTACGTTATTTAACCAGGCGTTATT
TTCATGGGTTACGCATCAATGTCTGCTACCCTATTATCTCTCATTTGATGTTTGTGGATGACACAATCCTCTTTTTAAGGGTTACAAATGATGAGATTACXXXXXXXXXXTGTGCCGTTCCAGCCAACTGACCGACATCTGGTCCTACCATGCATCATCCTACGATCGGCTTAGTGTTAAGAATTTTACGTTATTTAACCAGGCGTTATT
>Marker722808
TAGATCTGGAGCTGTGATGGTGCCGTCAACGAATCCCATCTTGTTCTTGTCGTTAAGAACCATGCTGATCACCATAGAACACTATGAATAGTTGAACTCCXXXXXXXXXXTGCTAATTGTTGCATCACATGTGTAGCTCCCCCGCACTAGAGTTTCCCCCAAAATAGCCGTGCTTCTAGCTCCTCGCGACCCTCGAGGTAGTTTGCCGTC
TAGATCTGGAGCTGTGATGGTGCCGTCAACGAATCCCATCTTGTTCTTGTCGTTAAGAACCATGCTGATCACCATAGAACACTATGAATAGTTGAACTCCXXXXXXXXXXTGCTAATTGTTGCATCACATGTGTAGCTCCCCCGCACTAGAGTTTCCCCCAAAACAGCCGTGCTTCTAGCTCCTCGCGACCCTCGAGGTAGTTTGCCGTC
>Marker727854
CCTAGAAGATCTATGATTACTACTTCGTAATCTCAATGTGGACCCCATATTTTGATGTCCATGCCCCGATTACGAAAATCTTGACGTGGATTAGGCTACCXXXXXXXXXXTCGACTTGACCAAACCTATACTTAGGAAATACGAACTCGAAAGCAAGCTGTTTGAAATTGCTTTTGAAAGCTTGAAGGATTTCCGTGTCAATTACGGTTT
CCTAGAAGATCTATGATTACTACTTCATAATCTCAATGTGGACCCCATATTTTGATGTCCATGCCCCGATTACGAAAATCCTGACGTGGATTAGGCTACCXXXXXXXXXXTCGACTTGACCAAACCTATACTTAGGAAATACGAACTCGAAAGCAAGCTGTTTGAAATTGCTTTTGAAAGCTTGAAGGATTTCCGTGTCAATTACAGTTT
>Marker727880
TTCCACCTTCTGACTTTGCAACGATGGAGAATGAGCAAAATCATCACTCTTAGGAATAAAAGCGGTATCTGGATTGATGACATATCAAGCATCAAAGATCXXXXXXXXXXTTCAGAAGAGCTGGGAGTCGGTAGGTAAAGACCTTGTTGAGTTTGTTATTAGCTACTTTCAAGACCTGAACAGGGTGAAGATGGTTAATGATACTCTTAT
TTCCACCTTCTGACTTTGCAACGATGGAGAATGAGCAAAATCATCACTCTTAGGAATAAAAGCGATATCTGATTGATGACATATCAAGCATCAAAGATCTXXXXXXXXXXTTCAGAAGAGCTGGGAGTCGGTAGGTAAAGACCTTGTTGAGTTTGTTATTAGCTACTTTCAAGACCTGAACAGGGTGAAGATGGTTAATGATACTCTTCT
>Marker730045
AAGTTTTGCGATGGAATTTCTGATATGGAGGAGGTTGGGTTGCAGAAACTGGCAGATTTGCTGAGCATCGAGAGGGAGGATGGTGAAGCTTTACATGAAGXXXXXXXXXXCACTGCCCATTCCATGCTATCGTCCCCGTTATCATCCTTATCCTCGTCCTCCTCGTCGATGTCTTCTTCTTCCCCTGCATACCCCTTCCAGAATGGGTCA
AAGTTTTGCGATGGAATTTCTGATATGGAGGAGGTTGGGTTGCAGAAACTGGCAGATTTACATGAAGCTGGTTCTGACAGTTTACTCACTGCAATGGTGTXXXXXXXXXXCACTGCCCATTCCATGCTATCGTCGTCGTTATCATCCTTATCCTCGTCCTCCTCGTCGATGTCTTCTTCTTCCCCTGCATACCCCTTCCAGAATGGGTCA
>Marker732920
AAAAATGACCATGATAAACGAAACAAACCCTAACGACACAGGACCTGATAAAAAAAACCCCACGAAAATACAAAGCCCATAGATTAACTCAACCTGCGAAXXXXXXXXXXGGGAAAAGGTTGGTGATAAAGATTCGAAAACTCCCCACATGACATGCCATGAGAGTAGCAGGATACGAAACTGCAAGCTAGAGCCAAGAAAAAGGACAAA
AAAAATGACCATGATAAACGAAACAAATCCTAACGACACAAGACCTGATAAAAAAAACCCACGAAAATACAAAGCCCGTAGATTAACTCAACATGCGAAAXXXXXXXXXXGGGAAAAGGTTGGTGATAAAGATTCGAAAACTCCCCACATGACATGCCATGAGAGTAGCAGGATACGAAACTGCAAGCTAGAGCCAAGAAAAAGGACAAA
>Marker732962
TATTGGCATTATTTTAATTTTGACTTATTACTCAAATAATCAAAATCTATCAATAAAATAAATAACTTACTAATAACACGAGATCTTAATCGAGATTTTAXXXXXXXXXXCATCTCAAGCCGTGAGATCAATCTCTTCACAGGCTAGGAGATATGAACGATCCTTTCTTGCCAATTTATCAACAGCTCAAATACCTGCAGATGCAAGCGA
TATTGGCATTATTTTAATTTTGACTTATTACTCAAATAATCAAAATCTATCAATAAAATAAATAACTTACTAATAACACGAGATCTTAATCGAGATTTTAXXXXXXXXXXCATCTCAAACCGTGAGATCAGTCTCTTCACTAGCCGGGAGATATGAACGATCCTTTCTTGCCAATTTATCAACAACCCAAATACCTGCAGATGCAAGCAA
>Marker732965
ATCTTCTCAAGGCAGACCAATCCATGTCTCAGAAATTCGTGTGGCTTCACATCTGAGAGGTCAAAAACCTGCATTACGCATCACTCAGACATTTCAACAAXXXXXXXXXXGAGTAACACATTCATCAATAACACTAACCTCCTCCGGATCTGAAGTTTCAAATTTTCTATTTTTATTTTGTGGTAGAGGTTAGGTAGTATATCCTGGATG
ATCTTCTCAAGGCAGACCAATCCATGTCTCAGAAATTCGTGTGGCTTCACATCTGAGAGGTCAAAAACCTGCATTACGCATCACTCAGACATTTCAACAAXXXXXXXXXXGAGTAACACATTCATCAATAACACTAACCTCCTCCGGATCTGAAGTTTCAAAATTTCTATTTTTATTTTGTGGTAGAGGTTAGGTAGTATATCCTGGATG
>Marker732966
CTGTGGACAACAAATACTACAAAAAATACATCAAATGGACTAAAACGGTCCAAATGAACGGGTCTAGGCACAAAATGCCAAAACACGATATCACACGAAAXXXXXXXXXXTAATTTTCATGTTTGCTAAGAGTATATTTTTCCATTGATATGTAATTTTCATTTTTGTTGTCCATTGCAGGTAGAGGGACCCAAAACTGCAGAGGAATAA
CTGTGGACAACAAATAATACAAAAAATACATCAAATGGACTAAAACGGTCCAAATGAACGGGTCTAGGCACAAAATGCCAAAACACGATATCACACGAAAXXXXXXXXXXTAATTTTCATGTTTGCTAAGAGTATATTTTTCCATTGATATGTAATTTTCATTTTTGTTGTCCATTGCAGGTAGAGGGACCCAAAACTGCAGAGGAATAA
>Marker736331
TTGCCCGGAGTGACGATGGAAGAACTCGAGTGAGGACTAGTAATAAGTTCCTTATAGCTCAAATTCACATATGCCAACTAGGGGGTTTTAGGGTTAGGAAXXXXXXXXXXGTATGTCGATGACTGGACTGCAAACCCATAAAAAGGAGATGACCCCTAAAGTTCAGGTGATATGAGTGCAGCTAGGTATAACACATAATCGGCAGAAGCA
TTGCCCGGAGTGACGATGGAAGAACTCGAGTGAGGACTAGTAATAAGTTCCTTATAGCTCAAATTCACATATGCCAACTAGGGGGTTTTAGGGTTAGGAAXXXXXXXXXXGTATGTCGATGACTGGACTGCAAACTCATAAAAAGGAGATGACCCCTAAAGTTCAGGTGATATGAGTGCAGCTAGGTATAACACATAATCGGCAGAAGCA
>Marker737214
AACACAATCATGGTGTCTGGCAGATCGAGGTTGTGTGCCTCGATTCGCCGGGCTTCCGTTTCCTACTAACGACAACCCATGCGATGCATGGTTTGAGCTGXXXXXXXXXXTATTACCCAGCTGTGAACGGGTCGTCCACAAATTATCAACAGTCATCCTACGGACCCCAGGAGAGTCGTGGGGTTCACAGTTTTATCTCCCAAGGTTTGG
AACACAATCATGGTGTCTGGCAGATCGAGGCTGTGTGCCTCGATTCGCCGGGCTTCCGTTTCCTACTAACGACAACCCATGCGATGCATGGTTTGAGCTGXXXXXXXXXXTATTACCCAGCTGTGAACGGGTCGTCCACAAATTATCAACAGTCATCCTACGGACCCCAGGAGAGTCGTGGGGTTCACAGTTTTATCTCCCAAGGTTTGG
>Marker737325
ATTTCATTTGGGTAGATGCCAATCTAACTTCAATCTCATGATCTCAACTGCCGAAATCGGCACAATGTAGTTTGCGTTTCGATTGAATCAGAACATTATTXXXXXXXXXXATAGATATGCTCTCTCCTGAATCAAAATCACAGGACGTTTGGTTTTAGTAGTGTTCGAGTGAAGTTTGTTAGACATAAGAATGGTGATTCAAAAGAGGAT
ATTTCATTTGGGTAGATGCCAATCTAACTTCAGTCTCATGATCTCAACTGCCGAAATCGGCACAATGTAGTTTGCGTTTCGATTGAATCCGAACATTATTXXXXXXXXXXATAGATATGCTCTCTCCTGAATCAAAATCACAGGACGTTTGGTTTTAGTAGTGTTCGAGTGAAGTTTGTTAGACATAAGAATGGTGATTCAAAAGAGGAT
>Marker737363
CCGCCAACTATCTTCAACCACCTGCTTCAGACCAGTGATTAATGTTTGGTTTTCTGATCAAAATCTATGATTCCATCCTCGTTGTTGCCGCGACATGGTGXXXXXXXXXXCTGCGACCATGTGAATTGGTATCCTTGGAGCAATACATCGACGAGCCCGCAATCCTCCATCACTACCTGGAATCCCCTAATAAAGTGCGGCGGTCGCTCC
CCGCCAACTATCTTCAACCACCTGCTTCAGACCAGTGATTAATGTTTGGTTTTCTGATCAAAATCTATGATTCCATCCTCGTTGTTGCCGCGACATGGTGXXXXXXXXXXCTGCGACCATGTGAATTGGTATCCTTGGAGCAATACATCGACGAGCCCGCAATCCTTCATCACTACCTGGAATCCCCTAATAAAGTGCGGCGGTCGCTCC
>Marker737379
GCCACTGCCACTGTGCACTGATTATGATCAGTAACCGTCCCTTTCAAGCAGTTATGGTAACTTTTTGTGTGCCCATTGATCAGTTCATGATAAGAATCATXXXXXXXXXXAAATATATAAAAAATTTAAATTAAAGTGGAAGATATTTTTCTGACCCAACTTGACGAAAAAGGGGAAGTAGAGATTGTGCATAAATAAATAGTGCGAGAA
GCCACTGCCACTGTGCACTGATTATGATCAGTAACCGTCCCTTTCAAGCAGTTATGGTAACTTTTTGTGTGCCCATTAATCAGTTCATGATAAGAATCATXXXXXXXXXXAAATATATAAAAAATTTAAATTAAAGTGGAAGATATTTTTCTGACCCAACTTGACGAAAAAGGGCAAGTAGAGATTGTGCATAAATAAATAGTGCGAGAA
>Marker737386
GAGTCATAGGGACAACTTGATATTGATGGAAAGATACCATTTCTTTGCTTCAAGCTGCCGTCAATTTGGATTCGAATGCAAATCTCTCTCACAACATAAAXXXXXXXXXXAACTCAGTTTAGGGCAAGTGATAAAAAACTCAAACTATCTTATCTTGCAGGAACTCGAAGACCAAGCTGGTTGCAGAGATGTGAGGCAGGTGAGTCTACA
GAGTCATAGGGACAACTTGATATTGATGGAAAGATGCCATTTCTTTGCTTCAAGCTGCCGTCAATTTGGATTCGAATGCAAATCTCTCTCACAACATAAAXXXXXXXXXXAACTCAGTTTAGGGCAAGTGATAAAAAACTCAAACTATCTTATCTTGCAGGAACTCGAAGACCAAGCTGGTTGCAGAGATGTGAGGCAGGTGAGTCTACA
>Marker737389
TTGCTTGATCGATTCGGTAATATTGAGAACAACTAGTAAGTTTTGGTAATATTTTTGCTATATTTTGAAAATTCTTTCTTTATATAGGCGATTAACATGTXXXXXXXXXXTATCTTGGCTCTAGTTTTAAAGCTTTGCCATTATTAACAGCTTTTTAAATATGTAAGTAATGTCTCTAGATAGTAAATTAGTATCTTAGTCAATTTTTAG
TTGCTTGATCGATTCGGTAATATTGAGAACAACTAGTAAGATTTGGTAATATTTTTGCTATATTTTGAAAATTCTTTCTTTATATAGGCGATTAACATGTXXXXXXXXXXTATCTTGGCTCTAGTTTTAAAGCTTTGCCATTATTAACAGCTTTTTAAATATGTAAGTAATGTCTCTAGATAGTAAATTAGTATCTTAGTCAATTTTTAG
>Marker740924
TTTAGGCATCGTATGGTCTACAGGCTTTCTACCAGTCAAAAGCTCTAGTAAGACCACACCAAAACTATAGACATCGCTCTTCTGAGTTATTTGTCCCGTCXXXXXXXXXXTCTTGGAGCTGAAATCGTCAAAGAGAAGAACATTGCTCGACCTAACATCCCTATGGACTATAGAGGGTTGACATTTCTCGTGTAGGAACTCTAACCCTTT
TTTAGGCATCGTATGGTCTACAGGCTTTCTACCAGTCAAAAGCTCTAGTAAGACCACACCAAAACTATAGACATCGCTCTTCTGAGTTATTTGTCCCATCXXXXXXXXXXTCTTGGAGCTGAAATCGTCAAAGAGAAGAACATTGCTCGACCTAACATCCCTATGGACTATAGAGGGTTGACATTTCTCGTGTAGGAACTCTAACCCTTT
>Marker743093
GTAATTTCTTTTCTTTATCTTTTTGCTGCATCTTATGTGTCATTGTGTCATTCTTAATTGTGGAATGTTTTTTCTCCTCATTGTCGTGGTTTATTCCTCTXXXXXXXXXXACATTATGATATATTACCTCATAATCAAGACAAATGGAAAGAGATTATGAAAGTGCAAGAAAAGAAGGGAGTTCTGGAATGTTTGTTCTAAATTGGTGAT
GTAATTTCTTTTCTTTATCTTTTTGCTGCATCTTATGTGTCATTGTGTCATTCTTAATTGTGGAATGTTTTTTCTCCTCATTGTAGTGGTTTATTCCTCTXXXXXXXXXXACATTATGATATATTACCTCATAATCAAGACAAATGGAAAGAGATTACGAAAGTGCAAGAAAAGAAGGGAGTTCTGGAATGTTTGTTCTAAATTGGTGAT
>Marker743512
AAGGGATCGCCTTGCTCAAAGGAATCCGACGCCTCATTATCGGAAACCTTATATCTGTAAAGAGAGCATTCACATTGATCAAAGAAGGTTGTGAGGCTCAXXXXXXXXXXTTATTCGACCTAGTGTGTCGCCTTGGGGAGCATCATTGTTATTCGTGAAGAAGAAGGACATTAGTATGGGGATGTGCATCGACTACAGAAAGCTAAACAA
AAGGGATCGCCTTGCTCAAAGGAATCCGACGCCTCATTATCGGAAACCTTATATCTGTAAAGAGAGCATTCACATTGATCAAAGAAGGTTGTGAGGCTCAXXXXXXXXXXTTATTCGACCTAGTGTGTCGCCTTGGGGAGCATCATTGTTATTCGTGAAGAAGAAGGACATTAGTATGGGGATGTGCATCGACTACAGAAAGCTGAACAA
>Marker743538
GTAACGCTGTCGCCACAGTAGAAAGAGGGGAAGAAAAGAAAAAGAAGGAGCAAGAGGAGTGGCGGCGGCAACGACGCCGTCACCTGATGGAGGAGTGTAGXXXXXXXXXXGTCTTTTCAAGTCCTGAGTCGGTAATGAGTGGTCGGACCGGTCAATTCGCTCAGCGATTTTGACCTTCCTCCCATCTCATTTCGGTCCAAATTCTGGTTG
GCAACGCTGTCGCCACAGTAGAAAGAGGGGAAGAAAAGAAAAAGAAGGAGCAAGAGGAGTGGCGGCGGCAACGACGCCGTCACCTGATGGAGGAGTGTAGXXXXXXXXXXGTCTTTTCAAGTCCTGAGTCGGTAATGAGTGGTCGGACCGGTCAATTCGCTCAGCGATTTTGACCTTCCTCCCATCTCATTTCGGTCCAAATTCTGGTTG
>Marker747228
CTCGGTCTGTTCAACTCCACCACGATCGGACTTCAATCCAACCACGTGATTGCTGTGGAGCTTGACACGGTTCAGAACCCTGAGTTTGGAGATATCAACAXXXXXXXXXXTTACACAGCAAGTAACAAGGAGTTAAACGTAACACTTGCTCCAGTAAGAACAAGCAAACCAGAGAAGCCGCTACTGTCAACAACCGATCTTAATATAGAC
CTCGGTCTGTTCAACTCCACCACGATCGGACTTCAATCCAACCACGTGATTGCTGTGGAGCTTGACACGGTTCAGAACCCTGAGTTTGGAGATATCAACAXXXXXXXXXXTTACACAGCAAGTAACAAGGAGTTAAACGTAACACTTGCTCCAGTAAGAACAAGCAAACCAGCGAAGCCGCTACTGTCAACAACCGATCTTAAAATAGAC
>Marker747302
TTGTGAACAGGCAATGCATTGATCTCTTCCTCGCTCATAGAATGAGCAGAAGGAACATTATCAGAGTCTAGTGCTCTAAGGGCATCATAATCTGCAACAAXXXXXXXXXXACCGGAGCTCGGTGTGACCTAGCAAGCCACTGGCTGCTGCGGCGTGTGCCCGTGCCTGAGCTTGAAGTTGTTGGCAGGTTGCATACATTCGCAGGCTAGT
TTGTGAACAGGCAATGCATTGATCTCTTCCTCGCTCATAGAATGAGCAGAAGGAACATTATCAGAGTCTAGTGCTCTAAGGGCATCATAATCTGCAACAAXXXXXXXXXXACCGGAACTCGGTGTGACCTAGCAAGCCACTGGCTGCTGCGGCGTGTGCCCGTGCCTGAGCTTGAAGTTGTTGGCAGGTTGCATACATTCGCAGGCTAGT
>Marker747360
ACCTCCGTCGGGTTCCCCTTCACATCCTTGGAACTTCCGAGATCGTTACCATGCTCCGCGAAAGCATACACATGAGTGTTCCTCACCGGAACCCTTATCTXXXXXXXXXXGCTGCACCCAACTCCCCCATGTTGTAGCCTCTGACGGAGTAAGGTCCACCGAGTGTGAAAGCATCGTAGCTCGGAAGATCTCCGACACAACCCCCGTAAT
ACCTCCGTCGGGTTCCCCTTCACATCCTTGGAACTTCCGAGATCGTTACCATGCTCCGCGAAAGCATACACATGAGTGTTCCTCACCGGAACCCTTATCTXXXXXXXXXXGCTGCACCCAACTCCCCCATGTTGTAGCCTCTGACCGAGTAAGGTCCGCCGAGTGTGAAAGCATCGTAGCTCGGAAGATCTCCGACACAACCCCCGTAAT
>Marker747384
AGAGAGAGTCGTCGGGAGGAGCAATGGCTGCCACATCCACCACTACTAGCTCCGTTTACATCCACGTCATTGAGGACTTGATCAGCAAGGTCCGCGAGGAXXXXXXXXXXATTGTTCTGGTATGTGCCGTCCACAGCGCTAGGGTTTTTCGTAGGATCGGTGTTTTCTGGATCCGAATATAATGCCTATTGGAGATTGCTGGATTTGTCT
AGAGAGAGTCGTCGGGAGGAGCAATGGCTGCCGCATCCACCACTACTAGCTCCGTTTACATCCACGTCATTGAGGACTTGATCAGCAAGGTCCGCGAGGAXXXXXXXXXXATTGTTCTGGTATGTGTCGTCCACAGCGCTAGGGTTTTTCGTAGGATCGGTGTTTTCTGGATCCGAATATAATGCCTATTGGAGATTGCTGGATTTGTCT
>Marker747411
CGCCGGTGAAGACCGGGCTAAGCTTTCTGCTGTTAAAGCAGCTTGTGCGAAGAGTTCGATTGCGGGAGTTGGTAACTCCGTCCAGATACGGATGGGCATAXXXXXXXXXXCGACCACTGATCGATTCAGCCCTTTGATATTGCGATGTTCGAACGAAACAGTTCCTCCAGGCTGGATGGAAGCCTGAAAGAAGAATTTCAGTTAGTAAGT
CGCCGGTGAAGACTGGGCTAAGCTTTCTGCTGTTAAAGCAGCTTGTGCGAAGAGTTCGATTGCGGGAGTTGGTAACTCCGTCCAGATACGGATGGGCATAXXXXXXXXXXCGACCACTGATCGATTCAGCCCTTTGATATTGCGATGTTCGAACGAAACAGTTCCTCCAGGCTGGATGGAAGCCTGAAAGAAGAATTTCAGTTAGTAAGT
>Marker747424
TTCACTGTTCACCACATATGCCTTCATTTTATAGCCTAATGTTTTGGTATAACGCTTTTTTTTGTTCGTGCATCAGTTTTTCGAGCATGGACTGCCATCAXXXXXXXXXXAAGAGATCTTTAAGTTCCTTTGCATGATCAAATTTAATTTATTCAGGCAATCGAGGTTGTGGACCTTGACCAGAAGATCCAAATGGTTGGAGAGCTCGAG
TTCACTGTTCACCACATATGCCTTCATTTTATAGCCTAATGTTTTGGTATAACGCTTTTTTTTGTTCGTGCATCAGTTTTTCGAGCATGGACTGCCATCAXXXXXXXXXXAAGAGATCTTTAAGTTCCTTTGCATGATCAAATTTAATTTATTCAGGCAATCGAGGTTGTGGACCTTGACCAGAAGATCCAAATGGTTGGAGAGCTGGAG
>Marker747671
TAAGATTATTTACACTCGACTGATTTTTTTTTCTTGTGTCTTTTGTATTGATTGGTTAGGGAAAGGCAAAAGCCCAGAAGTGTTTCCAGATCACCTGATGXXXXXXXXXXATCACCATCACCACCTATACGGCGGCGCAGATCACCTTCACCCATTCGACGGCGAAGATCGCCTTCACCACTTCGCAGAAGGAATAGATCACGTTCTCCG
TAAGATTATTTACACTCGACTGATTTTTTTTTCTTGTGTCTTTTGTATTGATTGGTTAGGGAAAGGCAAAAGCCCAGAAGTGTTTCCAGATCACCTGATGXXXXXXXXXXATCACCATCACCTACTATACGGCGGCGCAGATCACCTTCACCCATTCGACGGCGAAGATCGCCTTCACCACTTCGCAGAAGGAATAGATCACGTTCTCCG
>Marker748014
ATGTAACTTTGAATCGAATTACAAATGGTTTTTTTTTTGGAATTTTCAAATGTTACATATCGGTTCAGTTTGAAGACTTTTACATAACAATTTACAAAATXXXXXXXXXXTAACCATTTTCATATACCTAACCAGTTTCCGAAACAGTAAGTATATCGTAATGCAGCTATTAATGCCTCGACAATGGGTCATTAAGTGACACATCAAACA
ATGTAACTTTGAATCGAATTACAAATGGTTTTTTTTTGGAATTTTCAAATGTTACATATCGGTTCAGTTTGAAGACTTTTACATAACAATTTACAAAATTXXXXXXXXXXTAACCATTTTCATATACCTAACCAGTTTCCGAAACAGTAAGTATATCGTAATGCAGCTATTAATGCCTCGACAATGGGTCATTAAGTGACACATCAAACA
>Marker749095
TTTAACGTCCATCGGTTGTTCGTGTTCTGATTCAGGAACAAGACTAATCATTAACCAATCATTTTGTGCAAACAGAACGTTCAAGTAGAGGTTCATGAAGXXXXXXXXXXTCCAAGATCGAGTGCACATCAATGCCTCCACATTTTTTTGATGCAATCTACTACGATGAGGATCGAGCAGTTGACCCCCTGAACTGAAGGCTGATTCAGA
TTTAACGTCCATCGGTTGTTCGTGTTCTGATTCAGGAACAAGACTAATCATTAACCAATCATTTTGTGCAAACAGAACGTTCAAGTAGAGGTTCATGAAGXXXXXXXXXXTCCAAGATCGAGTGCACATCAATGCCTCCACATTTTTTTGATGCAATCTACTACGATGAGGATCGAGCAGTCGACCCCCTGAACTGAAGGCTAATTCAGA
>Marker752347
GGTTGTCCCTTTTTATAGATATTTACATGTGTTGTTCGATATGAGTGCCTCACATTCTTTTATCTCTGCCGCTATCGTTCGACTTTTACCAGTATTGCCTXXXXXXXXXXTTGTAAGAAGAAGATGATCAGGTTCTTGATACCTGAGCAAGAAGATGCAGTCATGACAGGGATTCAGCAGCAGATGCATCACAAGCGACCTTTCATTTCT
GGTTGTCCCTTTTTATAGATATTTACATGTGTTGTTCGATATGAGTGCCTCACATTCTTTTATCTCTGCTGCTATCGTTCGACTTTTACCAGTATTGCCTXXXXXXXXXXTTGTAAGAAGAAGATGATCAGGTTCTTGATACCTGAGCAAGAAGATGCAGTCATGACAGGGATTCAGCAGCAGATGCATCACAAGCGACCTTTCATTTCT
>Marker753991
[truncated: 5,018 more rows]
